# Supplementary material for: High-fat diet alters the radiation tolerance of female mice and the modulatory effect of melatonin
Source: Royal Society of Chemistry journal article supplement (doi:10.1039/d3fo01831h), 2023-01-01
Supplement: d3fo01831h2.pdf [file d3fo01831h2.pdf]

| ID          | Name                        | Formula      | Molecular Weight | RT [min] | m/z       | mzCloud_Resul | mzVault_Resul | MassList_Resu | pos_OL_C1   | pos_OL_C2   | pos_OL_C3   | pos_OL_C4   | pos_OL_C5   | pos_OL_C6   | pos_OL_HW1  |
|-------------|-----------------------------|--------------|------------------|----------|-----------|---------------|---------------|---------------|-------------|-------------|-------------|-------------|-------------|-------------|-------------|
| Com_4_pos   | Oleamide                    | C18 H35 N O  | 281.27134        | 9.877    | 282.27872 | Full match    | Full match    | No results    | 17714793714 | 59666935597 | 23756364678 | 22776489044 | 47169726878 | 42133285628 | 21582351015 |
| Com_17_pos  | Nicotinic acid              | C6 H5 N O2   | 123.03209        | 1.9      | 124.03946 | Full match    | Full match    | Full match    | 13734223557 | 4012297430  | 5470021801  | 5616623217  | 9718167890  | 15571602482 | 2122804256  |
| Com_45_pos  | Tiglic acid                 | C5 H8 O2     | 100.05244        | 1.419    | 101.05978 | Full match    | Full match    | Full match    | 3106510040  | 4727445640  | 3813139866  | 3172650415  | 3861702973  | 3805046514  | 6558434835  |
| Com_46_pos  | Betaine                     | C5 H11 N O2  | 117.07893        | 1.43     | 118.08611 | Full match    | Full match    | Full match    | 2205644502  | 2669699206  | 3470524396  | 3246013771  | 3711224494  | 3893194661  | 6737936224  |
| Com_50_pos  | Hexadecanamide              | C16 H33 N O  | 255.25574        | 9.661    | 256.26334 | Full match    | Full match    | No results    | 1869854074  | 7275174742  | 3211803911  | 3239902330  | 5488401823  | 4475685009  | 2452642618  |
| Com_55_pos  | L-(+)-Citric acid           | C6 H13 N3 O7 | 175.09569        | 1.299    | 176.10301 | Full match    | Full match    | Full match    | 1741616320  | 503599209.9 | 873170109.2 | 265947470.7 | 1198515765  | 1181209097  | 515743373.1 |
| Com_58_pos  | 5-Aminovaleric acid         | C5 H11 N O2  | 117.07895        | 1.497    | 118.08612 | Full match    | Full match    | Full match    | 958242497.4 | 1754807249  | 1663533880  | 1296858246  | 1700134005  | 1699635196  | 2529096982  |
| Com_79_pos  | Indole-3-acetylserine       | C11 H9 N O2  | 187.0632         | 5.172    | 188.0701  | Full match    | Full match    | Full match    | 1146386521  | 2105299521  | 1891135185  | 1593750453  | 2330951995  | 2386943049  | 1173176363  |
| Com_90_pos  | Choline                     | C5 H13 N O   | 103.09979        | 1.25     | 104.10706 | Full match    | Full match    | No results    | 554948704.9 | 4665002439  | 2176261713  | 1996464789  | 1664482444  | 823120585.8 | 2281038864  |
| Com_102_pos | Monolein                    | C21 H40 O4   | 356.29213        | 9.927    | 357.29929 | Full match    | Full match    | Full match    | 5925148.649 | 2449778804  | 3505087806  | 50814360.01 | 436492978.8 | 38976032.21 | 1226337714  |
| Com_111_pos | Proline                     | C5 H9 N O2   | 115.06332        | 1.391    | 116.07065 | Full match    | Full match    | Full match    | 1234765675  | 1510141097  | 1293608107  | 1220935726  | 1510948544  | 1839341486  | 1834040828  |
| Com_117_pos | Creatinine                  | C4 H7 N3 O   | 113.05901        | 1.305    | 114.06628 | Full match    | Full match    | Full match    | 103730466.5 | 705768551   | 48428701.11 | 411620006.2 | 56836838.77 | 107574608.2 | 3013778870  |
| Com_151_pos | 8-Hydroxyquinoline          | C9 H7 N O    | 145.05234        | 5.503    | 146.05954 | Full match    | Full match    | No results    | 205335990.4 | 1660796625  | 1692947775  | 3344531139  | 407794735.2 | 3373217431  | 2059222261  |
| Com_153_pos | Acetanilide                 | C8 H9 N O    | 135.06837        | 2.29     | 136.07558 | Full match    | Full match    | No results    | 270040945.1 | 969296821   | 854204458.4 | 449633483.2 | 1189273620  | 707247039   | 619790446.3 |
| Com_165_pos | L-Valine                    | C5 H11 N O2  | 117.07893        | 1.665    | 118.08612 | Full match    | Full match    | Full match    | 710919966.1 | 1447642083  | 842433321.8 | 725359896.8 | 708129026.5 | 789217522.3 | 1110102435  |
| Com_236_pos | 9-Oxo-10(E)-undecanoic acid | C18 H30 O3   | 294.21905        | 7.987    | 295.22629 | Full match    | Full match    | Full match    | 241186884.3 | 1301926575  | 559289022.3 | 465001578.3 | 715457669.3 | 269936660.3 | 1256199415  |
| Com_268_pos | Acetophenone                | C8 H8 O      | 120.05751        | 2.534    | 121.06481 | Full match    | Full match    | No results    | 166820210.3 | 537091217.6 | 236641512.2 | 204468379.6 | 220055712.7 | 189732760.3 | 120416184.6 |
| Com_281_pos | Acetylcholine               | C7 H15 N O2  | 145.11023        | 1.347    | 146.11754 | Full match    | Full match    | No results    | 213122143.5 | 508897019.1 | 532784826.7 | 484022693.8 | 172932625.3 | 315065374.1 | 243924709.6 |
| Com_293_pos | Cytosine                    | C4 H5 N3 O   | 111.04325        | 1.419    | 112.05042 | Full match    | Full match    | Full match    | 188679296.8 | 392904451.8 | 402589599.6 | 405116143.2 | 512133131.5 | 312443987.4 | 905196488.3 |
| Com_309_pos | Urocanic acid               | C6 H6 N2 O2  | 138.0429         | 1.431    | 139.05003 | Full match    | Full match    | Full match    | 299106000.2 | 183763814.2 | 389969640.9 | 301821013.2 | 473826671   | 239612583.9 | 207110417.4 |
| Com_334_pos | 2-Oxindole                  | C8 H7 N O    | 133.0526         | 5.647    | 134.06027 | Full match    | Full match    | Full match    | 289124415.8 | 122103174.5 | 161389379.8 | 182453733.4 | 33826353.27 | 531138644.1 | 43870531.99 |
| Com_450_pos | tert-Butylamine             | C11 H22 N O  | 230.16292        | 5.056    | 231.1701  | Full match    | Full match    | No results    | 141171620.9 | 319402374.1 | 251894170.6 | 62631648.97 | 194534772.9 | 93922350.33 | 68502374.97 |
| Com_456_pos | DL-Lysine                   | C6 H14 N2 O2 | 146.10558        | 1.242    | 147.11282 | Full match    | Full match    | Full match    | 199616840.9 | 67126226.15 | 57046727.45 | 50620983.87 | 85202624.1  | 84547167.17 | 548812984.1 |
| Com_458_pos | Cuminaldehyde               | C10 H12 O    | 148.08865        | 6.763    | 149.09607 | Full match    | Full match    | No results    | 346355769.9 | 524602070.3 | 465966003.5 | 413641014.1 | 373255259.8 | 469614719.9 | 316530250.7 |
| Com_460_pos | Genistein                   | C15 H10 O5   | 270.05215        | 5.955    | 271.05908 | Full match    | Full match    | No results    | 16345027.1  | 62386274.05 | 128566434   | 101823380.9 | 111198313   | 55812568.99 | 38903158.93 |
| Com_505_pos | Thiamine                    | C12 H16 N4 O | 264.10451        | 1.298    | 265.11163 | Full match    | Full match    | No results    | 381439004.6 | 72385716.06 | 127640650.3 | 198779793.2 | 278303873.3 | 291848597.7 | 340152244.9 |
| Com_516_pos | Trigonelline                | C7 H7 N O2   | 137.04765        | 1.396    | 138.05513 | Full match    | Full match    | Full match    | 369484582.5 | 379772481.1 | 399139633.3 | 254757380.2 | 413569134.3 | 391973801.7 | 224090274.9 |
| Com_535_pos | L-Threonine                 | C4 H6 O4     | 118.02664        | 2.629    | 119.0339  | Full match    | Full match    | Full match    | 128847739.7 | 88641435.96 | 295542920.4 | 240989917.2 | 247543008.1 | 228550778.4 | 463067297.3 |
| Com_545_pos | Indole                      | C8 H7 N      | 117.05773        | 6.053    | 118.06508 | Full match    | Full match    | No results    | 59980465.76 | 106525630.9 | 236085877.6 | 260839414.4 | 234884965.7 | 214692028.8 | 215431277.9 |
| Com_597_pos | Naringenin                  | C15 H12 O5   | 272.06806        | 5.835    | 273.07559 | Full match    | Full match    | No results    | 3074682.805 | 6364391.874 | 10402968.6  | 23266187.79 | 6605813.025 | 2716436.076 | 12007226.72 |
| Com_669_pos | Isohomovanillin             | C9 H10 O4    | 182.0579         | 5.225    | 183.06517 | Full match    | Full match    | Full match    | 6780914.159 | 35910785.88 | 41744009.58 | 53503003.05 | 17419253.97 | 10645209.9  | 362580159.1 |
| Com_671_pos | 7-Methylguanine             | C6 H7 N5 O   | 165.0651         | 2.065    | 166.07242 | Full match    | Full match    | Full match    | 93509254.93 | 59636185.03 | 75572912.8  | 51164066.43 | 74797814.38 | 72351246.58 | 94132272.65 |
| Com_686_pos | Cytidine                    | C9 H13 N3 O5 | 243.08552        | 1.417    | 244.09267 | Full match    | Full match    | Full match    | 139385761.7 | 189027658.6 | 181142903.9 | 193967823.6 | 229163667.2 | 179638033.5 | 346233571.1 |
| Com_714_pos | 2,4-Dimethylamine           | C9 H10 O     | 134.07302        | 6.413    | 135.08041 | Full match    | Full match    | No results    | 124115263.7 | 404007914.3 | 313890875.9 | 240640489.6 | 189162380.5 | 227488838.9 | 185883366.6 |

|              |                               |           |       |           |            |            |            |             |             |             |             |             |             |             |
|--------------|-------------------------------|-----------|-------|-----------|------------|------------|------------|-------------|-------------|-------------|-------------|-------------|-------------|-------------|
| Com_747_pos  | L-PyroglytanC5 H7 N 03        | 129.04264 | 2.157 | 130.04976 | Full match | Full match | Full match | 209910868.9 | 80949905.76 | 60424562.25 | 96674553.41 | 110413812.1 | 182752498.3 | 67530527.32 |
| Com_810_pos  | D-Alanyl-D-αC6 H12 N2 O       | 160.08474 | 1.364 | 161.0919  | Full match | Full match | Full match | 210183947.5 | 55618348.01 | 61367228.05 | 25741441.82 | 92399667.57 | 69282650.61 | 34626115.78 |
| Com_861_pos  | D-Raffinose C18 H32 O16       | 504.16815 | 1.374 | 505.17426 | Full match | Full match | Full match | 114438705   | 93633276.71 | 261832487.8 | 341517764   | 354972135.6 | 291212111.2 | 50626157.49 |
| Com_897_pos  | Carvone C10 H14 O             | 150.10438 | 5.557 | 151.11182 | Full match | Full match | No results | 176883344.4 | 148638705.8 | 179979487.9 | 407895285.7 | 249388633.4 | 314972333   | 259706914.2 |
| Com_903_pos  | Oleoyl etharC20 H39 N O       | 325.29751 | 9.788 | 326.30484 | Full match | Full match | No results | 178768979   | 166054439.4 | 108529653   | 126095051.8 | 333122728   | 165569382.1 | 158407226.3 |
| Com_944_pos  | N6-Acetyl-L-C8 H16 N2 O       | 188.11606 | 1.421 | 189.1234  | Full match | Full match | Full match | 187172827.7 | 95730254.59 | 96929367.93 | 104590892.5 | 166204253.2 | 176569763.1 | 71652217.11 |
| Com_1087_pos | DL-CarnitineC7 H15 N O3       | 161.10519 | 1.299 | 162.11269 | Full match | Full match | Full match | 73821517.95 | 249004579.8 | 195499307.5 | 176810356.8 | 168965024.8 | 182523552.4 | 201082838.4 |
| Com_1089_pos | N3, N4-DimethylC8 H18 N4 O    | 202.14301 | 1.357 | 203.15027 | Full match | Full match | Full match | 159789535.7 | 74314302.16 | 69305984.8  | 62083328.29 | 121532918.3 | 198625688.5 | 72486763.68 |
| Com_1146_pos | N8-AcetylserineC9 H21 N3 O    | 187.16863 | 1.225 | 188.17589 | Full match | Full match | No results | 150601340.7 | 30481661.07 | 47583569.56 | 36422754.86 | 128355093.4 | 144390368.5 | 33099265.01 |
| Com_1158_pos | L-GlutamylC10 H16 N2 O        | 276.0957  | 1.419 | 277.10309 | Full match | Full match | Full match | 149185759.8 | 95129667.83 | 88487072.01 | 51242987.8  | 104476162.9 | 138198071.5 | 45450924.59 |
| Com_1280_pos | (R)-Equol C15 H14 O3          | 242.09398 | 5.913 | 243.10132 | Full match | Full match | Full match | 119078224.2 | 121781609.3 | 101887239.1 | 189708575.2 | 120412888.3 | 153174948.8 | 65743414.1  |
| Com_1380_pos | Ecgonine methylC10 H17 N O    | 199.1209  | 4.961 | 200.12822 | Full match | Full match | No results | 126137920.6 | 39594118.94 | 44391021.43 | 70983981.57 | 85771342.67 | 129596790.3 | 30762432.86 |
| Com_1412_pos | N-Acetyl-D-lysineC14 H25 N O  | 383.14289 | 1.406 | 384.1503  | Full match | Full match | No results | 97237447.77 | 98419322.82 | 157870622   | 43007457.24 | 93253741.03 | 74984464.58 | 56725643.9  |
| Com_1542_pos | D-Serine C3 H7 N O3           | 105.04267 | 1.252 | 106.04998 | Full match | Full match | Full match | 22123332.49 | 76319238.3  | 49807755.19 | 39897604.4  | 43460897.42 | 29327571.6  | 143895608.1 |
| Com_1664_pos | Spermidine C7 H19 N3          | 145.15809 | 1.219 | 146.16533 | Full match | Full match | Full match | 102396500.1 | 34672951.66 | 53457475.45 | 66232376.19 | 11281080.12 | 17411587.7  | 31378114.65 |
| Com_1737_pos | IsoquinolineC9 H7 N           | 129.05769 | 5.883 | 130.06517 | Full match | Full match | No results | 97938585.11 | 40643484.99 | 36943475.46 | 51402874.2  | 60197724.67 | 104034069.5 | 13766292.65 |
| Com_1925_pos | GlycylprolineC7 H12 N2 O      | 172.08483 | 1.437 | 173.09218 | Full match | Full match | Full match | 85168950.27 | 95870639.07 | 91695776.76 | 123192950.3 | 94969772.87 | 122887294.7 | 56892934.56 |
| Com_1962_pos | Histamine C5 H9 N3            | 111.0797  | 1.156 | 112.08688 | Full match | Full match | Full match | 6166153.555 | 26815432.27 | 20443267.37 | 172184770.5 | 12815716.71 | 15439406.29 | 64147154.09 |
| Com_1986_pos | Methyl indolC11 H11 N O       | 189.07872 | 5.881 | 190.08626 | Full match | Full match | Full match | 85578652.76 | 25219326.02 | 25172591.79 | 35564873.97 | 40288138.83 | 62473355.53 | 7557590.99  |
| Com_2000_pos | Nootkatone C15 H22 O          | 218.1668  | 9.117 | 219.17427 | Full match | Full match | No results | 23374668.33 | 46862191.11 | 68243831.07 | 126336597.1 | 142306807.7 | 34434309.65 | 87371305.23 |
| Com_2376_pos | L-(+)-ArginineC6 H14 N4 O     | 174.11181 | 1.403 | 175.11913 | Full match | Full match | Full match | 36311105.78 | 41156711.5  | 26206916.02 | 46140265.19 | 47894083.82 | 50813478.93 | 32438477.91 |
| Com_2518_pos | 4', 7-DihydroC15 H12 O4       | 256.07309 | 5.73  | 257.08063 | Full match | Full match | No results | 3300724.378 | 101714852.1 | 52249893.14 | 40152887.33 | 22024076.75 | 11739925.78 | 43135989.05 |
| Com_2524_pos | DL-α-AminoC8 H17 N O2         | 159.12582 | 4.025 | 160.13318 | Full match | Full match | Full match | 65228050.92 | 36342529.36 | 37214710.44 | 92871014.12 | 61337837.22 | 65354650.79 | 37133025.48 |
| Com_2688_pos | N-AcetylserineC12 H14 N2 O    | 218.10508 | 5.289 | 219.11238 | Full match | Full match | Full match | 26752793.99 | 24853220.29 | 66225960.71 | 89063082.68 | 99475317.82 | 76081496.31 | 23235347.18 |
| Com_3101_pos | 4-PhenylbutylC10 H12 O2       | 164.08374 | 9.774 | 165.091   | Full match | Full match | Full match | 37628809.66 | 56904087.36 | 33595644.68 | 78693265.17 | 53358641.93 | 34655082.73 | 43138800.41 |
| Com_3166_pos | Coumarin C9 H6 O2             | 146.03635 | 5.824 | 147.04382 | Full match | Full match | Full match | 24962372.42 | 14859368.52 | 18880770.26 | 43583313.66 | 26235604.43 | 29514980.39 | 62108997.78 |
| Com_3180_pos | D-SphingosineC18 H37 N O      | 299.28193 | 6.912 | 300.28894 | Full match | Full match | Full match | 14339917.96 | 44844926.01 | 14715121.18 | 8642456.862 | 15083713.45 | 12496995.08 | 19267737.71 |
| Com_3307_pos | Acetyl-L-carnitineC9 H17 N O4 | 203.11574 | 1.705 | 204.12296 | Full match | Full match | Full match | 6471872.871 | 71008134.6  | 36776735.8  | 32588201.27 | 34120187.26 | 19860268.24 | 21884372.11 |
| Com_3331_pos | Kynurenic acidC10 H7 N O3     | 189.04227 | 5.926 | 190.04991 | Full match | Full match | Full match | 45239722.42 | 19037343.4  | 39279399.48 | 50321106.36 | 30996997.93 | 19463460.52 | 2865708.265 |
| Com_3332_pos | 2-HydroxyphenylC9 H11 N O3    | 181.07354 | 5.57  | 182.08142 | Full match | Full match | Full match | 42579690.89 | 35025711.86 | 43014042.57 | 62911467.25 | 51915382.14 | 49579594.11 | 50508914.24 |
| Com_3421_pos | 2-Amino-1, 3, C18 H39 N O     | 317.29243 | 6.881 | 318.29874 | Full match | Full match | No results | 8994722.115 | 59775950.56 | 26647169.89 | 21603812.87 | 16230793.76 | 13254586.36 | 35030737.1  |
| Com_3444_pos | (+)-ar-TurmeroneC15 H20 O     | 216.15108 | 5.534 | 217.15811 | Full match | Full match | No results | 39316119.5  | 22335079.69 | 17820770.82 | 70367362.32 | 51327555.2  | 61611497.97 | 50445433.49 |
| Com_3478_pos | Kahweol C20 H26 O3            | 314.18791 | 5.868 | 315.19516 | Full match | Full match | Full match | 20443528.17 | 19756671.27 | 19024182.79 | 47276758.6  | 24431487.86 | 27496714.16 | 31677794.68 |
| Com_4213_pos | Indole-3-acetylC10 H9 N O2    | 175.06308 | 5.722 | 176.07043 | Full match | Full match | Full match | 17466215.43 | 21552824.04 | 35497952.33 | 78888232.7  | 56571920.05 | 47791212.68 | 21305431.44 |
| Com_4493_pos | Methyl cinnamicC10 H10 O2     | 162.06784 | 5.613 | 163.07484 | Full match | Full match | No results | 15843444.08 | 16200975.3  | 17014561.36 | 28922696.79 | 23340562.85 | 18297874.46 | 27719174.19 |

|                                             |           |       |           |            |            |            |             |             |             |             |             |             |             |
|---------------------------------------------|-----------|-------|-----------|------------|------------|------------|-------------|-------------|-------------|-------------|-------------|-------------|-------------|
| Com_4583_pos:Flavin mono C17 H21 N4 (       | 456.10417 | 5.397 | 457.11218 | Full match | Full match | Full match | 30497599.52 | 4612638.398 | 8166173.996 | 4494097.774 | 21816832.32 | 36992492.13 | 1501126.823 |
| Com_4762_pos:5 $\alpha$ -Dihydro C19 H30 O2 | 290.2244  | 8.268 | 291.23181 | Full match | Full match | Full match | 13305457.99 | 45301993.91 | 28565593.62 | 19960141.37 | 40557854.56 | 23238609.47 | 24665273.04 |
| Com_4785_pos:N6,N6,Tri C9 H20 N2 O2         | 188.15266 | 1.215 | 189.15988 | Full match | Full match | No results | 28897965.7  | 22870835.03 | 25324210.68 | 18766413.95 | 36188294.28 | 37583853.27 | 34975182.01 |
| Com_4931_pos:trans-Cinnan C9 H8 O           | 132.05732 | 5.571 | 133.06488 | Full match | Full match | No results | 27844908.81 | 25856923.49 | 27239090.23 | 44616907.58 | 24933758.32 | 41185434.74 | 31354975.68 |
| Com_5508_pos:Apigenin C15 H10 O5            | 270.05284 | 6.083 | 271.06012 | Full match | Full match | No results | 1195722.568 | 7378590.981 | 9655294.726 | 7643274.415 | 8356372.989 | 4517978.409 | 9881014.158 |
| Com_5871_pos:Folinic acid C20 H23 N7 (      | 473.16594 | 5.005 | 474.17322 | Full match | Full match | No results | 1221684.783 | 1038270.089 | 2357005.369 | 646658.3584 | 793766.6228 | 758373.1473 | 791819.7963 |
| Com_6198_pos:3-Hydroxylic C14 H22 N2 (      | 250.16782 | 5.023 | 251.17506 | Full match | Full match | No results | 20268607.42 | 9368607.528 | 10279145.23 | 16200875.58 | 4715704.185 | 19651425.94 | 8314074.8   |
| Com_6367_pos:2-Amino-1,3-C18 H39 N O2       | 301.29773 | 7.071 | 302.30475 | Full match | Full match | Full match | 10873460.08 | 19803550.64 | 7695193.242 | 8426745.229 | 11968382.2  | 8247943.043 | 8979354.759 |
| Com_6370_pos:4-Ethoxybenz C9 H10 O2         | 150.06795 | 9.207 | 151.07529 | Full match | Full match | Full match | 18439208.51 | 13075840.61 | 9574627.935 | 15337278.94 | 7127228.772 | 11044300.51 | 9717688.554 |
| Com_16_pos: Hypoxanthine C5 H4 N4 O         | 136.03852 | 1.978 | 137.04575 | Full match | Full match | Full match | 14566270690 | 10420190620 | 9261827704  | 9290814157  | 13737230503 | 25996603746 | 2876884373  |
| Com_21_pos: L-Phenylalar C9 H11 N O2        | 165.07896 | 4.898 | 166.08632 | Full match | Full match | Full match | 2716995757  | 7200643049  | 4197618618  | 2431850468  | 4367132476  | 2971919271  | 4181262513  |
| Com_24_pos: L-Glutamic acid C5 H9 N O4      | 147.05313 | 1.292 | 148.06032 | Full match | Full match | Full match | 11042303488 | 2146468484  | 2415852016  | 1302968016  | 4081647877  | 6969548724  | 1876294609  |
| Com_48_pos: Methionine C5 H11 N O2          | 149.05105 | 1.881 | 150.05846 | Full match | Full match | Full match | 2861106995  | 3981524013  | 2550040365  | 1446140011  | 821267996.5 | 2428533700  | 1491805388  |
| Com_83_pos: DL-Tryptophan C11 H12 N2 (      | 204.08941 | 5.17  | 205.09668 | Full match | Full match | Full match | 1129103598  | 2072011141  | 1862963653  | 1565506701  | 2275236850  | 2349412436  | 1141272999  |
| Com_93_pos: Creatine C4 H9 N3 O2            | 131.06947 | 1.358 | 132.07663 | Full match | Full match | Full match | 1266301839  | 4480723198  | 3475916117  | 3398937696  | 2938820179  | 2474812421  | 2446330094  |
| Com_94_pos: L-Tyrosine C9 H11 N O3          | 181.07411 | 2.343 | 182.08139 | Full match | Full match | Full match | 966573969.2 | 1673011113  | 1823085261  | 465014849.6 | 1037463126  | 171502769.6 | 1120994272  |
| Com_143_pos: Taurocholic C26 H45 N O7       | 515.29172 | 8.938 | 516.29901 | Full match | Full match | Full match | 869201.6118 | 1514063.717 | 9697352.008 | 2253913.254 | 20184079.33 | 1196273.739 | 1256112.175 |
| Com_147_pos: Leucylprolin C11 H20 N2 (      | 228.14724 | 5.111 | 229.15445 | Full match | Full match | Full match | 618184999.7 | 884656975.3 | 682423504.9 | 554885797.8 | 803911444.5 | 550477636.7 | 484329484.9 |
| Com_167_pos: N-Acetyl-D-gluc C8 H15 N O6    | 221.08985 | 1.389 | 222.09712 | Full match | Full match | Full match | 1596444008  | 880924982.2 | 1001991550  | 610459344.5 | 1302429046  | 924341224.2 | 581610986.6 |
| Com_168_pos: 5-Hydroxyin C10 H9 N O3        | 191.05774 | 5.502 | 192.06487 | Full match | Full match | Full match | 1321272186  | 1550578382  | 1533984380  | 2803413840  | 2395971713  | 3007228400  | 1711814952  |
| Com_175_pos: Pilocolic acid C6 H11 N O2     | 129.0789  | 1.217 | 130.08591 | Full match | Full match | Full match | 204103951.5 | 501555626.2 | 438790431.4 | 396984742.3 | 831019138.8 | 784205694.3 | 543395852   |
| Com_224_pos: Pantothenic C9 H17 N O5        | 219.11056 | 5.069 | 220.11795 | Full match | Full match | Full match | 635853979.8 | 164676714.1 | 351987482.4 | 283140173.6 | 415029637.8 | 568526484.4 | 244891127.5 |
| Com_232_pos: Adenine C5 H5 N5               | 135.05454 | 1.628 | 136.06168 | Full match | Full match | Full match | 212468679   | 90055753.35 | 433963236.1 | 816970501.1 | 181208286.7 | 969002912.1 | 982604777.3 |
| Com_239_pos: DL-Arginine C6 H14 N4 O2       | 174.11179 | 1.243 | 175.11896 | Full match | Full match | Full match | 90965798.12 | 575028319.2 | 196273001   | 283874761.8 | 392360135.2 | 153147567.7 | 331254442.3 |
| Com_266_pos: L-Threonine C4 H9 N O3         | 119.05829 | 1.282 | 120.06554 | Full match | Full match | Full match | 609081033.8 | 287363742   | 249113665.4 | 207378166.2 | 425106890.6 | 504324589.7 | 432608059.5 |
| Com_286_pos: Guanine C5 H5 N5 O             | 151.04939 | 3.767 | 152.0567  | Full match | Full match | Full match | 716516769.9 | 450146504   | 341174517.7 | 203620318   | 1029011559  | 99847908.9  | 503367899.3 |
| Com_287_pos: 4-Hydroxyber C7 H6 O2          | 122.0368  | 2.298 | 123.04393 | Full match | Full match | Full match | 198045811.2 | 594473776.8 | 310679336.7 | 58883155.8  | 424801925.1 | 87446529.12 | 194091842.1 |
| Com_298_pos: N-Acetylneu C11 H19 N O2       | 309.10574 | 1.371 | 310.11288 | Full match | Full match | Full match | 475582883.2 | 1071562793  | 736364312.8 | 517399778.2 | 614587797.2 | 310468357.7 | 238377828.8 |
| Com_374_pos: L-Histidine C6 H9 N3 O2        | 155.06964 | 1.276 | 156.077   | Full match | Full match | Full match | 58485126.28 | 62547700.96 | 275535707.2 | 60128786.59 | 62036296.91 | 54007121.19 | 193830495.3 |
| Com_408_pos: Valylprolin C10 H18 N2 (       | 214.1317  | 4.816 | 215.13895 | Full match | Full match | No results | 156998454.3 | 280455373   | 249035387.1 | 186425567.1 | 353351508.8 | 225398867.7 | 129312880.7 |
| Com_468_pos: D-(-)-Glutan C5 H10 N2 O2      | 146.0692  | 1.268 | 147.07643 | Full match | Full match | Full match | 144248396.6 | 367130422.1 | 224227328.8 | 148207156.3 | 271070832.9 | 157824022.1 | 468789236.2 |
| Com_476_pos: Riboflavin C17 H20 N4 (        | 376.13772 | 5.352 | 377.14505 | Full match | Full match | Full match | 79875673.42 | 90765041.4  | 17240994.42 | 103895830.2 | 680166293.2 | 115658153.4 | 60832795.45 |
| Com_579_pos: L-Aspartic acid C4 H7 N O4     | 133.03752 | 1.264 | 134.0448  | Full match | Full match | Full match | 51152150    | 103232188.3 | 59912186.94 | 61946264.55 | 63758483.96 | 97175134.33 | 117684419.9 |
| Com_580_pos: 18- $\beta$ -Glycy C30 H46 O4  | 470.33912 | 7.04  | 471.34601 | Full match | Full match | No results | 21979209.26 | 51852532.16 | 50949995.55 | 163571384.6 | 24131185.27 | 23303475.63 | 305618751.8 |
| Com_694_pos: Xanthine C5 H4 N4 O2           | 152.0334  | 4.709 | 153.04062 | Full match | Full match | Full match | 265320637.8 | 106232049.1 | 95432638.63 | 30614412.62 | 127051819.6 | 115596509   | 57053061.23 |

|              |              |              |           |       |           |              |               |            |             |             |             |             |             |             |             |
|--------------|--------------|--------------|-----------|-------|-----------|--------------|---------------|------------|-------------|-------------|-------------|-------------|-------------|-------------|-------------|
| Com_717_pos  | Docosahexaer | C22 H32 O2   | 328.23975 | 9.856 | 329.24667 | Full match   | Full match    | No results | 200322163.4 | 403261876.9 | 218931190.3 | 432114794.6 | 230095970   | 263503068.4 | 225521715.2 |
| Com_787_pos  | Daidzein     | C15 H10 O4   | 254.05736 | 5.805 | 255.06471 | Full match   | Full match    | No results | 41084504.74 | 364298242.2 | 262368225.3 | 244298733   | 187103900.1 | 104875947.1 | 226150393.4 |
| Com_792_pos  | Glycy1-L-leu | C8 H16 N2 O5 | 188.11602 | 5.006 | 189.12355 | Full match   | Full match    | Full match | 33272605.19 | 211797706.3 | 91246200.64 | 40099335.72 | 67189066.56 | 36465629    | 96313643.88 |
| Com_827_pos  | Arachidonic  | C20 H32 O2   | 304.24013 | 9.955 | 305.24716 | Full match   | Full match    | Full match | 111896739.2 | 236258232.1 | 87760478.83 | 172763906.2 | 118917186.9 | 173927547.2 | 72252182.68 |
| Com_916_pos  | 16-Hydroxyh  | C16 H32 O3   | 272.23612 | 7.984 | 295.22592 | Full match   | Full match    | No results | 70278700.92 | 208123290.6 | 128877315.6 | 116858503.8 | 142020449.9 | 85415205.21 | 252844827.4 |
| Com_932_pos  | N-Acetylhist | C7 H11 N3 O  | 153.0901  | 1.422 | 154.09746 | Full match   | Full match    | Full match | 15770486.1  | 22115345.15 | 25569129.04 | 119463320.4 | 27783811.98 | 31691186.85 | 98847573.07 |
| Com_966_pos  | Asparagine   | C4 H8 N2 O3  | 132.05354 | 1.259 | 133.06078 | Full match   | Full match    | Full match | 4670844.849 | 27283755.65 | 5993925.997 | 4926075.254 | 6956324.418 | 6286001.013 | 27832655.06 |
| Com_1224_pos | 6-Hydroxymel | C13 H16 N2 C | 248.11555 | 5.432 | 249.12274 | Full match   | Full match    | Full match | 12989944.45 | 8632785.823 | 11693204.5  | 26943100.46 | 14573891.93 | 18310170.8  | 16529418.09 |
| Com_1424_pos | 4-Pyridoxic  | C8 H9 N O4   | 183.05315 | 2.436 | 184.06039 | Full match   | Full match    | Full match | 121359727.2 | 57735189.25 | 134734177   | 215380374.2 | 124717210.6 | 137473706.8 | 116812220.3 |
| Com_1455_pos | Sinapinic ac | C11 H12 O5   | 224.0679  | 5.527 | 225.07483 | Full match   | Full match    | No results | 37484182.15 | 98474973.3  | 94054970.88 | 65645882.69 | 44756946.65 | 46876774.08 | 90985457.26 |
| Com_1640_pos | Xanthurenic  | C10 H7 N O4  | 205.03734 | 5.313 | 206.04478 | Full match   | Full match    | Full match | 18467468.13 | 72716567.94 | 25132636.67 | 225522466.7 | 44098678.33 | 59100941.81 | 134581163.1 |
| Com_1670_pos | DL-5-Methoxy | C12 H14 N2 C | 234.10015 | 5.124 | 235.10765 | Full match   | Full match    | No results | 14243120.92 | 14040640.97 | 14616984.88 | 25405987.8  | 17188935.84 | 14868920.47 | 13677600.4  |
| Com_1796_pos | L-Alanyl-L-γ | C8 H14 N2 O5 | 186.10038 | 1.431 | 187.10753 | Full match   | Full match    | No results | 88417312.64 | 78864061.26 | 111469100.5 | 91231377.97 | 123460018.2 | 75123017.92 | 69435053.95 |
| Com_1808_pos | Pyridoxine   | C8 H11 N O3  | 169.07385 | 2.051 | 170.08115 | Full match   | Full match    | Full match | 62833301.81 | 62475844.95 | 78495899.11 | 174141465.7 | 157998576.9 | 155377638.1 | 66673039.8  |
| Com_2102_pos | α-Aspartylγ  | C13 H16 N2 C | 280.10586 | 5.228 | 281.11328 | Full match   | Full match    | Full match | 43778464.54 | 40452349.98 | 48966842.27 | 72258706.81 | 57984214.73 | 55543580.29 | 30002953.84 |
| Com_2701_pos | L-Saccharopi | C11 H20 N2 C | 276.13207 | 1.439 | 277.13943 | Full match   | Full match    | Full match | 56827438.42 | 34937738.88 | 53504316.77 | 48609377.93 | 64878940.17 | 46502522.51 | 56674099.82 |
| Com_2846_pos | Melatonin    | C13 H16 N2 C | 232.12072 | 5.616 | 233.12827 | Full match   | Full match    | Full match | 16278271.6  | 9868081.787 | 11452981.32 | 29641700.84 | 11634010.01 | 7632052.325 | 16380357.12 |
| Com_3038_pos | l-Methylader | C11 H15 N5 C | 281.11238 | 4.956 | 282.11948 | Full match   | Full match    | Full match | 50840171    | 16499644.59 | 23073919.73 | 25013638.34 | 45988504.36 | 3542085.421 | 24695788.03 |
| Com_3693_pos | D-Pantethin  | C22 H42 N4 C | 554.24427 | 5.487 | 555.25183 | Full match   | Full match    | Full match | 3916251.778 | 2255661.521 | 3213800.879 | 14654481.27 | 2455818.073 | 3004461.52  | 7106513.75  |
| Com_3706_pos | Thymidine    | C10 H14 N2 C | 242.0902  | 4.883 | 243.09749 | Full match   | Full match    | Full match | 19695028.4  | 13503061.42 | 18242134.69 | 24957881.83 | 24744254.13 | 21997848.17 | 36856046.92 |
| Com_3924_pos | Alanyltyrosi | C12 H16 N2 C | 252.11084 | 4.005 | 253.11807 | Full match   | Full match    | No results | 10264736.69 | 9106952.478 | 5865865.982 | 3050425.21  | 3756518.075 | 6770467.202 | 2050441.404 |
| Com_4407_pos | Uric acid    | C5 H4 N4 O3  | 168.02831 | 1.83  | 169.0354  | Full match   | Full match    | Full match | 6069925.598 | 35107004.38 | 22826440.69 | 25221417.76 | 13409494.03 | 7544301.824 | 30652042.19 |
| Com_6389_pos | Biotin       | C10 H16 N2 C | 244.08799 | 5.386 | 245.09483 | Full match   | Full match    | Full match | 17744637.26 | 9218048.671 | 12604137.07 | 24531975.19 | 20804960.89 | 25488523.7  | 4840773.357 |
| Com_22_pos   | Epinephrine  | C9 H13 N O3  | 183.08943 | 5.044 | 184.09642 | Full match   | No results    | Full match | 2728085929  | 7180305510  | 4208580920  | 2457853105  | 4385537017  | 2984996911  | 4176149723  |
| Com_29_pos   | octadec-9-yr | C18 H32 O2   | 262.22947 | 9.362 | 263.23682 | Invalid mass | No results    | No results | 3786308185  | 14609079393 | 7732034762  | 6673832005  | 11650271807 | 10724108295 | 4112423460  |
| Com_33_pos   | L-Norleucine | C6 H13 N O2  | 131.09455 | 3.035 | 132.10176 | Full match   | Not the top h | Full match | 2947679479  | 7083430127  | 3589012521  | 2214833084  | 3581550224  | 3119638965  | 3952845351  |
| Com_39_pos   | jwh-018-d11  | C24 H12 [2]H | 352.23987 | 6.733 | 353.24695 | Invalid mass | No results    | No results | 1074765092  | 914335358.3 | 1648654718  | 477567266.8 | 410741323.4 | 258895311.1 | 475121047.2 |
| Com_51_pos   | 2-Hydroxycir | C9 H8 O3     | 164.0474  | 2.288 | 165.05501 | Full match   | Not the top h | Full match | 1244304723  | 3399748933  | 2363181529  | 699459192.9 | 1426709955  | 1941518627  | 1468885787  |
| Com_105_pos  | Inositol     | C6 H12 O6    | 180.06335 | 1.268 | 181.07123 | No results   | No results    | Full match | 2192272639  | 3092238155  | 3176596434  | 3528334877  | 3981602147  | 2476086960  | 951862548.7 |
| Com_112_pos  | (+/-)12(13)- | C18 H34 O4   | 296.23474 | 8.386 | 297.24191 | Invalid mass | Invalid mass  | No match   | 468531575.8 | 2611256075  | 1190734349  | 1349260177  | 1758115655  | 595596781.5 | 3159793658  |
| Com_142_pos  | 5-[(10Z)-14- | C26 H36 O4   | 412.25862 | 7.248 | 413.26569 | Invalid mass | No results    | No results | 1250691331  | 807017741.7 | 783287088.5 | 324018456.1 | 677652496.3 | 694049151   | 1408230576  |
| Com_162_pos  | Linolelaidi  | C18 H32 O2   | 280.24008 | 9.433 | 281.24774 | No results   | No results    | Full match | 98572814.59 | 1006992800  | 2162678925  | 1130345536  | 2106708681  | 1739135954  | 394477804.8 |
| Com_164_pos  | KPK          | C17 H33 N5 C | 371.25381 | 6.7   | 372.26105 | Full match   | No results    | No results | 371913503.1 | 289978578.2 | 522936160.9 | 180752382.8 | 160642315.6 | 105626975.2 | 211130578.3 |
| Com_166_pos  | Homo-Gamma-1 | C20 H34 O2   | 306.25524 | 7.238 | 307.26251 | No results   | No results    | Full match | 2613700.844 | 288283690.6 | 353241300.1 | 287721694.9 | 342798493.2 | 242971380.5 | 992191815.6 |
| Com_209_pos  | ethyl 4-amir | C7 H10 N2 O5 | 218.01921 | 1.271 | 219.0264  | Full match   | No results    | No results | 1120116053  | 436628363.1 | 639919691.3 | 550943930.4 | 1011592372  | 860422984.2 | 267946157.3 |

|             |               |              |           |       |           |              |               |            |             |             |             |             |             |             |             |
|-------------|---------------|--------------|-----------|-------|-----------|--------------|---------------|------------|-------------|-------------|-------------|-------------|-------------|-------------|-------------|
| Com_250_pos | Methylimidaz  | C6 H8 N2 O2  | 140.05849 | 1.412 | 141.06586 | Full match   | No results    | Full match | 367553994.8 | 494639628.2 | 264663416.6 | 372353962.2 | 269817721.5 | 358302114.5 | 820942925.8 |
| Com_295_pos | FMH           | C20 H27 N5 O | 433.18128 | 4.666 | 434.18851 | Invalid mass | No results    | No results | 692556741.7 | 98305325.95 | 97496667.03 | 98614343.32 | 230942505   | 362902915.1 | 154047138.8 |
| Com_322_pos | 5,6-dimetho   | C18 H16 O5   | 136.0532  | 5.608 | 295.09546 | Invalid mass | No results    | No results | 627591288.4 | 601179336.7 | 667384070.6 | 888488878   | 779842300.3 | 825364627.5 | 465775336.3 |
| Com_371_pos | N-[1-(4-metl  | C13 H19 N O  | 270.15777 | 5.052 | 271.16476 | Invalid mass | No results    | No results | 528443425.5 | 241898470.7 | 286077623.4 | 435085426.6 | 151144339.4 | 505640499.2 | 6952604.392 |
| Com_393_pos | 3-Methoxy pi  | C21 H38 O6   | 368.25271 | 6.665 | 369.25995 | Invalid mass | Invalid mass  | No results | 140034215.6 | 110668194.7 | 193437862.8 | 169795508.7 | 43627029.83 | 45798846.88 | 120665953   |
| Com_402_pos | Diaminopime   | C7 H14 N2 O  | 190.09527 | 1.389 | 191.10274 | No results   | Full match    | No results | 207101964.9 | 294580818.5 | 76420264.73 | 304396083.2 | 385459065.7 | 222467628.5 | 556822321.2 |
| Com_425_pos | RNK           | C16 H32 N8 O | 104.0625  | 6.755 | 105.06982 | Invalid mass | Invalid mass  | No match   | 298025988.3 | 88853196.76 | 237650567.5 | 283539549   | 269245991.4 | 348302327.2 | 290732474.4 |
| Com_441_pos | Styrene       | C8 H8        | 104.06254 | 8.113 | 105.06982 | No results   | No results    | Full match | 192139941.8 | 140185630.9 | 199420482.1 | 158389406.1 | 155113494.6 | 168034494.2 | 311275557.8 |
| Com_464_pos | Norbutorphar  | C16 H21 N O  | 259.15313 | 5.03  | 260.16    | No results   | Invalid mass  | No results | 187789490.2 | 324148087.2 | 218605869.3 | 106455151.3 | 231293253.4 | 146829297.8 | 67098536.8  |
| Com_483_pos | 2-Hydroxy-3-  | C5 H10 O3    | 118.0631  | 1.418 | 119.07022 | No results   | No results    | Full match | 176065494.6 | 269390843.9 | 254720167.9 | 196967172.5 | 221503786.9 | 275170024.7 | 394347966.5 |
| Com_523_pos | Isoferulic    | C10 H10 O4   | 212.06833 | 5.556 | 213.07565 | Invalid mass | Invalid mass  | No results | 135793920.1 | 443082490.5 | 395322687.2 | 268542972.1 | 614499670.3 | 146848796.1 | 202328082.3 |
| Com_551_pos | Glycitein     | C16 H12 O5   | 284.06688 | 5.819 | 285.07416 | Invalid mass | Invalid mass  | No results | 6948510.834 | 226032404   | 183450932.8 | 392455135.5 | 74525677.46 | 34569479.98 | 244732005.3 |
| Com_563_pos | Apocynin      | C9 H10 O3    | 166.06272 | 5.545 | 167.07011 | Full match   | Partial match | Full match | 44239640.63 | 109398863.6 | 107505955.3 | 178015663.3 | 134315666.6 | 76863783.22 | 442732109.6 |
| Com_568_pos | Anacardic ac  | C22 H36 O3   | 360.27704 | 6.127 | 361.28455 | Invalid mass | No results    | No results | 339790886.6 | 144796318.8 | 160851774.8 | 254939469.5 | 281726816.4 | 254875238.5 | 226100436.5 |
| Com_615_pos | Valerophenor  | C11 H14 O    | 162.1041  | 5.549 | 163.11172 | Full match   | No results    | No results | 303880962.4 | 220397222   | 159051043.4 | 463795235.8 | 246914024.5 | 371256735.8 | 213058233.2 |
| Com_662_pos | 3-Hydroxypic  | C6 H5 N O3   | 139.02686 | 3.622 | 140.03413 | Full match   | Not the top h | Full match | 286095436.4 | 11485626.23 | 16731979.14 | 17742590.74 | 74707261.83 | 119057041.3 | 7560968.079 |
| Com_680_pos | Azetidine-2-  | C4 H7 N O2   | 101.04775 | 1.293 | 102.05488 | No results   | No results    | Full match | 240984764.5 | 70616356.11 | 70910037.09 | 57166079.48 | 124746549.5 | 205101097.8 | 87367960.06 |
| Com_702_pos | p-Mentha-1,   | C10 H14      | 134.10936 | 8.113 | 135.11664 | No results   | No results    | Full match | 122888654.4 | 89685392.85 | 108700527.8 | 90846652.21 | 87177811.48 | 92094789.24 | 181629343.7 |
| Com_708_pos | 3-Methylcroi  | C7 H11 N O3  | 157.07387 | 1.415 | 158.08133 | Full match   | No results    | No results | 261710837.2 | 71663333.95 | 91335762.73 | 126232429.1 | 165292318.6 | 172510622.3 | 91840235.13 |
| Com_732_pos | 4-Pregnen-17  | C21 H32 O3   | 332.2349  | 6.599 | 333.2424  | No results   | No results    | Full match | 57522660.64 | 49253048.87 | 139107432.4 | 21937000.84 | 17269049.92 | 7967629.171 | 20363538.41 |
| Com_733_pos | 3-Methoxyber  | C8 H8 O2     | 136.05216 | 5.739 | 137.05937 | Full match   | Not the top h | Full match | 15319721.05 | 24462894.08 | 24820689.81 | 44169541.4  | 28172783.41 | 22627519.81 | 125584641.3 |
| Com_775_pos | 3-amino-2-pl  | C12 H10 N4 O | 242.07992 | 5.824 | 243.08713 | Full match   | No results    | No results | 49152358.58 | 131192759.3 | 20777375.27 | 523331452.4 | 401192279.3 | 221471459.5 | 20408284.76 |
| Com_782_pos | 16,16-Dimetl  | C22 H36 O4   | 386.24533 | 6.85  | 387.25281 | Invalid mass | No results    | No results | 37635630.56 | 17947425.61 | 90566077.52 | 67214932.72 | 18267818.26 | 13995585.82 | 50377029.89 |
| Com_783_pos | DL-Stachydri  | C7 H13 N O2  | 143.09472 | 1.419 | 144.10207 | Full match   | No results    | No results | 15814255.29 | 74147968.62 | 100818644.9 | 69415115.68 | 68045974    | 50743380.24 | 304236647.7 |
| Com_793_pos | 3-methyl-5-   | C13 H17 N O  | 257.10279 | 1.291 | 258.11002 | Invalid mass | No match      | No match   | 231219942.4 | 84195936.16 | 160585536.7 | 259311587.8 | 161510598.7 | 88006979.57 | 125076682.4 |
| Com_797_pos | Sedanolid     | C12 H18 O2   | 176.11991 | 8.115 | 177.1272  | Invalid mass | Invalid mass  | No results | 97430343.51 | 60658955.75 | 89934643.97 | 73268917.52 | 60535987.46 | 69106895.66 | 143069410.2 |
| Com_834_pos | Anandamide    | C22 H37 N O  | 347.28199 | 6.083 | 348.28964 | Full match   | Partial match | No results | 215836564.9 | 82842450.7  | 106984625.2 | 165380924.2 | 169655227.5 | 166824936.1 | 170765192   |
| Com_853_pos | Pregnanetric  | C21 H36 O3   | 358.25007 | 6.845 | 359.25775 | No results   | Invalid mass  | No results | 177650166.7 | 170103598.1 | 274832461.8 | 61094259.63 | 68453073.46 | 70442246.9  | 13562347.74 |
| Com_883_pos | PC (7:0/8:0)  | C23 H46 N O  | 495.29576 | 6.144 | 496.30325 | No results   | Full match    | No results | 200194208.7 | 152735505.1 | 187231241.4 | 287470202.9 | 202246576.7 | 179100510.2 | 265349580.5 |
| Com_885_pos | R-1 Methanar  | C23 H40 N O  | 441.26214 | 5.232 | 442.26926 | Invalid mass | No results    | No results | 6688432.924 | 245774313.6 | 113368026.4 | 134373730.9 | 21017800.05 | 26573402.57 | 264201911.7 |
| Com_894_pos | Cholecalcif   | C27 H44 O    | 384.33469 | 6.275 | 385.34192 | Invalid mass | Invalid mass  | No results | 201594085.8 | 53578474.1  | 74935391.55 | 94145612.19 | 165563996.1 | 189866628.8 | 68709528.14 |
| Com_921_pos | 15-Deoxy-Δ    | C20 H30 O3   | 300.20852 | 8.113 | 301.21545 | Invalid mass | No match      | No match   | 87684654.26 | 58452161.96 | 75904430.13 | 58396905.84 | 51170963.12 | 51542278.18 | 134794872.3 |
| Com_949_pos | 4-[(morphol   | C9 H18 N2 O  | 331.08812 | 1.367 | 332.0954  | Invalid mass | Invalid mass  | No results | 61684495.51 | 290372531.9 | 129978568.4 | 109193812.4 | 75795997.75 | 50348474.67 | 14252677.2  |
| Com_956_pos | 4-oxododecar  | C12 H20 O5   | 133.05593 | 5.564 | 267.11914 | Invalid mass | Invalid mass  | No results | 185201105   | 232709951.5 | 109138343.3 | 362337992.4 | 207311658   | 246137355.8 | 148872351   |
| Com_960_pos | (11E, 15Z)-9, | C18 H32 O5   | 310.21401 | 6.238 | 311.22128 | Invalid mass | No results    | No match   | 184246277.1 | 63269235.46 | 58223683.45 | 126498846.1 | 67292227.14 | 104505604.4 | 144240138.3 |

|              |                   |                    |           |       |           |              |               |            |             |             |             |             |             |             |             |
|--------------|-------------------|--------------------|-----------|-------|-----------|--------------|---------------|------------|-------------|-------------|-------------|-------------|-------------|-------------|-------------|
| Com_981_pos  | 2'-Deoxyadenosine | C10 H13 N5 O       | 273.08464 | 1.374 | 274.091   | Invalid mass | No results    | No results | 128455101.5 | 225263664   | 229514767.5 | 171530020.4 | 222651686   | 125447491.6 | 97862485.77 |
| Com_987_pos  | UR-144            | N-(2-C21 H29 N O)  | 327.21535 | 5.287 | 328.22253 | Invalid mass | No results    | No results | 146985956   | 116411783.3 | 89604621.53 | 65032938.81 | 175932199.8 | 63209662.17 | 78742416.09 |
| Com_1001_pos | IRH               | C18 H32 N8 O       | 446.24261 | 7.314 | 447.25018 | Invalid mass | No results    | No results | 65100446.93 | 71132100.29 | 102305950.2 | 51212453    | 17491461.14 | 52443902.22 | 70542430.83 |
| Com_1007_pos | Simvastatin       | C25 H38 O5         | 418.27141 | 6.701 | 419.27872 | No results   | Full match    | No results | 127469380.3 | 64815163.58 | 96313969.45 | 72335496.94 | 83124732.29 | 113545305.8 | 87221892.03 |
| Com_1013_pos | 1,7-Diphenyl      | C19 H20 O          | 264.14707 | 5.642 | 265.15436 | No results   | Invalid mass  | No match   | 3585626.307 | 5689491.054 | 4016001.079 | 4860330.229 | 3515267.873 | 2916732.727 | 222150776.2 |
| Com_1052_pos | 9-Oxo-ODE         | C18 H30 O3         | 294.21889 | 6.8   | 295.22644 | Full match   | Partial match | Full match | 165441979.3 | 71471225.7  | 98953799.21 | 92181663.36 | 142863773.5 | 110299059.2 | 126273136.1 |
| Com_1094_pos | AKB48             | N-(4-C23 H31 N3 O) | 364.21118 | 5.247 | 365.21811 | Invalid mass | No results    | No results | 20093797.02 | 49182092.52 | 42518744.47 | 7916624.691 | 41506721.64 | 15572867.29 | 10192304.67 |
| Com_1115_pos | 6-Methylquin      | C10 H9 N           | 143.07339 | 5.17  | 144.08044 | Full match   | Partial match | No results | 107415777.3 | 105327304.1 | 98017205.61 | 102003437.1 | 121408307.1 | 188093719.7 | 79317110.34 |
| Com_1157_pos | Isorhapontin      | C15 H14 O4         | 258.08913 | 6.084 | 259.09668 | Full match   | No results    | No results | 72430588.82 | 170822343   | 66266434.43 | 98167593.48 | 90942992.97 | 79414043.64 | 193222785.2 |
| Com_1195_pos | N1-(2,3-dihydro)  | C14 H19 N O        | 249.13649 | 5.027 | 250.14403 | Full match   | No results    | No results | 10367757.61 | 15756470.63 | 12755214.24 | 17683739.77 | 12301081.95 | 12136367.66 | 94407100.86 |
| Com_1198_pos | 3-hydroxy-3-C6    | H10 O5             | 184.0349  | 1.182 | 185.04236 | Invalid mass | No results    | No results | 62582761.61 | 207868477.3 | 178997745.9 | 223919156.3 | 147108474.5 | 161437376.4 | 49736209.63 |
| Com_1225_pos | VLK               | C17 H34 N4 O       | 358.2578  | 5.052 | 359.26517 | Full match   | No results    | No results | 27365232.47 | 107424858.3 | 73409304.5  | 15043595.07 | 48130617.38 | 22983382.86 | 21990323.21 |
| Com_1274_pos | P-Aminohippic     | C9 H10 N2 O        | 194.06925 | 1.422 | 195.07654 | No results   | No results    | Full match | 135421276.4 | 17693923.01 | 22427356.86 | 38286252.51 | 27107718.42 | 199656115.2 | 34168711.96 |
| Com_1283_pos | Tropine           | C8 H15 N O         | 141.11543 | 4.97  | 142.12268 | Full match   | No results    | No results | 9033685.531 | 6771993.439 | 7086912.353 | 4138911.588 | 12301726.57 | 11148751.6  | 7502546.423 |
| Com_1300_pos | 1,4-dihydro       | C19 H36 O4         | 350.24552 | 7.816 | 351.2529  | Invalid mass | No match      | No match   | 132857837.5 | 44919666.4  | 29531312.31 | 24035282.26 | 63841554.73 | 52525245.54 | 54200230.62 |
| Com_1310_pos | LLK               | C18 H36 N4 O       | 372.27336 | 5.215 | 373.28036 | Full match   | No results    | No results | 39551104.72 | 110035854.9 | 69680882.91 | 20878918.37 | 47003720.93 | 48699178.32 | 17330710.75 |
| Com_1325_pos | Coenzyme Q2       | C19 H26 O4         | 318.18274 | 6.693 | 319.19016 | No results   | Full match    | No results | 115269085.6 | 109488937.9 | 97213083.39 | 138844699.9 | 19193733.48 | 99993320.11 | 106580066.9 |
| Com_1366_pos | Ornithine         | C5 H12 N2 O        | 132.08991 | 1.126 | 133.09727 | Full match   | No results    | Full match | 127878227.6 | 35646438.57 | 50398905.74 | 25958069.27 | 51610513.75 | 75679334.65 | 27354505.29 |
| Com_1368_pos | ERH               | C17 H28 N8 O       | 440.21791 | 8.14  | 441.22519 | Invalid mass | No results    | No results | 57041223.84 | 40471269.2  | 51402592.43 | 109697255.3 | 57856758.12 | 53776004.02 | 56477536.34 |
| Com_1384_pos | L-Dopa            | C9 H11 N O4        | 197.06884 | 4.9   | 198.07619 | Full match   | No results    | Full match | 110111080.7 | 74121545.19 | 81972026.99 | 120104940.8 | 105287951.1 | 122103904.2 | 138197617.6 |
| Com_1393_pos | 4-(methylthio)    | C17 H12 N4 O       | 322.08707 | 1.327 | 305.08365 | Invalid mass | No results    | No results | 10101910.31 | 194260104.1 | 95429134.07 | 175000149.9 | 73377444.87 | 25336027.47 | 142364830.6 |
| Com_1397_pos | 2-Arachidonic     | C23 H40 O3         | 369.25522 | 6.69  | 370.2637  | Invalid mass | No results    | No results | 23632925.63 | 60697632.06 | 103517365.8 | 10725479.97 | 78018068.14 | 77262450.54 | 60689021.11 |
| Com_1440_pos | Phenylglyoxy      | C8 H6 O3           | 150.03152 | 1.408 | 168.06538 | No results   | No results    | Full match | 120569956.4 | 97645337.58 | 24254173.12 | 124068298.9 | 152254968.5 | 37681834.62 | 125730410.3 |
| Com_1445_pos | Pyridoxamine      | C8 H12 N2 O        | 168.08752 | 1.2   | 169.09502 | Invalid mass | Invalid mass  | No results | 29750232.7  | 46755478.15 | 38194029.57 | 45646785.04 | 55012643.31 | 34538663.44 | 25486591.99 |
| Com_1466_pos | 2-(2-amino-)      | C14 H20 N2 O       | 264.14707 | 5.202 | 265.15469 | Full match   | Partial match | Full match | 24011427.25 | 77342178.12 | 66625809.72 | 37204496.75 | 43758241.68 | 46894534.52 | 19137712.75 |
| Com_1473_pos | ELK               | C17 H32 N4 O       | 388.23161 | 5.224 | 389.23944 | Full match   | No results    | No results | 33778728.3  | 46913632.4  | 62764714.41 | 35769657.05 | 31452879.2  | 19593923.25 | 40649272.77 |
| Com_1495_pos | Mycophenolic      | C17 H20 O6         | 149.06985 | 1.372 | 321.12872 | Invalid mass | Invalid mass  | No results | 25744456.71 | 27440093.39 | 26990962.77 | 19544238.63 | 28510755.52 | 47633433.53 | 150247853   |
| Com_1501_pos | (+/-)-CP          | 47, C21 H34 O3     | 334.25049 | 8.874 | 335.25778 | No results   | Full match    | No results | 1215823.894 | 172736874.9 | 148371565.8 | 10845576.05 | 37366872.65 | 3689741.747 | 82371775.1  |
| Com_1510_pos | 2-(3,5-dimethyl)  | C13 H14 N2 O       | 246.10016 | 5.283 | 247.10782 | Full match   | No results    | Full match | 98112711.35 | 65966814.44 | 17447961.97 | 174930926.4 | 117814177   | 102121784.5 | 97199641.41 |
| Com_1544_pos | WKK               | C23 H36 N6 O       | 230.13783 | 4.838 | 231.14525 | Invalid mass | No results    | No results | 111188545.1 | 31285590.31 | 43474082.31 | 64239547.88 | 63839826.95 | 110258321.6 | 28730034.43 |
| Com_1546_pos | DL-Leucine        | C6 H14 N2 O        | 130.11051 | 1.419 | 131.11784 | Full match   | No results    | No results | 9368567.517 | 15201075.72 | 33246761.48 | 25822705.25 | 34608203.62 | 23081815.11 | 143732322.7 |
| Com_1550_pos | DLK               | C16 H30 N4 O       | 374.21549 | 5.134 | 375.22128 | Full match   | No results    | No results | 37766997.89 | 39479617.95 | 40407728    | 18554029.95 | 46293121.29 | 33396901.63 | 17613469.33 |
| Com_1572_pos | Dihydrokawai      | C14 H16 O3         | 232.10592 | 1.431 | 233.1134  | Invalid mass | No results    | No results | 108599578.3 | 57450770.99 | 73014964.46 | 54104753.85 | 112010058.7 | 80727914.94 | 64694425.48 |
| Com_1588_pos | 3-(4-hydroxy)     | C10 H12 O4         | 178.06274 | 5.587 | 179.07011 | Invalid mass | No match      | No match   | 16355992.8  | 25964667.18 | 28034770.27 | 39469848.38 | 35818791.3  | 23642637.82 | 56930529.34 |
| Com_1591_pos | VLH               | C17 H29 N5 O       | 367.22201 | 5.051 | 368.22858 | Full match   | No results    | No results | 9016505.756 | 20419602.21 | 13509525.99 | 5521579.486 | 15198979.69 | 7933567.808 | 6097355.3   |

|                                         |           |       |           |              |               |            |             |             |             |             |             |             |             |
|-----------------------------------------|-----------|-------|-----------|--------------|---------------|------------|-------------|-------------|-------------|-------------|-------------|-------------|-------------|
| Com_1612_po: 5-(6-hydroxy)C13 H22 O3    | 208.14607 | 6.739 | 209.15355 | Invalid mass | No results    | No results | 101920658.1 | 22331635.81 | 46066828.32 | 47616242.9  | 43945571.66 | 63323818.06 | 41887156.46 |
| Com_1653_po: L-Hydroxyprc C5 H9 N O3    | 131.0583  | 1.286 | 132.06551 | No results   | No results    | Full match | 103067221.5 | 18550839.1  | 6666159.349 | 22893616.07 | 92881589.36 | 111478235.3 | 54449615.69 |
| Com_1681_po: (±)-Abscisic C15 H20 O4    | 286.12013 | 5.927 | 287.12775 | Invalid mass | Invalid mass  | No results | 101012823   | 62627121.05 | 73204998.03 | 83070784.23 | 73887352.95 | 85076318.99 | 2715910.835 |
| Com_1691_po: Bicine C6 H13 N O4         | 163.08456 | 1.307 | 164.09167 | No results   | Full match    | No results | 100475755.7 | 26066401.04 | 58101227.45 | 49296147.38 | 102184896.3 | 83171554.17 | 66066084.91 |
| Com_1702_po: ethyl 5-met C19 H19 N O    | 309.13954 | 5.256 | 310.14624 | Invalid mass | No results    | No results | 93155846.6  | 42719953.88 | 51532296.14 | 81971182.91 | 79480035.09 | 94605975.62 | 54932293.83 |
| Com_1714_po: THC C21 H30 O2             | 314.22401 | 6.771 | 315.23145 | Full match   | Partial match | Full match | 62778420.77 | 39930768.62 | 66359295.12 | 39459865.45 | 44979217.02 | 30185295.89 | 59035186.43 |
| Com_1715_po: N-(cycloprop C11 H14 N2 O  | 228.06323 | 1.415 | 229.07053 | Invalid mass | No results    | No results | 24915694.69 | 80058920.29 | 53410461.68 | 87341544.29 | 62469518.03 | 33599734.49 | 128023037.3 |
| Com_1720_po: Epitestoster C19 H28 O2    | 288.20821 | 6.716 | 289.21573 | Full match   | Not the top h | Full match | 98602000.36 | 29178133.72 | 39534503.75 | 46693110.54 | 50362405.39 | 68353930.86 | 24400662.93 |
| Com_1724_po: allantoin C4H7N4O4-        | 175.12087 | 1.453 | 176.12828 | No results   | No results    | Full match | 98474037.74 | 47401107.48 | 45655377.33 | 89850503.35 | 40917124.83 | 90444167.17 | 26147919.17 |
| Com_1728_po: SPK C14 H26 N4 O           | 330.19017 | 4.958 | 331.19742 | Full match   | No results    | No results | 33134693.92 | 41504510.71 | 58459854.62 | 20941000.19 | 36549848.78 | 19615904.2  | 13247607.8  |
| Com_1730_po: Testosterone C30 H48 O3    | 456.36001 | 7.313 | 457.36749 | Full match   | Not the top h | No results | 61843589.09 | 109656737.2 | 88364465.21 | 193891192.5 | 72097271.58 | 63082829.74 | 127099789   |
| Com_1747_po: (2R)-2-[(2R, C11 H20 O4    | 216.13585 | 5.826 | 217.14359 | Full match   | No results    | Full match | 97633261.65 | 63555042.51 | 57856529.84 | 136225344.1 | 103953491.1 | 112562969.4 | 78805126.42 |
| Com_1773_po: (12Z)-9,10,1 C18 H34 O5    | 352.22231 | 6.374 | 353.22919 | Invalid mass | Invalid mass  | No results | 41235198.15 | 82115554.56 | 32494986.52 | 78397991.38 | 161423756   | 133377311.2 | 56267912.89 |
| Com_1774_po: MLK C17 H34 N4 O           | 744.43827 | 5.107 | 373.22641 | Invalid mass | No results    | No results | 34129363.56 | 45624370.92 | 30874971.49 | 29385182.35 | 36708078.6  | 43342786.68 | 27187132.86 |
| Com_1794_po: Isoproterenol C11 H17 N O  | 211.12054 | 1.437 | 229.15439 | No results   | No results    | Full match | 6134692.639 | 7532200.449 | 30531125.5  | 8328263.335 | 10533249.93 | 9716054.049 | 5125653.223 |
| Com_1795_po: N-Methylisole C7 H15 N O2  | 145.11047 | 5.143 | 146.11775 | No results   | Full match    | No results | 17267454.92 | 45609692.97 | 123052471.6 | 74967002.31 | 86025026.35 | 51733695.03 | 24422742.49 |
| Com_1800_po: Prolylleucin C11 H20 N2 O  | 228.14747 | 1.453 | 229.15474 | Full match   | No results    | Full match | 6865111.643 | 6820820.59  | 29907642.72 | 7285700.451 | 9526389.124 | 8308255.235 | 4640330.154 |
| Com_1822_po: 6-methyl-4-( C15 H17 N O   | 277.12661 | 1.421 | 278.13348 | Invalid mass | No results    | No results | 93685487.24 | 44980097.53 | 69807101.64 | 82843469.37 | 66513588.5  | 88169951.87 | 55550459.97 |
| Com_1858_po: YLK C21 H34 N4 O           | 404.24576 | 8.169 | 405.25323 | Invalid mass | No results    | No results | 70018849.29 | 58939172.13 | 45956228.98 | 127227266.5 | 56538370.3  | 38540057.86 | 119460977.5 |
| Com_1876_po: 2-methyl-2, C10 H11 N O    | 159.06803 | 5.503 | 160.07518 | Invalid mass | No match      | No results | 54997580.22 | 80186019.2  | 88958421.91 | 158497063.8 | 129548523.1 | 172354424.6 | 100108965.2 |
| Com_1905_po: NPK C15 H27 N5 O           | 339.19052 | 4.883 | 340.19766 | Invalid mass | No results    | No results | 32314450.41 | 54639396.44 | 53036030.19 | 21835249.6  | 61016878.93 | 27989503.42 | 20914910.67 |
| Com_1918_po: Progesterone C21 H30 O2    | 314.22409 | 8.113 | 315.23169 | Full match   | Not the top h | Full match | 46667120.27 | 23007555.79 | 34366831.9  | 21979406.15 | 20988594.73 | 22729984.61 | 62584336.36 |
| Com_1921_po: S-Adenosylm C15 H22 N6 O   | 199.06852 | 1.272 | 399.1442  | Invalid mass | Invalid mass  | No results | 88882317.55 | 5061153.052 | 12414416.01 | 31151996.85 | 27378605.07 | 38745294.04 | 9947255.359 |
| Com_1940_po: LPC 15:1 C23 H46 N O       | 479.30567 | 6.676 | 480.31372 | No results   | Invalid mass  | No results | 40212671.5  | 28113655.75 | 113306907.9 | 68966212.82 | 27139079.23 | 18774682.6  | 28785716.95 |
| Com_1957_po: N-Stearoyl C20 H41 N O     | 204.15137 | 7.309 | 205.15825 | Invalid mass | No results    | No results | 66459062.65 | 51554554.63 | 54103528.4  | 63142473.78 | 62294984.93 | 51521081.04 | 69913670.9  |
| Com_1968_po: 5-(tert-butyl C14 H18 N2 O | 284.11566 | 5.396 | 285.12344 | Invalid mass | No results    | No results | 24645759.71 | 37844848.44 | 59209484.86 | 41441304.4  | 52394565.54 | 26802419.04 | 36645458.11 |
| Com_1985_po: Cortisone C21 H28 O5       | 360.20026 | 5.141 | 361.20767 | Invalid mass | No results    | No results | 30985865.15 | 45443616.43 | 26407845.43 | 30194807.98 | 31181206.99 | 34185873.71 | 26748596.34 |
| Com_2008_po: 2-[5-(2-hyd C10 H18 O4     | 224.1023  | 6.022 | 225.10963 | Invalid mass | Invalid mass  | No results | 84515120.43 | 61410948.87 | 43403832.07 | 92544764.31 | 90496205.72 | 106737659.5 | 49322206.61 |
| Com_2019_po: Piperine C17 H19 N O       | 285.13223 | 1.419 | 286.1398  | Invalid mass | No results    | No results | 57157593.78 | 31696476.09 | 40784366.22 | 62382817.36 | 66830095.95 | 64523651.37 | 108980427.7 |
| Com_2064_po: 3-hydroxy-2- C13 H24 O5    | 242.15142 | 5.807 | 243.15884 | Invalid mass | No results    | No results | 64810848.86 | 49823559.07 | 47477546.59 | 187306193.2 | 79716388.79 | 80151593.6  | 106061890.2 |
| Com_2069_po: mesaconic ac C5 H6 O4      | 130.02669 | 1.883 | 131.034   | No results   | No results    | Full match | 81685797.92 | 9149191.051 | 14147028.85 | 11716701.9  | 26721848.8  | 36808934.9  | 5912015.795 |
| Com_2113_po: RMK C17 H35 N7 O           | 415.24264 | 5.28  | 416.25006 | Invalid mass | No results    | No results | 21381189.11 | 28314190.73 | 18730896.74 | 19011059.73 | 22359709.57 | 19572672.71 | 7407955.22  |
| Com_2260_po: 4-(trifluor C7 H4 F3 N O   | 191.01699 | 1.276 | 192.02417 | Invalid mass | No results    | No results | 17946200.99 | 62654373.41 | 43682296.25 | 65678695.84 | 46543534.24 | 77002623.38 | 3777635.332 |
| Com_2283_po: 5-amino-1-( C7 H7 N5       | 166.02666 | 1.418 | 167.03401 | Invalid mass | No results    | No match   | 72954849.1  | 52089985.19 | 62781654.79 | 97776287    | 84996477.5  | 90755075.37 | 75027453.86 |
| Com_2316_po: 11-Oxoetiocl C19 H28 O3    | 286.19275 | 8.114 | 287.19992 | Invalid mass | Invalid mass  | No match   | 36489235.48 | 21190953.92 | 28503646.98 | 23207477.78 | 23714282.14 | 22835267.22 | 47204622.51 |

|                                             |           |       |           |              |               |            |             |             |             |             |             |             |             |
|---------------------------------------------|-----------|-------|-----------|--------------|---------------|------------|-------------|-------------|-------------|-------------|-------------|-------------|-------------|
| Com_2332_po: 3-pentadecylC22 H38 N2 (       | 362.29262 | 6.284 | 363.30017 | Full match   | No results    | No results | 71272829.67 | 25738849.44 | 28122233.29 | 46891145.19 | 57078186.43 | 62957877.89 | 31922856.7  |
| Com_2372_po: 2-MethoxyberC8 H8 O2           | 136.05237 | 5.489 | 137.05956 | Full match   | Partial match | Full match | 23585489.44 | 34457480.07 | 36258716.66 | 58800129.83 | 31368418.33 | 49898425.96 | 90945580.33 |
| Com_2395_po: CryptotanshiC19 H20 O3         | 296.13723 | 4.872 | 297.14453 | Invalid mass | No results    | No results | 16109131.55 | 55981801.83 | 60639954.17 | 153874428.6 | 51363146.61 | 34914224.61 | 83959052.93 |
| Com_2472_po: WNK C21 H30 N6 (               | 446.23665 | 5.294 | 447.24405 | Invalid mass | No results    | No results | 18576025.99 | 31988480.59 | 21517375.62 | 12675299.28 | 22834151.73 | 20085852.91 | 11659874.82 |
| Com_2489_po: 5 $\alpha$ -Pregnan-C21 H32 O2 | 316.23994 | 7.708 | 317.24713 | Full match   | No results    | Full match | 32141576.58 | 10566889.98 | 11012357.29 | 29750443.5  | 28702379.11 | 15027975.59 | 54432147.78 |
| Com_2538_po: 1-MethyladerC6 H7 N5           | 149.07014 | 1.419 | 150.0775  | Full match   | No results    | No results | 41440358.65 | 27440093.39 | 26990962.77 | 27972043.15 | 42249684.69 | 47633433.53 | 83416692.06 |
| Com_2542_po: 16, 16-DimetlC22 H34 O4        | 384.22952 | 6.618 | 385.23706 | Invalid mass | No results    | No match   | 51140487.31 | 16880162.84 | 82964655.42 | 44141124.93 | 37193478.89 | 43933724.22 | 56937808.32 |
| Com_2543_po: 6-[2-(2H-1, C15 H14 O5         | 274.08381 | 5.728 | 275.0907  | Full match   | Partial match | No results | 4097979.642 | 100121299   | 52314165.8  | 41491247.61 | 22782663.1  | 12382479.92 | 43901292.67 |
| Com_2548_po: N6-Me-dA C11 H15 N5 (          | 265.11617 | 1.356 | 266.1236  | Full match   | No results    | No results | 33567164.63 | 14252208.79 | 28603939.33 | 30046565.01 | 51505829.31 | 34310111.31 | 31727910.34 |
| Com_2576_po: (1E)-5-hydrC19 H20 O2          | 302.12602 | 5.807 | 303.13321 | Invalid mass | No results    | No results | 57029151.39 | 26275924.51 | 24164283.25 | 36275601.65 | 32734008.21 | 41833259.66 | 17019245.5  |
| Com_2624_po: Mesalamine C7 H7 N O3          | 153.04258 | 4.984 | 154.04993 | Full match   | Partial match | Full match | 61263906.1  | 70576827.67 | 49371258.22 | 71403383.22 | 68276598.1  | 67694941.52 | 50268272.6  |
| Com_2627_po: (6E)-7-(2H-1C19 H25 N O3       | 630.35847 | 4.946 | 316.18665 | Invalid mass | No results    | No results | 24972254.9  | 39962803.35 | 34397282.95 | 16320352.97 | 11459636.05 | 21182446.1  | 22612985.57 |
| Com_2638_po: Loxoprofen C15 H18 O3          | 246.12143 | 5.061 | 247.12895 | No results   | Invalid mass  | No results | 10669758.24 | 46685702.08 | 21699735.61 | 9019316.259 | 15310931.54 | 9415554.94  | 7127044.704 |
| Com_2646_po: TestosteronC19 H28 O2          | 288.20834 | 8.115 | 289.21573 | Full match   | No results    | Full match | 29470478.34 | 18011320.99 | 26381288.01 | 22904150.86 | 16399777.9  | 17074703.6  | 40717325.7  |
| Com_2657_po: 13, 14-DihydC20 H36 O5         | 338.24657 | 6.204 | 339.25385 | Invalid mass | No results    | No results | 20961866.85 | 93824361.02 | 16796136.27 | 21376716.59 | 15520197.71 | 21860886.93 | 13960198.65 |
| Com_2673_po: 3-hydroxy-N-C18 H27 N O4       | 377.15389 | 1.349 | 360.15057 | Invalid mass | Invalid mass  | No results | 49316997.66 | 23091323.39 | 77135349.85 | 45183906.38 | 100069921.4 | 54025597.33 | 21709307.86 |
| Com_2683_po: 11-Deoxy prC20 H36 O4          | 362.24545 | 6.369 | 363.25278 | Invalid mass | Invalid mass  | No results | 59464863.55 | 30522528.32 | 13560935.87 | 43112292.96 | 38441289.59 | 44877088.21 | 1632118.788 |
| Com_2700_po: 4-(1H-pyrazC21 H19 N5 (        | 405.1245  | 1.365 | 406.13068 | Full match   | No results    | No results | 19550530.71 | 80130238.22 | 76349517.98 | 28830826.58 | 46754397.88 | 31517793    | 4593132.036 |
| Com_2711_po: 4-(allyloxy)C12 H11 N O3       | 201.07888 | 5.288 | 202.08623 | Full match   | No results    | No results | 26086107.84 | 23881601.8  | 65426969.03 | 79593695.35 | 98502895.61 | 75275730.82 | 22265091.96 |
| Com_2749_po: 2-Benzyl-5-[C16 H21 N3 (       | 271.16434 | 4.927 | 272.1716  | Invalid mass | No results    | No results | 8971930.459 | 9903919.083 | 8281866.714 | 5913676.48  | 11861130.16 | 4445626.805 | 4976604.121 |
| Com_2755_po: Muscone C16 H30 O              | 260.21391 | 8.385 | 261.22125 | No results   | Invalid mass  | No results | 17459617.9  | 57089844.24 | 29827572.09 | 39389962.97 | 48876594.21 | 21593896.06 | 74682410.04 |
| Com_2784_po: 5-(hydroxymC6 H8 O4            | 166.02434 | 1.186 | 167.03154 | Invalid mass | No results    | No results | 25328153.84 | 74160949.91 | 62887890.59 | 111794261.4 | 52753162.24 | 46635997.07 | 20181448.18 |
| Com_2821_po: 1, 3-Dihydro-C13 H15 N O       | 201.11509 | 5.364 | 202.12219 | Full match   | No results    | No results | 10579852.3  | 87121478.36 | 24477392.49 | 17339076.79 | 15189931.7  | 17641933.17 | 40649646.41 |
| Com_2848_po: 6-AminonicotC6 H7 N3 O         | 137.05881 | 1.431 | 138.06616 | No results   | No results    | Full match | 46311397.55 | 26110064.26 | 43201129.47 | 55619505.1  | 61400609.56 | 57569573.46 | 71476563.26 |
| Com_2877_po: 6-(4-phenyl)C16 H24 N2 (       | 276.18372 | 4.627 | 277.19089 | Full match   | No results    | No results | 3317805.174 | 77452995.52 | 43648581.66 | 20926871.83 | 16614257.28 | 17433686.58 | 58424878.25 |
| Com_2880_po: SQH C14 H22 N6 (               | 354.18944 | 5.415 | 355.19708 | Invalid mass | No results    | No results | 16492588.2  | 18890484.66 | 26188043.41 | 23168284.13 | 15182795.38 | 16122370.2  | 21510189.21 |
| Com_2946_po: 1-hydroxy-2-C13 H12 N2 (       | 228.08968 | 5.38  | 229.09738 | Full match   | No results    | No results | 52783336.31 | 37137022.04 | 47003593.66 | 94332114.42 | 71141073.17 | 67290027.32 | 56637706.04 |
| Com_2962_po: ACar 18:1 C25 H48 N O3         | 425.35057 | 7.577 | 426.35803 | No results   | Invalid mass  | No results | 49700955.04 | 81561638.49 | 26922875.55 | 30825650.48 | 31614108.43 | 30749950.77 | 31362362.73 |
| Com_2972_po: 2-ArachidonC23 H38 O4          | 360.26617 | 9.343 | 361.27338 | Invalid mass | Invalid mass  | No results | 14413140.72 | 81279655.55 | 47685208.64 | 7803252.076 | 23654467.04 | 25089304.4  | 6709869.41  |
| Com_3007_po: ProstaglandiC20 H32 O4         | 336.2276  | 6.649 | 337.23508 | No results   | Invalid mass  | No results | 11282684.76 | 9321724.863 | 8803254.342 | 12943568.28 | 28132181.37 | 24707938.85 | 31476796.44 |
| Com_3009_po: ProstaglandiC23 H38 O7         | 408.24863 | 6.845 | 409.25604 | Invalid mass | Invalid mass  | No results | 24881720.38 | 33493270.23 | 66319675.1  | 33115782.04 | 17544512.01 | 14794224.82 | 33583307.31 |
| Com_3011_po: N-[4-hydro)C18 H29 N O3        | 329.19472 | 5.203 | 330.20218 | Invalid mass | No results    | No results | 48095610.22 | 35052532.33 | 39426647.22 | 21527116.3  | 19166206.54 | 25206136.49 | 20926999.54 |
| Com_3048_po: 5, 7-dihydro)C15 H10 O5        | 270.05246 | 5.672 | 271.06009 | Full match   | Partial match | No results | 21287991.35 | 38002140.29 | 65311280.8  | 84697348.04 | 34581964.25 | 32616825.12 | 33957422.76 |
| Com_3056_po: D-Glucose 6-C6 H13 O9 P        | 260.02995 | 1.325 | 261.03738 | Full match   | Not the top h | Full match | 41099260.51 | 27026621.17 | 38258643.91 | 6884856.868 | 84467059.23 | 50778554.28 | 2434434.617 |
| Com_3148_po: Thiamine morC12 H17 N4 (       | 344.07092 | 1.289 | 345.078   | No results   | Full match    | No results | 48344549.5  | 22734579.64 | 48370167.33 | 18100769.11 | 14410115.85 | 54306535.19 | 16608809.03 |



|                          |                |           |       |           |              |               |            |             |             |             |             |             |             |             |
|--------------------------|----------------|-----------|-------|-----------|--------------|---------------|------------|-------------|-------------|-------------|-------------|-------------|-------------|-------------|
| Com_3154_po:MMK          | C16 H32 N4 (   | 390.17484 | 1.328 | 391.18198 | Invalid mass | No results    | No results | 48287662.21 | 12749570.52 | 20065660.21 | 35682618.46 | 48297975.84 | 35802936.02 | 33866782.62 |
| Com_3218_po:N1-(4-methyl | C19 H22 N2 (   | 360.16827 | 5.509 | 361.17548 | Invalid mass | No results    | No results | 18677767.98 | 19561395.8  | 21595906.73 | 30919712.7  | 15711940.6  | 18384878.71 | 49115097.56 |
| Com_3265_po:1-(3-phenyl  | C15 H19 N O    | 261.13248 | 1.274 | 262.13962 | Invalid mass | No results    | No results | 46235956.88 | 14332151.15 | 19354303.51 | 22695086.34 | 44899747.32 | 38944713.67 | 18507625.78 |
| Com_3309_po:SLK          | C15 H30 N4 (   | 346.22149 | 1.413 | 347.22949 | Full match   | No results    | No results | 10642678.51 | 13817632.36 | 22076536.05 | 34616826.73 | 39070311.43 | 19823649.01 | 31277538.19 |
| Com_3318_po:RKK          | C18 H38 N8 (   | 412.29298 | 5.554 | 413.30127 | Invalid mass | No results    | No results | 45425437.24 | 33986296.67 | 37549095.53 | 60060357.19 | 44685170.16 | 52253896.79 | 49311195.17 |
| Com_3341_po:PQH          | C16 H24 N6 (   | 380.18269 | 5.674 | 381.19067 | Full match   | No results    | No results | 45115495.95 | 16447741.67 | 34481844.53 | 39571118.1  | 36408279.42 | 52736022.01 | 15310839.06 |
| Com_3396_po:6β-Oxycodol  | C18 H23 N O    | 333.15352 | 1.378 | 334.16092 | Invalid mass | No results    | No results | 42276940.11 | 7056961.502 | 9172286.696 | 32075508.03 | 6674934.968 | 52267870.1  | 13385064.48 |
| Com_3405_po:Phosphochol  | C5 H14 N O4    | 183.06599 | 6.167 | 184.0735  | No results   | Full match    | No results | 37943076.66 | 26929822.47 | 40473773.92 | 40981144.18 | 42537401.02 | 48350909.55 | 57003837.55 |
| Com_3417_po:Sinapyl alde | C11 H12 O4     | 208.07318 | 5.953 | 209.08009 | No results   | Full match    | Full match | 32270191.59 | 53624821.65 | 48460293.42 | 90729204.92 | 44207355.62 | 48475446.19 | 45891540.44 |
| Com_3462_po:4-(2,3-dihy  | C12 H14 O4     | 204.07833 | 5.564 | 205.08588 | Invalid mass | Invalid mass  | No results | 29908945.85 | 25059869.61 | 26105179.61 | 46628468.01 | 32851065.42 | 30520390.66 | 55674212.22 |
| Com_3513_po:1-[(3S)-3-   | (1C15 H18 N2 ( | 296.1194  | 5.264 | 297.1268  | Invalid mass | No results    | No results | 22283238.97 | 16824837.71 | 12185639.41 | 18331974.22 | 9721018.35  | 18084490.37 | 54604543.85 |
| Com_3528_po:LPK          | C17 H32 N4 (   | 356.24225 | 5.008 | 357.24951 | Full match   | No results    | No results | 16487677.71 | 24738697.34 | 18683570.71 | 12369794.75 | 28210217.06 | 19893881.64 | 9990747.222 |
| Com_3548_po:5-Fluoro-2-  | (C19 H20 F N   | 309.16854 | 4.733 | 310.17584 | Invalid mass | No results    | No results | 22000119.32 | 61154454.69 | 47220621    | 46766052.29 | 44248647.69 | 42536276.86 | 32903559.11 |
| Com_3562_po:Adenosine    | C10 H13 N5 (   | 267.09544 | 1.399 | 268.103   | No results   | Full match    | Full match | 41557243.74 | 18693965.99 | 22606620.59 | 46864718.08 | 35605586.47 | 16122093.47 | 25932638.98 |
| Com_3565_po:α-Linolenoy  | C20 H35 N O    | 321.26673 | 8.701 | 322.27386 | Full match   | No results    | No results | 25129356.17 | 32646132.82 | 35903533.76 | 45989017.01 | 69525054.16 | 31524301.57 | 49100594.84 |
| Com_3584_po:20-Hydroxy   | C20 H34 O6     | 330.23914 | 6.806 | 353.22849 | Invalid mass | Invalid mass  | No results | 41277400.02 | 11637803.44 | 10391716.49 | 19153719.76 | 39959451.51 | 33003536.27 | 29260532.64 |
| Com_3604_po:Maslinic aci | C30 H48 O4     | 494.33754 | 7.853 | 495.34515 | No results   | Invalid mass  | No results | 15765456.5  | 33040222.37 | 25144887.36 | 81394394.04 | 68672710.31 | 20075496.8  | 24509277.8  |
| Com_3656_po:Ergosta-5,7, | C28 H42 O      | 394.32347 | 7.576 | 395.33063 | No results   | No results    | Full match | 40426146.75 | 45112280.1  | 21008955.65 | 23723640.21 | 23779299.24 | 27508652.08 | 21935318.63 |
| Com_3672_po:(±)13-HpOD   | C18 H32 O4     | 294.21884 | 8.176 | 295.22592 | Invalid mass | No match      | No match   | 23573804.14 | 62606064.19 | 19041359.87 | 53323546.48 | 22286861.49 | 15494556.08 | 19287735.75 |
| Com_3731_po:ACar 20:4    | C27 H46 N O    | 447.33496 | 7.243 | 448.34247 | No results   | Invalid mass  | No results | 6659362.983 | 5181331.725 | 5895746.143 | 39289102.96 | 8557463.561 | 577337.998  | 3154527.402 |
| Com_3732_po:13,14-Dihyd  | C20 H30 O4     | 316.20115 | 7.623 | 317.20834 | Invalid mass | No results    | No results | 8668145.589 | 49138276.85 | 14921278.08 | 21606692.96 | 25150845.64 | 12707273.09 | 51042365.25 |
| Com_3741_po:SPH          | C14 H21 N5 (   | 321.14206 | 1.41  | 322.1488  | Invalid mass | No results    | No results | 31013471.18 | 44779996.67 | 42527293.8  | 21569220.24 | 26086483.95 | 31417313.42 | 21464644.61 |
| Com_3763_po:Tetranor-12  | C16 H26 O3     | 248.17722 | 6.379 | 249.18442 | Invalid mass | Invalid mass  | No results | 39051167.91 | 11313515.32 | 13744249.76 | 20876935.74 | 23350879.04 | 23161464.73 | 23855815.81 |
| Com_3782_po:6-(3-hydrox  | C11 H16 O5     | 250.08377 | 5.865 | 251.09113 | Invalid mass | No match      | No results | 852187.977  | 522279.6927 | 759142.5713 | 1189043.367 | 957937.2092 | 837936.6228 | 50293632.08 |
| Com_3794_po:Thromboxane  | C20 H36 O6     | 394.23286 | 6.117 | 395.24017 | Invalid mass | Invalid mass  | No results | 38734344.69 | 33005196.63 | 32788045.32 | 54846616.69 | 35063517.72 | 44342296.67 | 26380640.89 |
| Com_3810_po:17α-Ethynyl  | C20 H24 O2     | 296.17739 | 6.6   | 297.18491 | Full match   | Partial match | Full match | 8651121.501 | 7532182.726 | 21429198.87 | 5081586.306 | 3155444.087 | 2036025.023 | 4437093.716 |
| Com_3839_po:Octopamine   | C8 H11 N O2    | 153.07914 | 5.879 | 154.08643 | No results   | No results    | Full match | 4961617.337 | 4173304.503 | 3651411.185 | 8402571.798 | 6067255.417 | 5532605.63  | 5881184.948 |
| Com_3854_po:Prostaglandi | C20 H34 O5     | 354.23923 | 5.846 | 355.24683 | No results   | No results    | Full match | 38007508.18 | 30791053.15 | 28298522.76 | 57884325.41 | 5545676.933 | 42935396.06 | 33378635.8  |
| Com_3856_po:4-(pentyloxy | C12 H18 N2 (   | 222.13667 | 4.856 | 223.14377 | Full match   | No results    | No results | 37996527.59 | 24680229.13 | 30212712.01 | 48940335.5  | 22221503.3  | 47367744.85 | 5626543.283 |
| Com_3895_po:3,4-Dimethyl | C9 H10 O2      | 150.06795 | 6.771 | 151.07527 | No results   | Full match    | Full match | 26475937.14 | 58078491.47 | 33313019.13 | 59369421.63 | 31158151.44 | 37584768.7  | 29141044.58 |
| Com_3907_po:FLK          | C21 H34 N4 (   | 406.25796 | 5.323 | 407.26544 | Full match   | No results    | No results | 8765026.737 | 18980242.14 | 12542266.99 | 1772324.518 | 12241417.2  | 8567158.049 | 11939571.69 |
| Com_3967_po:INH          | C16 H26 N6 (   | 382.1964  | 5.8   | 383.20316 | Full match   | Invalid mass  | No results | 32139024.78 | 32648945.44 | 34832533.59 | 78101530.94 | 11703511.39 | 55005776.43 | 32464311.42 |
| Com_3973_po:PC (14:0e/3: | C25 H52 N O    | 509.34782 | 9.901 | 510.35474 | No results   | Full match    | Full match | 1256166.464 | 57372477.88 | 8710381.08  | 1947303.241 | 4152840.097 | 2949160.297 | 21260631.49 |
| Com_3999_po:Veratramine  | C27 H39 N O    | 409.29354 | 5.9   | 410.30103 | Invalid mass | No results    | No results | 26818863.18 | 19260892.03 | 24440950.53 | 32930194.81 | 30270834.48 | 28013546.91 | 42660849.71 |
| Com_4038_po:Prostaglandi | C20 H30 O5     | 332.19592 | 7.427 | 333.20322 | Invalid mass | Invalid mass  | No results | 5923285.75  | 55812074.52 | 24770119.41 | 9496266.05  | 13188677.6  | 5269084.856 | 14933873.46 |

|                            |              |           |       |           |              |              |            |             |             |             |             |             |             |             |
|----------------------------|--------------|-----------|-------|-----------|--------------|--------------|------------|-------------|-------------|-------------|-------------|-------------|-------------|-------------|
| Com_4052_po: RMH           | C17 H30 N8 ( | 442.2092  | 5.558 | 443.2168  | Full match   | No results   | No results | 2224460.561 | 3254468.569 | 4018858.862 | 2309856.002 | 3195627.187 | 3186160.604 | 46121760.01 |
| Com_4075_po: 3'-Hydroxyst  | C21 H32 N2 ( | 344.24228 | 4.811 | 345.24939 | Invalid mass | No results   | No results | 10718768.76 | 42801552.78 | 20238373.85 | 6386776.363 | 13382589.3  | 6474334.229 | 10890515.01 |
| Com_4130_po: 3-hydroxy-2-  | C14 H17 N3 ( | 275.127   | 5.207 | 276.13437 | Full match   | No results   | Full match | 11829693.6  | 15262502.84 | 14144021.01 | 9686906.528 | 20251812.77 | 13496525.37 | 8780803.441 |
| Com_4138_po: Naratriptan   | C17 H25 N3 ( | 335.16306 | 5.484 | 336.17026 | Invalid mass | No results   | No results | 4044764.927 | 26001569.59 | 16419063.95 | 28435175.58 | 18643393.54 | 17622425.46 | 44924491.69 |
| Com_4164_po: Dehydroepiari | C19 H28 O2   | 270.19811 | 6.34  | 271.20532 | Invalid mass | Invalid mass | No results | 34354885.84 | 22457836.51 | 31885420.2  | 31193627.4  | 26399551.44 | 34282779.44 | 5941156.956 |
| Com_4175_po: Oleonic ac    | C30 H48 O3   | 439.33399 | 7.31  | 440.33951 | No results   | Invalid mass | No results | 8648534.961 | 44142341.87 | 32569450.58 | 71497256.94 | 29788957.46 | 28372230.79 | 44275135.85 |
| Com_4203_po: 4-oxo-5-pher  | C11 H12 O3   | 174.0678  | 5.487 | 175.07486 | Invalid mass | No results   | No results | 6349936.707 | 6678986.232 | 7428686.891 | 10059742.18 | 7014250.53  | 7588154.466 | 10987444.84 |
| Com_4210_po: 1-Methylxanti | C6 H6 N4 O2  | 166.04889 | 4.889 | 167.05617 | Full match   | No results   | Full match | 896878.595  | 2224917.663 | 1580151.701 | 2002223.389 | 1750243.159 | 1738871.871 | 3634632.406 |
| Com_4285_po: 11-Deoxy pr   | C20 H36 O4   | 322.25069 | 6.418 | 323.25784 | Invalid mass | Invalid mass | No results | 25052477.5  | 22841848.86 | 25881257.04 | 60814755.29 | 34200647.86 | 26723923.75 | 43004367.28 |
| Com_4296_po: 4-(Diethylam  | C11 H15 N O2 | 193.10996 | 5.684 | 194.11765 | Full match   | No results   | No results | 23212806.72 | 21051920.51 | 20740628.88 | 52636748.32 | 34248797.89 | 39944426.06 | 19748396.51 |
| Com_4307_po: 2-(2-hydroxy  | C11 H21 N O2 | 231.14682 | 5.538 | 232.1545  | Full match   | No results   | Full match | 21805709.93 | 27649615.81 | 20682508.64 | 31546606.73 | 36575682.13 | 48735535.01 | 42806355.75 |
| Com_4318_po: 2-(2,6-dime   | C19 H18 O6   | 324.09955 | 5.501 | 325.10699 | Invalid mass | No results   | No results | 32985676.44 | 15030759.97 | 26264850.64 | 8358114.857 | 20144332.59 | 23986883.19 | 6131216.003 |
| Com_4328_po: HMK           | C17 H30 N6 ( | 414.21081 | 5.219 | 415.21762 | Invalid mass | No results   | No results | 8536144.252 | 21467456.28 | 26844988.69 | 21961332.04 | 29453922.71 | 23873504.58 | 16370758.63 |
| Com_4378_po: 6-methyl-7-r  | C9 H9 N O4   | 195.0529  | 1.412 | 196.06009 | Full match   | No results   | No results | 32353630.64 | 35955107.23 | 32509745.23 | 38633652.78 | 38736059.17 | 36285393.21 | 28746765.46 |
| Com_4543_po: 4-(3,4-dime   | C12 H15 N3 ( | 233.11618 | 5.154 | 234.1236  | Full match   | No results   | No results | 24238328.66 | 19128507.31 | 22290571.35 | 72185003.34 | 26794972.48 | 42009378.77 | 31996338.57 |
| Com_4587_po: Norfloxacin   | C16 H18 F N2 | 319.1379  | 1.371 | 320.14514 | Invalid mass | Invalid mass | No results | 23707964.53 | 29533138.53 | 5652328.816 | 22707933.32 | 20769519.05 | 32820384.27 | 21180639.58 |
| Com_4591_po: Alprazolam-c  | C17 H5 [2]H2 | 316.13785 | 1.415 | 317.1456  | Invalid mass | No results   | No results | 30447338.64 | 16842778.14 | 20699618.25 | 34739317.85 | 26276518.9  | 32212067.86 | 23132618.38 |
| Com_4622_po: 4-{3-[(3,4-   | C18 H22 O4   | 341.15854 | 1.419 | 342.16577 | Invalid mass | No results   | No results | 30100174.51 | 10384467.92 | 17201863.17 | 27415147.87 | 21982108.47 | 25218243.54 | 28913540.35 |
| Com_4642_po: ACar 18:2     | C25 H46 N O2 | 441.34522 | 7.228 | 442.35324 | No results   | Invalid mass | No results | 5935482.945 | 34865552.82 | 21734635.15 | 9901763.841 | 10458426.26 | 10074033.51 | 20281463.78 |
| Com_4646_po: VMK           | C16 H32 N4 ( | 358.20336 | 4.941 | 359.21063 | Invalid mass | No results   | No results | 14475223.81 | 18168229.16 | 10998051.26 | 4917916.5   | 15515258.98 | 9445651.455 | 3210684.711 |
| Com_4651_po: IMK           | C17 H34 N4 ( | 390.22803 | 5.062 | 391.23474 | Invalid mass | No results   | No results | 9793418.479 | 16295754.85 | 6999732.508 | 2451908.849 | 12014971.61 | 6223932.091 | 5402537.873 |
| Com_4653_po: N1-isopropyl  | C16 H17 N O  | 271.10297 | 4.86  | 272.11041 | Full match   | No results   | No results | 9277296.544 | 5554865.31  | 18778179.56 | 2718303.359 | 12157980.85 | 20161531.58 | 426056.6091 |
| Com_4705_po: Etiocholanol  | C19 H30 O2   | 272.21393 | 9.115 | 273.2211  | Invalid mass | Invalid mass | No results | 9642193.614 | 16878272.35 | 24945460.9  | 46910870.54 | 49444061.65 | 10122819.21 | 27784858.74 |
| Com_4745_po: Pilocarpine   | C11 H16 N2 ( | 208.12131 | 5.086 | 209.12859 | No results   | Full match   | No results | 29232947.09 | 20729196.18 | 21839651.56 | 51089007.92 | 31974329.33 | 39252143.06 | 33215492.04 |
| Com_4778_po: tetranor-12   | C16 H26 O3   | 248.17731 | 8.462 | 249.18457 | Invalid mass | Invalid mass | No results | 28967247.67 | 20997841.28 | 17962616.22 | 35344073.1  | 20113668.01 | 25961013.16 | 15439987.52 |
| Com_4893_po: N6-Isopente   | C15 H21 N5 ( | 335.15933 | 5.836 | 336.16669 | No results   | Full match   | No results | 28085920.35 | 7454692.702 | 6042397.417 | 2176356.187 | 18719524.58 | 4163883.386 | 5401794.851 |
| Com_4923_po: Jasmone       | C11 H16 O    | 182.13075 | 6.286 | 183.13832 | Invalid mass | No results   | No results | 25527159.47 | 20392160.94 | 17095960.49 | 54807374.89 | 17951576.9  | 34651332.49 | 36107926.38 |
| Com_4935_po: N2-(2-cyano-  | C12 H6 F2 N2 | 264.01587 | 1.262 | 265.02313 | Full match   | No results   | No results | 11712989.86 | 6441350.443 | 13465110.85 | 24644407.5  | 15206283.64 | 11278751.4  | 36035488.64 |
| Com_4950_po: TLK           | C16 H32 N4 ( | 360.23709 | 4.779 | 361.24448 | Full match   | No results   | No results | 10633305.63 | 43022688.37 | 24201545.41 | 5464093.228 | 17293997.85 | 10466345.55 | 8605669.973 |
| Com_4962_po: Ecgonine      | C9 H15 N O3  | 185.1049  | 5.64  | 186.11244 | Full match   | No results   | No results | 13743740.76 | 8752894.668 | 10331140.76 | 24333830.37 | 12888458.98 | 16686974.84 | 32012533.52 |
| Com_4986_po: DL-2-(acetyl  | C11 H13 N O2 | 224.11602 | 1.317 | 225.12306 | Invalid mass | No results   | No results | 27411116.25 | 13073325.32 | 16313032.85 | 14928636.66 | 29846352.32 | 27316791.92 | 19879245.74 |
| Com_5070_po: N6-Methylad   | C6 H7 N5     | 149.07015 | 2.521 | 150.07741 | Full match   | No results   | No results | 19792946.55 | 9897065.338 | 16978661.46 | 14550240.76 | 12731853.83 | 26161715.93 | 14747635.69 |
| Com_5093_po: EMH           | C16 H25 N5 ( | 397.14851 | 4.914 | 398.15582 | Invalid mass | No results   | No results | 879563.7374 | 823041.4641 | 5330510.565 | 2024455.346 | 3978809.029 | 3449339.378 | 3386688.99  |
| Com_5101_po: 2-Thio-acety  | C21 H42 O3   | 396.26588 | 6.509 | 397.27347 | Invalid mass | No results   | No results | 8783807.519 | 6846608.808 | 9524816.33  | 13579752.1  | 5153607.041 | 6579201.932 | 6696395.063 |
| Com_5123_po: (2R,3S,4S,5   | C14 H20 O6   | 284.12574 | 6.415 | 285.13321 | Full match   | No results   | No results | 15037383.16 | 41051284.73 | 29927224.14 | 25754670.48 | 19219577.01 | 24834809.78 | 16665655.87 |

|                                           |           |        |           |              |               |            |             |             |             |             |             |             |             |
|-------------------------------------------|-----------|--------|-----------|--------------|---------------|------------|-------------|-------------|-------------|-------------|-------------|-------------|-------------|
| Com_5125_po: 11 (Z), 14 (Z), C20 H34 O2   | 306.25595 | 6.058  | 307.26321 | Full match   | Not the top h | Full match | 20661325.48 | 14723840.73 | 16617384.6  | 57892261.67 | 19507369.85 | 20482661.88 | 34100616.98 |
| Com_5137_po: 4-amino-6-cl C9 H7 C1 N4     | 200.04503 | 1.605  | 201.05232 | Invalid mass | No results    | No results | 10414617.07 | 13306349.15 | 21326018.02 | 5469991.574 | 18348442.85 | 18612654.19 | 4572139.152 |
| Com_5140_po: 5-allyl-4, 6-C11 H12 N2 (    | 188.09432 | 5.769  | 189.10179 | Full match   | Partial match | No results | 335142.3614 | 701014.0746 | 512066.5926 | 1342322.145 | 1649401.951 | 644098.1323 | 811930.8271 |
| Com_5153_po: (9cis)-Retir C20 H28 O       | 284.21382 | 7.703  | 285.22107 | Full match   | Not the top h | Full match | 13125667.92 | 9500347.794 | 10423078.58 | 10572534.36 | 8578848.855 | 5784446.155 | 23954013.65 |
| Com_5175_po: ANK C13 H25 N5 (             | 331.18526 | 4.802  | 332.19266 | Full match   | No results    | No results | 12023574.02 | 15788402.54 | 16107538.18 | 18025091.23 | 12444408.39 | 14709204.61 | 33735146.03 |
| Com_5184_po: (3R)-8-hydr C16 H14 O4       | 252.07451 | 4.691  | 253.08165 | Invalid mass | No results    | No results | 25990762.11 | 8643227.481 | 13726971.65 | 15706444.11 | 11941037.44 | 16776297.54 | 6162358.653 |
| Com_5238_po: N-(6-methoxy C11 H10 N2 (    | 234.04967 | 1.213  | 235.05695 | Invalid mass | No results    | No results | 1861593.83  | 16683836.95 | 5678081.841 | 7769236.212 | 9459711.48  | 4819518.513 | 2801662.752 |
| Com_5248_po: 4'-Methoxy C9 H10 O2         | 150.06796 | 9.5    | 151.07529 | Full match   | Partial match | Full match | 20523310.41 | 17376338.78 | 8548456.493 | 19049753.21 | 8476383.862 | 14311622.79 | 14799168.84 |
| Com_5272_po: Avocadyne 1-C19 H34 O4       | 308.2349  | 7.973  | 309.24213 | Invalid mass | No results    | No results | 7847200.679 | 34644258.02 | 20387515.03 | 15416090.13 | 21561386.26 | 9463920.682 | 32975757.73 |
| Com_5277_po: N' 1-(3, 4, 5-t C19 H22 N2 ( | 358.15076 | 5.746  | 359.15994 | Invalid mass | No results    | No results | 16971863.15 | 14620487.51 | 8807544.628 | 19362179.92 | 21879044.89 | 16012803.01 | 9677160.597 |
| Com_5332_po: Taurodeoxy C26 H45 N O6      | 481.28694 | 11.852 | 482.29422 | Invalid mass | No results    | No results | 974929.8673 | 1200171.293 | 724332.2092 | 2516066.079 | 949750.4006 | 1094599.111 | 1297870.899 |
| Com_5350_po: 1-(4-hydroxy C9 H12 O3       | 150.06795 | 8.06   | 151.07538 | Invalid mass | No match      | No match   | 21409223.31 | 38808375.05 | 16489209.8  | 33161122.6  | 11354558.51 | 21178881.16 | 22037269.9  |
| Com_5352_po: 4-methoxy-6-C11 H12 O3       | 192.07846 | 5.263  | 193.08585 | Full match   | Partial match | No results | 16205644.57 | 13310091.22 | 11440453.63 | 21725117.8  | 13025518.83 | 16297314.11 | 32239466.61 |
| Com_5401_po: N', N''-di C17 H16 N6 (      | 384.11931 | 5.613  | 385.12762 | Full match   | No results    | No results | 11658399.82 | 9199090.889 | 11036871.62 | 29876419.93 | 18481427.02 | 13866784.48 | 17309089.74 |
| Com_5434_po: Estriol C18 H24 O3           | 288.17189 | 5.683  | 289.17935 | Full match   | No results    | Full match | 24417904.72 | 18098412.11 | 20563353.98 | 44043634.92 | 25011093.86 | 27325527.69 | 25133616.65 |
| Com_5519_po: α-Estradiol C18 H24 O2       | 272.17349 | 5.265  | 273.18073 | Invalid mass | No results    | No results | 21835904.44 | 17555750.9  | 18976776.01 | 39722395.54 | 25179940.28 | 29405492.17 | 30946029.59 |
| Com_5537_po: L-Methionine C6 H13 N O2     | 163.0668  | 4.78   | 164.07408 | No results   | No results    | Full match | 4966467.252 | 6707998.695 | 30644136.1  | 26899279.68 | 20374107.11 | 14334424.42 | 2009615.009 |
| Com_5578_po: O-Desmethyl C13 H12 O3       | 216.07805 | 1.22   | 217.08533 | No results   | No results    | Full match | 565865.6546 | 18311454.37 | 4019991.494 | 9435763.755 | 4747866.158 | 1641809.17  | 1687701.103 |
| Com_5604_po: 4-Hydroxypr C16 H21 N O6     | 137.57411 | 1.248  | 138.58134 | Invalid mass | No results    | No results | 13063011.35 | 8552658.723 | 8119980.969 | 11659106.2  | 7284992.5   | 26067463.4  | 10132600.09 |
| Com_5630_po: 2-(2'-fluor C22 H18 F N      | 331.13762 | 1.416  | 332.14401 | Full match   | Invalid mass  | No results | 20435557.62 | 16702939.33 | 18754518.16 | 24991986.64 | 23095010.91 | 21050829.5  | 17177570.5  |
| Com_5631_po: Enrofloxacin C19 H22 F N6    | 341.14889 | 4.971  | 342.15604 | Invalid mass | No results    | No results | 3259079.547 | 6823139.556 | 5083670.514 | 4989940.608 | 5626305.093 | 5336295.803 | 4563839.456 |
| Com_5649_po: L-Homocitru C7 H15 N3 O6     | 189.11145 | 1.412  | 190.11868 | No results   | No results    | Full match | 9895656.127 | 9228442.679 | 13086971.74 | 33329554.19 | 19152970.4  | 18796169.13 | 22557096.92 |
| Com_5676_po: NNK C14 H26 N6 (             | 352.21198 | 5.124  | 353.21893 | Invalid mass | No results    | No results | 2602372.776 | 2287189.221 | 3203861.051 | 4980952.325 | 3707680.997 | 3783767.042 | 5451629.207 |
| Com_5689_po: VNK C15 H29 N5 (             | 359.21691 | 1.407  | 360.22443 | Full match   | No results    | No results | 3537948.867 | 4284882.206 | 3251301.633 | 2016236.813 | 4584689.533 | 2644950.134 | 1979174.075 |
| Com_5691_po: 1-(3, 5-dime C10 H16 N2 (    | 244.08408 | 5.319  | 245.09137 | Invalid mass | Invalid mass  | No results | 20823796.77 | 13203200.65 | 14880303.4  | 38081944.05 | 24351292.48 | 33720128.96 | 29614931.28 |
| Com_5708_po: Sunitinib C22 H27 F N6       | 207.09001 | 5.381  | 437.16925 | Invalid mass | No results    | No match   | 3636982.118 | 8024002.947 | 8205212.773 | 23622849.62 | 7564977.804 | 2236268.528 | 27740432.92 |
| Com_5784_po: α-Lapachone C15 H14 O3       | 264.07448 | 5.273  | 265.08234 | Invalid mass | No results    | No results | 22291632.42 | 12580194.05 | 17245051.08 | 37809423.73 | 24944718.45 | 30148923.59 | 25397960.7  |
| Com_5848_po: Meperidine C15 H16 [2]H      | 252.18731 | 6.336  | 253.19429 | Invalid mass | No results    | No results | 21923821.63 | 11980310.59 | 13751496.36 | 14290629.45 | 15473998.38 | 21005430    | 2122683.02  |
| Com_5867_po: EQH C16 H24 N6 (             | 394.15649 | 5.719  | 395.164   | Invalid mass | No results    | No results | 21871234.13 | 363699.2233 | 379458.7376 | 1417798.979 | 1691064.731 | 5972669.293 | 693031.2486 |
| Com_5883_po: Cafestol C20 H28 O3          | 316.20315 | 5.901  | 317.21066 | Full match   | Not the top h | Full match | 21099052.55 | 14548120.5  | 15155791.76 | 30206999.01 | 19739042.21 | 22555341.06 | 28228062.62 |
| Com_5891_po: 2'-Deoxyguar C10 H13 N5 (    | 267.09648 | 4.615  | 268.10358 | No results   | Full match    | Full match | 16196817.25 | 6458350.586 | 10400449.07 | 5030891.059 | 10378122.08 | 7380514.442 | 20982376.44 |
| Com_5915_po: 5'-Deoxy-5'- C11 H15 N5 (    | 297.08903 | 1.269  | 298.09607 | No results   | No results    | Full match | 21672587.75 | 522625.1459 | 1351299.151 | 477014.9108 | 4861317.28  | 6582557.48  | 1483199.044 |
| Com_5948_po: Prostaglandi C20 H32 O5      | 352.222   | 7.063  | 353.22928 | No results   | Invalid mass  | No results | 21457701.12 | 10414410.57 | 8582447.018 | 12437522.37 | 31432421.59 | 25717837.01 | 10876781.76 |
| Com_5960_po: 2-Phenyleth C8 H11 N         | 121.08916 | 5.055  | 122.09636 | No results   | No results    | Full match | 21334701.9  | 7360826.046 | 9724764.105 | 5165390.596 | 13272128.81 | 31495397.61 | 7041087.176 |
| Com_5981_po: Celestolide C17 H24 O        | 266.1671  | 6.756  | 267.17447 | Invalid mass | No results    | No results | 18644124.84 | 9874521.108 | 19091769.16 | 10764547.36 | 14952657.73 | 18721494.48 | 12921194.79 |

|                                                                   |               |           |       |           |              |               |            |             |             |             |             |             |             |             |
|-------------------------------------------------------------------|---------------|-----------|-------|-----------|--------------|---------------|------------|-------------|-------------|-------------|-------------|-------------|-------------|-------------|
| Com_5985_po: WLH                                                  | C23 H30 N6 (  | 218.11444 | 5.391 | 437.23593 | Invalid mass | No results    | No results | 21213959.59 | 12876494.06 | 14542254.07 | 17109528.72 | 15506013.77 | 12328817.08 | 14808511.85 |
| Com_6024_po: D- $\delta$ -Tocopherol                              | C27 H46 O2    | 402.34549 | 6.049 | 403.35333 | Invalid mass | No results    | No results | 21029991.3  | 7171409.052 | 11274386.43 | 11563962.12 | 14289462.62 | 21507054.62 | 10732910.28 |
| Com_6077_po: 1-(3-ethyl-1H-imidazol-2-yl)ethane                   | C13 H18 O4    | 220.10982 | 5.778 | 221.11743 | Invalid mass | No results    | No results | 20814431.95 | 9999501.659 | 12284799.69 | 43280028.92 | 16864988.63 | 20138180.88 | 16584375.7  |
| Com_6167_po: All trans-retene                                     | C20 H28 O     | 284.21373 | 6.723 | 285.22125 | No results   | No results    | Full match | 20389621.86 | 9837742.989 | 14804109.34 | 19413508.38 | 16569340.06 | 17335923.75 | 11536036.96 |
| Com_6179_po: (+/-)-11(12)-C20 H34 O4                              |               | 360.22967 | 7.446 | 361.23669 | Invalid mass | No results    | No results | 15667033.96 | 31687961.91 | 18732361.94 | 11546960.76 | 13908847.15 | 17813634.85 | 11764733.3  |
| Com_6235_po: WNH                                                  | C21 H25 N7 (  | 455.2005  | 4.784 | 456.20764 | Invalid mass | No results    | No results | 3784953.031 | 8181417.889 | 25895552.21 | 8175920.355 | 14259523.5  | 8830602.284 | 1776785.901 |
| Com_6246_po: 1-(4-benzyl-1H-imidazol-2-yl)ethane                  | C19 H24 N4 (  | 324.19134 | 6.369 | 325.19861 | Invalid mass | No results    | No results | 20027519.01 | 9708396.188 | 9924797.217 | 20344454.19 | 12405114.58 | 15460869.73 | 11958456.9  |
| Com_6255_po: L-Histidinol                                         | C6 H11 N3 O   | 141.09035 | 1.149 | 142.09747 | No results   | No results    | Full match | 10379173.16 | 6966392.945 | 6937817.444 | 14166935.26 | 13875301.85 | 19755939.61 | 17323089.12 |
| Com_6279_po: SMK                                                  | C14 H28 N4 (  | 346.1746  | 5.062 | 347.18158 | Invalid mass | No results    | No results | 3187188.918 | 18512126    | 16836468.42 | 46467414.55 | 32258875.56 | 14711088.17 | 9914246.837 |
| Com_6280_po: PNK                                                  | C15 H27 N5 (  | 169.59543 | 4.798 | 170.60265 | Invalid mass | No results    | No results | 14147790.46 | 16526234.7  | 21737784.5  | 2483455.979 | 13399686.61 | 6277932.286 | 1595245.067 |
| Com_6293_po: EMK                                                  | C16 H30 N4 (  | 406.18745 | 5.232 | 407.19485 | Full match   | No results    | No results | 911806.4681 | 6837985.372 | 3347791.761 | 2383280.562 | 4008355.048 | 3450812.231 | 3356740.106 |
| Com_6302_po: 2,6-Dihydro-2H-pyridin-4(1H)-one                     | C5 H4 N4 O2   | 152.03325 | 4.925 | 153.04053 | No results   | No results    | Full match | 11567952.67 | 4015428.175 | 5421775.875 | 30614412.62 | 6013711.287 | 4974704.437 | 1322841.188 |
| Com_6303_po: 1,7-bis(3,4-dihydroxyphenyl)ethane                   | C19 H22 O5    | 347.16886 | 1.45  | 348.17603 | Invalid mass | No results    | No results | 7836382.975 | 7403199.533 | 6880167.562 | 11181584.24 | 6597291.779 | 8001934.657 | 11748097.07 |
| Com_6358_po: RNH                                                  | C16 H27 N9 (  | 447.19711 | 4.912 | 448.20499 | Invalid mass | No results    | No results | 18811805.04 | 6713365.607 | 7779999.736 | 4603667.722 | 8193892.77  | 13634543    | 9376996.173 |
| Com_6368_po: TMK                                                  | C15 H30 N4 (  | 378.2006  | 4.79  | 379.20703 | Invalid mass | No results    | No results | 7108703.687 | 11809413.57 | 8549532.398 | 17071220.98 | 9483299.2   | 10396482.92 | 9384663.447 |
| Com_6478_po: Mirtazapine                                          | C17 H16 N2    | 268.18219 | 5.868 | 269.1897  | Invalid mass | No results    | No results | 10551790.85 | 13146483.46 | 12332690.61 | 31494974.7  | 13419438.28 | 12184653.58 | 22386604.57 |
| Com_6495_po: 6,6-dimethyl-1,2,3,4-tetrahydro-2H-pyridin-4(1H)-one | C12 H19 N S2  | 241.09494 | 4.703 | 242.1021  | Full match   | No results    | No results | 18963439.87 | 7491927.38  | 9257451.064 | 12022446.25 | 3910117.257 | 14024531.01 | 3435020.282 |
| Com_6496_po: Pentadecanoic acid                                   | C15 H30 O2    | 259.25086 | 6.37  | 260.25818 | Invalid mass | No results    | No results | 18952896.54 | 4962527.053 | 5892936.645 | 7121708.486 | 14725391.95 | 15476018.15 | 1359934.151 |
| Com_6530_po: ALK                                                  | C15 H30 N4 (  | 330.22651 | 4.886 | 331.2337  | Full match   | No results    | No results | 10543587.74 | 10370049.45 | 7791110.641 | 9411067.722 | 15869348.88 | 11425849.32 | 1620634.432 |
| Com_6557_po: Methyl Palmic acid                                   | C17 H34 O2    | 287.28125 | 6.798 | 288.28787 | Invalid mass | No results    | No results | 18698833.64 | 5937444.063 | 7156702.446 | 4682517.835 | 15459563.17 | 12443766.27 | 3929820.777 |
| Com_6622_po: 5-Phenylvaleric acid                                 | C11 H14 O2    | 178.0991  | 8.115 | 179.1067  | No results   | No results    | Full match | 12200320.38 | 10336589.56 | 10178558.77 | 8594979.413 | 8736070.842 | 9163903.026 | 16521102.48 |
| Com_6655_po: 4-(cyclohexyl)butanoic acid                          | C15 H18 N2 (  | 296.10026 | 4.809 | 297.10806 | Invalid mass | No results    | No results | 9569113.282 | 1124632.155 | 1427440.52  | 1969815.296 | 1603223.355 | 5849780.657 | 1072307.56  |
| Com_6678_po: 2,6-Di-tert-butyl-4-methylphenol                     | C14 H20 O2    | 220.14531 | 7.108 | 221.15259 | No results   | Full match    | No results | 16536090.3  | 4948548.493 | 9288220.142 | 12120868.05 | 8952822.1   | 10335115.25 | 11403433.2  |
| Com_6709_po: Gentisic acid                                        | C7 H6 O4      | 154.02655 | 1.425 | 155.03378 | No results   | No results    | Full match | 18086060.22 | 10852316.26 | 11795012.11 | 11623870.29 | 27597573.48 | 18556532.57 | 6129482.857 |
| Com_6719_po: ENK                                                  | C15 H27 N5 (  | 389.19417 | 5.153 | 390.20303 | Invalid mass | No results    | No results | 10472720.81 | 10159964.32 | 18655396.69 | 3376317.599 | 2235334.58  | 8553085.499 | 13708984.2  |
| Com_6837_po: 2-(2-oxo-2-phenylacetyl)propane                      | C10 H16 N2 (  | 321.2052  | 4.963 | 322.21234 | Invalid mass | No results    | No results | 10762105.62 | 10428737.52 | 11159688.2  | 20349048.14 | 11397476.21 | 13525913.26 | 18339285.85 |
| Com_6896_po: 2-[1-oxophthalimido]acetic acid                      | C15 H12 N2 (  | 338.01379 | 1.271 | 339.02121 | Invalid mass | No results    | No results | 2136107.08  | 22686465.81 | 11842586.23 | 5419427.207 | 6964248.635 | 7653005.175 | 1242881.398 |
| Com_6975_po: LysoPE 18:2                                          | C23 H44 N O2  | 477.28506 | 6.551 | 478.29242 | No results   | No results    | Full match | 12657309.73 | 4157335.804 | 6227773.492 | 12878732.21 | 7456365.135 | 5245456.343 | 9751898.07  |
| Com_7053_po: Sphingosine                                          | C18 H37 N O2  | 299.28186 | 6.802 | 300.28891 | Full match   | Partial match | Full match | 6504526.355 | 6778066.528 | 3543191.093 | 3870594.47  | 16835009.1  | 13192555.7  | 8724377.344 |
| Com_7084_po: 3-(4-methylphenyl)propanoic acid                     | C20 H21 N5    | 314.15875 | 1.406 | 315.16577 | Invalid mass | No results    | No results | 16917192.65 | 9269910.09  | 9499176.459 | 26231832.69 | 19937427.59 | 19710625.56 | 12241139.38 |
| Com_7086_po: PC (18:2e/2:C28 H54 N O2)                            |               | 547.36344 | 9.95  | 548.3703  | No results   | Full match    | Full match | 2311459.084 | 26336670.53 | 7046634.858 | 2199810.255 | 4018290.092 | 4981539.618 | 11088809.42 |
| Com_7128_po: Biliverdin                                           | C33 H34 N4 O2 | 582.24738 | 6.308 | 583.25507 | No results   | Full match    | No results | 2530678.047 | 26070338.92 | 7899562.918 | 19537814.58 | 10744119.36 | 2387110.81  | 12999421.85 |
| Com_7165_po: GLK                                                  | C14 H28 N4 (  | 316.2108  | 4.794 | 317.21808 | Full match   | No results    | No results | 5111107.67  | 10204031.16 | 6183792.021 | 3208841.31  | 7497056.343 | 3584232.396 | 3694536.923 |
| Com_7166_po: All trans-retene                                     | C20 H28 O     | 284.21361 | 6.824 | 285.22107 | No results   | Full match    | Full match | 12210577.5  | 7169798.104 | 12514888.85 | 7539817.132 | 7833238.898 | 8109945.773 | 7674340.541 |
| Com_7250_po: APK                                                  | C14 H26 N4 (  | 336.17937 | 5.129 | 337.18655 | Invalid mass | No results    | No results | 2048091.935 | 4094738.678 | 4882703.293 | 5476690.96  | 3767797.953 | 6479016.46  | 6067096.837 |

|                           |              |           |       |           |              |               |             |             |             |             |             |             |             |             |
|---------------------------|--------------|-----------|-------|-----------|--------------|---------------|-------------|-------------|-------------|-------------|-------------|-------------|-------------|-------------|
| Com_7253_po: 4-(4-nitropl | C12 H10 N4 ( | 264.06191 | 5.843 | 265.06882 | Invalid mass | No results    | No results  | 4887574.176 | 5270422.899 | 3192514.775 | 27039682.46 | 27295318.5  | 17342440.85 | 4174823.798 |
| Com_7261_po: SNK          | C13 H25 N5 ( | 347.18448 | 5.189 | 348.19217 | Invalid mass | No results    | No results  | 13027509.76 | 7682474.734 | 7211846.905 | 29391719.15 | 15736038.24 | 25408513.99 | 18870437.98 |
| Com_7267_po: N-(2,3-dihy  | C15 H15 N O  | 273.09967 | 5.445 | 274.10648 | Full match   | No results    | No results  | 15925666.74 | 11515953.82 | 15184253.56 | 33101748.13 | 19370505.78 | 23075278.68 | 17024722.27 |
| Com_7308_po: 3-(3,4,5-tri | C12 H16 O5   | 262.08354 | 5.616 | 263.09082 | Invalid mass | No results    | No results  | 3718161     | 7380215.625 | 8707123.124 | 11550218.35 | 6447016.444 | 5594514.51  | 20831700.48 |
| Com_7392_po: 13-OxoODE    | C18 H30 O3   | 316.20366 | 6.565 | 317.21106 | Invalid mass | No match      | No match    | 15837883.37 | 18822726.13 | 6689697.7   | 10363419.44 | 5130914.431 | 6148949.316 | 13689945.74 |
| Com_7396_po: 1-morpholin  | C13 H18 N2 ( | 282.1216  | 5.088 | 283.12894 | Full match   | No results    | No results  | 15833094.41 | 10500693.11 | 13435599.01 | 26329479.68 | 15750012.67 | 18232196.71 | 15191989.87 |
| Com_7406_po: YMK          | C20 H32 N4 ( | 422.19231 | 5.477 | 423.19958 | Invalid mass | No results    | No results  | 3464151.568 | 5625671.021 | 3283478.256 | 6668121.004 | 4069225     | 4069672.281 | 2525886.539 |
| Com_7417_po: 1,3-bis(4-me | C26 H30 N2 ( | 402.23878 | 6.861 | 403.24609 | Invalid mass | No results    | No match    | 10586729.59 | 19122679.2  | 20366353.68 | 20679573.32 | 21629649.81 | 23355088.01 | 3606514.771 |
| Com_7428_po: VMH          | C16 H27 N5 ( | 385.17777 | 5.809 | 386.18542 | Full match   | No results    | No results  | 4102005.567 | 2862279.83  | 6999446.753 | 2282854.836 | 2579016.887 | 6592122.613 | 4416883.74  |
| Com_7463_po: 2-([4-(6-me  | C21 H16 N2 ( | 344.1035  | 5.309 | 345.11087 | Invalid mass | No results    | No results  | 6999418.516 | 7253166.35  | 8498917.336 | 13227552.25 | 7870372.637 | 10498148.18 | 20264234.05 |
| Com_7502_po: 13,14-dihyd  | C16 H26 O5   | 320.15846 | 1.419 | 321.16589 | Invalid mass | No results    | No results  | 15508791.35 | 9245372.773 | 16946383.43 | 22109571.49 | 13479602.44 | 22344353.43 | 11801993.39 |
| Com_7573_po: 3-N-Methyl   | C17 H13 N3 O | 187.0963  | 1.242 | 226.05956 | No results   | No results    | Full match  | 526849.4803 | 15004239.08 | 983162.044  | 1057251.628 | 18968346.14 | 24312632.62 | 2740609.623 |
| Com_7651_po: 5,7-dihydro  | C15 H10 O4   | 254.0576  | 6.657 | 255.06482 | Full match   | Partial match | No results  | 1671965.768 | 1356878.232 | 1447157.389 | 1542593.06  | 1417719.37  | 1701138.65  | 2622299.203 |
| Com_7839_po: 5,6-dimethyl | C8 H8 O4     | 168.04224 | 5.266 | 169.04956 | Full match   | No results    | Full match  | 9811953.264 | 11458055.17 | 9638864.537 | 27812728.37 | 16772449.87 | 12381703.12 | 16473501.93 |
| Com_7853_po: 15(R)-15-Me  | C21 H32 O4   | 330.21648 | 5.613 | 331.22519 | No results   | Invalid mass  | No results  | 14460580.48 | 7638812.372 | 10813771.45 | 14513602.02 | 10508228.89 | 11662969.12 | 11184327.02 |
| Com_7944_po: GPK          | C13 H24 N4 ( | 600.35882 | 5.179 | 601.36469 | Invalid mass | No results    | No results  | 1254480.757 | 2504408.076 | 1836842.289 | 1052365.066 | 1618261.581 | 1405187.014 | 1285064.774 |
| Com_7948_po: 17beta-Tren  | C18 H22 O2   | 270.16193 | 5.686 | 271.16934 | Full match   | Partial match | Full match  | 12843636.07 | 9930485.626 | 11104082.85 | 22320459.41 | 12411769.2  | 11627409.45 | 11998955.68 |
| Com_7995_po: TNK          | C14 H27 N5 ( | 686.35968 | 4.932 | 687.36664 | Invalid mass | No results    | No results  | 1099080.562 | 21939907.18 | 2337512.951 | 958370.6614 | 1412406.219 | 1554929.924 | 824402.3364 |
| Com_7997_po: N,1,5-triphe | C21 H16 N4 ( | 340.13956 | 5.838 | 341.1474  | Invalid mass | No results    | No results  | 10374394.72 | 9986609.394 | 8189021.974 | 16619368.26 | 16191247.26 | 9185985.003 | 10622537.76 |
| Com_8031_po: Cyclohexyl t | C26 H29 [2]H | 395.30339 | 6.762 | 396.31049 | Invalid mass | Invalid mass  | No results  | 8278213.659 | 5948599.685 | 15694926.36 | 13661782.88 | 7204781.698 | 7143319.549 | 13345681.59 |
| Com_8069_po: All-Trans-1  | C20 H32 O    | 288.24489 | 6.47  | 289.25217 | No results   | No results    | Full match  | 13657985.63 | 11884823.58 | 12588346.96 | 26833732.89 | 14443604.74 | 16089672.42 | 13915100.34 |
| Com_8076_po: ethyl 4-([C  | C17 H25 N3 ( | 373.14813 | 1.346 | 374.15561 | Invalid mass | No results    | No results  | 12668356.31 | 5532812.603 | 6570466.443 | 9070416.123 | 9023124.476 | 10896529.17 | 17228472.13 |
| Com_8102_po: Vitamin A    | C20 H30 O    | 286.22948 | 8.688 | 287.23633 | No results   | No results    | Full match  | 12232856.74 | 17970745.57 | 8294627.832 | 26901761.51 | 13875711.05 | 11915958.45 | 10027229.99 |
| Com_8139_po: alpha-Farne  | C15 H24      | 204.18746 | 9.906 | 205.19478 | No results   | No results    | Full match  | 4526403.605 | 21389789.93 | 11384066.68 | 8109747.517 | 11166538.02 | 10218315.78 | 6106741.986 |
| Com_8178_po: 17alpha-Hyd  | C21 H30 O3   | 330.21945 | 6.387 | 331.22687 | Full match   | Not the top   | hFull match | 9418526.639 | 18942739.44 | 16096214.04 | 12295091.95 | 8979024.966 | 6891601.214 | 11999882.41 |
| Com_8239_po: DL-3,4-Dihy  | C8 H10 O4    | 170.05832 | 5.421 | 171.0656  | No results   | No results    | Full match  | 13525018.86 | 10280489.51 | 696450.5989 | 1714151.415 | 1704433.719 | 17359455.25 | 883412.1824 |
| Com_8245_po: YKK          | C21 H35 N5 ( | 419.25291 | 5.121 | 420.25955 | Invalid mass | No results    | No results  | 8458281.897 | 3887496.371 | 9258110.35  | 15718779.75 | 9517127.069 | 10769154.86 | 11679486.91 |
| Com_8263_po: PB-22 N-(4-  | C14 H17 N O  | 247.12049 | 5.086 | 248.12804 | No results   | Full match    | No results  | 5361507.716 | 7506028.787 | 6698961.337 | 12981175.9  | 7240824.284 | 7748245.389 | 17424647.63 |
| Com_8275_po: 4-oxo-4-(5,  | C14 H15 N O  | 227.09114 | 1.332 | 228.09842 | Invalid mass | No results    | No match    | 13424538.38 | 2025606.11  | 3553122.14  | 3541775.81  | 7239802.828 | 6905955.584 | 3481892.36  |
| Com_8277_po: N-[4-(dimet  | C14 H18 N4 ( | 548.28098 | 4.904 | 275.14777 | Invalid mass | No results    | No results  | 13417002.41 | 1092198.605 | 1681073.552 | 1064085.817 | 4927841.746 | 5749193.637 | 653453.4243 |
| Com_8279_po: 7-hydroxy-3  | C16 H12 O4   | 268.07339 | 6.259 | 269.08069 | Full match   | Partial match | No results  | 525185.5016 | 1279992.429 | 997943.9361 | 2475204.754 | 1682750.049 | 459910.7475 | 17361223.26 |
| Com_8442_po: 4-morpholin  | C11 H13 N O  | 229.07002 | 1.396 | 230.07732 | Invalid mass | No results    | No results  | 13045743.63 | 7897504.875 | 9731526.766 | 18781098.33 | 17634903.13 | 9704205.352 | 16179342.28 |
| Com_8471_po: 2-ethyl-2-(  | C15 H21 N O  | 247.15705 | 5.139 | 248.1649  | Full match   | No results    | No results  | 12979165.79 | 8891801.307 | 11111498.25 | 25621407.01 | 8627516.708 | 15048641.44 | 4082206.25  |
| Com_8511_po: 4-Hydroxyre  | C20 H28 O3   | 316.20254 | 5.611 | 317.21005 | No results   | No results    | Full match  | 10032731.99 | 4159181.427 | 6377446.832 | 12436659.94 | 3855269.726 | 9040456.49  | 5364139.996 |
| Com_8553_po: Homovanilli  | C9 H10 O4    | 182.05789 | 5.691 | 183.06506 | No results   | No results    | Full match  | 2064171.502 | 3646786.115 | 3696116.773 | 9144983.754 | 4379521.985 | 3183720.088 | 16557241.37 |

|                          |              |           |       |           |              |               |            |             |             |             |             |             |             |             |
|--------------------------|--------------|-----------|-------|-----------|--------------|---------------|------------|-------------|-------------|-------------|-------------|-------------|-------------|-------------|
| Com_8582_po:ethyl 2-amir | C14 H13 N O  | 259.06641 | 6.98  | 260.07306 | Full match   | No results    | No results | 3831397.506 | 2611399.072 | 6106293.002 | 16193649.6  | 595933.8442 | 5110625.833 | 5108161.285 |
| Com_8607_po:diethyl 2-(  | C26 H31 N O  | 443.20191 | 5.237 | 444.20908 | Invalid mass | No results    | No results | 4919336.534 | 8470813.725 | 7261608.616 | 14378252.38 | 10251000.07 | 12587532.19 | 10625333.16 |
| Com_8619_po:ACar 16:1    | C23 H44 N O  | 397.31923 | 7.051 | 398.32629 | No results   | Invalid mass  | No results | 2830961.425 | 10430170.44 | 8296271.773 | 4743116.803 | 3267037.635 | 2600703.743 | 9799205.39  |
| Com_8708_po:2-[1-(5-chl  | C11 H10 Cl N | 267.01961 | 5.612 | 268.02771 | Invalid mass | No results    | No results | 12409990.47 | 6436918.453 | 8169666.726 | 18221483.92 | 13986337.93 | 16133004.48 | 6460141.505 |
| Com_8792_po:(2R)-5-hydr  | C16 H14 O4   | 116.06612 | 5.82  | 117.07331 | Invalid mass | Invalid mass  | No results | 6091788.905 | 10823199.06 | 6925766.292 | 28667686.64 | 12654131.43 | 9443056.209 | 15284823.7  |
| Com_8915_po:1-(4-methoxy | C10 H14 O3   | 164.08373 | 9.599 | 165.091   | Invalid mass | No match      | No match   | 9877427.556 | 6391291.755 | 5568883.867 | 13020721.37 | 1466603.274 | 6379941.537 | 6262139.861 |
| Com_8926_po:NMK          | C15 H29 N5   | 373.18493 | 5.067 | 374.19211 | Invalid mass | No results    | No results | 3839195.897 | 4471858.128 | 4372052.368 | 6800232.216 | 5308987.048 | 5223580.228 | 3494716.474 |
| Com_8987_po:3,6-bis[(1H  | C22 H20 N4   | 372.15766 | 5.73  | 373.16522 | Full match   | No results    | No results | 5170072.066 | 4179536.519 | 15328793.97 | 5400410.318 | 10289246.92 | 4678549.582 | 10992217.7  |
| Com_9004_po:KKK          | C18 H38 N6   | 384.28529 | 6.102 | 385.29199 | Invalid mass | No results    | No results | 11850410.09 | 15316997.73 | 8550211.208 | 7047151.929 | 16802947.64 | 17497847.42 | 2971811.571 |
| Com_9019_po:N-[4-(tert-C | H28 N2       | 310.19579 | 6.51  | 311.20282 | Invalid mass | No results    | No results | 11815320.4  | 4650544.761 | 6194082.88  | 1643493.816 | 1156516.717 | 909096.2548 | 815366.7932 |
| Com_9021_po:3,3-dimethyl | C14 H19 N O  | 498.2729  | 5.03  | 250.14374 | Invalid mass | No results    | No results | 2148424.172 | 1852476.891 | 2209437.627 | 4618903.798 | 2178153.388 | 2877503.072 | 8439504.451 |
| Com_9022_po:5-phenyl-2,  | C15 H12 N2   | 258.075   | 5.366 | 259.08255 | Invalid mass | No results    | No results | 3837757.682 | 6027867.683 | 5649248.91  | 19634196.79 | 5543211.915 | 5584641.964 | 8251838.743 |
| Com_9024_po:Dutasteride  | C27 H30 F6 N | 506.23865 | 5.154 | 507.24445 | Invalid mass | No results    | No results | 5773887.618 | 6692076.044 | 5508699.105 | 4535042.21  | 6158706.76  | 6002128.093 | 9277596.11  |
| Com_9026_po:3-[4-hydrox  | C14 H16 N2   | 260.11815 | 5.334 | 261.12552 | Invalid mass | No results    | No results | 11279985.01 | 1240109.308 | 3152212.358 | 5794156.979 | 4079528.932 | 18568823.97 | 4830781.636 |
| Com_9121_po:3,5-di(2-fu  | C15 H12 O4   | 256.07311 | 5.519 | 257.08075 | Full match   | Partial match | No results | 11618534.26 | 6791146.04  | 12018420.99 | 11505998.34 | 11504133.3  | 16478194.84 | 837384.2738 |
| Com_9408_po:NKK          | C16 H32 N6   | 388.24337 | 4.874 | 389.25079 | Full match   | No results    | No results | 3205336.521 | 17248448.76 | 12541151.14 | 1266443.504 | 5151183.936 | 2235611.761 | 2104216.586 |
| Com_9427_po:3-hydroxy-2- | C15 H19 N3   | 311.12645 | 5.871 | 312.13385 | Invalid mass | No results    | No results | 9724386.313 | 8848397.479 | 10496913.86 | 20591835.51 | 7580148.605 | 10530435.33 | 14288523.73 |
| Com_9442_po:1H-indene-3- | C10 H9 N O   | 181.04883 | 1.422 | 182.05611 | Invalid mass | No results    | No results | 11002802.58 | 4841935.16  | 11714228.61 | 18730428.58 | 10555928.04 | 11108861.64 | 2564024     |
| Com_9469_po:GQH          | C13 H20 N6   | 340.14962 | 4.951 | 341.15701 | Full match   | No results    | No results | 1157764.205 | 3544547.416 | 3512501.687 | 4106759.928 | 5703690.824 | 2320065.761 | 12687422.65 |
| Com_9471_po:8-Aminoocat  | C8 H17 N O2  | 159.12574 | 5.314 | 160.13306 | No results   | No results    | Full match | 2641688.743 | 2261847.614 | 11155806.09 | 3470986.695 | 5468002.723 | 6000178.69  | 1442674.741 |
| Com_9495_po:Cortisol     | C21 H30 O5   | 362.20921 | 6.292 | 363.21622 | No results   | Full match    | Full match | 10923867.8  | 2555218.716 | 3682269.734 | 4832041.778 | 4777543.061 | 7614121.603 | 2256149.978 |
| Com_9521_po:Lagochilin   | C20 H36 O5   | 356.26213 | 9.216 | 357.26941 | No results   | Invalid mass  | No results | 227743.5074 | 4028325.711 | 14040224.41 | 5174666.701 | 6042749.89  | 551292.1626 | 1504425.95  |
| Com_9527_po:Lysopc 18:3  | C26 H48 N O  | 517.31846 | 7.224 | 518.32593 | No results   | No results    | Full match | 3629941.612 | 2196133.162 | 2750553.349 | 1785802.391 | 644832.3215 | 2983475.955 | 5419412.47  |
| Com_9546_po:4-(2,3-dihy  | C14 H12 F3 N | 279.09712 | 5.044 | 280.1044  | Full match   | No results    | No results | 1620754.844 | 1576583.886 | 2338149.81  | 3708216.356 | 2050394.959 | 1914672.242 | 2427327.351 |
| Com_9577_po:2-(3,4-dihy  | C15 H12 O5   | 272.06773 | 5.588 | 273.0751  | Full match   | Partial match | No results | 6231465.528 | 6288055.967 | 13901557.7  | 18276241.61 | 6862538.171 | 10396800.35 | 8138836.077 |
| Com_9582_po:Asaraldehyd  | C10 H12 O4   | 196.07345 | 8.159 | 197.08052 | No results   | No results    | Full match | 1264517.458 | 2362817.982 | 1959494.898 | 6064255.248 | 2785391.648 | 2432976.98  | 4856058.432 |
| Com_9621_po:APH          | C14 H21 N5   | 323.15871 | 1.423 | 324.16592 | Full match   | No results    | No results | 10700827.78 | 3777082.727 | 5912049.53  | 10111317.53 | 5004440.805 | 10542349.51 | 3219970.888 |
| Com_9687_po:Kojic acid   | C6 H6 O4     | 142.02429 | 1.197 | 143.03098 | No results   | Invalid mass  | No results | 3312139.536 | 16494982.57 | 11770053.34 | 21879118.99 | 10651455.66 | 9988430.557 | 4894217.438 |
| Com_9813_po:WLK          | C23 H35 N5   | 445.26853 | 5.112 | 446.27615 | Full match   | No results    | No results | 1074571.152 | 8604603.947 | 1872043.02  | 2034576.092 | 1170629.563 | 1228944.456 | 810824.5962 |
| Com_9994_po:(2E)-6-hydr  | C15 H20 O3   | 270.12135 | 1.503 | 271.12863 | Invalid mass | No results    | No results | 10143075.24 | 5161445.875 | 7431569.997 | 11387821.46 | 9622964.034 | 11884644.93 | 8867458.175 |
| Com_10115_p:FNK          | C19 H29 N5   | 203.60817 | 4.818 | 204.61542 | Invalid mass | No results    | No results | 2525928.569 | 2350450.686 | 3009981.628 | 3002552.405 | 1625739.027 | 2941925.987 | 2248683.843 |
| Com_10116_p:Nor-9-carbo  | C21 H28 O4   | 344.19821 | 5.855 | 345.20529 | No results   | Full match    | No results | 5793853.971 | 12765412.65 | 8394630.851 | 9649234.189 | 6357493.492 | 5350107.783 | 8483116.739 |
| Com_10175_p:PC (3:0/13   | C24 H46 N O  | 507.30593 | 5.165 | 508.3132  | No results   | Invalid mass  | No results | 871237.0086 | 1328251.684 | 3973643.467 | 1224474.147 | 1699901.189 | 1006825.05  | 476228.1995 |
| Com_10233_p:Oxolamine    | C14 H19 N3   | 245.14902 | 4.731 | 246.1563  | Invalid mass | No results    | No results | 937052.486  | 993936.7216 | 892095.8007 | 410897.9496 | 552727.1191 | 869804.3916 | 257523.9008 |
| Com_10294_p:VQH          | C16 H26 N6   | 382.19647 | 4.779 | 383.20352 | Full match   | No results    | No results | 5297837.244 | 8787454.444 | 4357201.016 | 3421529.174 | 6518325.506 | 4444020.479 | 3599541.787 |

|                                           |           |       |           |              |              |            |             |             |             |             |             |             |             |
|-------------------------------------------|-----------|-------|-----------|--------------|--------------|------------|-------------|-------------|-------------|-------------|-------------|-------------|-------------|
| Com_10320_p(1-hydroxy-1-C18 H20 O5        | 338.11486 | 6.358 | 339.12173 | Invalid mass | No results   | No results | 6546815.249 | 10629379.29 | 2998673.664 | 7699914.36  | 5189807.977 | 3778304.439 | 10566573.59 |
| Com_10333_p(ethyl 4-methyl C11 H12 N2 O   | 236.06242 | 1.179 | 237.06996 | Full match   | No results   | No results | 3337372.435 | 5956396.484 | 2896338.549 | 2617648.107 | 4017161.362 | 4206320.93  | 2054939.414 |
| Com_10384_p(PC (18:4e/2:C28 H50 N O)      | 543.33283 | 9.017 | 544.34021 | No results   | Full match   | Full match | 2925469.623 | 14774472.33 | 5025821.529 | 6938504.99  | 2726183.47  | 7777551.813 | 6592287.783 |
| Com_10388_p(1-(1-benzyl)C21 H27 F N2      | 374.18345 | 5.454 | 375.19116 | Full match   | No results   | No results | 8733735.594 | 7476090.601 | 9441937.581 | 15505591.72 | 11196560.95 | 11088103.62 | 12005782.86 |
| Com_11040_p(4-(beta-D-Glc)C11 H18 O8      | 300.08173 | 5.354 | 301.08942 | Invalid mass | No results   | No results | 2788993.645 | 2842618.232 | 2040127.192 | 13593054.3  | 7169988.282 | 5448531.005 | 11055421.69 |
| Com_11069_p(N-Acetyl-DL-C13 H14 N2 O      | 246.09967 | 5.577 | 247.10669 | No results   | Full match   | Full match | 1521201.092 | 1811477.106 | 4443326.089 | 6946457.475 | 5639458.707 | 6127639.388 | 3100837.095 |
| Com_11163_p(Ethyl oleate)C20 H38 O2       | 310.28628 | 6.584 | 311.29315 | No results   | Full match   | Full match | 8405054.251 | 6114138.785 | 1846331.582 | 1743180.423 | 7512265.845 | 8672115.134 | 484481.6185 |
| Com_11408_p(1-(7-methoxy)C17 H18 O6       | 340.09218 | 5.219 | 341.09961 | Invalid mass | Unused       | No results | 8131776.312 | 3748794.15  | 3910920.924 | 3119637.124 | 11977797.46 | 7282993.224 | 994516.2026 |
| Com_11425_p(Fluprosteno)C26 H36 F3 N      | 553.21686 | 8.332 | 554.22418 | No results   | Invalid mass | No results | 300452.1353 | 385799.8419 | 245838.5268 | 414529.1059 | 329559.8626 | 332358.0322 | 434786.9863 |
| Com_11445_p(Ergosterol C28 H44 O          | 396.33987 | 7.58  | 397.34616 | No results   | No results   | Full match | 8075970.568 | 6695862.107 | 5030055.322 | 5579003.009 | 4591047.865 | 5826822.58  | 3504570.178 |
| Com_11496_p(IQH C17 H28 N6 O              | 396.21284 | 4.817 | 397.22025 | Full match   | No results   | No results | 990046.5295 | 1692525.655 | 1346795.232 | 1141113.682 | 919168.2542 | 1004952.762 | 531750.8216 |
| Com_11545_p(Carnosine C9 H14 N4 O2        | 226.10673 | 1.249 | 227.11389 | No results   | No results   | Full match | 4835508.035 | 5994554.878 | 4108131.323 | 3511237.61  | 4520549.72  | 4530651.884 | 6611162.07  |
| Com_11576_p(N,N'-Di-2-nitro)C26 H20 N2    | 360.16525 | 5.798 | 361.17267 | Invalid mass | No results   | No results | 5299804.398 | 1112838.965 | 2057039.75  | 7533293.631 | 3297626.387 | 3511313.505 | 1762389.527 |
| Com_11594_p(Adipamide C6 H12 N2 O2        | 144.08987 | 1.261 | 145.09692 | No results   | No results   | Full match | 7910316.163 | 5472330.469 | 3419512.789 | 2129294.962 | 4956997.739 | 3049257.949 | 4401978.349 |
| Com_11684_p(2-hydroxy-6-C22 H30 O3        | 342.21973 | 7.305 | 343.22723 | Full match   | Invalid mass | No results | 6142769.824 | 5533920.44  | 5897101.771 | 7334094.63  | 4659263.427 | 6383746.32  | 7555739.892 |
| Com_12025_p(2-benzyl-6-C14 H17 N O2       | 231.12587 | 6.496 | 232.13313 | Full match   | No results   | No results | 3192470.764 | 11611814.2  | 1861370.274 | 6224233.011 | 3358466.55  | 1803289.814 | 7744249.384 |
| Com_12036_p(Methysticin C15 H14 O5        | 274.08406 | 5.632 | 275.09146 | No results   | Full match   | No results | 4080518.335 | 6217642.713 | 7209177.968 | 4609544.516 | 4311133.07  | 8536717.843 | 9632106.039 |
| Com_12057_p((6R,S)-5,1(C20 H21 N7 O       | 455.15434 | 4.855 | 456.16162 | No results   | Full match   | No results | 7412269.565 | 496861.2136 | 374738.6975 | 401864.9069 | 429331.9869 | 2903723.83  | 301834.6763 |
| Com_12104_p(1-(2-pyridin)C15 H11 N3 O     | 249.08612 | 3.88  | 250.09343 | Invalid mass | No results   | No results | 2287614.031 | 2050471.537 | 2378203.049 | 11515315.47 | 3204822.571 | 3756338.895 | 6178310.239 |
| Com_12155_p(2-methyl-6-C19 H15 N O2       | 359.0625  | 1.355 | 360.06958 | Invalid mass | No results   | No results | 2249327.268 | 1188013.353 | 2441046.686 | 3552051.217 | 3027051.881 | 2110279.575 | 9480207.845 |
| Com_12327_p(7-Ketochole)C27 H44 O2        | 400.33387 | 8.175 | 401.34088 | No results   | No results   | Full match | 6618574.24  | 8116014.329 | 5885132.078 | 7856255.703 | 4614022.995 | 5723104.452 | 5886401.997 |
| Com_12484_p(4-bromo-1-(C13 H14 Br O       | 375.9697  | 1.272 | 376.97757 | Invalid mass | No results   | No results | 891255.1124 | 6894467.067 | 4569552.049 | 1504793.972 | 2937203.429 | 3634623.215 | 317763.1309 |
| Com_12503_p(Lysog 18:1 C24 H47 O9 F       | 510.29578 | 7.773 | 511.3031  | No results   | No results   | Full match | 6985115.253 | 2380106.013 | 4984238.812 | 6711594.924 | 3627733.755 | 4051483.001 | 2295387.419 |
| Com_12643_p(Andrographol)C20 H30 O5       | 372.19151 | 6.527 | 373.19894 | No results   | Invalid mass | No results | 2131313.316 | 4340648.071 | 8850181.808 | 5741801.988 | 1887263.599 | 2218293.859 | 2603365.629 |
| Com_12700_p(ACar 18:0 C25 H50 N O2        | 427.36633 | 7.987 | 428.37399 | No results   | Invalid mass | No results | 3037437.738 | 10610966.29 | 4216841.553 | 2924983.914 | 1916512.545 | 1522712.336 | 2684352.089 |
| Com_12753_p(T-2 Triol C20 H30 O7          | 382.19771 | 6.656 | 383.20422 | No results   | Full match   | No results | 474732.234  | 2716492.275 | 599717.6883 | 10762019.43 | 1494423.659 | 492796.0412 | 8749828.904 |
| Com_12803_p(LPH C17 H27 N5 O              | 730.42046 | 5.395 | 731.42712 | Invalid mass | No results   | No results | 1766975.375 | 2935900.028 | 2355253.719 | 2706837.035 | 3259952.431 | 2522381.41  | 1599944.839 |
| Com_12806_p(N-[5-(tert-butyl)C15 H16 F3 N | 343.1204  | 5.174 | 344.12784 | Invalid mass | No results   | No results | 1838392.973 | 3650322.177 | 1808079.677 | 2347167.235 | 1659017.586 | 1858547.037 | 2581668.627 |
| Com_12917_p(SKK C15 H31 N5 O              | 343.21635 | 5.107 | 344.22375 | Invalid mass | No results   | No results | 863376.2165 | 1098908.096 | 779452.6571 | 728585.7043 | 753324.437  | 714107.5184 | 493625.9083 |
| Com_12956_p(4-hydroxy-3-C12 H14 O3        | 206.09391 | 6.523 | 207.10135 | Full match   | Invalid mass | No results | 1031365.46  | 1068506.06  | 1323400.591 | 1777904.76  | 908227.5974 | 1107298.486 | 4017031.923 |
| Com_13060_p(Hypotaourine C2 H7 N O2 S     | 109.01981 | 1.262 | 110.02708 | No results   | No results   | Full match | 521013.9065 | 1724645.868 | 311688.8443 | 311668.0472 | 414209.8668 | 407175.4738 | 8419341.802 |
| Com_13275_p(Boldione C19 H24 O2           | 284.17778 | 5.822 | 285.18527 | No results   | No results   | Full match | 6320316.352 | 4930178.526 | 4413630.645 | 4892872.134 | 6368711.312 | 6509346.851 | 3369961.671 |
| Com_13344_p(P-Hydroxyber)C7 H6 O2         | 122.03438 | 1.185 | 123.04165 | No results   | Invalid mass | No results | 3042437.301 | 9629802.354 | 6399588.105 | 14637554.33 | 7072651.528 | 7761993.523 | 4235914.402 |
| Com_13375_p(2-Naphthol C10 H8 O           | 144.05694 | 6.672 | 145.06421 | No results   | No results   | Full match | 4310953.457 | 2401203.051 | 2551506.441 | 4305718.576 | 2449559.637 | 2930302.922 | 2872665.642 |
| Com_13380_p(1,2-dihydro)C19 H34 O4        | 348.22835 | 7.294 | 349.23563 | Invalid mass | No match     | No results | 3718350.493 | 9691710.804 | 6891033.914 | 8174611.958 | 9988275.542 | 6543524.359 | 5780308.185 |

|                                       |           |        |           |              |              |            |             |             |             |             |             |             |             |
|---------------------------------------|-----------|--------|-----------|--------------|--------------|------------|-------------|-------------|-------------|-------------|-------------|-------------|-------------|
| Com_13520_p(TrimethyllycC9 H21 N2 O)  | 189.1599  | 9.789  | 190.16718 | No results   | No results   | Full match | 6101874.954 | 6479939.96  | 2288049.985 | 3499245.049 | 7808940.633 | 6140122.973 | 2800108.634 |
| Com_13593_p(Fumonisin B1C34 H59 N O)  | 721.38824 | 5.732  | 722.39484 | No results   | Full match   | No results | 5804813.324 | 4013049.799 | 2868915.236 | 1481101.894 | 10112238.97 | 5244867.511 | 471671.3005 |
| Com_13792_p(PC (14:1e/2:C24 H48 N O)  | 493.3171  | 8.57   | 494.32401 | No results   | Full match   | Full match | 1953399.713 | 9162278.998 | 1530451.276 | 813758.9206 | 2845377.596 | 4540526.797 | 5254304.213 |
| Com_13817_p(PC (2:0/13:1C23 H44 N O)  | 493.27196 | 5.852  | 494.27924 | No results   | Invalid mass | No results | 735544.3437 | 1136042.356 | 743370.1723 | 1579375.152 | 829163.535  | 822618.6876 | 809622.8685 |
| Com_13834_p(Diosgenin C27 H42 O3      | 396.30167 | 8.075  | 397.30826 | No results   | Invalid mass | No results | 5852907.016 | 3238911.064 | 3351249.448 | 2879686.804 | 3339003.513 | 3751845.992 | 3037781.403 |
| Com_13844_p(Dulcitol C6 H14 O6        | 182.07915 | 1.411  | 183.08635 | No results   | No results   | Full match | 4592073.958 | 1863624.204 | 2686749.977 | 3582992.095 | 3027826.897 | 3914837.528 | 1764358.24  |
| Com_13891_p(Ergosterol C28 H44 O3     | 428.32845 | 6.863  | 429.33572 | No results   | Full match   | No results | 5794518.538 | 2387338.851 | 3163477.828 | 2694271.799 | 1929106.317 | 2118077.077 | 1535111.015 |
| Com_14115_p(Ip7G C16 H23 N5 O         | 365.16903 | 1.413  | 366.17615 | No results   | No results   | Full match | 3531700.973 | 3164835.776 | 2970552.786 | 4396649.976 | 3330835.59  | 2968200.616 | 2829442.839 |
| Com_14125_p(N-cyclohexylC25 H28 N2 O  | 388.21383 | 8.17   | 389.22156 | Full match   | No results   | No results | 4716421.734 | 2988604.301 | 2825473.676 | 6618292.105 | 3543106.422 | 2178220.014 | 6563061.476 |
| Com_14216_p(3-hydroxy-3, C20 H22 O7   | 374.13557 | 5.823  | 375.14233 | Full match   | No results   | No results | 1145289.337 | 1231169.419 | 905042.9744 | 2419608.911 | 2244304.05  | 1260751.661 | 2898956.107 |
| Com_14408_p(MPK C16 H30 N4 O          | 356.18813 | 5.009  | 357.1954  | Invalid mass | No results   | No results | 1886003.982 | 3469866.434 | 2222705.967 | 1516956.345 | 1568498.285 | 1600968.924 | 499164.5764 |
| Com_14466_p(TryptophanolC11 H14 N2 O  | 190.11075 | 5.192  | 191.11803 | No results   | No results   | Full match | 4631754.171 | 3502603.851 | 3098700.866 | 4539433.43  | 4756904.182 | 4297179.424 | 3342941.873 |
| Com_14573_p(3-(dimethylC15 H16 N2 O   | 256.12064 | 5.809  | 257.12787 | Full match   | No results   | No results | 5316227.348 | 2659555.694 | 3200154.119 | 5519825.437 | 3639269.765 | 4801443.678 | 2385678.528 |
| Com_14599_p(Alternariol C14 H10 O5    | 258.05716 | 1.198  | 259.06436 | No results   | Invalid mass | No results | 249608.063  | 2740911.068 | 1259716.226 | 1190006.669 | 1453088.626 | 890549.5304 | 350894.9672 |
| Com_14623_p((5E)-7-methylC15 H24 O3   | 274.15703 | 6.046  | 275.16431 | Invalid mass | Invalid mass | No results | 3218262.083 | 3432531.864 | 3803294.416 | 5099056.066 | 3266831.905 | 3321095.389 | 6845547.476 |
| Com_14726_p(N'-[6-(tert-C18 H20 N4 O  | 322.11965 | 6.803  | 323.12708 | Invalid mass | No match     | No results | 2396654.368 | 8123485.99  | 1318889.025 | 2481138.681 | 2214981.112 | 996908.8002 | 6641847.994 |
| Com_14750_p(2,6-di[2-ch]C24 H26 Cl2   | 428.14358 | 5.793  | 429.15091 | Full match   | No results   | No results | 284228.9766 | 304174.8582 | 330065.4278 | 482933.8582 | 571391.8696 | 305343.3054 | 748553.3063 |
| Com_14825_p(PC (14:1e/3:C25 H50 N O)  | 507.33262 | 9.24   | 508.33997 | No results   | Full match   | No results | 234739.9175 | 4735241.247 | 642153.4369 | 642562.3724 | 684323.6963 | 1146591.842 | 6659473.426 |
| Com_15054_p(KMH C17 H30 N6 O          | 396.20018 | 4.857  | 397.20779 | Invalid mass | No results   | No results | 4497654.818 | 3576635.234 | 2886760.47  | 8498223.199 | 7160670.204 | 6824502.2   | 4287950.785 |
| Com_15073_p(Fisetin C15 H10 O6        | 286.05068 | 1.13   | 287.05795 | No results   | Invalid mass | No results | 4156733.093 | 2141975.998 | 2282646.657 | 2323814.601 | 4912473.095 | 2591506.568 | 1615004.086 |
| Com_15205_p((2E,4E)-N-(C16 H29 N O    | 251.22463 | 9.935  | 252.2319  | Full match   | No results   | No results | 4897265.385 | 1612901.235 | 1495996.822 | 1815325.9   | 4510618.644 | 5122937.07  | 617559.6298 |
| Com_15287_p(L-arginine C6 H14 N4 O2   | 174.11185 | 4.025  | 175.11913 | No results   | No results   | Full match | 711435.4306 | 1142397.534 | 1018593.379 | 687251.7628 | 877832.0804 | 779970.8822 | 609302.3675 |
| Com_15498_p(6-Methoxy-2-C12 H10 O3    | 202.06359 | 1.107  | 203.0708  | No results   | No results   | Full match | 4590275.841 | 4291563.793 | 3180659.766 | 8001396.137 | 3943452.175 | 5267940.413 | 5807966.607 |
| Com_15564_p(2-AminobenzC6 H7 N O3 S   | 173.01456 | 5.178  | 174.02184 | No results   | No results   | Full match | 944619.2851 | 2365451.821 | 1720582.429 | 2354066.491 | 2110210.863 | 2644053.926 | 1725781.172 |
| Com_15740_p(PC (18:1/18:C44 H84 N O)  | 785.59203 | 10.039 | 786.5993  | No results   | Full match   | No results | 224510.9738 | 1489249.88  | 999183.101  | 946401.1104 | 616073.4642 | 470434.2325 | 5909046.197 |
| Com_15781_p(PC (7:0/7:0)C22 H44 N O)  | 481.28665 | 8.816  | 482.29382 | No results   | Invalid mass | No results | 1190905.855 | 1188885.624 | 950118.3215 | 1405846.918 | 563405.0694 | 843396.8952 | 1271336.214 |
| Com_15865_p(FRH C21 H30 N8 O          | 458.24095 | 9.464  | 459.24899 | Full match   | No results   | No match   | 333145.3596 | 7014461.42  | 1380793.628 | 271902.1422 | 939372.953  | 1018146.202 | 5058388.818 |
| Com_15994_p(NorverapamilC26 H36 N2 O  | 440.27529 | 6.537  | 441.28247 | No results   | Invalid mass | No results | 2008197.236 | 1582192.494 | 5711707.153 | 3351245.43  | 7195094.134 | 2842351.858 | 2934013.922 |
| Com_16087_p(KNK C16 H32 N6 O          | 388.24352 | 4.72   | 389.25079 | Full match   | No results   | No results | 1518278.072 | 6142466.996 | 2673486.602 | 823126.0351 | 1558500.369 | 1314927.097 | 977359.791  |
| Com_16154_p(Citrinin C13 H14 O5       | 250.08837 | 1.413  | 251.09564 | No results   | Invalid mass | No results | 3205348.258 | 3389917.688 | 3001975.928 | 6192651.992 | 3041724.066 | 3821005.982 | 5626497.3   |
| Com_16257_p(DPK C15 H26 N4 O          | 336.20368 | 5.005  | 359.1929  | Invalid mass | No results   | No results | 3397920.752 | 1289853.504 | 1770993.87  | 1256146.49  | 1240873.395 | 1266561.63  | 600107.9716 |
| Com_16321_p(17alpha-EthiC20 H24 O2    | 296.17869 | 5.167  | 297.18594 | No results   | No results   | Full match | 833575.4253 | 1114779.749 | 1234165.996 | 1038381.34  | 1086729.406 | 1064683.251 | 810193.9356 |
| Com_16502_p(N-[3-(1H-imidC13 H12 F3 N | 359.08201 | 5.932  | 360.08902 | Invalid mass | No results   | No results | 2366109.189 | 2405340.597 | 1880155.344 | 3184339.546 | 7005055.031 | 2380131.145 | 631564.1053 |
| Com_17028_p(cyclohexylC21 H26 N4 O    | 382.20167 | 9.391  | 383.20847 | Full match   | No results   | No results | 243485.4291 | 6095543.009 | 4056095.105 | 862602.9641 | 3244499.85  | 396658.9453 | 3355994.951 |
| Com_17086_p(Celastrol C29 H38 O4      | 450.27773 | 7.341  | 451.285   | No results   | Full match   | No results | 844841.779  | 1393355.252 | 1641538.295 | 1401778.303 | 1025535.669 | 1219813.931 | 1194572.587 |



|                                                                   |           |       |           |              |              |            |             |             |             |             |             |             |             |
|-------------------------------------------------------------------|-----------|-------|-----------|--------------|--------------|------------|-------------|-------------|-------------|-------------|-------------|-------------|-------------|
| Com_17224_p( D-α-Tocopherol C29 H50 O2                            | 430.38107 | 9.944 | 413.37708 | No results   | Full match   | No results | 3821698.464 | 3989201.942 | 1966621.843 | 4196605.836 | 4852965.903 | 2172000.696 | 1551757.822 |
| Com_17546_p( 2-(14,15-Epoxycyclohex-2-en-1-yl)ethanol C23 H38 O5  | 394.27278 | 7.58  | 395.27936 | No results   | Full match   | Full match | 3676032.232 | 3310412.888 | 2444063.084 | 2272769.805 | 3009754.375 | 5259560.216 | 2346264.285 |
| Com_17901_p( Lactobionic acid C12 H22 O12                         | 358.11152 | 1.44  | 359.11874 | No results   | No results   | Full match | 3517067.084 | 1515705.746 | 2802697.387 | 3425733.069 | 4302242.519 | 5094278.622 | 2710196.685 |
| Com_18016_p( 2'-Deoxyadenosine C10 H14 N5 O4                      | 331.06801 | 4.749 | 332.07529 | No results   | Full match   | Full match | 284859.1446 | 235784.7861 | 361915.7062 | 273617.106  | 239107.156  | 221795.0287 | 1263624.953 |
| Com_18227_p( Flunitrazepam C16 H9 [2]HCl                          | 316.10555 | 4.841 | 317.11191 | Full match   | No results   | No results | 888404.9277 | 810940.5396 | 914746.0425 | 3908929.406 | 5678954.266 | 1854781.383 | 1591990.551 |
| Com_18372_p( 4-ethoxy-N-(1-cyclohexylethyl)benzamide C16 H17 N O2 | 255.12563 | 5.157 | 256.13309 | Full match   | No results   | No results | 3328254.347 | 1999093.451 | 2312929.353 | 5276777.971 | 1265934.867 | 3185133.746 | 328963.2591 |
| Com_18438_p( Thromboxane C20 H34 O6                               | 408.19058 | 7.613 | 409.19836 | Invalid mass | No results   | No results | 450316.9282 | 5146790.891 | 1816281.444 | 866887.6673 | 1253849.246 | 1182109.281 | 168680.7541 |
| Com_18519_p( Oxymatrine C15 H24 N2 O                              | 264.18331 | 5.293 | 265.19058 | No results   | Full match   | No results | 1655887.275 | 2931947.903 | 3143932.754 | 7565735.339 | 3999018.994 | 5070722.313 | 3241623.3   |
| Com_18633_p( 7-(3,4-dihydroxyphenyl)propanoic acid C19 H22 O5     | 352.1343  | 8.001 | 353.14142 | Invalid mass | No results   | No results | 568313.2616 | 5022073.038 | 2199851.333 | 1962220.082 | 2259802.439 | 1119248.872 | 3805546.753 |
| Com_18672_p( 1-(4-benzoyloxyphenyl)ethane C20 H20 O2              | 400.22376 | 5.83  | 401.23141 | Invalid mass | No results   | No results | 3209055.606 | 1935419.389 | 1863670.068 | 5586743.308 | 2890702.794 | 2866113.521 | 1684948.027 |
| Com_18818_p( 6-Ketoprostaglandin C20 H34 O6                       | 196.10801 | 6.865 | 393.22299 | No results   | Invalid mass | No results | 3152613.803 | 2530540.012 | 2304595.161 | 3161131.608 | 2213918.603 | 2959875.636 | 2678922.447 |
| Com_18990_p( D-Gluconic acid C6 H12 O7                            | 196.05864 | 1.101 | 197.06592 | No results   | No results   | Full match | 452093.4748 | 176143.264  | 782466.6686 | 1784849.638 | 952542.6476 | 3946752.865 | 2086893.828 |
| Com_18994_p( 5-hydroxy-6,11-dihydro-5H-benzofuran C17 H14 O5      | 280.07189 | 5.608 | 281.07874 | Invalid mass | No results   | No results | 3094523.384 | 2667743.248 | 3401495.005 | 6380358.068 | 3462551.832 | 3850522.287 | 1920439.927 |
| Com_19019_p( Stearoyl ethyl ether C20 H41 N O2                    | 327.313   | 7.367 | 328.32056 | Full match   | No results   | No results | 1486047.947 | 4807541.533 | 1706260.087 | 1397103.617 | 2519181.039 | 1610865.051 | 2092220.264 |
| Com_19113_p( (2E)-N-(4-aminophenyl)acetamide C16 H22 N2 O         | 328.14064 | 5.726 | 329.14792 | Invalid mass | No results   | No results | 2402339.816 | 2437632.257 | 3008337.003 | 4239141.308 | 2471248.083 | 2336808.625 | 2247329.658 |
| Com_19254_p( 1,7-bis(4-hydroxyphenyl)heptane C19 H22 O3           | 298.1556  | 5.69  | 299.16287 | Full match   | No results   | No results | 1506099.419 | 1199638.059 | 3870078.197 | 5198522.186 | 2084187.298 | 2706247.054 | 2716818.593 |
| Com_19373_p( 3,5-Diiodo-L-tyrosine C15 H13 I2 N O                 | 524.89122 | 1.221 | 525.8985  | No results   | No results   | Full match | 105994.4862 | 4602150.555 | 1541060.977 | 719470.1697 | 795682.6946 | 434377.4173 | 109318.6607 |
| Com_19487_p( Jervine C27 H39 N O2                                 | 443.30295 | 6.881 | 444.3093  | No results   | Invalid mass | No results | 359393.758  | 250848.1931 | 379149.714  | 285886.8752 | 269955.2327 | 261529.5334 | 300498.423  |
| Com_19603_p( 2,3-dihydroxybutane C17 H34 O4                       | 324.2274  | 8.706 | 325.23468 | Invalid mass | No results   | No results | 40986.10688 | 664631.4855 | 953378.6669 | 479260.4757 | 4812023.609 | 350761.2244 | 312566.4642 |
| Com_19679_p( VPH C16 H25 N5 O                                     | 702.37723 | 4.666 | 352.19589 | Invalid mass | No results   | No results | 892343.553  | 826026.1076 | 894914.5121 | 534248.1938 | 4768892.404 | 491668.4528 | 328431.2474 |
| Com_20121_p( 3-phenyl-5-hydroxy-1H-imidazole C10 H6 N4 O          | 252.00774 | 5.591 | 253.01527 | Invalid mass | No results   | No results | 1850892.203 | 3067788.101 | 2014575.505 | 3341627.505 | 1833677.114 | 1682448.009 | 3486570.801 |
| Com_20244_p( 2-(1H-benzimidazol-2-yl)ethane C17 H11 N3 O          | 267.09712 | 1.425 | 290.08633 | Invalid mass | No results   | No match   | 2655500.619 | 1672800.537 | 1616606.849 | 3259671.539 | 1579863.725 | 2457048.229 | 2061291.138 |
| Com_20282_p( Monolaurin C15 H30 O4                                | 296.19636 | 7.928 | 297.20346 | Invalid mass | No results   | No results | 359649.9652 | 3155495.909 | 3413516.348 | 1807933.389 | 4109335.161 | 3029767.941 | 500929.3918 |
| Com_20367_p( Sulfamethazopyridine C12 H14 N4 O                    | 278.07864 | 5.863 | 279.0863  | No results   | Invalid mass | No results | 1619678.482 | 2096132.438 | 1597252.102 | 3607780.847 | 2662484.745 | 2211066.42  | 2244053.102 |
| Com_20654_p( FMK C20 H32 N4 O                                     | 446.19609 | 7.3   | 447.20313 | Invalid mass | No results   | No results | 1871624.511 | 2702176.696 | 2584690.319 | 2022682.553 | 1711017.284 | 1378091.397 | 1370691.134 |
| Com_20851_p( Strophanthin C23 H32 O6                              | 404.21715 | 6.623 | 405.22443 | No results   | Invalid mass | No results | 2455804.984 | 1991075.561 | 2742343.969 | 2636748.443 | 2559150.471 | 3051006.11  | 1806760.097 |
| Com_21416_p( YLH C21 H29 N5 O                                     | 414.18984 | 5.179 | 415.19711 | Invalid mass | No results   | No results | 538280.3878 | 1623989.692 | 2320725.563 | 1964329.294 | 1198739.643 | 1144182.677 | 1086674.369 |
| Com_21540_p( Pleuromutilin C22 H34 O5                             | 416.18805 | 6.03  | 417.19559 | Invalid mass | No results   | No results | 202605.7775 | 156693.0005 | 165034.1464 | 256858.0165 | 189484.1163 | 187967.4974 | 262807.4755 |
| Com_21811_p( TKK C16 H33 N5 O                                     | 357.23391 | 5.166 | 358.24146 | Invalid mass | No results   | No results | 404723.474  | 541255.799  | 589116.0229 | 503968.6232 | 523095.7425 | 516932.5907 | 389808.2216 |
| Com_22036_p( Sodium Dehydrocholic acid C24 H33 Na O               | 424.22412 | 6.354 | 425.23129 | No results   | No results   | Full match | 2105189.964 | 1369978.277 | 1437708.674 | 2038645.101 | 1304398.463 | 1349319.069 | 1016076.378 |
| Com_22112_p( 5α-Tetrahydrocorticosterone C21 H34 O5               | 388.21504 | 7.335 | 389.22232 | No results   | Invalid mass | No results | 871422.966  | 1161140.916 | 848844.8445 | 1115673.932 | 687042.3114 | 450484.6833 | 1467928.689 |
| Com_22222_p( beta-Estradiol C20 H26 O3                            | 314.1884  | 6.215 | 315.19568 | No results   | No results   | Full match | 2054965.273 | 1653029.505 | 1579805.361 | 3513967.882 | 1874337.81  | 2284842.708 | 1784727.167 |
| Com_22589_p( DKK C16 H31 N5 O                                     | 389.22484 | 4.842 | 390.23212 | Invalid mass | No results   | No results | 1952145.727 | 65028.80844 | 57994.81283 | 75833.79681 | 71697.87762 | 195712.9873 | 42842.0286  |
| Com_23025_p( Phylloquinone C31 H46 O2                             | 450.34971 | 7.849 | 451.35632 | No results   | No results   | Full match | 1831137.89  | 1137084.685 | 1413594.07  | 3910156.358 | 1443252.32  | 1370646.409 | 1913340.226 |
| Com_23128_p( 4-methylphenol C14 H16 N2 O                          | 260.09468 | 5.794 | 261.10202 | Invalid mass | No results   | No results | 944699.0245 | 1883227.85  | 1766421.16  | 4214534.198 | 2172092.118 | 2218415.176 | 2079631.27  |

|             |              |              |           |       |           |            |               |             |             |             |             |             |             |             |             |
|-------------|--------------|--------------|-----------|-------|-----------|------------|---------------|-------------|-------------|-------------|-------------|-------------|-------------|-------------|-------------|
| Com_24133_p | 10-Nitrolinc | C18 H31 N O  | 360.25697 | 6.852 | 361.26422 | No results | Invalid mass  | No results  | 907777.4758 | 1148381.338 | 2005725.062 | 565681.3235 | 622124.8499 | 638207.4381 | 645418.2547 |
| Com_24271_p | Gluconolact  | C6 H10 O6    | 178.04792 | 1.318 | 179.05531 | No results | No results    | Full match  | 574454.8044 | 329466.1203 | 354087.867  | 381938.6008 | 439499.3249 | 409832.6068 | 374669.3398 |
| Com_24556_p | Kanosamine   | C6 H13 N O5  | 380.13619 | 5.663 | 381.14346 | No results | Invalid mass  | No results  | 1455484.621 | 799987.4431 | 1024112.029 | 2108582.635 | 1478001.767 | 1756157.42  | 687193.8071 |
| Com_25902_p | DY131        | C18 H21 N3 O | 311.16313 | 5.104 | 645.31549 | No results | No results    | Full match  | 143833.3282 | 262857.8326 | 381510.6204 | 164068.6542 | 169639.5164 | 154764.0232 | 109673.2461 |
| Com_26100_p | Folic acid   | C19 H19 N7 O | 441.13777 | 5.15  | 442.14505 | No results | No results    | Full match  | 1075386.422 | 374203.3308 | 396827.705  | 901189.7932 | 739806.2323 | 1310752.084 | 271749.4376 |
| Com_26137_p | 2-Methoxyest | C19 H26 O3   | 302.18803 | 6.125 | 303.19495 | No results | No results    | Full match  | 1066463.992 | 1185978.637 | 715521.5471 | 1317231.502 | 897996.7152 | 1063076.696 | 772786.8211 |
| Com_26554_p | N alpha-Acet | C8 H16 N4 O  | 216.12151 | 5.155 | 217.12878 | No results | No results    | Full match  | 964593.8627 | 385048.4289 | 389928.3049 | 354701.6137 | 418106.5509 | 703380.7882 | 279843.5317 |
| Com_26663_p | Berberine    | C20 H17 N O  | 335.11871 | 5.427 | 336.12589 | No results | Invalid mass  | No results  | 795985.23   | 609160.9241 | 822189.8985 | 1506386.074 | 925902.7451 | 963992.6215 | 1208485.574 |
| Com_27417_p | Spectinomyci | C14 H24 N2 O | 364.18556 | 6.842 | 365.19284 | No results | Invalid mass  | No results  | 249659.7443 | 128081.3459 | 222462.8544 | 213233.9904 | 1148413.014 | 377611.1495 | 180459.4761 |
| Com_27794_p | LysoPC 20:2  | C28 H54 N O  | 547.364   | 9.775 | 548.37128 | No results | No results    | Full match  | 526223.4757 | 175070.3914 | 36411.11596 | 28570.82646 | 66858.95826 | 280299.2228 | 47279.76186 |
| Com_27871_p | 5-[(8Z,11Z)- | C21 H32 O2   | 316.23882 | 7.556 | 317.24609 | Full match | Partial match | Full match  | 481557.5286 | 87158.32404 | 32043.42672 | 228991.3922 | 157371.7754 | 296191.1641 | 210104.3675 |
| Com_27885_p | Palmitoyletl | C18 H37 N O  | 299.28203 | 6.196 | 300.28931 | No results | No results    | Full match  | 172791.221  | 109518.9571 | 244131.3596 | 148257.1257 | 162925.9225 | 900208.6112 | 103548.5447 |
| Com_27994_p | Diflorasone  | C22 H28 F2 O | 410.19182 | 6.298 | 411.1991  | No results | No results    | Full match  | 400466.2003 | 42659.045   | 43697.67886 | 57551.81053 | 45565.83527 | 48847.10192 | 43432.5437  |
| Com_54_pos  | Isoleucine   | C6 H13 N O2  | 131.09455 | 2.759 | 132.10182 | Full match | Not the top   | hFull match | 1737418708  | 3949702656  | 2314989827  | 1488322504  | 2774593797  | 1959223034  | 2196087352  |
| Com_118_pos | Dl-3-Hydroxy | C5 H11 N O3  | 133.07388 | 1.306 | 134.08104 | No results | No results    | Full match  | 1340079693  | 1533532925  | 1325490789  | 1252332103  | 1571115022  | 1890677210  | 1894109238  |
| Com_372_pos | Ala-Ile      | C9 H18 N2 O  | 202.13168 | 5.063 | 203.13908 | No results | Full match    | Full match  | 203620401.6 | 220888439.1 | 191120056.2 | 68942308.26 | 233678345.6 | 185384170.8 | 42357735.47 |
| Com_400_pos | Oxaceprol    | C7 H11 N O4  | 173.06884 | 1.451 | 174.07617 | No results | No results    | Full match  | 156845880.2 | 241724885.5 | 127423928.3 | 265370921.2 | 305928856.3 | 177769916.8 | 534070318.7 |
| Com_431_pos | gamma-Glutan | C11 H20 N2 O | 260.13703 | 5.095 | 261.14401 | No results | Full match    | Full match  | 162339552.5 | 204452558.5 | 138496448.1 | 90364449.26 | 208480736.5 | 107822157.4 | 94274058.8  |
| Com_436_pos | (5-L-Glutam  | C8 H14 N2 O  | 218.09023 | 1.413 | 219.09752 | No results | No results    | Full match  | 445368914.3 | 148317680.7 | 240856205.4 | 172601661.4 | 320620811.5 | 325856272.2 | 87226134.02 |
| Com_528_pos | Thr-Leu      | C10 H20 N2 O | 232.14211 | 4.998 | 233.14955 | No results | No results    | Full match  | 124776043.9 | 308876571.8 | 229559725.9 | 47803402.77 | 122354891.4 | 57877899.44 | 58778940.34 |
| Com_530_pos | 4-Hydroxyis  | C6 H13 N O3  | 147.08935 | 1.422 | 148.09676 | No results | No results    | Full match  | 90410761.18 | 234688003.4 | 254218161.1 | 396142681.2 | 523914478.1 | 607443708.3 | 274888394.2 |
| Com_558_pos | Homogentisi  | C8 H8 O4     | 168.04235 | 1.378 | 169.04961 | No results | No results    | Full match  | 345015152.2 | 59692198.67 | 238297276.9 | 201092905.3 | 206502641.9 | 203288088.9 | 182328295.5 |
| Com_613_pos | N-Acetylhist | C8 H11 N3 O  | 197.08    | 1.415 | 198.08733 | No results | Full match    | Full match  | 304962203.6 | 43017643.37 | 40064271.06 | 52377652.29 | 53750494.76 | 416197862.6 | 44403520.23 |
| Com_659_pos | 5-Hydroxyinc | C8 H7 N O    | 133.05222 | 5.647 | 134.05949 | Full match | Not the top   | hFull match | 287518492.1 | 121315544.9 | 160424983.4 | 180906106.6 | 32737493.76 | 528599678.9 | 41844107.65 |
| Com_676_pos | Nicotinuric  | C8 H8 N2 O3  | 180.05372 | 1.363 | 181.06088 | No results | No results    | Full match  | 273780808.1 | 32210189.72 | 23304008.84 | 1990330.221 | 1679709.653 | 388082812.8 | 30009817.79 |
| Com_684_pos | Taurodeoxycl | C26 H45 N O  | 499.29659 | 6.069 | 500.30371 | Full match | No results    | Full match  | 42198806.45 | 24329641.68 | 13044479.82 | 19509505.79 | 25317045.11 | 24235221.98 | 34360027.81 |
| Com_690_pos | 3-Nitro-L-Ty | C9 H10 N2 O  | 226.05891 | 1.418 | 227.06609 | No results | No results    | Full match  | 171815943.3 | 186691448.1 | 184819391.6 | 190549231.1 | 249011946.5 | 200375389.7 | 344754502.9 |
| Com_761_pos | 3-[4-methyl- | C15 H24 O4   | 268.16699 | 5.631 | 269.17471 | Full match | No results    | No results  | 244496481.9 | 97513170.21 | 104732049.7 | 224716901.8 | 149241313.8 | 226950771.2 | 100252693.9 |
| Com_910_pos | N-acetyl-L-  | C7 H14 N2 O  | 174.10043 | 1.416 | 175.10779 | No results | No results    | Full match  | 196286785   | 42466651.84 | 54122499.16 | 53775941.55 | 98350170.73 | 105396063.7 | 38794991.64 |
| Com_913_pos | L-lysine     | C6 H14 N2 O  | 146.10537 | 1.408 | 147.11267 | No results | No results    | Full match  | 144365781.9 | 20637794.54 | 20942205.02 | 35534473.66 | 33214327.93 | 36261396.99 | 25796340.72 |
| Com_920_pos | Nicotinamid  | C6 H6 N2 O   | 122.04793 | 1.419 | 123.05533 | No results | No results    | Full match  | 104687075.6 | 84027780.77 | 42368636.5  | 89159448.61 | 82144301.73 | 91752257.65 | 200322633.3 |
| Com_1029_po | 13-HPODE     | C18 H32 O4   | 312.23005 | 7.154 | 335.21948 | No results | No results    | Full match  | 43049997.89 | 264810302.2 | 200055735.8 | 58198067.25 | 121616769.9 | 81196250.54 | 133703452.1 |
| Com_1054_po | 5-Methyluri  | C10 H14 N2 O | 258.08538 | 1.408 | 259.09268 | No results | No results    | Full match  | 164827570.1 | 124184339.7 | 139373321.8 | 144903773.5 | 153520561.6 | 121068984.8 | 116524355.3 |
| Com_1102_po | Asp-Phe metl | C14 H18 N2 O | 294.12134 | 5.187 | 295.12891 | No results | No results    | Full match  | 45926751.41 | 69738753.2  | 63137914.48 | 51348602.69 | 52448395.24 | 35786692.15 | 56736739.41 |
| Com_1108_po | MAG (18:3)   | C21 H36 O4   | 352.26116 | 7.816 | 353.26846 | No results | No results    | Full match  | 6515924.83  | 244611884.7 | 122047179   | 69366789.65 | 92393488.91 | 16196834.7  | 54924228.61 |

|                                         |           |       |           |              |              |            |             |             |             |             |             |             |             |
|-----------------------------------------|-----------|-------|-----------|--------------|--------------|------------|-------------|-------------|-------------|-------------|-------------|-------------|-------------|
| Com_1142_po: 2-Deoxyuridic C9 H12 N2 O6 | 228.07454 | 1.416 | 229.08188 | No results   | No results   | Full match | 151400499   | 85071821.71 | 70024802.87 | 195563802.3 | 142472398.4 | 175070619.9 | 152117909.7 |
| Com_1175_po: Androsterone C19 H30 O2    | 272.21389 | 6.775 | 255.21085 | Invalid mass | Invalid mass | No results | 109409633.6 | 98994436.21 | 161550023.9 | 119939604.2 | 103550807.5 | 150970015.3 | 78844253.88 |
| Com_1271_po: Tyramine C8 H11 N O        | 137.08394 | 2.534 | 138.09122 | No results   | No results   | Full match | 31645918.38 | 95525985.7  | 38947613.15 | 27384269.07 | 30116561.62 | 25431278.85 | 15947335.2  |
| Com_1273_po: Boc-beta-cy C9 H14 N2 O4   | 214.0954  | 4.899 | 215.10289 | No results   | No results   | Full match | 121231989.4 | 92240716.32 | 99303425.92 | 136042953.4 | 118361456   | 134664659.5 | 151320902.3 |
| Com_1285_po: o-Phospho-L-C3 H8 N O6 F   | 185.00907 | 1.275 | 186.01622 | No results   | No results   | Full match | 134424394.6 | 16239903.61 | 21148745.98 | 10133903.61 | 39078730.26 | 120699071.7 | 3924305.4   |
| Com_1595_po: Ala-Gln C8 H15 N3 O4       | 217.10626 | 1.376 | 218.11349 | No results   | No results   | Full match | 107277529.9 | 71644763.56 | 58811711.94 | 52133644.9  | 84616674.76 | 63062984.64 | 45094387.29 |
| Com_1817_po: 2'-Deoxycytid C9 H13 N3 O4 | 227.09039 | 1.417 | 228.09749 | No results   | Full match   | Full match | 69038910.72 | 39468651.76 | 62433663.52 | 98614076.07 | 81125659.96 | 76543107.18 | 121536295.8 |
| Com_2065_po: o-Cresol C7 H8 O           | 108.05749 | 8.115 | 109.06468 | No results   | No results   | Full match | 42955005.89 | 44466645.97 | 45244624.33 | 49431415.45 | 44431894.01 | 50247974.26 | 59063619.08 |
| Com_2086_po: Lysop 18:1 C23 H46 N O7    | 479.30121 | 6.655 | 480.30832 | No results   | No results   | Full match | 27165178.64 | 16516973.41 | 3201452.449 | 29365566.41 | 17221532.32 | 25708277.81 | 45383327.98 |
| Com_2204_po: 4-Butylresor C10 H14 O2    | 166.09937 | 5.532 | 167.10678 | No results   | No results   | Full match | 76231128.76 | 66000117.82 | 71903120.67 | 127448417.5 | 87113215.64 | 135104860.2 | 66212722.18 |
| Com_2245_po: alpha-Lactose C12 H22 O11  | 359.14256 | 1.348 | 360.1503  | Invalid mass | Invalid mass | No results | 60598763.85 | 27752477.81 | 94429677.06 | 52986761.07 | 124964198.1 | 74346362.24 | 22724559.58 |
| Com_2307_po: 1-(4-Methoxy C10 H12 O2    | 164.08353 | 5.53  | 165.09097 | No results   | No results   | Full match | 66661667.51 | 52620228.16 | 92947338.52 | 143407458.3 | 103896265.5 | 120550376.2 | 67603745.57 |
| Com_2417_po: L-Adrenaline C9 H13 N O3   | 183.08944 | 5.329 | 184.0968  | No results   | No results   | Full match | 24525429.11 | 50679763.7  | 28010737.87 | 48429016.77 | 31917373.62 | 32042539.42 | 29586838.72 |
| Com_2426_po: Chenodeoxychl C30 H48 O10  | 568.32462 | 6.294 | 569.33221 | No results   | No results   | Full match | 3514447.129 | 3430124.688 | 3450836.584 | 6972874.323 | 2830854.487 | 3287314.655 | 6545637.273 |
| Com_2497_po: all-cis-4,7,C22 H34 O2     | 312.24477 | 6.77  | 313.25217 | Invalid mass | Invalid mass | No results | 29850078.58 | 23743638.09 | 52552550.4  | 40555257.4  | 28458897.18 | 20994193.55 | 29689407.22 |
| Com_2588_po: JNJ-1661010 C19 H19 N5 O   | 365.13198 | 1.393 | 366.13852 | No results   | No results   | Full match | 53812625.3  | 55845788.6  | 80711433.47 | 20725180.32 | 48668520.43 | 39909648.87 | 27490643.22 |
| Com_2717_po: N-(5-Aminop C7 H16 N2 O    | 144.12619 | 1.448 | 145.13354 | No results   | No results   | Full match | 30365966.04 | 20470501.07 | 21207709.14 | 70071541.66 | 27985350.67 | 40421502.24 | 35449339.94 |
| Com_2751_po: D-Glucosamin C6 H14 N O8   | 259.04579 | 1.328 | 260.05304 | No results   | No results   | Full match | 57769872.28 | 44842556.56 | 27065438.16 | 13595889.93 | 39635179.96 | 37991077.53 | 6020492.97  |
| Com_2764_po: gamma-Glutan C10 H18 N2 O  | 278.09366 | 4.874 | 279.10089 | No results   | Full match   | No results | 24412352.84 | 43918902.47 | 21818639.33 | 6982163.075 | 23336743.86 | 22189192.79 | 17735729.7  |
| Com_2907_po: Feruloyl Put C14 H20 N2 O  | 264.1473  | 5.481 | 265.15497 | No results   | No results   | Full match | 43843049.54 | 26570190.63 | 28678502.19 | 21999482.66 | 36209221.92 | 31768167.29 | 19331049.84 |
| Com_2952_po: 5-Methylcyt C5 H7 N3 O     | 125.05897 | 1.414 | 126.06612 | No results   | No results   | Full match | 16787243.74 | 28707429.75 | 24482049.97 | 28110976.04 | 19494743.64 | 25136224.26 | 32201145.55 |
| Com_3104_po: 10-Undecenoic C11 H20 O2   | 184.14628 | 6.424 | 185.15366 | No results   | No results   | Full match | 49378003.81 | 32701565.54 | 27329367.52 | 70760043.65 | 54410692.58 | 52520041.2  | 42870951.85 |
| Com_3107_po: Dehydrochole C24 H34 O5    | 402.23855 | 6.345 | 403.24564 | Invalid mass | Invalid mass | No results | 49271561.23 | 38689097.35 | 40189484.64 | 49826701.94 | 41079543.73 | 55294657.63 | 6673963.943 |
| Com_3277_po: Cycloctydid C9 H11 N3 O4   | 225.07492 | 1.426 | 226.08212 | No results   | No results   | Full match | 46004217.29 | 15669634.55 | 17119368.64 | 22214518.06 | 38589388.06 | 35778474.89 | 11208688.43 |
| Com_3312_po: N-[4-(trif C17 H16 F3 N    | 290.09035 | 5.014 | 291.09827 | Invalid mass | No results   | No results | 23607564.14 | 14993047.13 | 8032957.491 | 27726155.67 | 8992883.47  | 18401841.84 | 58893105.97 |
| Com_3398_po: 1-Methylhist C7 H11 N3 O2  | 169.08468 | 1.41  | 170.09216 | No results   | No results   | Full match | 33374148.19 | 51507039.25 | 45398245.64 | 29899533.82 | 36552146.68 | 41049764.59 | 29300847.71 |
| Com_3483_po: Purine C5 H4 N4            | 120.04363 | 2.834 | 121.05087 | Full match   | No results   | Full match | 22130075.99 | 976522.2882 | 1563039.072 | 1470706.581 | 3814579.98  | 20695580.61 | 344894.8281 |
| Com_3501_po: Inosine C10 H12 N4 O       | 268.08097 | 4.956 | 269.08789 | No results   | No results   | Full match | 42334222.8  | 7375241.185 | 13800143.99 | 5256663.745 | 39089548.39 | 18396553.59 | 3201297.503 |
| Com_3540_po: 4-Methoxycir C10 H10 O3    | 178.06251 | 5.492 | 179.06979 | No results   | No results   | Full match | 15483973.76 | 20748261.36 | 20640726.1  | 34252471.99 | 35818791.3  | 23804605.63 | 54171125.84 |
| Com_3609_po: Asp-Phe C13 H16 N2 O       | 280.10503 | 5.336 | 281.1123  | No results   | No results   | Full match | 35967960.87 | 28356022.87 | 28441343.5  | 66374047.91 | 36800837.06 | 48303094.52 | 52978229.61 |
| Com_3781_po: Epinephrine C13 H19 N O2   | 333.10586 | 1.436 | 334.11307 | No results   | No results   | Full match | 38870587.19 | 17478904.28 | 44824185.8  | 25266957.71 | 33486951.39 | 19013074    | 13473073.39 |
| Com_4000_po: 2-(Dimethyl C12 H17 N5 O   | 311.12155 | 1.441 | 294.11823 | No results   | No results   | Full match | 22704010.47 | 24195747.66 | 26296432.12 | 47288738.39 | 40066698.87 | 30840967.31 | 33539738.47 |
| Com_4169_po: Methyl alpha C7 H14 O6     | 194.07916 | 1.436 | 195.08653 | No results   | No results   | Full match | 29917232.58 | 14295936.29 | 17074522.39 | 43224212.6  | 32640078.01 | 16844463.05 | 13701812.49 |
| Com_4459_po: L-beta-Imid C6 H8 N2 O3    | 156.05369 | 1.368 | 157.06099 | No results   | No results   | Full match | 22373920.26 | 6319737.332 | 10400426.99 | 13918146.54 | 17068269.28 | 9584413.93  | 13680086.04 |
| Com_4556_po: 5-Hydroxytry C11 H12 N2 O  | 220.08476 | 4.985 | 221.09187 | Full match   | No results   | Full match | 25476870.57 | 13285725.7  | 25125318.78 | 31831022.06 | 39203578.64 | 58143259.01 | 18241475.23 |

|                                       |           |       |           |              |              |            |             |             |             |             |             |             |             |
|---------------------------------------|-----------|-------|-----------|--------------|--------------|------------|-------------|-------------|-------------|-------------|-------------|-------------|-------------|
| Com_4645_po:N4-AcetylcytC11 H15 N3 (  | 285.09562 | 1.416 | 286.10272 | No results   | No results   | Full match | 25637892.87 | 20020397.86 | 29685113.96 | 54457291.04 | 31297674.78 | 26789299.17 | 22027101.11 |
| Com_4795_po:L-Leucyl-L-L-C9 H18 N2 O  | 202.13187 | 1.286 | 203.13902 | No results   | No results   | Full match | 28834935.34 | 2391800.265 | 3375407.095 | 2843756.776 | 13165767.65 | 16060655.37 | 5609071.21  |
| Com_4906_po:L-Alanyl-L-I-C9 H19 N3 O  | 217.1428  | 1.232 | 218.15019 | No results   | No results   | Full match | 13917995.55 | 15956107.46 | 12035226.77 | 5032005.243 | 18006013.57 | 10489848.75 | 16614999.87 |
| Com_5037_po:Delta-TridecC13 H24 O2    | 212.17766 | 8.733 | 213.18495 | No results   | No results   | Full match | 26959783.82 | 16133688.8  | 9591661.428 | 19777551.35 | 13671497.25 | 13219973.69 | 11000843.64 |
| Com_5270_po:Methyltesto:C20 H30 O2    | 302.22444 | 6.823 | 303.23151 | No results   | No results   | Full match | 18553591.91 | 11654963.38 | 20500577.1  | 13611297.78 | 12127533.06 | 16350937.02 | 13160279.25 |
| Com_5518_po:L-Glutamate C5 H9 N O4    | 147.05307 | 2.214 | 148.06035 | No results   | No results   | Full match | 23903803.42 | 7922531.809 | 11732213.8  | 9228977.478 | 12039718.69 | 21811313.63 | 4099327.507 |
| Com_5636_po:Maltotetrao:C24 H42 O21   | 688.20294 | 1.403 | 689.21027 | Invalid mass | Invalid mass | No results | 1918181.005 | 19881633.69 | 25574356.23 | 54396681.89 | 22321802.27 | 13057306.7  | 3996710.334 |
| Com_5875_po:Quinic acid C7 H12 O6     | 192.06404 | 1.33  | 193.07085 | No results   | No results   | Full match | 21842655.94 | 14898470.78 | 5419412.268 | 11363296.69 | 20530883.25 | 14754529.06 | 18732398.38 |
| Com_5926_po:L-KynurenineC10 H12 N2 (  | 208.08474 | 4.772 | 209.09177 | No results   | No results   | Full match | 11011735.58 | 23083700.48 | 13057746.48 | 17007749.2  | 16509413.39 | 16794036.52 | 16582015.8  |
| Com_6461_po:2-MethylbutC12 H23 N O    | 245.1627  | 5.209 | 246.1701  | No results   | No results   | Full match | 3802261.931 | 5972802.237 | 7909263.734 | 14680369.76 | 6510069.352 | 4846743.899 | 24706005.27 |
| Com_6723_po:H-Gly-Pro-OH C7 H12 N2 O  | 172.08469 | 1.646 | 173.09195 | No results   | No results   | Full match | 16873303.66 | 23108968.09 | 22742260.83 | 24714384.06 | 24037054.86 | 19779017.74 | 8599227.878 |
| Com_6764_po:Tyr-Tyr C18 H20 N2 (      | 344.13732 | 4.993 | 345.14468 | No results   | Full match   | No results | 2604063.765 | 4263015.982 | 2992754.773 | 3759752.768 | 2351893.162 | 3583397.087 | 2451802.44  |
| Com_7511_po:Anserine C10 H16 N4 (     | 240.12175 | 1.408 | 241.1292  | No results   | No results   | Full match | 10614984    | 11933402.76 | 15948366.2  | 19192133.97 | 19123047.84 | 19440475.49 | 17209677.63 |
| Com_7815_po:L-TryptopharC11 H12 N2 (  | 204.08939 | 5.679 | 205.09608 | No results   | No results   | Full match | 4785922.457 | 6557513.786 | 5360321.833 | 10316428.73 | 7209722.114 | 5618910.037 | 5728212.714 |
| Com_7963_po:N-Acetyl-L-n C7 H13 N O3  | 191.06166 | 5.136 | 192.06923 | No results   | No results   | Full match | 14184865.65 | 8843745.261 | 8164471.056 | 15745548.91 | 16948229.07 | 8749643.564 | 14252274.35 |
| Com_8377_po:2-HydroxybutC4 H8 O3      | 104.04731 | 1.331 | 105.05457 | No results   | No results   | Full match | 10958849.49 | 934606.3112 | 4921117.214 | 20952810.12 | 22058000.85 | 11761203.29 | 8134553.242 |
| Com_9219_po:ProstaglandiC20 H32 O6    | 368.21955 | 6.651 | 391.20862 | No results   | No results   | Full match | 7344323.737 | 4683067.969 | 7776249.105 | 9962228.318 | 7723993.635 | 7994897.374 | 9589903.438 |
| Com_9321_po:HydrocortisoC21 H30 O5    | 362.20796 | 6.821 | 363.21524 | No results   | No results   | Full match | 8859723.216 | 5157048.453 | 7003641.552 | 9230685.732 | 7056855.45  | 7371758.046 | 7886782.372 |
| Com_9875_po:N2-MethylguaC11 H15 N5 (  | 297.10733 | 4.817 | 298.1145  | No results   | Full match   | Full match | 7403969.284 | 6862558.353 | 5540838.166 | 4939489.934 | 7922808.193 | 2543284.077 | 6557353.54  |
| Com_10231_po:Lysopa 16:0 C19 H39 O7 F | 410.24237 | 6.848 | 411.24887 | No results   | No results   | Full match | 9210695.439 | 2275259.138 | 2666084.159 | 7931844.68  | 2447548.427 | 2388221.933 | 10385428.1  |
| Com_10307_po:2,3-Dinor-T)C18 H30 O6   | 342.20279 | 5.695 | 343.20984 | No results   | No results   | Full match | 9608039.516 | 8426587.865 | 9029188.651 | 13906263.15 | 10323801.68 | 7008848.335 | 9916513.266 |
| Com_10730_po:LysoPC 12:1 C20 H36 N O  | 433.22125 | 5.343 | 434.22867 | No results   | No results   | Full match | 3680025.472 | 7403495.635 | 8612994.615 | 13252345.73 | 7539760.628 | 6966810.957 | 11631134.86 |
| Com_10829_po:AdrenosteroC19 H24 O3    | 300.17229 | 5.647 | 301.17996 | No results   | No results   | Full match | 8161466.035 | 4856049.771 | 11336012.76 | 11837206.91 | 7803911.12  | 16683084.94 | 5124099.816 |
| Com_12064_po:Thymopentin C30 H49 N9 ( | 679.36458 | 5.124 | 680.36975 | No results   | No results   | Full match | 601375.848  | 11536288.8  | 2335709.312 | 2341918.999 | 4248046.673 | 10672937.84 | 525381.5377 |
| Com_12168_po:11-KetoetiC19 H28 O3     | 304.20367 | 7.773 | 305.21112 | No results   | No results   | Full match | 7299357.989 | 5389292.978 | 3283521.638 | 6122268.362 | 9084499.353 | 11036633.21 | 3744444.821 |
| Com_14669_po:19-Nortesto:C18 H26 O2   | 274.19236 | 5.721 | 275.1994  | No results   | No results   | Full match | 4479685.126 | 4063480.175 | 6064500.211 | 10835403.01 | 6774961.648 | 7559094.36  | 6674240.465 |
| Com_15078_po:GlycoursodeC26 H43 N O   | 449.3129  | 5.687 | 450.32031 | No results   | No results   | Full match | 4672450.722 | 3525178.464 | 4133940.131 | 2478297.702 | 4624595.392 | 4819362.62  | 6149149.155 |
| Com_15857_po:Acetylcysteic5 H9 N O3   | 163.03008 | 1.417 | 164.03728 | No results   | No results   | Full match | 3860723.565 | 2450378.091 | 5070158.951 | 4834294.72  | 4570238.686 | 8522305.786 | 3650513.852 |
| Com_16055_po:Pyridoxine (C14 H21 N O  | 331.12673 | 1.413 | 332.13412 | No results   | No results   | Full match | 3998542.437 | 2050787.713 | 2985171.824 | 6392540.285 | 4378522.751 | 8236156.194 | 5518667.854 |

| pos_OL_HW2  | pos_OL_HW3  | pos_OL_HW4  | pos_OL_HW5  | pos_OL_HW6  | pos_OL_HWM1 | pos_OL_HWM2 | pos_OL_HWM3 | pos_OL_HWM4 | pos_OL_HWM5 | pos_OL_HWM6 | pos_QC1     | pos_QC2     | pos_QC3     |
|-------------|-------------|-------------|-------------|-------------|-------------|-------------|-------------|-------------|-------------|-------------|-------------|-------------|-------------|
| 15274000740 | 21508063995 | 19268495148 | 6361237445  | 9753069201  | 13639832805 | 19165228029 | 25412791834 | 20147140941 | 16341012326 | 11188519033 | 22850917432 | 23115968183 | 24095495258 |
| 2229145512  | 7329035316  | 7614478080  | 1681463626  | 2349725463  | 3361260698  | 4164486344  | 1805208733  | 11757114777 | 8848630309  | 5489238817  | 5948896483  | 6091394397  | 5635126304  |
| 4922771471  | 2399758950  | 3655667151  | 3732936341  | 5848761519  | 3255324837  | 5859957174  | 5011123764  | 3450826806  | 3846064511  | 4600715700  | 4417821835  | 4091069052  | 2836536720  |
| 2740099358  | 2336075519  | 3473605794  | 3823800474  | 5961042530  | 2992709358  | 836796230.5 | 4757021603  | 3563731634  | 3839573983  | 4524499585  | 2298916448  | 3875565650  | 2721165481  |
| 1607456619  | 2944366037  | 1738037959  | 494874446.9 | 918531973.3 | 1225268815  | 1238263638  | 3315987745  | 1456722840  | 1761088383  | 690660528.3 | 3781741772  | 2521035797  | 2240196787  |
| 1321574889  | 2556403357  | 1302138906  | 1267837805  | 1751547858  | 585991004.4 | 2131889058  | 437199315.9 | 1469346665  | 1243636528  | 5141502681  | 1505708193  | 1254276093  | 1295662294  |
| 2345701474  | 1508747111  | 3109755114  | 3203613221  | 5575242834  | 1504574123  | 4629510549  | 2213714206  | 1521114955  | 2063727386  | 3546652108  | 2010532905  | 3514064673  | 2105481111  |
| 2309959564  | 982661750.2 | 1925316225  | 3203300020  | 2119829408  | 1828195848  | 5143384109  | 1754597423  | 1181615191  | 1299678001  | 3855472086  | 1602131501  | 2109453450  | 2358514418  |
| 1858632040  | 570505550.2 | 1294361662  | 1077786134  | 1448200673  | 1921876577  | 2244336925  | 2129383226  | 851011287.3 | 701214579.2 | 214946288.1 | 1340295338  | 1529102967  | 1771577140  |
| 4173108.942 | 13749371.12 | 10777262.76 | 2458260.01  | 45432330.81 | 109022697.5 | 5446927.122 | 1102103273  | 6370946.8   | 5129317.9   | 3819313.707 | 6850011.291 | 6049000.763 | 7504070.888 |
| 956636706.9 | 1667241274  | 1956220750  | 1606326761  | 2018712749  | 1423502099  | 3927444227  | 1392315958  | 1910552322  | 1637459548  | 2861938774  | 1498631749  | 1836472908  | 1934368979  |
| 512663611.2 | 54661939.67 | 221342240.2 | 45076531.66 | 47961017.56 | 55800043.85 | 47947662.37 | 62999279.14 | 80199082.1  | 180090146.3 | 178011529.2 | 273910349.9 | 318759663.4 | 378940032.6 |
| 610373906.1 | 1438251690  | 1816274623  | 560199888.6 | 1106161563  | 2085753075  | 1459488482  | 1897440565  | 2482294154  | 2411506549  | 1110971847  | 1233457885  | 1606462366  | 1865412690  |
| 1339906941  | 861192187.3 | 933548236.9 | 1921582873  | 1201710482  | 981235908.6 | 2390224615  | 737121105   | 535128704.2 | 397178177.5 | 1900889612  | 900188325.3 | 1113745989  | 1215274452  |
| 1166162619  | 781120415   | 790646160.4 | 1410767881  | 954061452.1 | 1132153704  | 2810002907  | 1081228058  | 646158317.5 | 709859132.9 | 1558879604  | 1209972263  | 1006717079  | 1224972984  |
| 172710874.4 | 301289902.6 | 127920194   | 189231160   | 375845828.1 | 428637935.1 | 252297250.7 | 462561540.7 | 225550479.7 | 66202081.36 | 93169814.98 | 549282314.4 | 419957944.2 | 337044718.6 |
| 775899888.7 | 214744407.8 | 178586116.5 | 82668243.69 | 100351773.1 | 59966182.06 | 155713752.7 | 85660141.39 | 205241402.2 | 94928370.46 | 83191038.45 | 253598369.3 | 191226865   | 185725715.1 |
| 379823279   | 773325661.9 | 439661887.6 | 432686783.6 | 322488338.6 | 343350680   | 434884523.3 | 216244905.5 | 596390800.1 | 659187754.9 | 795038621.3 | 444366344.7 | 417632999.1 | 449087301.1 |
| 555492481.8 | 404908802.6 | 142334870.9 | 379166540.7 | 740178686.5 | 536978583.6 | 220905745.4 | 747742632.6 | 148378077.8 | 392957699.3 | 120112436.7 | 360615852.9 | 513719681.7 | 441538050.4 |
| 497613072   | 392226074.8 | 475663980.9 | 537046530.9 | 573790256   | 393688901.9 | 1135700833  | 244123023.7 | 406419694.7 | 237674890.7 | 734505246.2 | 340860414.2 | 435831959   | 454367032.2 |
| 15822704.57 | 209308148.5 | 1086805793  | 77717794.38 | 84149026.3  | 289220800.5 | 187067035.6 | 216763907.4 | 330736170.3 | 466644981.1 | 309542689.6 | 168579234   | 229677440.1 | 228999264.4 |
| 399158567.2 | 123460819.9 | 127417147.4 | 159622713.9 | 72937962.53 | 206449553.9 | 354438803.5 | 71028931.55 | 32920049.13 | 32880592.8  | 234736581.1 | 131399900.9 | 182966417.3 | 202857932.6 |
| 110507018.6 | 182446380.9 | 112579524.9 | 166752090.4 | 246222145.8 | 95243313.87 | 333781757.8 | 75180756.08 | 94192894.51 | 76342210.77 | 360417901.2 | 127163005.1 | 120077181.5 | 132770028.8 |
| 300314102.1 | 436811084.9 | 492815023.7 | 339903454.1 | 501404775   | 454283697.4 | 426537114.6 | 392967774.2 | 671044908.5 | 612597655.3 | 472433990.6 | 292662875.6 | 414915519.1 | 443840028.5 |
| 391072073.5 | 33188445.34 | 42242450.73 | 15882334.97 | 17401680.07 | 60502467.27 | 29322828.62 | 53784718.3  | 21914795.6  | 80715344.13 | 18913883.85 | 80232373.27 | 75004924.8  | 73740738.55 |
| 25282635.51 | 157635241.6 | 105449821.3 | 35740522.78 | 65508079.24 | 76832204.96 | 46980387.75 | 79881236.32 | 155978841.3 | 207991503.3 | 86687078.54 | 158901695.6 | 106540499.3 | 115575892.1 |
| 194595483.2 | 266139046   | 175790063.4 | 138329660   | 197752539.9 | 193366941.4 | 145988199.2 | 184474598.2 | 202920330.8 | 242597536.8 | 214159651.5 | 212665609.7 | 252119112.6 | 258107852.9 |
| 111608361.2 | 82834568.81 | 81204871.25 | 50190709.69 | 57190810.6  | 129784713.4 | 71536925.31 | 123659232.2 | 73377975.56 | 84491014.76 | 62232249.88 | 164502386.7 | 143113204.4 | 139223502.2 |
| 327873341.4 | 132367534.2 | 190731395.5 | 217049623   | 205136224.2 | 210218305.3 | 140875237.1 | 187201048.3 | 85598372.75 | 60714749.44 | 185311228.8 | 166338506.5 | 182134152.5 | 182175116.9 |
| 294000815.9 | 6284419.444 | 12887057.05 | 6562404.569 | 5226398.42  | 33629822.88 | 29006055.69 | 42900896.74 | 13078259.65 | 11099804.02 | 8140204.925 | 36457431.47 | 33408177.8  | 35587183.54 |
| 21431909.32 | 6401626.282 | 13915263.51 | 7619686.884 | 8087435.455 | 16588861.88 | 12688277.98 | 27302550.57 | 11724983.33 | 10716391.89 | 16958219.52 | 29096886.24 | 40652751.83 | 44287088.56 |
| 56782954.75 | 118922628.8 | 58633692.85 | 42712596.55 | 31016905.25 | 72516352.99 | 30607858.91 | 106151909.2 | 68909747.74 | 487138012   | 37499182.79 | 131026481   | 89782853.51 | 74918652.94 |
| 117566039.8 | 148482651.2 | 61977921.27 | 110804208.9 | 138150262.7 | 118034066.8 | 67506658.15 | 161693695.1 | 67479375.35 | 140499833.4 | 45180351.12 | 153380941.6 | 115972243.9 | 135943446.7 |
| 76963016.63 | 195438074.4 | 175361741.4 | 96053238.5  | 119390405   | 184219455.5 | 167721889.6 | 163644369.6 | 161406220.3 | 161703692.8 | 99292705.96 | 166128668.2 | 151721920.6 | 195865293.3 |

|             |             |             |             |             |             |             |             |             |             |             |             |             |             |
|-------------|-------------|-------------|-------------|-------------|-------------|-------------|-------------|-------------|-------------|-------------|-------------|-------------|-------------|
| 43652077.5  | 142317406.1 | 284363917.9 | 80652628.72 | 54254299.13 | 59374720.97 | 141942935.7 | 69046619.08 | 431038998.5 | 290310641.8 | 212080858   | 230377404.3 | 146440878.9 | 152074397.8 |
| 63098865.59 | 232879725.8 | 85676077.6  | 47115604.38 | 71107161.26 | 38735406.89 | 104106762.7 | 10061831.72 | 132518062.4 | 67257920.36 | 137301016.9 | 85453001.16 | 70737318.71 | 77793842.93 |
| 128183094.4 | 27288600.35 | 74120079.92 | 40360288.68 | 29207093.63 | 68620287.8  | 37493593.64 | 47514157.32 | 57463227.34 | 70190191.95 | 47873596.04 | 150300654.9 | 96564535.38 | 86172555.53 |
| 84831735.94 | 31215144.7  | 170709209.8 | 77504127.92 | 99865787.41 | 173474189   | 123890382.8 | 193882016.9 | 67397337.83 | 244651629.1 | 130515179.6 | 117022823.9 | 164341044.2 | 232271000.1 |
| 32191097.18 | 183674684.4 | 71936219.1  | 27834382.11 | 55378774.97 | 52482153.2  | 72220907.29 | 90009227.15 | 41287011.22 | 99888200.45 | 40420407.9  | 167546064.3 | 103288615.8 | 87945518.43 |
| 63616481.13 | 135168167.4 | 144815079.5 | 80554886.76 | 166979056.3 | 75500241.28 | 152050551.9 | 46197208.83 | 196773649.2 | 128609834   | 136262688.9 | 144223291.7 | 118569255.6 | 100659143.3 |
| 70238425.09 | 139721126.3 | 166403534.3 | 66417929.63 | 108853149.2 | 125270540.5 | 236644645.7 | 155153921.7 | 148998635.2 | 176479223.6 | 136063088.5 | 139312557.1 | 140348012.4 | 123095605.9 |
| 66759666.95 | 78765687.03 | 83385200.24 | 37085560.89 | 47246826    | 46313688.98 | 47864039.76 | 22144092.96 | 67776852.74 | 80968978.45 | 79749496.19 | 83042770.99 | 70083329.99 | 71470601.47 |
| 19774838.59 | 36027792.09 | 55062855.79 | 11098742.1  | 15831555.52 | 20643949.89 | 46963150.39 | 12333075.13 | 73650601.26 | 50773247.76 | 84589975.37 | 58840632.18 | 41992248.84 | 46571737.69 |
| 71962327.95 | 108411081.8 | 67762720.56 | 28405682.91 | 37137488.25 | 42855405.95 | 81595776.31 | 36616671.2  | 114098365.8 | 115300257.2 | 113711307.8 | 102311938.5 | 69717409.56 | 78262972.83 |
| 113127392.3 | 139606947.4 | 125944112.1 | 44499875    | 71356034.32 | 152038188.4 | 85233934.85 | 114859529.9 | 168661490.8 | 94984046.3  | 82029363.65 | 113198339.2 | 102218121.5 | 105287357.1 |
| 32978793.96 | 112390776.2 | 97922777.99 | 32950828.47 | 48717175.64 | 52137928.87 | 52103320.49 | 23362025.04 | 162548238   | 85598140.68 | 104531227.2 | 62934910.25 | 78420507.58 | 83565245.2  |
| 47027374.94 | 53668398.99 | 19280496.13 | 13880110.2  | 20517161.51 | 56780555.8  | 23933097.99 | 30546949.78 | 28003363.12 | 30828741.99 | 32141642.2  | 62386686.46 | 46008304.91 | 43378863.92 |
| 37155079.78 | 48736866.6  | 47192883.78 | 73628526.7  | 125096407.6 | 63911223.28 | 190317405.6 | 82442424.35 | 22433747.68 | 43816691.37 | 50077490.39 | 57571784.84 | 56963061.15 | 60745063.67 |
| 37221957.87 | 39781899.08 | 67894833.33 | 56884903.36 | 124233098.5 | 36696063.59 | 61851476.07 | 9501567.989 | 56394471.07 | 52286874.53 | 72129641.14 | 56860502.48 | 51707418.96 | 67540265.22 |
| 15229739.98 | 22847697.67 | 56668201.28 | 28443148.71 | 25085238.17 | 28027448.44 | 38227950.04 | 25813600.49 | 48527328.2  | 59087408.63 | 45831307.02 | 39028011.14 | 51477049.33 | 54140871.76 |
| 54245772.55 | 49498581.65 | 72538737.53 | 47392946.8  | 51121687.27 | 60130285    | 129173190   | 48243418.03 | 70000466.08 | 52403330.27 | 61323050.98 | 82201749.48 | 69871209.36 | 73515634.92 |
| 15293555.54 | 89791953.82 | 110494124   | 30313384.61 | 65920538.78 | 76280190.76 | 41102456.37 | 72997467.6  | 66282850.41 | 60388393.99 | 29562693.61 | 38321619.59 | 44128037.16 | 56190184.07 |
| 9400146.963 | 10800646.74 | 30008545.2  | 10558008.46 | 15257116.15 | 16386969.74 | 26441041.39 | 13894118.83 | 22616872.05 | 31006555.42 | 16820669.89 | 26498031.53 | 22581195.7  | 24743613.39 |
| 34841040.52 | 12836274.36 | 24552527.99 | 3824881.952 | 7068916.359 | 36532925.47 | 43666258.64 | 15011509.54 | 8993621.955 | 56350345.98 | 6686146.409 | 43002840.37 | 28959381.93 | 30394764.51 |
| 48423368.66 | 24870471.35 | 31425707.89 | 59511565.03 | 74287508.86 | 30843838.62 | 83792554.39 | 26268025.75 | 28387213.52 | 30821728.97 | 82066745.31 | 49174258.28 | 44388858.65 | 67672961.23 |
| 30058293.76 | 973210.9732 | 2332775.077 | 471467.5226 | 8398074.775 | 5470336.641 | 4126434.722 | 6191516.684 | 2464411.42  | 1992875.303 | 401777.4885 | 15693222.31 | 15839138.66 | 16545286.28 |
| 1202775.056 | 4559930.361 | 1860728.41  | 1085865.79  | 1700491.906 | 1686344.964 | 1230933.598 | 5798353.786 | 3146829.4   | 2395990.794 | 1399816.815 | 20955339.32 | 14941669.78 | 15048787.48 |
| 16423443.74 | 16025470.35 | 25900239.06 | 8030082.326 | 19566894.98 | 23135358.3  | 32086908.99 | 17596318.95 | 23301052.06 | 33696752.49 | 37706399.39 | 31928938.57 | 35223682.94 | 47441003.05 |
| 29005288.86 | 43574066.79 | 65623818.23 | 22492165.27 | 33115815.36 | 30657553.39 | 34032983.6  | 61878748.3  | 46955034.93 | 24134629.89 | 18845870.19 | 45798819.46 | 41068262.55 | 51332041.66 |
| 24065335.91 | 31365574.67 | 39892663.11 | 20240484.64 | 35032519.52 | 42992593.2  | 35604189.82 | 50154938.01 | 74933490.62 | 59521892.91 | 36126402.15 | 37477749.96 | 44850759.38 | 63431287.08 |
| 27289386.93 | 49443186.67 | 20992324.03 | 10736773.62 | 17003282.29 | 15116368.43 | 20393883.51 | 43296510.38 | 16054163.33 | 15765647.49 | 24313555.22 | 34455579.73 | 25812764.32 | 24774049.65 |
| 8082044.799 | 5474504.109 | 29407462.2  | 1788795.656 | 2829425.093 | 10823839.78 | 9868680.597 | 13909600.03 | 8382585.015 | 4070513.605 | 2924168.833 | 20861913.23 | 11664339.3  | 11693306.35 |
| 10708251.18 | 4317516.694 | 4240885.553 | 7881221.685 | 11747977.36 | 21654515.63 | 5214270.526 | 12881518.95 | 21399723.12 | 31234986.47 | 13303871.12 | 16051110.94 | 15783153.3  | 19275286.29 |
| 35741444.14 | 34683052.43 | 41833504.72 | 31882998.64 | 54934435.12 | 77791960.79 | 44619369.18 | 67270099.56 | 73886175.9  | 67513753.82 | 39960580.93 | 41906100.49 | 50408427.82 | 62005542    |
| 37575562.49 | 44168083.27 | 32518325.14 | 23299059.18 | 44738729.08 | 26432691.66 | 39408640.42 | 68038740.88 | 18592902.79 | 13701145.82 | 23644180.5  | 40576432.81 | 30952439.44 | 26257082.46 |
| 11765754.87 | 40644562.44 | 49983302.47 | 18897683.12 | 41902191.03 | 44574238.88 | 33020325.97 | 48439337.02 | 75244805.61 | 33687684.83 | 21306364.38 | 23070684.71 | 36864662.54 | 42122064.02 |
| 13764809.94 | 32871151.58 | 29113213.26 | 14680303.53 | 33765139.72 | 11255413.7  | 18575527.74 | 46719658.74 | 35672533.78 | 34395054.23 | 13478449.58 | 39661700.09 | 30516816.28 | 33375871.55 |
| 14975429.71 | 12910995.55 | 15991519.31 | 8470156.492 | 12929329.53 | 48468576.55 | 35609268.63 | 31240020.06 | 17229800.32 | 25418209.14 | 23687582.41 | 20790378.44 | 26794468.06 | 27628095.48 |
| 7412913.648 | 16463230.76 | 19068302.66 | 17445685.64 | 26492074.95 | 31912909.55 | 31565863.32 | 34411115.02 | 20483936.07 | 46851912.26 | 14309673.38 | 28944737.53 | 21724888.2  | 23775975.35 |

|             |             |             |             |             |             |             |             |             |             |             |             |             |             |
|-------------|-------------|-------------|-------------|-------------|-------------|-------------|-------------|-------------|-------------|-------------|-------------|-------------|-------------|
| 2911629.249 | 11900064.8  | 14271432.49 | 1295937.787 | 1687536.685 | 3732770.87  | 2678569.904 | 1384189.599 | 28480500.82 | 13378520.91 | 22240335.03 | 13130056.64 | 9567193.253 | 16003570.42 |
| 7135681.731 | 9866609.118 | 4332652.495 | 2175417.106 | 3444865.517 | 15051578.01 | 6595485.236 | 26838830.24 | 7929899.162 | 3910987.199 | 4095702.493 | 20361524.96 | 13411258.09 | 11158543.49 |
| 12803087.37 | 15784496.69 | 20892352.84 | 16496297.5  | 14248159.51 | 52314869.75 | 24962769.43 | 10038647.97 | 21607203.3  | 21472041.53 | 17841969.56 | 25377546.74 | 20288022.97 | 22942985.13 |
| 10298938.93 | 25711191.81 | 24235221.16 | 8515760.83  | 14348262.51 | 28363063.04 | 21915383.55 | 33972336.61 | 39748105.63 | 30694415.25 | 14946832.86 | 18170671.78 | 24294302.32 | 27608288.84 |
| 20967068.98 | 4004126.567 | 3700336.959 | 1232948.734 | 1326632.118 | 46376601.26 | 2491913.032 | 4118043.587 | 3494072.858 | 4227354.588 | 1571571.736 | 8218220.261 | 6721274.521 | 6801897.355 |
| 20339153.96 | 567651.595  | 528706.9263 | 371998.8186 | 313643.2874 | 271057.8145 | 491811.6689 | 1193753.713 | 1671273.493 | 1439508.013 | 2437832.539 | 2331806.442 | 2438528.816 | 2114507.421 |
| 4790866.166 | 1637520.789 | 1048048.114 | 7179862.708 | 8255688.265 | 2664819.065 | 6598099.859 | 1413293.23  | 1331076.287 | 1552486.221 | 2504206.608 | 11060290.56 | 5952737.821 | 8088251.993 |
| 4716450.874 | 20143207.52 | 8799801.546 | 3488617.424 | 6470284.181 | 5376698.854 | 7821429.002 | 22911174.71 | 6514934.241 | 6510811.169 | 6286017.826 | 16430562.14 | 10062545.43 | 10448313.83 |
| 6239415.681 | 19985594.55 | 19391698.17 | 8232863.512 | 8362714.65  | 11338820.02 | 11737629.05 | 21736032.93 | 19877643.01 | 17492857.77 | 9566222.677 | 18019842.95 | 11483568.71 | 13217210.7  |
| 2420593362  | 9422068723  | 4495656440  | 1546466134  | 1185331667  | 4610172179  | 5305269740  | 3634036815  | 13872438448 | 8652693264  | 9423633440  | 11230293577 | 7656034886  | 8534433460  |
| 10251557263 | 3729791846  | 5391455688  | 12496705812 | 8236022526  | 5792172081  | 18129125782 | 4825720051  | 2502359141  | 2371028695  | 12371134830 | 5964185264  | 6419615564  | 7451594312  |
| 2928865921  | 9366135761  | 4494433736  | 1839884742  | 2806071707  | 1872949476  | 4706793397  | 1063389308  | 10512606706 | 9169578002  | 11063951668 | 4807786940  | 4105534810  | 4380934330  |
| 3330180367  | 2345976910  | 3018339736  | 4305674624  | 3237967609  | 2123272735  | 7067238162  | 1500467394  | 1475764271  | 1384912161  | 5736550769  | 3976407662  | 2839318385  | 2970067871  |
| 2273021232  | 965667077.5 | 1892115421  | 3148205517  | 2086679645  | 1795375797  | 5055720503  | 1726722347  | 1161800274  | 1273647889  | 3790395927  | 1575270224  | 2075590308  | 2322215849  |
| 1823012965  | 1433524583  | 2746675902  | 1099577119  | 860135460.8 | 1577273855  | 2755182641  | 1763339993  | 1067324963  | 1762557582  | 1403850137  | 1927223564  | 1887655568  | 2125721731  |
| 1725420475  | 1680459786  | 1279986909  | 3107721636  | 551315106.5 | 1363822486  | 3981889017  | 788220768.3 | 361594667   | 50120894.32 | 1336413998  | 2445850589  | 1722953895  | 1639505427  |
| 1746919877  | 774267.0114 | 813762.3534 | 1909552.899 | 514867.7854 | 727802.782  | 643236.7562 | 664593.141  | 592261.0889 | 559326.1493 | 403551.1509 | 3573836.273 | 3614274.948 | 4523650.364 |
| 951827980.9 | 467223841.9 | 671861992   | 1115477058  | 779130438.3 | 763295245.5 | 3160320341  | 690293281.3 | 279390267.5 | 277611316.1 | 1038153544  | 635081126.1 | 907349175.2 | 928125800.3 |
| 570614568   | 661976996.9 | 427996709.4 | 309564138.2 | 301858176.9 | 397746598   | 506200422.7 | 491345205.6 | 441647793.9 | 584236497.4 | 643031772.2 | 687626303.8 | 522603416.8 | 689515705.5 |
| 481679087.3 | 1143596897  | 1424454482  | 460536532.8 | 822987496.3 | 1498597230  | 1141447104  | 1531680282  | 1874954962  | 1925483159  | 903446340.5 | 1103875040  | 1312986781  | 1397939532  |
| 108465927.3 | 181757636.7 | 1092288254  | 165071463.1 | 1223546775  | 738980220.3 | 2574966575  | 535574339   | 575315440.7 | 398178840.7 | 358134964.1 | 1043581075  | 1015056302  | 1118766849  |
| 404233139.4 | 1059300224  | 796867469.2 | 639897304.4 | 327485916.2 | 521192284.1 | 631523040.1 | 330330628.8 | 731718481   | 695614728.7 | 625027047.9 | 450694369.1 | 572034602.4 | 504610966.4 |
| 95461507.6  | 1032232399  | 142768110.1 | 704127407.5 | 1272580637  | 714013193.2 | 440352134.2 | 197143879.7 | 219844544.9 | 855236136   | 64466744.48 | 598962455.4 | 540974318.1 | 485927401.8 |
| 709737311.5 | 120714106.9 | 175479992.8 | 832858646.3 | 1175615579  | 315099494.9 | 1615145541  | 261931664.1 | 46002001.56 | 167856530.1 | 471875311.2 | 478651245.1 | 390778938.6 | 396675358.4 |
| 250722917.6 | 620469675.8 | 342996094.5 | 265437090.8 | 449384185   | 214012375.9 | 730010406   | 197858819   | 491216792.4 | 578952236.8 | 979969470.6 | 355639355.4 | 373594730.8 | 424264278.4 |
| 272413806.8 | 190779651.5 | 89040807.08 | 79212319.28 | 56814892.6  | 71326258.48 | 50686780.78 | 264926172.1 | 40258982.88 | 43979385.37 | 44923568.98 | 288485577.1 | 206664914.4 | 210633576.6 |
| 366552063.9 | 357118675.5 | 337518352.7 | 774739892.5 | 460126310   | 382070162.9 | 995066110.1 | 357514942.9 | 193439326.8 | 153065775.4 | 581699291.8 | 339839280.4 | 539411838.3 | 424202337   |
| 374997998   | 198179026.9 | 200760789.1 | 200495171.2 | 153144917.4 | 238512735.2 | 227332098.5 | 286432436.5 | 148324441.8 | 227899159.4 | 137802975.1 | 357387664.2 | 311579965   | 262924107.3 |
| 485032634.7 | 46407131.88 | 41409616.59 | 72320204.58 | 71471130.55 | 46470089    | 141379935.2 | 69028147.55 | 37470681.62 | 27954717.51 | 71639627.19 | 64459748.2  | 54463286.69 | 62124814.95 |
| 167518034.8 | 145987841   | 182367735.9 | 284817356.6 | 261053871.2 | 97330601.73 | 823854999.3 | 88202862.93 | 101043786.5 | 66060490.1  | 391152021.8 | 233540678.4 | 212291170.8 | 263889809   |
| 380177804   | 296262080.3 | 188837684.7 | 327415735.9 | 412135294.3 | 223457249.3 | 666369296.2 | 248453564.8 | 137689663.4 | 118700124   | 473336337.2 | 298267485   | 270206731.2 | 300644627.6 |
| 64818633.01 | 88728009.41 | 113950915   | 86488934.08 | 117781745.6 | 108542189.6 | 143828425.8 | 40784486.16 | 65485933.84 | 27959691.64 | 44243218.03 | 94787426.24 | 107524404.7 | 113726163.7 |
| 210421669.2 | 75512751.98 | 76961401.53 | 149816729.6 | 204089824.7 | 79472720.32 | 295266830.1 | 85926829.62 | 91071043.65 | 85691449.72 | 390315830.3 | 138630628   | 133008294   | 139042557   |
| 308266149.5 | 43085081.08 | 122931126.5 | 12233614.68 | 29012453.82 | 146658819.4 | 279836245   | 71445660.23 | 27190998.72 | 386902162.3 | 9565635.495 | 65230018.52 | 95138019.89 | 98430609.2  |
| 80383749.71 | 213755078.2 | 84700931.37 | 26279465.42 | 26296701.36 | 48996696.27 | 49790373.15 | 57190729.93 | 121063222.4 | 149986125   | 132352521.9 | 123207593.4 | 108474756.2 | 121763658.7 |

|             |             |             |             |             |             |             |             |             |             |             |             |             |             |
|-------------|-------------|-------------|-------------|-------------|-------------|-------------|-------------|-------------|-------------|-------------|-------------|-------------|-------------|
| 111927999   | 130281746.7 | 219556342.7 | 189310129.4 | 168080639   | 189878149.8 | 236250361.4 | 162919242.9 | 151908213.9 | 207994925.2 | 65666770.6  | 236162817   | 198301625.5 | 187977468.8 |
| 176146675.7 | 53966715.22 | 88554781.7  | 20700960.88 | 39355507.93 | 97358512.24 | 52575063.69 | 47506025.21 | 77735325.44 | 122845858.6 | 25249473.82 | 127225369.8 | 102272648   | 110223817   |
| 179258285.9 | 59503035.37 | 58994522.65 | 127982597.8 | 69360950.36 | 124008612.8 | 395561981.8 | 67038076.66 | 15405979.92 | 20893234.02 | 131183510   | 77160215.56 | 94015584.88 | 114945445.3 |
| 97265147.95 | 76034929.97 | 191138274.4 | 153417282.6 | 100215547.3 | 165987281.3 | 173577890.9 | 155048073.5 | 119176170.7 | 226235380.5 | 90317575.99 | 201189938.9 | 108538838.6 | 143943935.6 |
| 34866511.34 | 87684670.97 | 43183746.63 | 35985846.8  | 86906275.96 | 82541295.98 | 51289920    | 94045124.5  | 72297626.07 | 42034684.85 | 20282999.51 | 123997802.3 | 87700839    | 69738290.45 |
| 28018050.09 | 199069415.8 | 114203555.8 | 63853122.63 | 157319809.2 | 54402090.48 | 55320862.61 | 67586614.43 | 137378151.9 | 73693118.97 | 47040601.67 | 79355368.9  | 73459633.91 | 90433898.19 |
| 80865842.66 | 16950488.27 | 35236710.81 | 64452825.9  | 33359996.45 | 26950438.71 | 310036330.4 | 17333144.56 | 5860455.701 | 12128183.71 | 200426027.7 | 50690699.98 | 49498175.74 | 58278104.92 |
| 5261624.724 | 8301244.847 | 9782115.088 | 4914176.606 | 11368594.17 | 159028566.2 | 55501026.5  | 63239139.78 | 34322702.93 | 119056573.5 | 166194469.2 | 35456756.03 | 35285024.69 | 33427022.26 |
| 32758660.37 | 63211464.03 | 46016113.01 | 30050046.37 | 60126927.06 | 84013251.73 | 48038118.61 | 70219853.51 | 122777572.9 | 85039021.36 | 38238334.34 | 107816838.8 | 63973048.91 | 74865029.9  |
| 111241789.7 | 81601467.84 | 3408482.504 | 20441516.95 | 32984168.3  | 121523589.1 | 33260321.78 | 107401887.9 | 29597369.1  | 58510940.09 | 25764559.94 | 73753245.08 | 100388885.5 | 98151397.31 |
| 11698942.28 | 42844173.22 | 63217851.4  | 11024006.37 | 19409531.34 | 31767096.09 | 39314415.5  | 39404192.36 | 41108434.99 | 21619345.81 | 10352076.49 | 34705339.5  | 42391138.21 | 49425704.51 |
| 12249047.28 | 10555457.84 | 13055590.63 | 10916726    | 13738262.41 | 114489213.1 | 101280630.3 | 165014386.6 | 168759398.7 | 178185536.8 | 74430784.7  | 33836296.49 | 42777633.96 | 51858016.12 |
| 48574218.39 | 56728248.6  | 61217931.64 | 55459854.72 | 102974608   | 54242754.02 | 101486272.2 | 56633826.19 | 72939305.04 | 68750235.34 | 58782453.45 | 88201084.74 | 66835286.8  | 72692053.06 |
| 16019572.81 | 49799559.02 | 37101671.57 | 12359032.02 | 20711770.94 | 46548920.7  | 22348922.98 | 33025235.65 | 49636493    | 57183778.88 | 31483331.17 | 76788863.82 | 44869071.58 | 44880128.01 |
| 74699636.38 | 30377116.87 | 37051680.58 | 52359744.98 | 32595351.09 | 46506412.98 | 60413498.09 | 36440497.76 | 37732541.43 | 49112003.27 | 48506230.89 | 39513523.26 | 41811326.71 | 46671576.86 |
| 20267234.54 | 36760159.47 | 36526213.31 | 17904892.31 | 38094523.64 | 33258664.38 | 21048853.18 | 34062441.16 | 49473723.4  | 43208840.25 | 19923045.39 | 54828771.77 | 42863874.68 | 33820010.33 |
| 9284559.026 | 7684699.046 | 7087099.629 | 8485399.312 | 7245910.806 | 23529488.77 | 26525775.95 | 31990378.43 | 27898040.88 | 96679843.65 | 31751301.27 | 10623454.26 | 13787870.65 | 20965274.34 |
| 11521681.94 | 18901923.87 | 12656239.67 | 8410186.84  | 3862646.377 | 12530527    | 10809768.06 | 15724246.95 | 15074643.6  | 17910704.63 | 5212492.248 | 16736716.83 | 15945389.24 | 16685276.58 |
| 1190057.248 | 7013258.652 | 73285396.68 | 2996164.916 | 35786625.04 | 9670376.264 | 27951737.48 | 2677871.083 | 9069375.587 | 10792927.54 | 1957137.429 | 8557202.574 | 10695306.19 | 9593229.694 |
| 35368303.59 | 24818104.53 | 8552482.024 | 12810108.21 | 51600229.88 | 12426325.99 | 5704007.661 | 28956624.96 | 8279372.761 | 23962489.35 | 18905931.89 | 23427896.57 | 19654433.18 | 25709361.54 |
| 30093382.67 | 1828644.461 | 6314168.214 | 40856768.75 | 6935886.201 | 7290444.491 | 9546903.551 | 1891516.296 | 1716422.432 | 379175.6422 | 20595250.78 | 16658001.79 | 10127099.42 | 8988413.493 |
| 12475350.81 | 17430356.33 | 15459445.41 | 17966512.59 | 41671418.16 | 21554775.09 | 30003490.05 | 15028389.54 | 11568337.72 | 14804704.6  | 4219776.766 | 23270481.45 | 15448852.42 | 15735501.18 |
| 4018720.945 | 9366669.741 | 4192015.38  | 3038110.976 | 7590791.417 | 8920538.983 | 2816941.872 | 21859028.36 | 25732696.79 | 33873321.2  | 4158516.452 | 9744975.133 | 11962875.34 | 13028780.3  |
| 10134643116 | 3708365533  | 5351182274  | 12395666349 | 8213871561  | 5758446742  | 18011463344 | 4817015275  | 2477489216  | 2353218348  | 265778019.3 | 5965208133  | 6416739422  | 7460545069  |
| 3784968543  | 4439781509  | 4229981181  | 1809198792  | 2071165542  | 2844214810  | 3915643105  | 5506150912  | 4661826560  | 2477078954  | 2774785627  | 8394376638  | 5174492077  | 4480690148  |
| 6351669189  | 2685166661  | 3420134278  | 7681462029  | 5229278439  | 3165453248  | 10234648135 | 3264894034  | 1910887363  | 1575394969  | 6768033347  | 6113673818  | 4335998967  | 4298544034  |
| 5282346646  | 702331452.5 | 644281991   | 1823990624  | 535122910.1 | 1584467833  | 600220731   | 730185923.7 | 746679996.3 | 964308232.1 | 4732486590  | 1613883878  | 1659623726  | 1894103625  |
| 3330293532  | 2061748189  | 1716874083  | 5075394072  | 1948497640  | 1896285813  | 5497338203  | 1625958232  | 1119321911  | 986249087.1 | 4435739135  | 3100502589  | 2562644490  | 2574381998  |
| 2428990668  | 1522021388  | 1101895207  | 733272288.3 | 461824219.6 | 1763043589  | 751086131.2 | 1681198181  | 868137322.5 | 2394997824  | 2088021484  | 2218223055  | 1655716850  | 1691330868  |
| 344937005.2 | 679321054.5 | 279108641.6 | 317761080.4 | 1045217975  | 1172015941  | 526292143.8 | 1134489217  | 440191228.8 | 194682412.2 | 176115193.6 | 1361479667  | 813200197.1 | 737844452.6 |
| 72434739.2  | 1971641937  | 1979013893  | 1268917748  | 2145230734  | 1619423774  | 1526005098  | 1082952081  | 1421510679  | 1823484889  | 945782008.4 | 1213747115  | 1173083704  | 1115785608  |
| 639566483.8 | 826720906.9 | 723725571.6 | 319708610.5 | 101871980.2 | 510994946.3 | 677412408   | 451493412.6 | 772623116.7 | 354995616.6 | 486310549.7 | 1300800495  | 844241255   | 770649162.6 |
| 1538710852  | 278336174   | 250785333.6 | 759582173.2 | 247666726.1 | 463728337.5 | 202450087.9 | 283389836.2 | 272258713.7 | 323433268.6 | 1302721370  | 497295978.1 | 550170373.3 | 586965247.5 |
| 148839666.6 | 1666009318  | 978468866.2 | 1033033882  | 1789604903  | 910290162.3 | 848093206.9 | 508912570.3 | 1057808082  | 1006727486  | 534206687.3 | 696019102.1 | 734343764.3 | 758038739.8 |
| 352873515.4 | 425451609.3 | 304094486.6 | 124900996.8 | 116548672   | 247581076.6 | 170869455   | 185268285.6 | 297086393.8 | 606608391.2 | 548463493.7 | 538155551.5 | 390409329.3 | 401678314.7 |



|             |             |             |             |             |             |             |             |             |             |             |             |             |             |
|-------------|-------------|-------------|-------------|-------------|-------------|-------------|-------------|-------------|-------------|-------------|-------------|-------------|-------------|
| 131798578.2 | 282498140   | 198437801.4 | 146916660.8 | 186744008.2 | 321685765.8 | 152792729.6 | 140082482.1 | 912942307.7 | 611419906.8 | 1052385306  | 384720917.5 | 415774523.6 | 352275978.4 |
| 110848730.5 | 294336650.1 | 308794453.9 | 94667682.57 | 105629003.5 | 91013585.98 | 168239676   | 66411858.6  | 249839447.8 | 204742556.6 | 202641014.4 | 251920834.7 | 187263110.4 | 168088490.3 |
| 160348569.1 | 246474316.7 | 338867214.7 | 190104766.3 | 406755333.7 | 570769492   | 557420227.3 | 738893958.6 | 883040569.1 | 673366115.7 | 284180985   | 435321223.7 | 483108175.3 | 512374807.9 |
| 107929870.8 | 10382137.86 | 15131836.83 | 51033961.62 | 12845743.75 | 21734054.59 | 87518439.75 | 8248229.918 | 6130249.168 | 4783781.678 | 60447133.13 | 82979227.92 | 106016171.1 | 125466016.4 |
| 380065764.3 | 124421240.2 | 139991870.6 | 370600768.1 | 345712304.6 | 191575004.3 | 1957560.88  | 141623374   | 861664701.4 | 162170353.5 | 306428440.9 | 213930582.4 | 265037064.2 | 215416830.2 |
| 188744106.5 | 112685108.1 | 159117526.7 | 276153948.2 | 636021367.9 | 279624699.4 | 258137064.4 | 177692271.2 | 176756884   | 122704617.1 | 145377481.6 | 322610469.5 | 226746320   | 268598652.5 |
| 298701546.3 | 480319086.9 | 223194461   | 495045895.6 | 529311334.5 | 588068486.6 | 452401584   | 343376810.2 | 541536381.7 | 567162487.1 | 385736865.2 | 258226790.5 | 422441389.3 | 270424600.3 |
| 229471550.9 | 434905783.4 | 396063897.9 | 481564736.1 | 375757650.9 | 514181721.3 | 260043773.3 | 511293274.8 | 430720995.7 | 449315738.4 | 367082147.6 | 230840552.2 | 378428831.9 | 406903412.6 |
| 385839915.3 | 117195032.2 | 167033066.3 | 165725916.7 | 64021225.17 | 196357122.8 | 351641633.1 | 85053123.19 | 70074137.11 | 50561024.04 | 340593650.1 | 171660595.2 | 224719352.6 | 217926380.5 |
| 373639848.5 | 184617544.8 | 264507246.6 | 207427652.7 | 267993954.4 | 286499227.3 | 194128502.7 | 451131449.6 | 254793951   | 416872748.6 | 239646037.4 | 215436329.1 | 260885650.6 | 312437362.5 |
| 100008075.8 | 104698610.4 | 91433898.59 | 84747227.88 | 124634431.7 | 260114676.3 | 138525670   | 239301770.9 | 90428815.82 | 70966177.06 | 49960516.74 | 153425039.8 | 177101801.8 | 196547751.4 |
| 325347266.4 | 12203241.7  | 92752202.3  | 443264.6509 | 35739129.92 | 201372624.7 | 188423565.8 | 123118102.2 | 7852643.235 | 61954284.28 | 46001419.87 | 132915788.7 | 118191065.5 | 126547344.3 |
| 224342133.1 | 113196529.2 | 144176654.4 | 74907223.97 | 165237877.9 | 340896201.6 | 161592713.9 | 277017157.4 | 94094819.69 | 295239478.1 | 123436988.3 | 107114810.9 | 105345575.4 | 184746162   |
| 74801631.82 | 217275159   | 218177081.3 | 96489469.83 | 179315437.7 | 142594335.4 | 130881939   | 206968108.5 | 326246017   | 283661462   | 124343074.7 | 215791201.9 | 187537859.1 | 175826345.3 |
| 44538618.6  | 125050611.4 | 203225350   | 21570231.36 | 59261791.67 | 212098954.7 | 126969091   | 240076683   | 262651837.1 | 291867773   | 99278513.66 | 139315816.9 | 168276910.3 | 201096494.9 |
| 14315877.67 | 129393466   | 128339061.1 | 21965043.68 | 13485425.79 | 12370270.72 | 34099387.49 | 8050895.217 | 273139792.3 | 45830557.74 | 148103846.6 | 97109322.85 | 70173952.05 | 66145005.45 |
| 81569938.92 | 232295686.6 | 144251074.1 | 79002887.28 | 119839691.9 | 76079268.46 | 189888327.3 | 55779037.53 | 265429621.6 | 267949428.9 | 318633902.8 | 116537193.3 | 134866756.8 | 148946216.8 |
| 125420519.7 | 272195399.9 | 225486104.4 | 242599884.3 | 225237259.3 | 296893186.6 | 141811284.3 | 318667482.2 | 241419083   | 262129326.4 | 207314384.6 | 142508948.7 | 208860854.6 | 231870768.4 |
| 38153546.29 | 80844195.21 | 98371815.09 | 40093690.11 | 91229332.74 | 48374926.48 | 76613750.72 | 50759876.31 | 142125189.8 | 103255421   | 61170416.83 | 97275377.35 | 84910131.66 | 92930068.31 |
| 162013991.9 | 22004054.89 | 12531634.35 | 277025419.4 | 24738128.12 | 79580141.42 | 6694783.882 | 29131065.83 | 15261893.47 | 40287742.7  | 153580849.2 | 71209566.94 | 72093314.5  | 62425078.19 |
| 55937005.52 | 39738238.31 | 97300969.25 | 10529581.8  | 199995266.4 | 236322380.9 | 432602218.6 | 166514998   | 23552235.13 | 79911454.49 | 55906572.67 | 70499950.04 | 101637423.4 | 76798448.28 |
| 14985575.34 | 28323340.33 | 67468392.82 | 25967708.8  | 36593820.54 | 122124622.7 | 32030935.43 | 18349851.06 | 105051470.4 | 211445814.3 | 24948579.01 | 89894957.07 | 84998340.13 | 95814043.42 |
| 143231881.9 | 128425866.3 | 172305542   | 206734924.2 | 81930761.72 | 234642532   | 69204511.76 | 77172223.21 | 110426495.7 | 411643722.9 | 198424314.2 | 124500427.5 | 100273645.7 | 124683019.8 |
| 133831744.7 | 93204408.09 | 128813059.1 | 100569331.1 | 204756407.1 | 272506463.2 | 239877414.6 | 220476049.2 | 235139346.8 | 314430252.3 | 167615179   | 142404686.7 | 151462438.7 | 166995658.9 |
| 52326635.62 | 116512446.1 | 44470009.82 | 9496122.226 | 22293635.79 | 43337342.12 | 61881730.49 | 43872390.58 | 19423975.96 | 45238334.25 | 27614133.15 | 165606080.4 | 100016904.3 | 104499487.3 |
| 103241660   | 238888903.5 | 173749729.6 | 219023215.2 | 198356822.8 | 229632677.9 | 111908847.1 | 245591599.3 | 200855016   | 214586205.2 | 177075675.5 | 124136092.6 | 162788550.6 | 192787712.9 |
| 55981377.46 | 177838434.3 | 170820683.5 | 73645830.46 | 149833627.5 | 104342290.5 | 134773566.6 | 147799969.2 | 219151844.4 | 166863216.6 | 74335631.74 | 147650974.9 | 131615966.6 | 125783508   |
| 74878181.47 | 25246453.15 | 11702035.08 | 26485430.96 | 15570497.44 | 13905575.62 | 8824358.673 | 19602637.95 | 21096532.6  | 15536553.25 | 37319758.93 | 61305832.9  | 72217507.44 | 64309636.03 |
| 69671184.54 | 179320629.7 | 125616885.6 | 70414124.16 | 216220334.4 | 86217041.32 | 100787708.4 | 147617297.5 | 51106518.43 | 192587989.7 | 60087097.66 | 119988940.7 | 145866441   | 130327593.5 |
| 55416903.5  | 11483245.4  | 14186679.53 | 15013768.17 | 32986104.5  | 107802006.2 | 8222092.407 | 56165316.37 | 16197624.76 | 7377688.117 | 31904629.48 | 50945721.05 | 83698815.25 | 58798912.08 |
| 63682143.21 | 145959568.6 | 152130919.6 | 59112655.37 | 98433333.06 | 58196715.06 | 103869219.1 | 88020380.13 | 198678018.4 | 158548572.7 | 81806142.42 | 141539010   | 105433381.4 | 97021538.85 |
| 80951353.38 | 200697062.6 | 140617967.9 | 177533354.9 | 144617903.2 | 176845574.7 | 78219451.93 | 185592505   | 143233593.1 | 172395896.7 | 142026174.2 | 117656473.6 | 136001054.7 | 130823455   |
| 122235703.1 | 23864985.47 | 56178879.11 | 55166242.44 | 19741970.86 | 58260165.26 | 64265273.36 | 41189911.59 | 13828695.41 | 36413142.21 | 24035539.59 | 71793747.5  | 50769022.39 | 48470765.74 |
| 20902552.95 | 72364437.26 | 406084.8677 | 7699013.203 | 13922750.79 | 155864081.6 | 59300656.12 | 170321305.6 | 191550110.6 | 172920761.2 | 57951200.42 | 111443450.7 | 113879837.3 | 128436670.1 |
| 49913474.92 | 97387100.39 | 116898495.5 | 54273230.29 | 106247979.4 | 66720756.46 | 112892673.9 | 84911442.66 | 248202451.1 | 130656457.4 | 50152977.74 | 121694434.6 | 96216178.6  | 94223938.97 |

|             |             |             |             |             |             |             |             |             |             |             |             |             |             |
|-------------|-------------|-------------|-------------|-------------|-------------|-------------|-------------|-------------|-------------|-------------|-------------|-------------|-------------|
| 112792579.6 | 57689812.64 | 71554254.03 | 68352105.69 | 77245599.77 | 126074697.5 | 104182742.5 | 148827205.3 | 59827648.32 | 83742799.36 | 50137929.43 | 162853059.7 | 97800152.21 | 87694074.28 |
| 130768033.1 | 70330923.34 | 86290702.52 | 95204004.12 | 102964178.3 | 78790672.35 | 302033001.4 | 71900827.3  | 45665353.46 | 45371271.52 | 192023145.9 | 65937722.02 | 103582501.8 | 107604165.2 |
| 69579132.46 | 37653680.9  | 145186669.9 | 126554824.1 | 111712162.9 | 75137661.76 | 97766021.86 | 59571995.43 | 154545049   | 134309079.5 | 203304210.3 | 124671223   | 97487257.36 | 66551136.55 |
| 84165404.83 | 150448657.2 | 155028295   | 114937884.8 | 223663872   | 122145391.7 | 128277291.4 | 147326917.7 | 211045016.9 | 2226650.355 | 1916524.414 | 126321558.9 | 124519410.3 | 134828687.2 |
| 2123576.136 | 1994868.142 | 1912333.553 | 1827735.948 | 3448277.799 | 3885774.164 | 2726919.953 | 7404170.888 | 4171703.887 | 2208553.077 | 1979005.88  | 15588509.58 | 17320030.36 | 19583657.37 |
| 92808950.19 | 122195738.7 | 131305009.8 | 78123374.52 | 104855977.6 | 95799896.84 | 92363437.74 | 95807744.77 | 225661702.2 | 160509237.3 | 75075876.74 | 118962187.2 | 115541533.3 | 101121070.1 |
| 147794041   | 16781513.3  | 52659408.97 | 85639584.26 | 34344512.62 | 62175844.19 | 166344193.3 | 17246074.62 | 6280503.59  | 4606701.156 | 159101530.6 | 49727199.02 | 53445591.84 | 64097223.11 |
| 109613776.8 | 75503947.5  | 119672336.9 | 141801940   | 117408963.6 | 107699592.8 | 238742428.2 | 108061144.3 | 90976015.77 | 76551954.24 | 182420325   | 89151195.45 | 126930587.1 | 143337700.9 |
| 4474535.315 | 26024805.71 | 40775180.88 | 5714965.554 | 11619367.93 | 67748070.45 | 25954865.8  | 8862527.268 | 10777010.92 | 6154169.246 | 5774921.315 | 50639451.8  | 44256290.64 | 43435142.47 |
| 58103014.29 | 39611153.88 | 225515961.6 | 51530411.9  | 166737681.2 | 253269338.3 | 246942409.4 | 25120241.59 | 4968101.261 | 73437521.77 | 9311599.384 | 58737433.84 | 74400065.01 | 86949029.82 |
| 116765518.7 | 42063193.37 | 152042285.7 | 105834129.5 | 69927611.65 | 181864621.8 | 119660998.6 | 72810882.5  | 94620585.58 | 98780909.35 | 89496704.02 | 133584190.8 | 112994055.8 | 149953123.4 |
| 132034096.4 | 47323409.58 | 68674818.84 | 45823947.67 | 22018014.99 | 86129269.25 | 96949325.95 | 24028750.29 | 17421529.32 | 14991209.35 | 86494894.81 | 52219309.89 | 51290750.35 | 59866173.43 |
| 21746713.48 | 20908353.75 | 28238928.05 | 19144482.55 | 32409094.83 | 11424659.51 | 34714051.59 | 19954282.7  | 20735761.43 | 18384986.44 | 18327184.2  | 33227168.49 | 30026716.2  | 26912102.77 |
| 5687348.202 | 9966534.058 | 78403198.78 | 70397452.34 | 174656395.4 | 28425155.19 | 44525403.85 | 54639846.57 | 33805281.46 | 31995426.25 | 12459527.69 | 25398592.13 | 34623402.62 | 40983972.15 |
| 10998747.92 | 28698468.08 | 72355887.78 | 20856366.52 | 42105819.04 | 24698547.36 | 67107437.49 | 21745614.66 | 88668229.42 | 43816665.99 | 20173586.16 | 69092247.93 | 43903376.75 | 39638570.69 |
| 122712071.4 | 48967692.21 | 74710991.32 | 48013626.55 | 14754659.45 | 76456820.04 | 78762892.84 | 19257136.16 | 17874102.72 | 14964404.12 | 74817046.79 | 48941019.99 | 59302645.04 | 64117150.57 |
| 69143243.5  | 135331362.1 | 128212691.9 | 99901573.45 | 140821358.6 | 101553745.3 | 65431035.6  | 104024218.7 | 54553246.48 | 76411484.27 | 48349545.34 | 100533039.6 | 108592163.6 | 107842408.9 |
| 84455206.09 | 26445065.96 | 59071400.17 | 86874663.43 | 67721092.04 | 74064328.72 | 81229399.4  | 33980792.07 | 35321625    | 35231337.65 | 48474768.69 | 59009871.51 | 49148842.14 | 70251633.2  |
| 94576668.58 | 27124611.06 | 95501069.29 | 61306680.09 | 116909348.3 | 157490775.9 | 165315644   | 106991996.4 | 21552120.44 | 118099734.7 | 75249608.9  | 118072253.6 | 67565597.83 | 65065583.43 |
| 58927866.87 | 129682132.2 | 93927503.28 | 64034363.68 | 126698807.7 | 91435436.09 | 117209723.1 | 124226016.5 | 74556081.11 | 146718933.6 | 44070697.94 | 93929260.59 | 112001337.8 | 122466249.6 |
| 63272885.03 | 16567031.04 | 19141346.59 | 21814201.88 | 13957185.88 | 63517853.74 | 19438144.11 | 122109852   | 30042703.28 | 16913497.27 | 8684970.903 | 94250617.2  | 68968878.69 | 46611570.12 |
| 91813355.48 | 25002242.59 | 25893361.95 | 118511425.5 | 110005496.1 | 80306399.78 | 89245660.58 | 27256418.17 | 24823868.65 | 156144761.5 | 15184869.79 | 114962968.7 | 116959414.7 | 111323013.2 |
| 47755770.9  | 70749993.94 | 53866556.19 | 38156511.1  | 64463795.17 | 74638746.34 | 47074147.21 | 15747222.55 | 72486225.67 | 113476031.3 | 51316180.83 | 53918178.12 | 72374889.34 | 98273592.13 |
| 111707001.3 | 34479622.63 | 79204025.31 | 128862039.8 | 65572428.6  | 55405024.99 | 183219083.3 | 36244901.45 | 41085059.73 | 46556061.06 | 118196185.3 | 71385807.13 | 61935916.13 | 60684505.12 |
| 110193076.4 | 16233929.58 | 29023670.34 | 26648314.78 | 16956262.63 | 43244103.53 | 141209574.6 | 22344515.41 | 8446470.947 | 8624539.904 | 44221691.48 | 27006024.53 | 41805946.16 | 41828499.95 |
| 109710967.5 | 45538364.16 | 48019650.47 | 57210279.39 | 43099286.09 | 40365999.56 | 136638210.8 | 31306707.04 | 33573658.59 | 29476220.21 | 102966928.8 | 42907278.04 | 48443160.28 | 46642978.77 |
| 20419020.98 | 44203607.57 | 38196970.31 | 21020753.38 | 19484216.45 | 22268492.06 | 30349463.68 | 13201972.26 | 41731425.71 | 80957356.13 | 26311739.06 | 61601997.77 | 35034596.87 | 46928753.69 |
| 446491.7267 | 640881.8578 | 2754571.723 | 190682.1153 | 1635295.484 | 5003138.472 | 483901.0379 | 43661607.95 | 1044304.503 | 616988.0487 | 225061.1513 | 982614.6621 | 839909.4596 | 538162.8345 |
| 11115305.94 | 93051176.65 | 78726928.63 | 30990684.12 | 13801536.13 | 94335971.45 | 54659889.42 | 112505547   | 198784498.7 | 191260669.2 | 50031827.63 | 59980967.2  | 80789975.75 | 91379148.55 |
| 20504782.18 | 63380293.67 | 47613934.87 | 21127748.95 | 40552573.98 | 33984425.75 | 25412311.33 | 24976288.87 | 102358618.8 | 62251626.19 | 82990989.77 | 55177382.54 | 52579231.48 | 57729126.73 |
| 10066986.96 | 29292987.59 | 20069113.49 | 30970520.9  | 135750766.1 | 16916082.97 | 9295625.165 | 93683657.78 | 9828160.446 | 6078607.992 | 5725579.522 | 35328734.66 | 37120170.22 | 39046371.15 |
| 102969123.2 | 16285901.96 | 38258871.7  | 50482813.04 | 61555389.4  | 24525066.46 | 94972358.67 | 11721037.57 | 12869750.35 | 12232852.21 | 77484647.07 | 36144527.36 | 27242451.47 | 28118835.42 |
| 40586879.92 | 60064523.1  | 44883495.03 | 38722160.89 | 100977068.9 | 56335126.53 | 45564253.87 | 48354053.89 | 47967584.48 | 42448256.02 | 57925816.25 | 66894320.37 | 52406188.94 | 54012518.43 |
| 100134714.5 | 48551991.51 | 57468614.81 | 17267125.6  | 56846403.65 | 105286069.2 | 85800709.1  | 61730117.56 | 17320262.42 | 39530814.26 | 19126552.27 | 43217246.67 | 43463380.73 | 55841962.21 |
| 60331435.56 | 17834654.62 | 56251880.43 | 75787260.13 | 44784601.01 | 33026173.02 | 157961899.2 | 8877735.503 | 8932824.774 | 4686924.69  | 125740367.4 | 32067150.84 | 36217323.9  | 41225320.46 |

|             |             |             |             |             |             |             |             |             |             |             |             |             |             |
|-------------|-------------|-------------|-------------|-------------|-------------|-------------|-------------|-------------|-------------|-------------|-------------|-------------|-------------|
| 64761697.36 | 73284923.92 | 98934975.83 | 115282978   | 71756545.34 | 64677203.01 | 34383884.94 | 81152044.45 | 104263204.1 | 108157907.3 | 22608787.58 | 60597427.6  | 54936468.88 | 83685172.33 |
| 9369015.774 | 50972605.82 | 26796955.27 | 5192758.599 | 24418367.21 | 9800194.827 | 22849256.58 | 9366414.001 | 70109600.75 | 61585189.28 | 44813547.57 | 24192840.33 | 26258723.64 | 26731316.23 |
| 1842317.907 | 39139094.89 | 19429760.99 | 1181835.222 | 2056443.92  | 2881066.553 | 1392636.775 | 3167022.121 | 2867378.699 | 2571018.053 | 1109683.567 | 24558623.4  | 22607570.59 | 24082075.75 |
| 19268366.51 | 90873247.11 | 45744819.43 | 17289469.35 | 32874338.18 | 22914532.31 | 21367793.86 | 25396764.81 | 64821117.33 | 71758856.05 | 58185977.79 | 65732526.79 | 50303171.43 | 43271825.9  |
| 27099894.72 | 103366888.1 | 83983680.55 | 40226754.78 | 94277762.74 | 50341782.23 | 72602559.29 | 71558150.19 | 112828244.7 | 113528246.4 | 40614567.82 | 64718458.37 | 74650685.4  | 77461047.09 |
| 92053629.12 | 89279607.91 | 87948285.16 | 93389261.64 | 83985186.79 | 72788882.61 | 67674914.7  | 73569157.83 | 109976058.6 | 92423364.78 | 71551405.07 | 65281081.34 | 69099323.6  | 83505710.9  |
| 32090753.96 | 22229003.71 | 27686440.91 | 13984660.99 | 19961896.96 | 46986996.98 | 25555650.32 | 45411902.58 | 33239506.37 | 25816628.61 | 13065741.61 | 39135859.43 | 37322988.31 | 35055510.99 |
| 56285765.4  | 93524116.66 | 64820190.38 | 31650225.47 | 35094214.55 | 88783407.73 | 27358456.61 | 76582815.71 | 73832138.69 | 63496282.81 | 64810916.75 | 72582136.32 | 65843445.61 | 66582085.13 |
| 11946694.89 | 18459101.2  | 13088463.36 | 10550518.85 | 22304851.73 | 18611547.93 | 16096069.99 | 13009580.57 | 17488744.64 | 25594003.17 | 11861675.39 | 36682203.08 | 30087298.77 | 28151489.56 |
| 61746779.52 | 19533669.78 | 32778400.83 | 81098022.75 | 27020639.68 | 32259620.55 | 39853970.38 | 22682232.03 | 11734974.93 | 12430269.79 | 115054118.4 | 50725262.04 | 35246188.54 | 35973116.8  |
| 44341327.67 | 32478374.7  | 54880098.59 | 5700735.465 | 21529092.48 | 154865360.1 | 86244256.39 | 71598042.85 | 45356678.33 | 162029919.6 | 16400749.98 | 80924924.89 | 73719174.84 | 70231218.2  |
| 21464718.9  | 55535993.15 | 52011384.8  | 23188900.54 | 47278558.2  | 42425403.92 | 49746415.49 | 43535386.01 | 81025845.93 | 68716238.53 | 28248631.67 | 63931397.4  | 60101351.4  | 62569710.94 |
| 12531989.86 | 21721012.56 | 27999524.73 | 14212041.39 | 25320302.61 | 33456200.97 | 25109010.22 | 34604046.55 | 35289700.5  | 24574739.44 | 13610332.44 | 43004936.88 | 36148957.1  | 33767757.61 |
| 89618012.24 | 33929439.42 | 71412594.03 | 50911253.17 | 46380935.29 | 37348266.72 | 142321578.5 | 19323734.85 | 21194280.89 | 16534874.71 | 105131720.8 | 57350677.52 | 44643505.19 | 50805388.04 |
| 88794987.9  | 3360652.285 | 7002235.375 | 2711360.008 | 1084746.802 | 3642919.291 | 6942190.564 | 3763333.823 | 3734233.791 | 2915255.608 | 3825095.728 | 11657219.01 | 9423517.724 | 11205320.27 |
| 36750402.69 | 12587709.38 | 23130250.7  | 20987816.8  | 23445748.04 | 28674275.71 | 55779778.57 | 21476889.68 | 13784047.59 | 17899175.68 | 31079694.42 | 34586950.04 | 48162213.12 | 55175301.5  |
| 88410284.67 | 2839450.248 | 6097549.755 | 1587662.735 | 254575.6795 | 3048166.701 | 6510395.789 | 3125887.659 | 2699097.846 | 1897874.883 | 2985086.935 | 10843924.53 | 9014512.325 | 10579093.65 |
| 27171339.03 | 39426055.24 | 34479775.01 | 25833264.2  | 58985192.03 | 34052409.33 | 42467032.24 | 32992888.43 | 45571980.57 | 61961608.99 | 25957589.13 | 53778273.57 | 38386985.75 | 38564718.24 |
| 26247397.66 | 73046588.37 | 59607866.9  | 59291362.52 | 107917213.5 | 84460745.91 | 56166484    | 110159941.5 | 97012223.53 | 79137704.54 | 35453386.47 | 76391370.25 | 65253199.72 | 57994374.9  |
| 32974467.01 | 64711284.19 | 92832993.86 | 33683736.31 | 45344958.41 | 109297623.4 | 67204566.8  | 89785783.58 | 131686499.9 | 117089804.8 | 67167789.52 | 63367753.91 | 76523779.59 | 92462150.84 |
| 83497222.11 | 23950862.28 | 29790947.83 | 41508863.9  | 20826021.05 | 50976846.23 | 29451150.45 | 20264762.82 | 11706645.74 | 8921982.42  | 55843106.74 | 44247129.77 | 38937297.5  | 41185874.86 |
| 29855797.9  | 92156605.44 | 59306048.59 | 86021535.51 | 68170868.46 | 89602049.32 | 40569921.21 | 86829441.22 | 64427099.2  | 30311922.39 | 63603890.17 | 54199984.43 | 62573748.31 | 64049476.14 |
| 5734325.669 | 36266481.48 | 18517263.73 | 6876698.721 | 9242158.008 | 2950506.308 | 6722815.99  | 2345998.407 | 45689805.47 | 5315920.824 | 53157078.99 | 26100143.19 | 16533336.32 | 14298463.71 |
| 11074712.16 | 13519407.33 | 22050751.61 | 20387200.16 | 9484891.204 | 30440722.25 | 29408403.47 | 29689978.01 | 35523635.52 | 48205367.84 | 13101190.21 | 30976937.17 | 34520309.57 | 34458819.08 |
| 48926756.69 | 73126281.74 | 49791699.74 | 80984242.96 | 113352525.8 | 60055651.44 | 38538790.45 | 77091943.3  | 129402858.7 | 67639018.81 | 52789182.57 | 64340338.23 | 71442311.8  | 77895456.72 |
| 80337576.43 | 22250902.38 | 29886127.38 | 22162206.52 | 18180957.19 | 7317286.343 | 45760951.15 | 34669823.3  | 18233954.66 | 25437811.39 | 25352788.18 | 28602590.69 | 37951375.63 | 32826554.42 |
| 55986418.26 | 17576468.24 | 37725935.86 | 58096546.72 | 67079518.25 | 36050866.8  | 146391782.9 | 16968086.25 | 20657519.81 | 21616926.68 | 66363581.96 | 38571526.01 | 48430177.25 | 55002641.8  |
| 13650439.79 | 33809905.73 | 45020348.67 | 13875118.45 | 23685992.97 | 39023105.6  | 44855414.28 | 3037826.268 | 65163057.73 | 50183372.77 | 27829888.28 | 46415927.18 | 44676466.35 | 45135629.41 |
| 33118299.46 | 29372460.27 | 26130260.62 | 13253281.99 | 44157645.48 | 37473163.37 | 25591976.27 | 31711476.54 | 35435279.67 | 72420690.25 | 16118524.82 | 47279175.28 | 33238335.31 | 40442761.81 |
| 23030727.51 | 67984020.2  | 57179123.5  | 27881601.83 | 76777649.7  | 56591551.87 | 48545242.78 | 62969812.27 | 93805858    | 88855835.3  | 33139790.79 | 59288140.48 | 74052231.16 | 75162764.66 |
| 6208920.259 | 46500243.13 | 49226469.87 | 8681419.988 | 7776037.911 | 9228259.989 | 10834067.75 | 4835095.78  | 35183652.93 | 60749527.18 | 48732459.57 | 25390194.26 | 20960512.26 | 21892560.57 |
| 74351265.46 | 16453030.1  | 29208131.21 | 50054628.35 | 43347768.1  | 20571758.52 | 67797927.6  | 18277487.4  | 11142658.56 | 6109947.947 | 57495917.13 | 30861140.27 | 32270601.79 | 33253371.4  |
| 26405583.35 | 44792117.73 | 128652675.2 | 46326971.45 | 12906447.8  | 61272524.88 | 75569600.9  | 28983264.2  | 93958920.83 | 107775763.5 | 53908858.1  | 68518669.46 | 56085364.71 | 59398384.23 |
| 26816388.42 | 54039402.98 | 50928239.79 | 25794096.98 | 59645874.87 | 46767891.06 | 44790076.58 | 46948672.2  | 67358510.26 | 73226642.51 | 25668206.44 | 50044443.25 | 47145257.57 | 57367374.27 |
| 33467755.92 | 74242385.81 | 56611679.68 | 64128627.72 | 54648119.35 | 72606436.79 | 32154187.09 | 75202512.88 | 57536284.65 | 66894900.52 | 50545299.91 | 47164763.11 | 50078172.15 | 55461268.12 |

|             |             |             |             |             |             |             |             |             |             |             |             |             |             |
|-------------|-------------|-------------|-------------|-------------|-------------|-------------|-------------|-------------|-------------|-------------|-------------|-------------|-------------|
| 22809468.64 | 44001760.02 | 44445800.66 | 19508841.95 | 29498045.74 | 24929966.3  | 28102964.32 | 36215958.75 | 54335671.16 | 48525308.05 | 25765370.64 | 44736554.63 | 35398055.1  | 32108973    |
| 32387584.97 | 50537712.05 | 72627211.31 | 31793135.05 | 61797008.48 | 93623275.54 | 69887072.47 | 14392814.03 | 31817732.25 | 98036635.23 | 36499656.51 | 40644523.57 | 47468188.6  | 61630928.76 |
| 19578455.96 | 41822485.4  | 22712493.23 | 43510512.58 | 90270120.22 | 14048760.27 | 33142864.74 | 10603763.56 | 11666831.03 | 10349221.35 | 11897598.22 | 45155032.61 | 34219259.97 | 42465453.28 |
| 10478703.59 | 16952591.12 | 26356330.81 | 34412065.93 | 38537760.43 | 1957474.029 | 114017628   | 11072941.87 | 13240559.62 | 8874600.964 | 64834504.59 | 27916396.6  | 30431642.22 | 32875150.19 |
| 4313423.378 | 68502815.15 | 5691546.626 | 29956347.13 | 7522494.941 | 36201176.98 | 43599533.96 | 7244328.882 | 38416767.38 | 58803730.18 | 22637274.06 | 50601038.21 | 33913888.98 | 34269221.46 |
| 33672677.2  | 44203607.57 | 38196970.31 | 21020753.38 | 19484216.45 | 22268492.06 | 30349463.68 | 13201972.26 | 41731425.71 | 56666628.45 | 26311739.06 | 37287695.63 | 35034596.87 | 32666434.95 |
| 57684770.62 | 39890132.74 | 50715256.31 | 54906508.61 | 38504501.42 | 24479728.92 | 16722355.46 | 19346840.01 | 38710824.33 | 36910799.04 | 16578831.62 | 40742620.65 | 49949145.36 | 34773488.18 |
| 32082277.74 | 1590742.916 | 3005586.835 | 931927.8362 | 9052944.654 | 6684651.451 | 6037584.039 | 7396881.399 | 3250816.651 | 2868740.329 | 1641891.103 | 16802245.74 | 16467816.24 | 17506576    |
| 59536673.02 | 19982400.47 | 26933859.11 | 8817507.664 | 20520929.71 | 18543284.78 | 27578706.44 | 14413211.1  | 14498812.34 | 22769454.08 | 17224828.26 | 34020983.59 | 24924452.45 | 21372295.85 |
| 22858674.2  | 52159193.17 | 40009304.14 | 16475996.62 | 20409811.6  | 46885638.36 | 25312513.26 | 30249623.3  | 83174393.1  | 110101382.9 | 41703653.83 | 48908482.61 | 44812400.74 | 48012554.36 |
| 8729930.698 | 34338976.97 | 46128000.73 | 14803477.34 | 17050828.36 | 57205872.17 | 46665792.78 | 48788445.84 | 10308250.05 | 28434604.43 | 18274432.88 | 28495010.15 | 39604848.43 | 46034051.47 |
| 56919441.47 | 17954387.66 | 20870020.26 | 36805723.99 | 26884112.28 | 26945175.9  | 103624061.1 | 21810323.37 | 7505515.872 | 7504793.808 | 50237304.39 | 34971528.85 | 31160189.94 | 33217486.01 |
| 56648794.81 | 7480728.086 | 14519254.26 | 16539570.47 | 6625467.113 | 19349425.95 | 100303212.3 | 6584351.093 | 4577171.707 | 2681961.84  | 26448243.81 | 16137896.4  | 22273037.46 | 26159475.25 |
| 27222531.47 | 62695022.63 | 44156009.82 | 57621370.44 | 47237626.89 | 60356316.38 | 27632987.68 | 63613522.17 | 46216933.51 | 52206583.98 | 41978464.63 | 35173171.6  | 46928481.19 | 43126938.97 |
| 3752631.873 | 10166346.08 | 7008803.772 | 4136658.793 | 9511188.681 | 9268142.359 | 6019323.816 | 9028084.526 | 3634089.249 | 9701931.523 | 4780150.172 | 4938358.159 | 9526583.55  | 9557572.402 |
| 14861689.32 | 14269063.53 | 14615650.56 | 5096606.827 | 3995412.616 | 10217836.16 | 6621751.987 | 6243671.899 | 4748668.656 | 8905070.639 | 11163591.92 | 35154785.22 | 20751595.73 | 19129887    |
| 474921.6147 | 1723548.88  | 1519327.654 | 1104504.841 | 1944495.662 | 3680945.045 | 3626922.666 | 1714947.085 | 5525066.227 | 2222821.928 | 3974001.929 | 15014481.34 | 8599351.025 | 11136826.36 |
| 31309921.91 | 16059764.51 | 12333102.44 | 15085220.31 | 4345583.402 | 32073630.91 | 13369102.24 | 16966764.48 | 8901408.607 | 7925145.125 | 17816845.4  | 35032834.31 | 21265157.04 | 19136848.12 |
| 15853354.81 | 15216061    | 25009158.73 | 8736593.721 | 18850925.95 | 23841623.54 | 31959337.42 | 17978083.88 | 22348844.29 | 46589296.21 | 37027352.57 | 31222042.09 | 34569735.74 | 46487273.18 |
| 39699083.78 | 7175204.219 | 14214337.4  | 63166353.24 | 44612584.85 | 10837320.52 | 42427427.52 | 6668430.866 | 3332750.73  | 3017457.425 | 28647885.44 | 25258436.07 | 21188259.33 | 21729436.21 |
| 11135016.38 | 26751503.27 | 9751271.063 | 12785449.5  | 31546436.56 | 33731774.59 | 16394890.16 | 36362224.04 | 17769402.59 | 10959929.15 | 6819298.533 | 37323606.71 | 24993745.16 | 23574795.74 |
| 41879825.76 | 14357139.78 | 50862306.47 | 44908063.91 | 23849376.25 | 62794870.68 | 45334307.47 | 40215446.77 | 35398209.46 | 38421946.85 | 34655739.51 | 52607196.39 | 39019611.07 | 56584879.29 |
| 5670715.712 | 16123640.02 | 11791812.74 | 10640147.03 | 17280176.38 | 24023024.07 | 28112376.84 | 35677002.42 | 35366004.24 | 16829539.07 | 7426263.685 | 15954457.3  | 22117677.4  | 21869475.67 |
| 39248998.19 | 45003023.85 | 41284281.25 | 39060717.51 | 56036261.92 | 41390922.26 | 88523570.54 | 32754757.33 | 54803690.8  | 49028513.7  | 54168083.74 | 39777546.92 | 43609124.57 | 47609955.31 |
| 50633681.35 | 2170283.63  | 4507797.325 | 6653607.616 | 4949881.428 | 19674923.97 | 2910307.108 | 15946814.5  | 1988426.702 | 948599.1623 | 4595505.129 | 27408131.48 | 14985582.34 | 16346320.65 |
| 50473705.69 | 6423478.333 | 32304561.28 | 4495089.549 | 6463246.259 | 24490199.05 | 5784258.548 | 16384848.12 | 8443088.502 | 82839250.49 | 3075275.742 | 16621140.81 | 17145206.96 | 19878673.78 |
| 16216323.83 | 54092480.46 | 43813593.7  | 19567877.56 | 32756306.54 | 56618987.99 | 30925195.9  | 47695581.07 | 70755503.1  | 65122712.59 | 23842302.51 | 35162831.98 | 45025125.66 | 51138024.12 |
| 13750176.9  | 37306649.81 | 11181397.19 | 8847040.369 | 8187432.753 | 28914840.54 | 20251918.32 | 20248037.44 | 11984352.37 | 37846617.02 | 13078770.24 | 24879370.86 | 24436756.97 | 21460865.24 |
| 2227823.23  | 4120420.203 | 7340435.193 | 360475.0303 | 620904.8295 | 2426235.841 | 2924485.188 | 11927042.36 | 6717744.649 | 5027720.395 | 1415835.249 | 6976254.373 | 4509850.285 | 3989747.366 |
| 1527656.802 | 13404564.84 | 75278594.27 | 5549351.672 | 13567588.69 | 9743484.571 | 87942897.94 | 10926431.85 | 10542707.51 | 14034172.66 | 3039042.777 | 14609227.91 | 11984531.63 | 14736241.02 |
| 7467871.966 | 13273537.18 | 36403322.51 | 5432329.106 | 16799807.4  | 31751555.55 | 39415719.2  | 26404595.98 | 46813517.95 | 31435123.17 | 8225458.306 | 14196995.49 | 26847893.12 | 30334595.23 |
| 47843196.89 | 18578656.47 | 25624800.3  | 29869669.63 | 36901886.72 | 34940420.7  | 75256740.66 | 24680203.28 | 9650744.177 | 12687608.23 | 52068015.16 | 27167397.77 | 35673587.85 | 32433263.79 |
| 13259170.27 | 5252009.019 | 6923952.373 | 1883593.39  | 3366189.606 | 13110243.71 | 9689006.739 | 12109422.4  | 14121315.67 | 6038000.706 | 4842491.634 | 18300139.82 | 18573345.01 | 17758988.62 |
| 6791660.684 | 3327068.554 | 2516530.987 | 1241607.511 | 1082158.421 | 5496041.434 | 1549370.045 | 4803433.9   | 4974414.405 | 11413143.41 | 5809401.231 | 20632414.31 | 11715344.63 | 14231789.46 |
| 3684939.404 | 25272325.88 | 5888916.317 | 774975.3775 | 935281.4554 | 2152074.396 | 1737822.578 | 886820.2892 | 19195852.74 | 20414007.36 | 21732003.66 | 20875552.7  | 13306465.87 | 12563693.28 |

|             |             |             |             |             |             |             |             |             |             |             |             |             |             |
|-------------|-------------|-------------|-------------|-------------|-------------|-------------|-------------|-------------|-------------|-------------|-------------|-------------|-------------|
| 6801852.859 | 27769812.36 | 8788245.918 | 7676281.493 | 16906905.53 | 7881303.397 | 10052735.56 | 8180647.984 | 20163827.34 | 15929466.89 | 21881772.91 | 18088615.15 | 14714082.14 | 14882700.4  |
| 12521988.51 | 41534421.73 | 15991135.53 | 24452529.41 | 61069334.69 | 59885576.63 | 21385513.16 | 65962178.51 | 50235992.99 | 57150985.27 | 23636994.29 | 28205614.91 | 26603412.03 | 37527029.6  |
| 18339217.58 | 23309160.79 | 15000783.15 | 6764760.541 | 15125980.13 | 13758301.22 | 15417206.53 | 11002746.97 | 25605986.4  | 17048954.02 | 33043562.38 | 26401671.18 | 15998566.78 | 16709367.03 |
| 30265932.74 | 20997652.78 | 23521587.37 | 36915453.24 | 44244577.31 | 27551444.7  | 47769449.11 | 29714022.51 | 34416966.04 | 35711304.39 | 34207716.83 | 42217360.99 | 29140650.51 | 28473397.92 |
| 15776584.79 | 37224834.87 | 34050846.05 | 27837845.47 | 32361939.83 | 33391071.21 | 51766159.48 | 42745626.28 | 51747571.58 | 47836702.39 | 42742036.38 | 31192409.07 | 31040999.69 | 35298341.14 |
| 8371559.924 | 16421757.3  | 15827017.75 | 12531334.72 | 16769985.84 | 10993085.29 | 16391190.16 | 28295021.89 | 37127611.97 | 36586262.44 | 13736561.58 | 22057339.98 | 26191763.11 | 27144050.51 |
| 16682517.77 | 35998661.03 | 26956125.24 | 9688101.187 | 26876460.66 | 10874870.81 | 6144743.675 | 9843111.031 | 46371248.89 | 71436535.17 | 51749778.55 | 23164681.21 | 13898854.26 | 17380628.63 |
| 14923147.64 | 42102507.96 | 24440079.93 | 19106132.59 | 56729036.1  | 31692346.22 | 24043938.87 | 37169162.36 | 36850404.66 | 57612346.17 | 19230390.65 | 29811718.11 | 39116307.94 | 37314884.2  |
| 18206891.18 | 23485564.17 | 23918655.32 | 13793827.61 | 19599665.97 | 50550081.37 | 41736304.57 | 43436422.4  | 19057322.74 | 28069220.11 | 21269879.33 | 40622602.27 | 37312902.05 | 42464811.86 |
| 13133535.05 | 22988239.39 | 51557929.57 | 22690863.95 | 38435190.38 | 61193647.44 | 37468025.26 | 69680964.13 | 32707941.08 | 37605804.88 | 20423074.23 | 22719031.78 | 38405234.71 | 38513070    |
| 16855832.83 | 36054665.73 | 22566425.65 | 12435984.28 | 22525482.15 | 25771469.44 | 12638500.9  | 22105986.55 | 31801698.05 | 50266940.81 | 12662091.05 | 16460856.55 | 17353993.11 | 21116282.9  |
| 39107348.17 | 15090966.87 | 28500674.35 | 32864480.84 | 18551078.4  | 27508066.75 | 53238804.37 | 9521583.858 | 6948075.908 | 11161687.3  | 43548558.34 | 19312674.24 | 21808083.2  | 26860645.65 |
| 38821935.5  | 18213323.07 | 23660444.55 | 18160343.41 | 25513346.86 | 20914643.1  | 45639502.75 | 19104036.43 | 10635021.38 | 17824953.26 | 11548686.04 | 35644977.19 | 26297688.78 | 25892317.1  |
| 17983635.85 | 15536237.17 | 31911249.2  | 9563125.046 | 25401015.5  | 21596765.38 | 14221337.38 | 23026256.91 | 37846761.24 | 44818443.41 | 17529793.33 | 35969941.78 | 21853653.02 | 28475495.12 |
| 15887700.68 | 17440209.01 | 10598820.16 | 3554893.535 | 8615691.682 | 20685859.46 | 5754271.21  | 9986865.026 | 3623672.534 | 15613621.56 | 4343560.394 | 29289523.57 | 18326685.55 | 15485142.67 |
| 8854720.064 | 7316431.68  | 13863665.54 | 3752529.808 | 10273138.24 | 11420510.05 | 13138340.42 | 12248648.01 | 43072671.83 | 28401972.86 | 12816861.16 | 21301629.54 | 14810731.5  | 23825623.25 |
| 12933509.84 | 5712004.604 | 12594948.19 | 1634042.727 | 3218894.033 | 30811203.75 | 21325662.65 | 13671433.72 | 6221691.145 | 26438863.22 | 4561325.655 | 25470858.92 | 14962663.71 | 14794540.12 |
| 1998732.677 | 34234989.58 | 22038727.3  | 13813678.96 | 29960292.59 | 30202031.35 | 14529958.35 | 17476582.25 | 56204159.56 | 22892564.16 | 11574414.44 | 33171079.1  | 24747949.29 | 20724678.17 |
| 4530172.225 | 9538421.834 | 11081171.87 | 2938407.675 | 11469044.64 | 21620666.87 | 10864459.73 | 14456018.86 | 16174767.86 | 10343824.25 | 6503208.503 | 15788354.8  | 17355526.65 | 10680056.96 |
| 4015269.091 | 1014104.954 | 27659605    | 16032091.4  | 31422038.99 | 2477331.444 | 1458758.615 | 5910114.688 | 23646608.69 | 68999621.32 | 1014757.187 | 2228662.313 | 2007506.479 | 1675819.429 |
| 2991688.609 | 7028028.793 | 5196453.143 | 4877952.432 | 10913455.64 | 25713788.06 | 10818501.12 | 18014841.62 | 7977859.075 | 4552062.771 | 3731072.733 | 19582673.49 | 11771578.2  | 14488819.12 |
| 36613298.5  | 18995450.26 | 14542576.34 | 15334019.1  | 13602400.85 | 11864720.17 | 9139474.062 | 18775219.3  | 15010501.63 | 20730670.33 | 19185653.83 | 31179159.56 | 18721549.16 | 17347066.39 |
| 13058229.68 | 21117890.87 | 21902490.12 | 8268556.652 | 18135996.38 | 12750579.73 | 19277224.34 | 15444143.61 | 52568372.51 | 33397748.85 | 13853547.81 | 22717826.33 | 17012039.9  | 20891488.94 |
| 224320.4125 | 936860.2876 | 486534.0951 | 341950.3245 | 778793.3984 | 967784.6332 | 880405.2942 | 1180924.764 | 1266070.037 | 525991.6457 | 318876.6869 | 3388705.515 | 3063567.867 | 3248981.233 |
| 12211448.6  | 18310672.29 | 18900346.09 | 9638296.211 | 19186324.94 | 25078753.11 | 20585275.77 | 26022870.87 | 4315423.101 | 40256145.85 | 15495127.39 | 25861446.7  | 23157373.35 | 23744938.87 |
| 28240153.37 | 3788842.22  | 2870577.964 | 42089237.89 | 5498165.253 | 13238618.17 | 1550150.473 | 6267368.257 | 4038496.93  | 7561612.499 | 23337070.1  | 11513008.06 | 10769427.4  | 10197117.01 |
| 2936962.421 | 25743277.43 | 4975178.72  | 3172672.701 | 6576862.952 | 5164103.005 | 6089507.511 | 5705801.91  | 66341933.37 | 7595873.791 | 3680659.903 | 4208905.111 | 5416215.036 | 7044499.393 |
| 9712651.162 | 24410685.51 | 16616016.52 | 10145036.52 | 24402996.54 | 23114227.9  | 18514253.49 | 28935506.61 | 34050805.26 | 32001595.51 | 13025334.95 | 29887010.35 | 20217905.36 | 23538112.44 |
| 2328406.104 | 4713193.645 | 7336392.948 | 4043320.801 | 6085221.381 | 4839399.745 | 4120281.642 | 5541155.465 | 5546941.164 | 6476153.722 | 2127034.549 | 11828096.39 | 15095018.7  | 19114252.68 |
| 35042127.92 | 19306864.25 | 40170875.39 | 18561960.06 | 18536053.63 | 54312965.44 | 27780097.47 | 42636327.73 | 36151617.8  | 35690261.37 | 39149224.85 | 29359114.32 | 30487877.22 | 35813883.38 |
| 34931708.96 | 9844612.536 | 12627727.67 | 27092702.4  | 11050274.66 | 17342161.28 | 14712730.5  | 4204140.868 | 2817122.209 | 6994198.702 | 18438980.61 | 11658569.83 | 22113641.99 | 15110392.51 |
| 14167292    | 28591756.09 | 37542064.04 | 21214110.83 | 29128949.31 | 26590900.6  | 6336766.146 | 31407488.57 | 32339434.05 | 34202424.2  | 16189045.16 | 34173658.18 | 29699894.57 | 40490909.13 |
| 7225070.154 | 1765607.327 | 13872289.8  | 1139362.577 | 4746743.093 | 10901286.37 | 11175123.42 | 21964509.42 | 9735973.336 | 5153690.428 | 2016556.235 | 10740538.56 | 7309505.679 | 6493081.542 |
| 9529374.542 | 37706394.82 | 26541781.61 | 8857686.918 | 29404814.52 | 26957874.41 | 20973754.01 | 32491531.1  | 37898452.86 | 38680944.86 | 7527240.172 | 26930023.44 | 21504471.78 | 20548507.79 |
| 2153477.544 | 5296546.244 | 3245269.626 | 3030283.031 | 5769285.946 | 5807256.951 | 6095908.628 | 5679097.847 | 3634088.487 | 2970392.805 | 2083925.253 | 11325862.17 | 7486013.666 | 5684366.172 |

|             |             |             |             |             |             |             |             |             |             |             |             |             |             |
|-------------|-------------|-------------|-------------|-------------|-------------|-------------|-------------|-------------|-------------|-------------|-------------|-------------|-------------|
| 1655483.969 | 1742477.571 | 10838948.91 | 3153586.145 | 9850122.704 | 11924587.15 | 48165232.67 | 42162450.03 | 1692208.391 | 4063792.971 | 1732000.765 | 5520961.589 | 9028819.923 | 9861125.801 |
| 32949313.51 | 11314827.71 | 16963298.11 | 15805615.02 | 12028871.11 | 22359992.68 | 45799946.99 | 9276423.583 | 3427045.693 | 3446596.2   | 20577533.81 | 17922464.14 | 16938716.95 | 15129047.64 |
| 32419131.02 | 8280572.77  | 10493912.35 | 33117094.62 | 12905638.34 | 12623584.04 | 15151630.6  | 9370817.289 | 4854598.605 | 3849829.8   | 23775175.79 | 13799710.66 | 16254911.4  | 18432885.44 |
| 7758448.615 | 20926602.39 | 29192617.29 | 7814308.126 | 13273691.99 | 20557788.05 | 10468057.93 | 17678223.29 | 22225354.54 | 17609205.28 | 5694733.511 | 13820969.36 | 16375476.88 | 10603311.55 |
| 7673096.894 | 6888291.297 | 6115307.963 | 4295543.427 | 6830484.285 | 6143676.668 | 7519385.365 | 7972535.001 | 8810412.442 | 8023128.036 | 4696557.706 | 12601637.09 | 10322205.22 | 10580401.25 |
| 10398063.02 | 15947826.79 | 19241131.68 | 3391164.333 | 9898063.802 | 49254720.95 | 28948825.97 | 24018143.51 | 18034428.52 | 50082419.53 | 6853512.615 | 30922589.38 | 26646960.69 | 22701104.86 |
| 9961335.27  | 35093957.47 | 36973667.74 | 19652651.89 | 33358844.71 | 54646728.16 | 30239257.37 | 29999357.75 | 7377792.685 | 42063549.75 | 27378701.78 | 14912584.77 | 20277631.97 | 21184943.49 |
| 3435839.425 | 2515705.594 | 6570470.331 | 2298884.84  | 1373700.342 | 4519025.566 | 2779273.902 | 5145165.143 | 1177319.623 | 59200333.55 | 3499405.087 | 4432069.15  | 4796269.096 | 6038702.799 |
| 12167532.68 | 18162418.77 | 18974498.21 | 7550024.558 | 20262068.28 | 22668669.79 | 19988733.6  | 21767973.6  | 29079217.38 | 30713632.78 | 13469675.38 | 27772964.31 | 20706230.15 | 20521486.35 |
| 10024856.45 | 18207429.24 | 12866234.11 | 15023882.58 | 42982443.73 | 19253155.07 | 33717576.56 | 39430848.13 | 53599311.04 | 21638784.34 | 21285581.31 | 15425226.71 | 26015648.5  | 17102507.32 |
| 9168859.997 | 24700429.78 | 34286946.19 | 5417601.673 | 16970098.8  | 23048868.04 | 20079643.47 | 25721476.53 | 28105357.97 | 37212998.65 | 11672354.72 | 20364416.16 | 23637279.43 | 24525961.09 |
| 1287359.276 | 5968448.358 | 6862731.998 | 1549755.973 | 4002868.328 | 9182545.204 | 2637762.19  | 11360181.59 | 14315213.48 | 14455928.88 | 3434953.114 | 8097131.36  | 9541485.209 | 10591319.2  |
| 25631718.72 | 7448553.712 | 12022432.24 | 14013130.76 | 16258390.8  | 13238878.87 | 56200640.66 | 6961006.795 | 5979891.002 | 5120744.391 | 20375563.84 | 14472646.33 | 18298290.73 | 17807501.45 |
| 22683065.61 | 26550607.13 | 20578576.03 | 13844569.57 | 25581575.11 | 24413582.46 | 38503957.9  | 28243153.58 | 25647479.57 | 29432083.05 | 15958176.92 | 27214929.07 | 23469485.51 | 21645823.32 |
| 11002143.59 | 17337940.12 | 19460778.38 | 12425236.65 | 22421734.25 | 25632090.06 | 20115925.62 | 32271838.27 | 32768545.12 | 39823335.48 | 14748462.59 | 16737335.66 | 24144926.12 | 26177360.08 |
| 20883641.34 | 18118359.65 | 16042591.4  | 16070679.71 | 39569954.81 | 11430034.53 | 21973503.42 | 12574779.32 | 27904917.03 | 26871510.61 | 24678175.05 | 25729785.06 | 12627984.03 | 18106735.88 |
| 8996225.748 | 16339447.78 | 16821743.75 | 10344985.15 | 19966659.53 | 11971560.96 | 12531984.48 | 13846731.81 | 18237977.47 | 20203411.79 | 9066930.107 | 22700517.91 | 14972905.64 | 15598429.08 |
| 7555078.357 | 17815375.82 | 18275248.13 | 9318175.815 | 31919447.63 | 12672145.52 | 16577731.64 | 9428915.223 | 26774363.08 | 18288514.87 | 9908828.998 | 22512842.53 | 14470561.24 | 15072992.42 |
| 27890732.91 | 7195730.424 | 9093706.058 | 4785266.453 | 8919337.785 | 23730529.44 | 11247577.48 | 29886280.06 | 18021159.44 | 11848549.55 | 8823355.841 | 14630422.6  | 13538394.93 | 17628624.78 |
| 27867665.6  | 4732330.951 | 8928557.728 | 17996282.27 | 11774109.76 | 8669318.867 | 25788058.23 | 3734835.284 | 3742891.421 | 2909878.546 | 24312172.49 | 12549600.08 | 11793146.77 | 11802670.1  |
| 13563299.31 | 9269027.475 | 10890140.01 | 17702192.29 | 15686157.62 | 12937971.86 | 2654949.651 | 2054211.466 | 4172582.327 | 5238212.381 | 35040488.29 | 11635549.64 | 8650306.772 | 12339559.73 |
| 6222097.46  | 6014747.423 | 1515908.965 | 4615534.394 | 38843104.29 | 1812634.645 | 1855565.75  | 12398243.56 | 1748105.01  | 2469166.622 | 2406424.476 | 9048114.602 | 7392933.557 | 7772389.768 |
| 13280330.4  | 4444186.651 | 7949378.07  | 1101194.198 | 2086269.63  | 12159162.86 | 13728469.85 | 4558507.163 | 2455395.855 | 18874854.61 | 1862099.989 | 16912941.38 | 11468997.1  | 10766363.48 |
| 15789659.65 | 22181106.65 | 27014694.26 | 13379604.57 | 24856453.64 | 25547378.96 | 26067461.18 | 27911532.41 | 32033920.34 | 35049392.97 | 19422935.2  | 20338008.8  | 24122206.77 | 20091207.01 |
| 5042812.084 | 9825582.997 | 8913630.827 | 2892724.267 | 3868606.882 | 14088132.34 | 10369303.98 | 9908682.744 | 9246911.598 | 16280852.41 | 5627842.33  | 14531017.64 | 12173108.05 | 10734058.52 |
| 3054010.404 | 6028901.451 | 3653342.934 | 1135783.516 | 1734322.331 | 1914814.894 | 1389812.622 | 1963835.276 | 761360.3439 | 707169.3531 | 1717603.64  | 5520384.413 | 4411251.348 | 4763159.974 |
| 9128272.197 | 17696018.64 | 19574099.89 | 8364121.197 | 15413362.35 | 18073517.78 | 17381411.99 | 24367413.86 | 26983905.32 | 28700602.54 | 10286618.59 | 17457707.86 | 17290179.04 | 20697821.62 |
| 4534164.449 | 5299255.619 | 5355456.351 | 2349709.062 | 12382034.87 | 4815706.78  | 5053859.069 | 10414832.12 | 3610303.276 | 3649127.799 | 3954631.368 | 11020364.52 | 9211446.381 | 9063081.807 |
| 25781768.43 | 10484652.91 | 11818830.44 | 9254158.38  | 4973402.921 | 15772800.41 | 14730390.82 | 5227541.281 | 4382731.606 | 3546862.622 | 14415699.7  | 15702322.2  | 11652983.86 | 11418790.25 |
| 12993383.94 | 23252546.86 | 29887854.3  | 15031363.72 | 28011145.89 | 21762965.47 | 21970307    | 27794234.26 | 45451143.15 | 48313770.54 | 18481479.57 | 15657422.87 | 18424904.15 | 21451995.99 |
| 8046020.36  | 19915762.93 | 11756934.93 | 3044274.256 | 6974717.952 | 9003268.732 | 9908892.568 | 6877075.653 | 16978525.93 | 17267087.05 | 12370276    | 15297343.24 | 11726429.45 | 9365417.458 |
| 3570465.004 | 27638030.78 | 9868936.93  | 9851190.585 | 10927219.13 | 13483559.54 | 5827244.692 | 8731252.188 | 15125143.27 | 32745983.24 | 6476832.842 | 20200804.95 | 13101889.68 | 12874767.91 |
| 18112341.8  | 3623728.916 | 3476933.903 | 29017320.21 | 6204887.059 | 6567424.396 | 10229940.78 | 1608940.346 | 2173747.919 | 1578563.297 | 17331131.12 | 10083187.03 | 7118435.873 | 9298387.982 |
| 1426640.303 | 12692319.22 | 11312841.49 | 19400817.65 | 34386579.52 | 6707246.453 | 4555800.763 | 19985961.55 | 23839879.11 | 20944290.19 | 5299788.426 | 14446703.07 | 11937747.26 | 10691479.07 |
| 7733498.474 | 16052050.75 | 16431033.25 | 7623011.872 | 11567095.49 | 14244422.93 | 15703470.79 | 13188353.27 | 16538318.27 | 14303100.73 | 7400015.171 | 20704536.65 | 16249595.16 | 14209923.03 |

|             |             |             |             |             |             |             |             |             |             |             |             |             |             |
|-------------|-------------|-------------|-------------|-------------|-------------|-------------|-------------|-------------|-------------|-------------|-------------|-------------|-------------|
| 10404946.94 | 22633483.11 | 20188324.99 | 7355295.922 | 19195372.71 | 24174025.72 | 17051148.85 | 23410385.1  | 27869095.2  | 27361651.95 | 14198326.71 | 22566843.58 | 19628665.12 | 19090066.32 |
| 4995867.353 | 14615014.3  | 1953541.984 | 2621396.452 | 34128860.8  | 2460936.64  | 2271267.259 | 11135275.31 | 1709080.945 | 1935585.153 | 1604042.252 | 14118614.56 | 8807902.396 | 8976615.834 |
| 185461.5539 | 293367.89   | 466087.6498 | 254232.1023 | 532032.9216 | 33720511.92 | 28889977.46 | 32294315.2  | 22560317.41 | 41006831.6  | 30752130.26 | 8628194.923 | 9756112.951 | 8891429.266 |
| 4226210.485 | 27076612.84 | 18966067.09 | 14178765.42 | 24642518.57 | 14795802.88 | 17801686.11 | 10189395.15 | 20485672    | 29472999.91 | 13281531.27 | 22966705.22 | 18634253.29 | 13285672.65 |
| 4235066.084 | 16557560.95 | 10903836.18 | 11773493.95 | 26570291.23 | 8241268.819 | 5774959.016 | 16730242.76 | 14669276.14 | 13127651.11 | 7631811.151 | 16220365.37 | 13738909.41 | 15043953.86 |
| 3726786.424 | 13480363.68 | 11913958.32 | 5351746.212 | 10313488.77 | 6058402.767 | 16474714.22 | 6502209.183 | 12606932.49 | 11585752.92 | 8540856.664 | 11286919.6  | 9251465.134 | 11583013.43 |
| 8779522.774 | 3084996.917 | 6851514.187 | 16898219.65 | 23646213.68 | 7708759.997 | 43956284.18 | 5541200.606 | 1408409.089 | 3243105.411 | 11242951    | 13601601.93 | 9599484.427 | 11389636.09 |
| 6947115.777 | 22489851.5  | 23332868.65 | 12570327.32 | 19091904.64 | 15947708.42 | 20516959.55 | 22773694.77 | 28163393.75 | 24323803.24 | 9118505.43  | 23749964.19 | 17084188.37 | 15454938.02 |
| 4218766.662 | 11483163.92 | 3288962.841 | 4610669.193 | 9445248.668 | 11506730.89 | 5496423.323 | 11702839.02 | 5545324.872 | 2921649.796 | 2794403.756 | 15412777.49 | 9349921.302 | 9081471.102 |
| 11869415.35 | 11586666.4  | 11781527.8  | 8677314.873 | 11945036.53 | 25187597.03 | 12093610.59 | 11593304.31 | 37581004.03 | 25740902.25 | 11220439.45 | 23551136.1  | 23078960.24 | 23118324.62 |
| 23284119.25 | 359478.2233 | 801823.172  | 4228215.346 | 437922.4064 | 652402.9656 | 560096.0913 | 651054.6233 | 548936.3957 | 577245.4061 | 428666.3969 | 4596541.097 | 2571959.805 | 2548838.896 |
| 9469832.23  | 16124143.93 | 24318319.85 | 13835966.6  | 22832093.02 | 27215082.09 | 19250339.23 | 26598020.39 | 35413987.27 | 27742528.4  | 12497938.47 | 22263247    | 21248897.61 | 20133238.2  |
| 5902507.302 | 16399789.49 | 21202371.74 | 8991587.436 | 19419657.97 | 20635360    | 7543187.449 | 20338650.81 | 14707190.51 | 20054386.32 | 8355653.788 | 12340625.9  | 17069743.64 | 20116910.54 |
| 7845708.353 | 8552206.51  | 45161756.89 | 15114526.48 | 27129597.82 | 19320848.27 | 18815099.46 | 27506096.35 | 10730767.34 | 23374211.18 | 14001284.87 | 21782281.02 | 23010076.1  | 20816748.15 |
| 7513434.007 | 16443076.7  | 15758380.44 | 9396785.928 | 16773101.17 | 16366459.81 | 13718769.37 | 13430917.96 | 22622418.82 | 29131825.14 | 8175799.992 | 15719677.92 | 18339497.92 | 19073961.64 |
| 6730943.675 | 19779185.81 | 18376612.44 | 6569008.168 | 20077306.79 | 15076688.57 | 13457691.35 | 24028172.02 | 24612727.83 | 25785060.03 | 9571766.185 | 17192382.06 | 19747170.11 | 18962856.57 |
| 2079118.418 | 1421551.53  | 2313270.582 | 1156151.046 | 1868376.11  | 1405472.606 | 4111383.828 | 1263309.697 | 1792894.339 | 2265774.043 | 3501690.975 | 6557566.657 | 5983863.548 | 6845585.469 |
| 14386837.18 | 1405285.938 | 4284386.53  | 22299195.06 | 14377489.37 | 10937870.27 | 40234286.07 | 10460474.4  | 850292.1884 | 2228776.199 | 5963785.278 | 8981411.234 | 7039777.013 | 7863007.022 |
| 20188253.36 | 12045574.56 | 7478468.085 | 8522641.624 | 10185042.39 | 8039172.239 | 24562294.99 | 5147120.091 | 7331970.673 | 6245726.1   | 27440842.37 | 14301903.57 | 10336687.83 | 9877152.803 |
| 10235024.96 | 12509922.26 | 11064251.12 | 8421053.426 | 18602632.56 | 10873546.08 | 15595624.03 | 19519135.19 | 19522838.07 | 17585025.22 | 14449052.15 | 21555005.84 | 13298660.04 | 14411443.56 |
| 21645157.42 | 2014620.867 | 5770657.986 | 16161662.56 | 7384432.662 | 6527782.144 | 22070630.64 | 6876516.558 | 1784988.402 | 2465635.399 | 6187721.616 | 7703180.162 | 7408870.7   | 7069066.058 |
| 8880547.976 | 10790699.65 | 17122207.29 | 10746368.54 | 20704998.44 | 13893552.96 | 14402800.9  | 15667773.91 | 21968001.9  | 10835114.41 | 20649383.22 | 21438592.34 | 16890484.41 | 17549879.72 |
| 21357119.2  | 2457246.434 | 4385653.441 | 3399846.424 | 5431416.08  | 7711851.294 | 6718910.303 | 3400734.247 | 3079765.112 | 6420500.415 | 5118618.906 | 3430513.549 | 3740405.78  | 4571953.504 |
| 14994438.11 | 3181581.848 | 4890870.456 | 25009953.58 | 20753276.17 | 3529904.708 | 24655809.26 | 2794325.214 | 2743550.007 | 1694710.84  | 16247049.03 | 13053328.9  | 9087153.902 | 8270802.177 |
| 20582695.7  | 17006404.72 | 16788250.78 | 17607230.94 | 19332987.02 | 12919194.52 | 22759615.56 | 22380326.86 | 24199792.18 | 27127088.29 | 13157026.39 | 14794801.16 | 18328857.42 | 17558868.76 |
| 3629092.153 | 8602436.041 | 14371853.38 | 10154268.37 | 29538649.76 | 16215075.21 | 17990881.16 | 16462402.68 | 10478522.51 | 14889348.32 | 5524346.635 | 10006717.98 | 10484691.17 | 11466028.28 |
| 4797880.224 | 16469443.86 | 17524000.11 | 5841267.707 | 12318024.15 | 19727384.62 | 12405631.27 | 24710912.46 | 12687951.48 | 18321846.06 | 8888979.301 | 13323819.18 | 15435313.12 | 17825867.12 |
| 4016569.264 | 3082847.727 | 2848926.467 | 1947453.424 | 3176265.25  | 2771488.432 | 3115731.653 | 3792202.777 | 3699528.803 | 3637885.887 | 2560991.403 | 6986641.697 | 5810969.975 | 5931474.608 |
| 640498.9161 | 7001458.164 | 2592390.614 | 240442.2884 | 11301374.12 | 381647.1238 | 4645306.059 | 372112.3596 | 22661522.11 | 5192826.418 | 5339188.512 | 4311608.873 | 3853238.44  | 3890220.919 |
| 5353941.173 | 10487123.36 | 9224146.829 | 6576572.262 | 1122521.311 | 12318154.36 | 10197583.73 | 15020961.31 | 34363620.31 | 17569925.54 | 7982269.414 | 15488581.13 | 13218417.41 | 14511832.51 |
| 20261026.38 | 19769004.81 | 2019282.948 | 5681088.981 | 28181039.43 | 5201652.658 | 1948187.658 | 13037597.63 | 3175429.956 | 15674709.77 | 6768310.293 | 17438298    | 9953484.951 | 10292080.53 |
| 764472.7564 | 5571182.175 | 2157446.763 | 680557.5838 | 1754794.883 | 356935.9514 | 625996.8469 | 290326.4796 | 10754624.83 | 805807.1035 | 5176639.692 | 3163283.604 | 2713361.365 | 2387489.441 |
| 496802.1029 | 7959336.147 | 10294688.87 | 3131729.6   | 5403027.796 | 5341394.565 | 6666478.131 | 5048901.353 | 12946805.05 | 10588371.12 | 3927524.245 | 12581778.9  | 8962988.22  | 7433050.634 |
| 5605314.21  | 9131722.747 | 3972140.949 | 12874741.48 | 9495054.208 | 8606220.333 | 6910045.01  | 7587130.656 | 9429250.051 | 5608751.975 | 9085170.88  | 7713868.85  | 8571172.085 | 7958049.034 |
| 19768619.29 | 21022452.36 | 25512103.23 | 15025206.97 | 18616816.95 | 21335030.43 | 16576500.03 | 17789336.24 | 26343637.8  | 26832024.4  | 18546807.59 | 13818512.01 | 17316678.58 | 18203166.34 |

|             |             |             |             |             |             |             |             |             |             |             |             |             |             |
|-------------|-------------|-------------|-------------|-------------|-------------|-------------|-------------|-------------|-------------|-------------|-------------|-------------|-------------|
| 848339.7083 | 6526054.865 | 11836992.63 | 16681917.18 | 20152743.88 | 13755812.34 | 15894669.48 | 24111148.92 | 34508202.27 | 2422717.019 | 14524941.95 | 12325413.13 | 18880059.65 | 24824294.63 |
| 4664298.859 | 11875129.89 | 13307362.6  | 4962090.706 | 11080710.7  | 7331547.173 | 10266402.96 | 10613827.77 | 19055395.17 | 14400618.24 | 7249334.533 | 12883886.55 | 11249842.7  | 9287385.259 |
| 5462953.539 | 9111280.995 | 30409607.18 | 7032599.437 | 13574617.5  | 21072285.86 | 15837707.11 | 12350060.26 | 24947807.61 | 19342518.93 | 8572739.754 | 13063326.07 | 14090429.6  | 15178396.74 |
| 12878447.97 | 16280696.73 | 15827436.95 | 6620231.503 | 13531617.09 | 16447534.85 | 14119685.42 | 17331324.45 | 20906033.94 | 22053843.6  | 12247815.02 | 14484927.29 | 10798076.78 | 15312698.12 |
| 1787206.571 | 11433378.13 | 8836251.224 | 2305822.912 | 3518676.2   | 9619092.056 | 2658526.153 | 12324665.29 | 24964928.13 | 5611585.141 | 6633500.663 | 15041322.99 | 9182026.049 | 7671010.206 |
| 5763935.309 | 3153012.856 | 1818666.013 | 2951138.512 | 4835116.83  | 2905284.579 | 5113223.958 | 2409174.171 | 3242149.919 | 2893627.32  | 4705700.82  | 6859945.933 | 4270353.627 | 5287858.64  |
| 3056336.595 | 8452048.764 | 11244143.92 | 4208637.584 | 8148811.941 | 6216254.855 | 4612244.689 | 12525069.61 | 22214838.96 | 17042422.34 | 7267088.165 | 11359555.83 | 9917786.289 | 9326276.763 |
| 3964708.825 | 20656375.99 | 20827963.54 | 5871195.976 | 16956648.55 | 11531203.62 | 6812646.561 | 11482330.08 | 11585481.83 | 9693921.668 | 4111298.436 | 9080766.087 | 13242805.56 | 13075512.22 |
| 3917323.058 | 2538805.178 | 6053882.358 | 1502853.386 | 2558338.429 | 34608388.89 | 7985388.007 | 1511031.445 | 3514934.632 | 14361436.4  | 12202329.32 | 8548108.371 | 11185676.91 | 11223913.5  |
| 10862253.91 | 5208344.158 | 4506421.047 | 15287006.36 | 3440261.243 | 4702837.912 | 27562111.84 | 1821733.066 | 1158541.054 | 1431860.918 | 23245869.76 | 6870766.328 | 9403740.765 | 10678664.11 |
| 18419899.65 | 3322469.022 | 4890894.466 | 4777376.799 | 1514615.028 | 5183967.309 | 16477257.29 | 862260.9477 | 2322209.785 | 896702.4467 | 9247118.963 | 4649569.252 | 5780139.645 | 5931051.308 |
| 3030961.886 | 20458583.93 | 9290642.871 | 2714715.331 | 2648168.303 | 2677554.48  | 3536077.897 | 1450071.991 | 14385233.11 | 14312681.65 | 13059002.2  | 5876742.252 | 7301870.611 | 7888325.494 |
| 2050886.202 | 9419945.107 | 6723048.725 | 4535784.137 | 13799962.14 | 5484404.302 | 3723765.417 | 1894008.451 | 34324349.96 | 9800661.164 | 3091208.347 | 8465306.565 | 7171922.973 | 5233587.788 |
| 10770329.89 | 20193712.46 | 18893685    | 10101256.63 | 12726928.08 | 8311266.087 | 17777576.35 | 6584993.35  | 10498247.22 | 12567094.54 | 5452798.919 | 9983677.567 | 14218110.27 | 13868268.32 |
| 18109828.01 | 5505915.916 | 8145725.893 | 16021855.77 | 19364196.79 | 8258269.702 | 30893246.66 | 5493585.856 | 6965850.846 | 9550399.587 | 11827691.78 | 14246673.42 | 9598895.649 | 10446115.83 |
| 5546799.819 | 16166311.5  | 13577927.32 | 9033979.054 | 17558358.67 | 16262041.65 | 17047477.15 | 18170679.06 | 25350557.63 | 28009115.99 | 10536955.43 | 17609127.95 | 15033225    | 16483074.6  |
| 1181848.007 | 1803551.904 | 1699680.815 | 1210826.887 | 2434286.805 | 1970204.63  | 1800391.215 | 2138765.073 | 2199629.413 | 2425246.423 | 1468385.435 | 4866188.687 | 3937505.16  | 4343817.121 |
| 1510484.656 | 2785563.235 | 2095385.093 | 918159.6894 | 1583004.626 | 979554.8159 | 1120303.478 | 2650382.294 | 3305613.98  | 1768712.991 | 1106814.269 | 4812826.912 | 3972281.628 | 3945848.406 |
| 9221133.415 | 19462947.29 | 8866563.658 | 9594103.705 | 5858573.646 | 4389653.633 | 4304368.988 | 2016662.423 | 3482313.373 | 2232838.122 | 9795632.257 | 7747351.062 | 6641230.258 | 10550265.22 |
| 6687289.643 | 6329111.45  | 5668874.966 | 4199461.142 | 4232250.85  | 4876332.693 | 3718929.245 | 9257573.447 | 4932935.484 | 5027319.493 | 4313923.205 | 7778798.793 | 6516887.893 | 6715911.402 |
| 9028160.427 | 19097989.17 | 14963256.09 | 19236240.44 | 20559591.01 | 24067188.77 | 12276524.12 | 23543227.6  | 22000055.92 | 19069584.44 | 17318384.26 | 12367255.48 | 19342989.42 | 17371798.05 |
| 5957637.08  | 1820243.148 | 820970.4465 | 9861148.971 | 1050591.387 | 1011929.212 | 1447319.073 | 741926.7439 | 7129576.394 | 4914192.093 | 21460338.24 | 1294791.4   | 1272463.766 | 2203372.727 |
| 5644503.129 | 18847926.3  | 21216108.62 | 9162909.016 | 13136965.72 | 9641482.814 | 14409341.8  | 9342988.606 | 19194838.53 | 23972124.29 | 5592581.519 | 15196641.33 | 10881140.61 | 12292203.44 |
| 5011541.99  | 10136237.58 | 10022215.14 | 4045798.541 | 5299336.104 | 7566130.326 | 5166569.74  | 5365499.656 | 15302023.7  | 10973857.06 | 11801338.68 | 10144669.52 | 9116382.696 | 12348514.49 |
| 16793648.75 | 12330949.28 | 12983316.86 | 1698869.787 | 14370209.24 | 12355067.44 | 28884292.13 | 11699138.28 | 12139783.76 | 6560936.005 | 13241933.1  | 15155806.7  | 8647854.76  | 8995599.986 |
| 4757009.857 | 17834737.66 | 13760879.95 | 11584691.99 | 22951782.31 | 10348681.34 | 6394669.379 | 9752472.051 | 9098328.672 | 14303293.79 | 6472394.844 | 10407903.24 | 10951015.04 | 12488535.49 |
| 14467686.5  | 3095294.904 | 10912166.89 | 18380109.99 | 1414773.324 | 12937435.67 | 11095054.04 | 5045117.282 | 6741549.709 | 2477124.029 | 17080140.71 | 16237734.3  | 12035605.95 | 11115686.59 |
| 4580942.32  | 17904968.77 | 6447431.646 | 6009298.167 | 17981617.73 | 4934792.244 | 4931318.205 | 5730446.563 | 3214345.744 | 6269151.236 | 3417429.529 | 11158564.72 | 5873885.52  | 7338766.715 |
| 8148391.949 | 17628931.05 | 14327746.2  | 5626807.08  | 6557443.921 | 6349082.776 | 4914143.548 | 14761621.01 | 9592492.276 | 11458322.62 | 9875563.621 | 12746225.99 | 10238954.58 | 12245696.69 |
| 6375722.657 | 12841678.8  | 11492870.25 | 7139208.308 | 14379130.34 | 8353196.465 | 10707851.59 | 10710778.8  | 15433806.95 | 14893993.32 | 9859295.643 | 14301280.66 | 12070654.67 | 11353543.42 |
| 1309897.625 | 2285764.845 | 9579811.242 | 2219059.989 | 2558864.239 | 3987665.215 | 5848441.536 | 10021058.66 | 5358804.914 | 2353543.003 | 1334110.017 | 8476783.568 | 5330380.231 | 4258654.614 |
| 7111290.915 | 3035571.909 | 4351582.166 | 3707760.41  | 9377291.651 | 12669733.79 | 7759387.087 | 14682564.1  | 3106844.176 | 1674574.891 | 1173817.176 | 11069287.09 | 7448050.625 | 5888870.067 |
| 15454543.52 | 5034888.491 | 8322619.107 | 9520299.253 | 5672402.008 | 6191297.986 | 9023230.618 | 2514736.2   | 2255244.807 | 2875535.802 | 10354823.69 | 7226426.561 | 6402336.814 | 6266932.514 |
| 8550430.302 | 17184963.18 | 20440120.01 | 16146746.94 | 14166013.46 | 10683372.41 | 14097111.44 | 9444603.169 | 24512708.29 | 16562236.49 | 11369541.06 | 11008147.9  | 6368289.229 | 13945180.25 |
| 10641984.17 | 11140476.55 | 16513465.3  | 6925481.748 | 16838217.61 | 21896694.05 | 27863985.21 | 2338006.868 | 1807442.443 | 15087079.62 | 4843263.453 | 8011392.127 | 8454689.488 | 7780937.862 |



|             |             |             |             |             |             |             |             |             |             |             |             |             |             |
|-------------|-------------|-------------|-------------|-------------|-------------|-------------|-------------|-------------|-------------|-------------|-------------|-------------|-------------|
| 2057769.144 | 5210461.752 | 15104854.12 | 4009109.064 | 5057716.281 | 11456542.38 | 5316854.196 | 5694546.575 | 10342430.75 | 16511534.99 | 4117746.43  | 8774821.039 | 7565271.898 | 6920512.181 |
| 5043281.508 | 16838538.59 | 4174996.121 | 6912614.045 | 11613858.95 | 5950747.401 | 10355718.28 | 16896228.33 | 22372831.14 | 14011913.03 | 5548259.24  | 13893255.72 | 15686899.1  | 15494570.89 |
| 4193182.956 | 7790927.944 | 5250116.696 | 4163025.287 | 11471329.66 | 18557892.06 | 12218184.23 | 17290086.77 | 23128139.46 | 14982754.89 | 6420292.136 | 15049769.74 | 17941524.98 | 14318738.91 |
| 8303003.555 | 5693885.43  | 5106594.619 | 3038924.491 | 6738297.77  | 22041316.42 | 6966427.164 | 15036838.97 | 4100097.787 | 12577452.33 | 2374632.421 | 7476076.134 | 6284821.718 | 8639273.088 |
| 7514523.581 | 12313116.4  | 7365351.612 | 8042442.826 | 9902035.944 | 10757278.42 | 7976084.993 | 8050437.808 | 13711069.4  | 9966919.571 | 8139981.144 | 11740403.65 | 9923459.772 | 9638070.553 |
| 7860501.528 | 9820988.309 | 12087940.4  | 9711789.278 | 12745573.03 | 9669050.745 | 10205496.8  | 9334759.371 | 13212382.45 | 13063909.8  | 12043110.27 | 9560745.834 | 10218930.9  | 14829617.29 |
| 14721090    | 2195629.838 | 613941.6782 | 9945855.933 | 2357813.44  | 3479610.401 | 3445959.802 | 1513293.084 | 3350714.045 | 1619390.65  | 4525831.118 | 6150342.516 | 6110681.462 | 5815982.197 |
| 3247749.557 | 2794781.569 | 3545498.695 | 1862044.276 | 3307672.847 | 2000639.064 | 3877923.957 | 2582237.635 | 2968378.512 | 3376621.506 | 2539103.212 | 5042226.977 | 5969040.183 | 4906445.029 |
| 754718.1741 | 16317086.21 | 4993128.378 | 4556715.039 | 7725561.039 | 6410120.544 | 4383351.484 | 6098511.043 | 19605273.59 | 14455329.6  | 3109115.576 | 7079917.845 | 7252373.111 | 5771843.471 |
| 5308046.909 | 8896937.151 | 14236516.45 | 4966610.781 | 9038037.244 | 11610469.41 | 9459739.837 | 11089789.59 | 10449237.15 | 18721004.72 | 3957711.04  | 8120810.889 | 8941129.215 | 9478650.223 |
| 6786610.301 | 7708966.328 | 9939680.844 | 5105390.135 | 9876768.382 | 6780945.634 | 4622092.215 | 9905567.567 | 11339535.09 | 10713760.03 | 7548251.949 | 11940610.86 | 8703328.658 | 11733481.63 |
| 6563110.094 | 437640.9266 | 7407156.26  | 6454525.754 | 12582246.02 | 8195760.595 | 6886709.975 | 10125285.74 | 534289.5738 | 11196457    | 6530374.892 | 14149380.96 | 11193586.87 | 11948642.92 |
| 2966373.811 | 15534390.87 | 10672816.34 | 2096141.625 | 1836730.769 | 2507737.131 | 1120026.742 | 1855981.406 | 1721110.453 | 1823334.266 | 1341472.924 | 3264319.52  | 2797915.115 | 2460076.832 |
| 9576393.341 | 14998570.18 | 16846657.45 | 7041061.435 | 12371181.17 | 14691385.75 | 20816926.56 | 16865675.94 | 12238225.55 | 15976422.93 | 6489494.006 | 9964402.875 | 13267757.58 | 15819968.27 |
| 2555639.189 | 6867411.842 | 6307608.512 | 2997487.606 | 6835589.574 | 5654377.17  | 4540978.094 | 8246205.374 | 9429360.887 | 10996420.03 | 3317701.121 | 6855921.143 | 6731001.326 | 7845573.072 |
| 5581985.095 | 1742895.071 | 2175665.251 | 9600886.143 | 10224475.48 | 2473477.636 | 24314909.33 | 857145.3525 | 1087731.148 | 676177.463  | 5712986.717 | 4614419.216 | 3998597.787 | 4602183.252 |
| 1072895.824 | 14720565.34 | 8154475.591 | 4290380.966 | 14152260.27 | 4922126.949 | 12496932.14 | 15783214.02 | 13587344.61 | 20157888.32 | 5323063.201 | 8821899.619 | 9921674.137 | 9019651.351 |
| 1652435.939 | 753863.9068 | 1311847.426 | 1989268.014 | 2171057.336 | 1945593.113 | 2742767.02  | 1072531.766 | 591118.6562 | 606211.2892 | 1920061.883 | 1747355.14  | 1295496.705 | 1317780.512 |
| 7748010.449 | 7051150.205 | 9596928.358 | 7328278.943 | 11972369.53 | 15171836.86 | 8316209.691 | 19294987.54 | 21236317.19 | 11300614.92 | 6767508.532 | 13043384.99 | 11838487.03 | 13471604.78 |
| 12164691.32 | 6939437.617 | 4652233.941 | 4385583.744 | 7276211.69  | 11598441.91 | 5191307.465 | 26214242.57 | 13473902.21 | 7732317.551 | 5351935.392 | 9612964.215 | 8715931.96  | 9767376.763 |
| 9712848.55  | 6339882.605 | 7833127.192 | 2173611.847 | 4339708.16  | 10528015.3  | 6139519.503 | 12824449.07 | 9311369.552 | 12284854.95 | 8021134.373 | 12862037.43 | 8488230.273 | 8933505.588 |
| 2354098.555 | 14361565.18 | 3655437.868 | 2348593.76  | 6521175.654 | 3753744.297 | 3811830.473 | 4299301.187 | 7273534.572 | 9704140.932 | 2997888.769 | 7790668.861 | 5424789.455 | 4845563.511 |
| 9172205.077 | 5192562.767 | 11292337.5  | 1431549.06  | 2563266.929 | 15153533.09 | 9374097.558 | 7431015.485 | 5210622.508 | 14650445.91 | 3235141.439 | 12814513.05 | 9391577.95  | 7863713.498 |
| 3607673.174 | 9650882.52  | 9307835.476 | 1013521.644 | 5639257.049 | 1774806.541 | 7369586.491 | 12584520.96 | 9162552.964 | 6471691.18  | 4189909.77  | 9549845.504 | 9709282.695 | 11697242.76 |
| 10276765.98 | 13710696.26 | 9673826.798 | 11784065.92 | 12181333.11 | 19344578.57 | 15011152.83 | 22003850.22 | 17398933.78 | 11378096.27 | 9015392.441 | 12657531.88 | 12682692.44 | 12435622.94 |
| 334779.8228 | 159905.7177 | 707810.5399 | 328593.9891 | 441286.8491 | 251170.7075 | 590945.2526 | 137786.9907 | 731770.0859 | 380325.1518 | 202310.9859 | 920022.7293 | 635130.189  | 988593.6733 |
| 9254096.908 | 13968710.94 | 10366099.14 | 8925468.615 | 9614471.564 | 11467075.62 | 7173533.072 | 14231629.62 | 14231669.08 | 14996736.67 | 6415746.022 | 9128621.155 | 7974596.08  | 9733362.951 |
| 4793918.873 | 6472546.645 | 5530410.579 | 5191623.467 | 8236754.563 | 6052185.627 | 8849735.06  | 6955803.095 | 6010619.082 | 5807676.407 | 3825003.46  | 5773315.36  | 8390836.179 | 7569475.882 |
| 1148623.913 | 3635488.571 | 1374080.286 | 221532.1174 | 1387058.061 | 1262973.319 | 1384625.238 | 1173466.623 | 2825941.799 | 5526948.317 | 3434155.509 | 2594673.719 | 2355090.457 | 2502954.568 |
| 1821363.37  | 2807938.929 | 1284389.587 | 1516399.439 | 1139316.409 | 1621692.213 | 2095589.817 | 777943.6291 | 3337743.185 | 3237708.231 | 3822789.444 | 2100509.154 | 2762704.608 | 2023453.415 |
| 1478708.018 | 473047.0473 | 2577138.752 | 165791.0961 | 330527.4078 | 2002845.047 | 1832340.421 | 3839449.953 | 456038.4114 | 245893.6205 | 264232.4656 | 2080301.09  | 2165414.452 | 1547599.738 |
| 4311388.004 | 10155746.63 | 7437932.771 | 3440786.935 | 6341840.666 | 6840906.749 | 5295603.201 | 7950312.49  | 11173008.51 | 17289353.78 | 5554847.508 | 10320316.51 | 7411891.329 | 9380718.909 |
| 2280731.686 | 2497182.989 | 2449926.397 | 1127382.599 | 4215359.231 | 3445983.458 | 4288302.974 | 2060167.557 | 4592424.329 | 4190619.276 | 1632564.288 | 4649204.195 | 5664181.488 | 6700481.729 |
| 3446154.178 | 7464718.667 | 8418986.506 | 3474867.063 | 13689519.08 | 7381469.093 | 5819291.456 | 7814428.373 | 12265134.35 | 10784519.79 | 5340210.396 | 11957993.67 | 7572447.227 | 8410930.568 |
| 5881146.498 | 7040645.855 | 7228739.858 | 5119968.128 | 11273773.06 | 17017313.54 | 9313817.837 | 13777503.58 | 2149904.476 | 15252437.43 | 10132824.96 | 7150257.402 | 7003874.766 | 8168796.073 |

|             |             |             |             |             |             |             |             |             |             |             |             |             |             |
|-------------|-------------|-------------|-------------|-------------|-------------|-------------|-------------|-------------|-------------|-------------|-------------|-------------|-------------|
| 2989672.866 | 8812992.85  | 6371575.107 | 521616.2599 | 673598.2791 | 5130705.514 | 1076125.232 | 5607856.242 | 22086827.82 | 16254224.29 | 4664830.716 | 2939009.637 | 2420041.185 | 2023029.037 |
| 5539098.043 | 5174766.83  | 7148060.031 | 2298667.039 | 8236451.248 | 5223710.465 | 21642285.54 | 6438150.758 | 10263863.82 | 1860947.814 | 4136181.594 | 4943492.246 | 9755328.161 | 6348259.938 |
| 11758844.9  | 2388479.961 | 3444803.335 | 1240475.653 | 1682521.285 | 5256481.773 | 5004171.451 | 17626061.45 | 5617626.404 | 4655900.029 | 1935512.851 | 5576570.87  | 4684842.745 | 4248012.087 |
| 3252534.768 | 7335233.85  | 4830047.78  | 4182334.319 | 5427415.389 | 9021996.505 | 5344556.123 | 10675968.27 | 14481173    | 12212728.27 | 4028241.665 | 7523644.816 | 9337170.384 | 5530913.941 |
| 1061515.08  | 7284338.384 | 11666518.47 | 1088447.219 | 4071463.377 | 6611874.252 | 2733995.434 | 10590141.18 | 2029565.907 | 6448024.165 | 2467863.763 | 7141414.112 | 7391930.552 | 7153842.481 |
| 3038949.585 | 12418390.97 | 11171434.73 | 4069140.64  | 2533205.696 | 6714422.69  | 3082849.078 | 10124546.7  | 11397718.16 | 9548639.732 | 5591221.696 | 10412572.07 | 7197160.214 | 6690714.611 |
| 3420795.155 | 3324852.255 | 3391950.808 | 3454127.949 | 7275460.34  | 3558356.977 | 20475014.21 | 3525536.013 | 3971833.945 | 1311331.146 | 6766417.184 | 3089504.662 | 2609360.252 | 4493806.651 |
| 2058222.649 | 3592779.829 | 3729573.527 | 3085787.409 | 3033005.471 | 9508895.302 | 3038096.172 | 17407592.41 | 4144044.333 | 12802142.46 | 3803117.264 | 6095413.381 | 5849385.787 | 6348391.348 |
| 985799.7503 | 2622504.47  | 1898106.167 | 1556632.583 | 2209161.664 | 3338796.38  | 1607243.354 | 1946211.179 | 2066136.101 | 2049648.569 | 1419164.468 | 4000081.711 | 3418470.226 | 4792196.084 |
| 1146982.124 | 1375101.951 | 710883.4105 | 1470069.443 | 1474528.97  | 1047705.432 | 1447989.851 | 2199156.918 | 2030910.565 | 3832763.631 | 1694229.244 | 2490090.92  | 2234262.23  | 2441565.277 |
| 4640955.097 | 3203385.376 | 19588597.67 | 4084473.25  | 15335051.27 | 18911109.91 | 16080776.89 | 2722583.931 | 2500761.45  | 7107614.007 | 1278874.086 | 5342272.311 | 5576196.414 | 6854801.468 |
| 1618027.481 | 9000434.527 | 10750888    | 3901967.964 | 8010545.517 | 12449508.8  | 5861885.463 | 11219877.54 | 20503393.55 | 12977055.89 | 2252107.032 | 6087691.468 | 7439039.707 | 8167480.042 |
| 3450557.881 | 7310084.095 | 4877561.207 | 6667651.079 | 15323848.57 | 4093036.483 | 5876511.364 | 5028843.107 | 5805930.056 | 3656453.835 | 5364177.978 | 4153185.513 | 3381036.102 | 4792877.331 |
| 1031019.235 | 2649176.58  | 2554642.483 | 1677094.958 | 2243664.798 | 3012278.253 | 1486529.301 | 2788621.569 | 7856692.324 | 20643280.14 | 1044970.84  | 2269410.902 | 3720468.41  | 3390298.348 |
| 934571.9526 | 1682088.694 | 1468771.182 | 605866.6162 | 945338.0557 | 7281813.434 | 784070.3557 | 1736214.217 | 14302417.27 | 3685208.82  | 7286846.585 | 4622790.909 | 4574669.673 | 6312297.408 |
| 2235151.153 | 2400558.297 | 3026978.265 | 1205063.552 | 809901.4674 | 5937811.801 | 2433427.242 | 925323.5634 | 659428.5474 | 510790.1282 | 2596996.819 | 3278632.301 | 2538344.16  | 2776556.184 |
| 3604331.264 | 7962607.187 | 5432148.611 | 3796895.228 | 9689298.874 | 8896601.088 | 7303864.076 | 10350817.21 | 11150525.77 | 11197754.77 | 4090096.436 | 9069425.776 | 7322171.138 | 7982010.893 |
| 1008048.946 | 4033605.999 | 2106732.563 | 980230.3742 | 2873191.384 | 2498700.779 | 1149388.618 | 1392776.903 | 2865075.935 | 3738650.769 | 1123160.562 | 3907593.186 | 3855572.25  | 4926003.439 |
| 9955633.956 | 813154.8968 | 2449660.537 | 11986709.45 | 4209251.871 | 3479104.683 | 12145274.11 | 2924668.613 | 4873534.285 | 1213192.963 | 4656022.971 | 4203074.321 | 5130764.1   | 4292102.579 |
| 5626243.148 | 2344584.627 | 1691873.316 | 1885116.554 | 14234253.84 | 1333550.84  | 1579959.365 | 5348598.993 | 1866989.363 | 1783562.207 | 1608466.729 | 3488265.741 | 3943832.764 | 4386591.973 |
| 1334491.467 | 1342143.886 | 4386940.061 | 1509807.917 | 2650811.285 | 2090721.975 | 4727952.321 | 2347499.96  | 8148520.657 | 5173647.531 | 692791.7114 | 4594575.329 | 3754043.122 | 3407000.663 |
| 1048810.857 | 228956.3404 | 370786.5777 | 1137966.656 | 244833.4639 | 474826.1394 | 564802.1608 | 4185040.413 | 195627.8135 | 193196.0645 | 294884.7763 | 1351390.955 | 1245813.171 | 1104546.219 |
| 1262861.433 | 5097934.304 | 3715305.19  | 2558397.083 | 2055126.554 | 3508934.812 | 1923192.095 | 7003424.982 | 17031824.68 | 19016737.89 | 5219427.185 | 7973348.406 | 5452317.859 | 6014225.404 |
| 925140.9489 | 11207122.21 | 2022438.191 | 952023.8096 | 1916505.105 | 1570624.751 | 568660.2427 | 1347982.781 | 5824304.295 | 1657207.198 | 4451361.31  | 2470380.575 | 2276801.276 | 3241574.293 |
| 2518026.826 | 2885144.813 | 3023075.723 | 1365043.396 | 2739039.61  | 8322713.941 | 2426070.656 | 5556849.04  | 5373916.33  | 4453260.606 | 1828510.809 | 4510744.732 | 5213022.888 | 5346264.189 |
| 10022986.34 | 2624183.06  | 6949429.988 | 5050891.286 | 12960314.96 | 13327849.54 | 17928493.23 | 9034165.361 | 1722130.882 | 10325109.79 | 7530935.069 | 5641306.521 | 6650835.017 | 6693911.49  |
| 2231398.201 | 3499932.427 | 3730785.682 | 2393481.252 | 4073323.168 | 1977624.753 | 3045832.157 | 2258141.26  | 3275834.244 | 3775390.642 | 1617289.059 | 4653635.723 | 2489243.165 | 4112202.039 |
| 8257761.223 | 3948637.807 | 8524585.452 | 9116500.629 | 7389735.94  | 14381150.85 | 9352086.853 | 10320336.36 | 7498887.167 | 8251793.89  | 6345480.708 | 9446012.382 | 8476161.302 | 10088606.66 |
| 4734235.145 | 775882.9167 | 860467.719  | 11377008.32 | 6587079.428 | 985232.5981 | 9804605.821 | 772018.0285 | 771037.6838 | 746877.0574 | 4740690.43  | 3688699.524 | 2159560.295 | 2268002.808 |
| 3042072.335 | 6505541.145 | 4127986.304 | 2522950.159 | 5439903.702 | 4857403.056 | 4391906.661 | 4627535.825 | 6347306.71  | 7145916.922 | 3709961.53  | 8986426.051 | 5989721.522 | 4718595.576 |
| 9186145.86  | 3592980.955 | 3717120.277 | 10884851.24 | 8615670.543 | 4172871.76  | 2750953.963 | 1508624.727 | 1750836.685 | 1261925.178 | 3866045.906 | 4132719.69  | 2424079.971 | 3040475.387 |
| 2878294.246 | 8218815.94  | 8392237.469 | 6494384.638 | 5277878.414 | 9127679.437 | 5021321.393 | 2678883.119 | 8507522.715 | 17419286.07 | 4094957.153 | 7910831.085 | 7531105.403 | 6913972.876 |
| 7728491.238 | 1722670.657 | 5156466.337 | 6992321.691 | 8004075.944 | 1051752.447 | 16854181.59 | 460232.016  | 414315.5432 | 846550.7885 | 6451119.753 | 4202800.025 | 3417620.84  | 4429623.089 |
| 4148172.711 | 642950.5632 | 1826138.592 | 5378848.952 | 5781734.363 | 1112648.858 | 16659309.13 | 297392.2239 | 306417.9337 | 232323.4217 | 6791338.902 | 3422939.028 | 3263528.752 | 3217971.681 |
| 8963281.368 | 4713861.934 | 3446917.337 | 10355118.66 | 10247695.57 | 5188181.835 | 15480909.43 | 3262038.409 | 1533311.552 | 2060752.636 | 7015943.229 | 7112831.684 | 5559176.328 | 5631182.567 |

|             |             |             |             |             |             |             |             |             |             |             |             |             |             |
|-------------|-------------|-------------|-------------|-------------|-------------|-------------|-------------|-------------|-------------|-------------|-------------|-------------|-------------|
| 4464341.972 | 5624977.655 | 8540565.564 | 3874432.703 | 6313832.097 | 11133269.49 | 9822908.837 | 8794799.106 | 8092304.393 | 8026046.72  | 6931681.429 | 8881526.594 | 6616064.076 | 6246857.091 |
| 8741435.495 | 3605966.597 | 6747298.295 | 10463801.05 | 8947254.31  | 5661245.221 | 14988299.71 | 3894319.808 | 4313739.974 | 4166320.269 | 10436835.3  | 8526156.497 | 5910231.367 | 5747731.326 |
| 6949500.931 | 2416556.694 | 8818140.599 | 6785779.628 | 4322146.966 | 5683967.485 | 6751143.757 | 4911490.502 | 5522958.96  | 2849857.821 | 1911949.97  | 6320431.159 | 4304562.853 | 3515346.554 |
| 2453265.337 | 7028788.412 | 7080071.612 | 2740630.311 | 7078407.093 | 7248335.292 | 6863202.912 | 8868961.862 | 8640423.159 | 13106240.82 | 4657903.432 | 8783111.01  | 8329862.705 | 8958393.548 |
| 669784.1835 | 5230781.825 | 8845533.184 | 1282300.037 | 3462523.845 | 8102760.84  | 4216412.888 | 10970537.6  | 12161364.49 | 14495146.04 | 1342277.106 | 6846206.292 | 4252371.245 | 6781573.568 |
| 3091398.569 | 1063379.246 | 3285797.433 | 1154488.625 | 1015571.381 | 8089752.561 | 7425831.506 | 13787445.36 | 11382948.01 | 14884950.88 | 4585973.213 | 3583922.911 | 4461674.488 | 4789694.231 |
| 928186.5335 | 762618.3787 | 534719.133  | 1308590.063 | 772316.732  | 630660.521  | 348582.811  | 782144.8891 | 805880.0992 | 929597.8049 | 1029191.156 | 2037553.637 | 1673147.538 | 1296313.431 |
| 799602.5868 | 2648312.951 | 4286527.637 | 1346483.924 | 3028147.648 | 4164419.277 | 2729173.74  | 3676332.904 | 4425650.336 | 9121822.125 | 2045812.648 | 3486854.455 | 4610543.196 | 4072878.242 |
| 7537580.787 | 285908.3177 | 254657.1372 | 888622.7939 | 238030.8727 | 195728.2925 | 197670.2895 | 342868.5644 | 297463.7228 | 280922.1775 | 94650.24164 | 855937.2765 | 529018.4087 | 546172.8258 |
| 648863.6224 | 6836294.502 | 2848362.014 | 2349332.161 | 5176855.88  | 5415440.032 | 2793589.463 | 4186677.938 | 9242422.987 | 4442492.42  | 1650163.807 | 6121097.757 | 3983998.935 | 3499595.132 |
| 2326618.244 | 839238.3018 | 1103880.992 | 8784970.189 | 5126864.545 | 909464.2983 | 4213580.308 | 505203.1485 | 1628388.492 | 314926.7172 | 2664144.646 | 1788946.566 | 1246011.395 | 1659011.949 |
| 6665889.573 | 3885177.967 | 2860379.854 | 6069751.797 | 5624220.842 | 4118915.392 | 13628993.36 | 3065702.747 | 3907613.486 | 5057647.686 | 8351358.2   | 5929341.674 | 4619122.086 | 4458553.918 |
| 4419552.765 | 3911669.678 | 553299.7499 | 1379335.557 | 907426.6142 | 5463831.715 | 5307969.99  | 4532182.639 | 13781831.01 | 13366297.55 | 5636562.966 | 6244380.684 | 5282438.024 | 5144105.915 |
| 4682804.707 | 4927904.046 | 2856410.893 | 2376966.712 | 5642082.374 | 2352472.032 | 3884170.75  | 2408275.5   | 2708005.568 | 3462123.677 | 6755718.01  | 3099243.903 | 3956353.058 | 3437221.589 |
| 5286577.798 | 6469611.854 | 4693608.503 | 2366665.781 | 8298658.005 | 5042948.09  | 3538009.92  | 6470401.575 | 13547825.85 | 5271612.93  | 4369684.215 | 4548075.933 | 5209671.359 | 4792101.646 |
| 1249656.489 | 1140592.3   | 1863354.187 | 1365043.541 | 2999504.263 | 4143296.56  | 3353025.552 | 4493558.184 | 2969924.1   | 1926822.834 | 662836.3204 | 2837437.729 | 2324652.986 | 2353538.033 |
| 3725290.443 | 3974619.992 | 1564344.793 | 3980757.172 | 9022841.141 | 6307855.986 | 5510584.758 | 13149885.15 | 3974819.927 | 6411650.584 | 3691301.464 | 6026913.777 | 5599629.073 | 6296852.886 |
| 641710.6913 | 524811.4653 | 423262.1813 | 646724.8857 | 488978.0584 | 345513.5313 | 986407.8459 | 373155.0195 | 396696.0556 | 352771.6637 | 314546.8202 | 566775.4896 | 490174.1356 | 584911.2314 |
| 2346965.904 | 2701049.129 | 8771497.463 | 5185243.652 | 9222453.66  | 5066643.074 | 4076153.189 | 6302275.535 | 2022132.06  | 8969077.226 | 1534905.729 | 6825422.906 | 4207479.007 | 3996272.383 |
| 700496.3563 | 622402.55   | 3859709.521 | 1163961.531 | 5450708.911 | 1552438.331 | 1581555.192 | 793538.9382 | 601563.179  | 6450975.921 | 700669.47   | 2623692.968 | 2052250.24  | 2065332.608 |
| 4712044.194 | 7392426.352 | 3781309.811 | 3614212.218 | 6355982.665 | 4323888.252 | 2812218.648 | 6303301.283 | 6767840.948 | 6635803.961 | 3751324.042 | 5667565.244 | 5699927.707 | 5140066.799 |
| 4280604.597 | 1215507.733 | 4644977.766 | 4627862.75  | 387791.081  | 3874808.681 | 4258776.745 | 1227943.468 | 3199180.413 | 743699.6821 | 7875056.512 | 6489074.012 | 4570137.185 | 4240601.376 |
| 519061.2511 | 3032375.759 | 1228556.706 | 248323.1435 | 1324927.27  | 5137408.553 | 1080558.279 | 3321529.081 | 1931687.026 | 5818039.743 | 2909201.477 | 3445401.797 | 1974012.737 | 1867219.59  |
| 1881117.58  | 2271965.868 | 1225070.114 | 1031781.997 | 1681377.255 | 1512102.967 | 1251159.093 | 3262327.144 | 6331218.259 | 1726280.728 | 1558065.738 | 3394688.903 | 2447828.653 | 2739827.602 |
| 3282290.836 | 2441093.928 | 1082321.742 | 1154520.832 | 1440670.465 | 2209960.478 | 3155537.933 | 6937437.09  | 2282682.899 | 3773158.506 | 1600066.258 | 3677434.399 | 2903787.281 | 1913826.207 |
| 576077.7816 | 919359.3429 | 5398140.709 | 731658.9684 | 553713.0051 | 671636.7764 | 531724.1778 | 592314.1556 | 1277240.328 | 811325.7842 | 629805.6071 | 581582.2529 | 876635.0612 | 646909.1302 |
| 6167000.307 | 1444035.309 | 3922003.349 | 7111756.234 | 3805701.455 | 2136780.707 | 11482257.14 | 1515418.03  | 1745174.306 | 1750438.275 | 4792043.683 | 3362663.196 | 2664003.368 | 2748925.697 |
| 1777494.138 | 2403396.819 | 1575594.832 | 1324951.956 | 3947694.162 | 10667564.5  | 11476314.16 | 7080141.769 | 1993920.74  | 6628031.454 | 7242233.06  | 3680490.614 | 3166272.763 | 5466805.509 |
| 2455401.165 | 552907.4017 | 796224.8877 | 7233018.782 | 5220561.327 | 850308.4169 | 3254188.458 | 487357.0056 | 480037.491  | 475441.8588 | 2584267.469 | 2029192.067 | 1863535.861 | 1239357.205 |
| 3680234.95  | 5932843.172 | 3420053.614 | 3729347.412 | 5413422.465 | 7117311.544 | 4930155.804 | 10758640.87 | 9825886.681 | 11526270.59 | 4252279.559 | 5071244.385 | 5705867.482 | 3885478.849 |
| 279618.2113 | 877578.1509 | 1108566.935 | 420701.3078 | 3331543.164 | 623234.9097 | 6650803.971 | 2576871.158 | 1067582.012 | 431728.4338 | 557966.5452 | 935240.5182 | 996013.3932 | 1158057.671 |
| 1927989.331 | 3548966.433 | 2883264.351 | 2062984.408 | 4432553.219 | 3586343.163 | 3730989.534 | 4393594.001 | 5926618.291 | 5840814.075 | 2518796.375 | 4251133.56  | 4307000.495 | 4443581.496 |
| 4468282.233 | 2620339.311 | 6370480.616 | 5244210.403 | 3591667.084 | 8587096.734 | 5902976.19  | 10499369.23 | 4154888.412 | 5686929.325 | 4379423.403 | 5692857.034 | 4826850.104 | 8772662.409 |
| 5792764.227 | 5791495.48  | 3313861.681 | 4303416.031 | 4214218.012 | 4160695.146 | 2054814.04  | 5475092.095 | 3878939.144 | 6030516.653 | 3871033.92  | 3370739.712 | 4291331.487 | 3748914.286 |
| 3155986.538 | 1883362.15  | 3560084.393 | 2009915.186 | 2032899.076 | 4251751.005 | 3966098.961 | 7085984.61  | 6522677.028 | 2839662.637 | 2115807.264 | 4397480.77  | 3271909.726 | 4056447.365 |

|             |             |             |             |             |             |             |             |             |             |             |             |             |             |
|-------------|-------------|-------------|-------------|-------------|-------------|-------------|-------------|-------------|-------------|-------------|-------------|-------------|-------------|
| 140677.5725 | 3757802.727 | 2717281.539 | 1056480.79  | 3049764.469 | 923085.449  | 2389550.561 | 2028364.537 | 3655363.273 | 485910.3816 | 1996380.437 | 3872149.547 | 3175365.691 | 3052197.2   |
| 793278.2106 | 337322.09   | 443468.6678 | 172561.7392 | 248013.9578 | 757274.8107 | 198976.9632 | 454722.485  | 990063.1998 | 4453867.48  | 1159182.736 | 1747505.507 | 1444700.966 | 1923173.047 |
| 2417969.523 | 798517.819  | 4034425.942 | 603859.9689 | 747429.8659 | 2522225.728 | 1482652.174 | 2383733.057 | 2143571.826 | 804816.9033 | 418894.2225 | 3437977.241 | 1831525.071 | 2299419.303 |
| 408590.8786 | 576177.0758 | 599932.4436 | 2996255.924 | 7617556.575 | 613999.5757 | 573850.2268 | 641196.3228 | 722730.0941 | 782376.5739 | 385456.5793 | 698526.7037 | 620199.2184 | 604953.4268 |
| 1388674.586 | 2821376.589 | 2174948.004 | 3346056.563 | 4692303.493 | 1591592.769 | 1489363.28  | 3170194.679 | 4370709.07  | 2528713.19  | 1944899.409 | 2678860.079 | 2965648.684 | 3245180.759 |
| 1980705.745 | 6045931.185 | 5611520.737 | 2313429.158 | 4440737.918 | 2799061.883 | 2881032.469 | 2014798.706 | 7058983.839 | 6990284.287 | 4080256.507 | 3540743.712 | 3814805.627 | 3842242.005 |
| 569921.695  | 2898256.009 | 1736210.856 | 689868.755  | 2365835.348 | 2065587.908 | 1604458.33  | 1213833.666 | 6539450.948 | 3678454.71  | 1535448.998 | 2610704.988 | 1361268.617 | 2323852.441 |
| 5246509.063 | 2195040.774 | 1684134.75  | 2636302.826 | 4319513.287 | 2192707.605 | 2953737.971 | 3024066.025 | 2069876.34  | 2349474.247 | 2009329.116 | 2958638.536 | 1649175.151 | 2887046.876 |
| 1297338.623 | 5103150.415 | 3843517.438 | 4144530.133 | 7308525.963 | 4103255.996 | 3238747.186 | 6262525.707 | 5582058.617 | 5975130.12  | 1872044.644 | 4148621.352 | 4402891.072 | 3830829.667 |
| 3990944.817 | 3282156.94  | 2593421.261 | 2443814.578 | 6259995.742 | 4114273.176 | 9507223.234 | 3655287.22  | 571426.4109 | 4613788.186 | 1897899.044 | 2368607.702 | 2444376.038 | 2364838.321 |
| 4047294.082 | 874670.6501 | 2385014.014 | 5550536.046 | 4161166.064 | 1512065.434 | 6292058.283 | 571270.1074 | 980421.5711 | 653707.686  | 6360484.494 | 3449106.12  | 2181383.644 | 1798964.509 |
| 3972178     | 5577078.159 | 3001608.75  | 3819624.38  | 3340163.441 | 4727679.373 | 6142474.432 | 2837281.897 | 3192895.238 | 4457943.746 | 5622276.921 | 2644646.152 | 4103196.664 | 4598368.729 |
| 2552243.448 | 5080541.369 | 4212361.226 | 1173010.109 | 2935458.212 | 5107448.51  | 3515794.795 | 4371514.647 | 7312404.932 | 3974910.746 | 3680251.505 | 4389942.856 | 4070523.838 | 4074014.31  |
| 4711329.043 | 941493.5257 | 2439886.048 | 5793303.891 | 2133897.82  | 3385888.621 | 7004347.629 | 1800289.973 | 1369545.711 | 1847394.487 | 3872958.382 | 2969027.699 | 1811877.952 | 1869234.358 |
| 1362735.266 | 3559875.867 | 2832192.465 | 1739417.439 | 2990978.509 | 3265499.02  | 3048297.392 | 3518083.249 | 3426972.147 | 2880186.423 | 1592548.904 | 3302743.698 | 3214644.577 | 2738111.284 |
| 1110699.553 | 1728755.892 | 2246139.781 | 1313455.405 | 1435449.59  | 2864530.939 | 4368480.573 | 1674996.422 | 2598582.804 | 2495855.884 | 1487869.72  | 2637042.795 | 2098353.146 | 2650716.829 |
| 1427645.585 | 435558.3356 | 1414551.246 | 1117779.668 | 2456501.767 | 2953333.56  | 8887422.808 | 1379947.506 | 259970.6656 | 1423925.869 | 960459.3806 | 1395056.265 | 1167939.583 | 901599.1192 |
| 1678580.123 | 230807.3435 | 2578935.019 | 1116757.08  | 1140301.415 | 2582210.563 | 1632589.555 | 4407659.053 | 2091393.175 | 1121827.051 | 824409.3642 | 1283948.981 | 1078418.477 | 1185229.525 |
| 3529515.429 | 4885792.031 | 3758746.79  | 3142006.962 | 4493680.291 | 3975099.541 | 6257528.149 | 3048964.858 | 5314414.683 | 2957292.786 | 5419075.851 | 4622282.448 | 3760756.189 | 3842013.797 |
| 4635339.036 | 1080724.344 | 2014068.3   | 4359425.017 | 2488904.827 | 3009879.373 | 2914727.001 | 1386734.571 | 1541269.701 | 473647.0978 | 1734676.268 | 3307220.93  | 2307510.524 | 3621848.644 |
| 661303.9608 | 849161.2952 | 876668.8382 | 227915.1257 | 332483.805  | 433395.7163 | 592143.4102 | 797886.5437 | 1304546.749 | 1352816.43  | 475820.9988 | 1527526.328 | 1384813.44  | 1299939.383 |
| 3217108.7   | 695056.8584 | 1279568.453 | 5299806.476 | 3608774.837 | 1203833.436 | 6892844.383 | 384888.2512 | 306456.0617 | 448265.9146 | 3779004.079 | 3054264.409 | 1664644.462 | 1884290.533 |
| 438121.3581 | 1310884.057 | 4180897.167 | 2262451.486 | 4123063.154 | 4425882.357 | 6980647.884 | 6380090.004 | 3867900.781 | 1588213.548 | 1331289.826 | 4354511.195 | 3521643.32  | 4379497.997 |
| 1173962.661 | 1666736.36  | 1496518.64  | 1170416.369 | 1128031.048 | 1254744.904 | 5804789.761 | 1435366.273 | 7908393.838 | 8156204.608 | 1328886.129 | 1753630.443 | 1929417.399 | 2234388.542 |
| 343406.9579 | 273496.1189 | 255302.1833 | 76354.11318 | 114625.0587 | 155355.6468 | 278689.6138 | 311705.3207 | 212141.3385 | 164183.3523 | 126452.7716 | 446660.5818 | 265411.1037 | 251099.6522 |
| 2605230.933 | 768683.4255 | 626458.0788 | 4969050.002 | 400086.8194 | 1410464.728 | 503571.9103 | 939486.2606 | 571133.53   | 353302.1943 | 666646.9562 | 1714497.847 | 1228276.398 | 996487.6557 |
| 992312.3733 | 153645.8119 | 4006271.662 | 913444.346  | 1574409.559 | 3482103.62  | 2998948.105 | 2504243.479 | 2186505.511 | 1596487.434 | 597707.2204 | 1999327     | 1242483.981 | 1018056.035 |
| 2346662.906 | 1571476.451 | 1214524.554 | 726676.4398 | 1164807.092 | 1069758.457 | 1019241.537 | 1491635.156 | 1587110.133 | 1919842.481 | 396123.4639 | 2880646.868 | 1501893.13  | 1748889.334 |
| 4072907.969 | 1018223.694 | 876430.5054 | 1652018.186 | 1022473.012 | 1895707.165 | 1211015.662 | 816993.2339 | 362883.6511 | 403742.9916 | 1304668.224 | 1877166.661 | 1431805.213 | 1299507.062 |
| 2319680.554 | 3075715.683 | 2689705.515 | 2440144.903 | 3177424.319 | 2701813.909 | 1808557.471 | 2382232.511 | 4946289.395 | 4175499.735 | 1525806.363 | 3293577.21  | 3237616.218 | 4643958.989 |
| 3201903.118 | 691971.1355 | 1110904.377 | 4391150.806 | 3291989.741 | 1133892.916 | 5235884.733 | 771771.1177 | 775633.0085 | 517162.4882 | 5031918.788 | 2498461.202 | 1562276.012 | 1818152.908 |
| 1760209.973 | 674441.634  | 983839.0293 | 4658160.019 | 3716067.683 | 984164.0316 | 5224947.459 | 782980.0685 | 704863.6364 | 668507.5225 | 3713338.054 | 950673.6909 | 1018921.508 | 1589246.109 |
| 650230.2515 | 913760.463  | 868113.2461 | 297514.7519 | 260491.8473 | 1780314.256 | 1408282.73  | 677635.35   | 970686.2401 | 310119.9257 | 1046123.14  | 1291678.85  | 1334038.867 | 1602654.189 |
| 143848.6337 | 188417.3147 | 185018.0972 | 85770.40688 | 292383.3884 | 754716.646  | 173721.5808 | 3096996.788 | 230354.9263 | 138996.4235 | 124025.7559 | 324084.1738 | 198854.0808 | 187643.0954 |
| 3617688.783 | 1444426.347 | 1989836.507 | 2303953.942 | 1155089.249 | 2194157.776 | 1014248.155 | 1250371.44  | 2692523.25  | 1608661.066 | 2425337.407 | 1869934.063 | 1912702.106 | 2169278.096 |

|             |             |             |             |             |             |             |             |             |             |             |             |             |             |
|-------------|-------------|-------------|-------------|-------------|-------------|-------------|-------------|-------------|-------------|-------------|-------------|-------------|-------------|
| 1422583.377 | 2572797.48  | 2089257.581 | 1418155.422 | 1851913.597 | 825883.2937 | 1779494.326 | 1484120.285 | 1564241.282 | 1319527.83  | 908666.204  | 2722966.862 | 2243903.987 | 2098044.787 |
| 731507.2493 | 1758722.093 | 1441477.27  | 853465.3397 | 1401155.963 | 1318519.47  | 1677197.69  | 1139202.786 | 2251846.802 | 1494410.419 | 797559.503  | 2193320.576 | 1494125.725 | 1491917.976 |
| 1841076.233 | 1311994.263 | 1293788.129 | 657780.0497 | 1449981.849 | 1096145.853 | 821841.5502 | 1022706.531 | 1580032.549 | 3249243.467 | 1020846.276 | 2457826.834 | 1322495.09  | 2106680.562 |
| 3234655.383 | 613793.576  | 169837.5981 | 761812.1562 | 3590313.194 | 401924.0128 | 360066.2386 | 1343740.615 | 145023.2103 | 303313.5007 | 182346.2548 | 891371.1904 | 693980.3985 | 674524.4177 |
| 621497.2491 | 1011519.732 | 2034597.208 | 2188501.783 | 1954639.527 | 1486350.707 | 2852718.796 | 1006062.737 | 1431404.019 | 1044175.864 | 1533205.106 | 2189660.503 | 1685796.741 | 1719863.904 |
| 474928.7597 | 273843.716  | 368389.8461 | 486672.2274 | 456347.0406 | 398639.6471 | 702861.9799 | 317913.6054 | 398961.5084 | 271073.626  | 537603.3341 | 495836.7766 | 505802.0646 | 443953.6351 |
| 246373.3993 | 423790.6088 | 495248.1698 | 666229.8783 | 146204.0912 | 386890.3175 | 409548.8323 | 188265.8803 | 271892.9094 | 125399.7209 | 77516.62532 | 858996.9756 | 585544.3946 | 484291.6259 |
| 1300266.168 | 3370756.025 | 3348338.957 | 818926.6802 | 2255270.308 | 3882950.94  | 1837685.952 | 3666504.656 | 5444164.162 | 3838089.977 | 1502214.986 | 3029562.103 | 2937673.622 | 3273341.36  |
| 324143.1252 | 560079.7726 | 421965.3303 | 395107.7324 | 1152090.774 | 1730882.307 | 773712.2107 | 1491826.707 | 466752.8168 | 367796.9657 | 160832.0985 | 1688400.011 | 1100310.876 | 1394101.033 |
| 1058701.799 | 1756913.771 | 1667676.301 | 670285.2374 | 3507335.751 | 1352035.91  | 1929695.703 | 1991409.842 | 1965691.716 | 2025350.109 | 1096179.105 | 2879716.352 | 2949454.06  | 2147694.206 |
| 877133.2974 | 2317038.674 | 2260587.421 | 1540519.211 | 3083933.097 | 2174745.864 | 703531.453  | 2957234.808 | 4288204.641 | 3324421.279 | 2010678.533 | 2585948.312 | 2907296.087 | 2976993.202 |
| 708535.2152 | 296962.6604 | 656228.9344 | 336981.9772 | 4019064.096 | 585685.7405 | 564132.7405 | 2557338.496 | 1249929.396 | 255379.7958 | 257333.6545 | 142014.8686 | 134998.8039 | 156711.7336 |
| 492204.1962 | 2731307.711 | 689441.2972 | 584558.4776 | 1486428.834 | 891803.8817 | 1036429.523 | 939740.5798 | 2066958.158 | 1179568.843 | 1098225.759 | 1354433.493 | 1578188.747 | 1747939.213 |
| 2614031.796 | 2803204.712 | 1261968.039 | 1503029.374 | 1451862.035 | 1801485.866 | 1704448.191 | 4702967.878 | 1150249.461 | 622466.7257 | 1182648.379 | 2833050.915 | 1693411.048 | 1914902.273 |
| 1288112.934 | 2610202.052 | 2709269.294 | 1518968.438 | 3623331.535 | 3130514.957 | 1574848.916 | 2380877.599 | 4219259.276 | 3407951.904 | 1531489.861 | 2824768.728 | 2795386.105 | 2326666.561 |
| 915113.4159 | 1133633.484 | 1126298.783 | 572964.4611 | 2544933.62  | 2558324.027 | 375400.8608 | 1905624.761 | 1662729.966 | 2785942.498 | 1093354.111 | 2454932.657 | 1968996.185 | 1450204.836 |
| 2083072.653 | 206067.9383 | 533019.6174 | 1804230.415 | 93053.37592 | 2045003.723 | 460288.7087 | 1098724.724 | 309977.7559 | 150635.6407 | 819087.3507 | 1219883.434 | 961549.5869 | 1085025.244 |
| 2709391.936 | 499597.2198 | 455807.2014 | 415578.1742 | 404060.3943 | 320359.74   | 320613.2698 | 306110.0328 | 535623.7353 | 412383.3831 | 1859911.66  | 428320.4657 | 318679.515  | 320251.0829 |
| 20770.70615 | 15495.97078 | 73424.34501 | 7863.265263 | 19259.09142 | 36469.02597 | 25070.69249 | 330448.6201 | 19357.89754 | 34648.86678 | 10502.76956 | 34597.49498 | 23844.29937 | 22605.72697 |
| 213034.4068 | 102029.6198 | 109452.1312 | 140093.3067 | 211932.5459 | 192842.5304 | 110568.9785 | 93904.81581 | 90973.6936  | 95248.25674 | 90811.36634 | 129766.1884 | 96947.87238 | 90807.85405 |
| 1098154.478 | 1161213.674 | 1572325.234 | 630427.7715 | 888763.595  | 1360357.29  | 999798.5024 | 1747596.579 | 1428551.923 | 1234556.661 | 696969.8899 | 1987714.617 | 1612630.283 | 1301212.899 |
| 641975.7789 | 1646652.391 | 1156777.914 | 597723.614  | 1432640.202 | 1090923.806 | 1154150.8   | 1117161.057 | 1840232.52  | 1731771.72  | 922861.4062 | 1360022.383 | 1103555.934 | 690112.3136 |
| 61000.92231 | 118003.8571 | 846763.0714 | 58867.91558 | 103189.4265 | 282450.3082 | 68178.82522 | 226942.5178 | 85085.30216 | 76480.19113 | 50123.26449 | 148767.1266 | 101865.5497 | 76819.56948 |
| 924250.3734 | 2706629.388 | 2652348.382 | 1452165.025 | 2951347.892 | 2384664.839 | 2428119.917 | 3023244.988 | 2526998.284 | 3139758.002 | 1874611.249 | 2123967.11  | 2307618.153 | 2542574.169 |
| 2347273.126 | 2373895.432 | 2651653.091 | 1494879.603 | 1017016.045 | 2818865.413 | 1456414.4   | 1737090.733 | 1623750.728 | 1999408.153 | 1573637.108 | 1513751.388 | 1648422.862 | 1407497.572 |
| 512411.9063 | 1726435.923 | 2431904.509 | 1240593.769 | 1616800.208 | 1752594.972 | 1153654.438 | 1292187.089 | 1950987.377 | 2123396.196 | 1113392.841 | 1349653.672 | 1818043.657 | 1813867.036 |
| 2128837.481 | 1309816.391 | 1160718.752 | 1058874.928 | 817604.5761 | 866396.1013 | 1139320.481 | 1331246.683 | 977741.1295 | 723710.487  | 1096130.208 | 868958.6965 | 1290601.31  | 1051071.502 |
| 138282.604  | 2331246.007 | 768313.1389 | 486215.5232 | 801141.512  | 238858.7849 | 123753.6406 | 155666.0716 | 177871.308  | 205443.4156 | 92999.22061 | 173909.8273 | 141268.5814 | 171735.3761 |
| 683355.632  | 327459.7029 | 430884.2427 | 1365567.684 | 2817562.528 | 477798.3398 | 840475.6498 | 380158.0562 | 335802.5824 | 324563.52   | 632339.826  | 433889.2346 | 453655.7524 | 570683.7124 |
| 685266.0289 | 691028.734  | 796770.3318 | 543756.7191 | 835582.1718 | 618038.3117 | 343217.8593 | 885027.4104 | 936365.8203 | 1723074.127 | 516830.747  | 459377.5467 | 857759.2765 | 839829.401  |
| 1909163.221 | 2157322.425 | 1519298.201 | 1224540.666 | 1315241.454 | 1177520.291 | 379268.1512 | 1032652.352 | 906959.3049 | 427121.6537 | 1416196.156 | 1060678.546 | 1402054.086 | 1005148.833 |
| 487461.8012 | 1371060.973 | 864497.987  | 677054.9796 | 1617127.735 | 1100546.011 | 1024513.486 | 1474331.113 | 2343637.485 | 1964925.936 | 674789.6733 | 1404112.977 | 1161487.558 | 1223568.936 |
| 1232660.668 | 133883.9005 | 413537.7909 | 1584939.855 | 1167543.119 | 172310.7638 | 2323525.218 | 39974.45346 | 45331.37411 | 42057.13215 | 1577033.348 | 819243.3282 | 633249.6162 | 746109.5577 |
| 1561383.514 | 834677.9818 | 1283663.824 | 386404.4724 | 468726.4876 | 1948622.101 | 1469603.272 | 1081182.05  | 803915.793  | 2863222.189 | 384707.0839 | 1572847.724 | 854652.4642 | 1082657.926 |
| 1156510.982 | 1389645.734 | 1535659.768 | 426219.4571 | 1456526.181 | 2338323.853 | 1375658.025 | 2188565.629 | 1198999.293 | 2744416.494 | 1224340.783 | 865046.6919 | 1513664.96  | 1153701.364 |

|             |             |             |             |             |             |             |             |             |             |             |             |             |             |
|-------------|-------------|-------------|-------------|-------------|-------------|-------------|-------------|-------------|-------------|-------------|-------------|-------------|-------------|
| 939323.3126 | 1188591.173 | 1320807.634 | 1090367.345 | 1049029.063 | 888142.7345 | 1049538.987 | 822542.7173 | 1458757.459 | 1098747.575 | 807227.4124 | 988901.6687 | 913858.2577 | 1092605.852 |
| 1413425.259 | 477040.6624 | 249960.4872 | 145832.866  | 182890.055  | 213634.7368 | 261465.3414 | 173932.3496 | 399910.6495 | 428893.4322 | 497525.7603 | 332622.0204 | 260449.1184 | 268219.0725 |
| 293513.9351 | 335376.6089 | 228554.4476 | 485661.4319 | 850414.5203 | 1349955.827 | 1076256.325 | 1825315.548 | 1235075.254 | 2093010.511 | 419221.7416 | 780639.1384 | 1212598.337 | 716239.4484 |
| 1041053.339 | 242580.4595 | 125933.449  | 242435.2538 | 228722.1954 | 249725.948  | 779657.4431 | 150023.1422 | 99048.57092 | 107063.7338 | 186240.8719 | 149009.3551 | 143499.618  | 147667.7266 |
| 411162.5685 | 337632.7414 | 300987.447  | 402799.9161 | 396707.7777 | 345116.3946 | 528528.3514 | 275229.0147 | 353213.3901 | 234677.9934 | 465422.1569 | 301255.5289 | 585595.5732 | 353757.8323 |
| 202619.3427 | 400402.8772 | 606819.629  | 389925.6915 | 736018.6704 | 601720.5594 | 542716.3043 | 880917.2306 | 674757.9979 | 1002687.998 | 346457.0857 | 604819.9472 | 659685.7553 | 504126.1818 |
| 404013.9368 | 387206.9379 | 429288.7497 | 395796.6808 | 388206.7798 | 339116.0673 | 626062.515  | 270443.7764 | 546194.3687 | 305287.3227 | 676266.1784 | 308668.0427 | 322729.9089 | 347607.2616 |
| 289672.6017 | 869853.4331 | 777420.5304 | 275159.2864 | 494887.9257 | 766257.5415 | 427924.8257 | 725190.1042 | 863760.1595 | 1035987.131 | 288946.1607 | 849949.6136 | 768800.5847 | 866088.4318 |
| 275588.4359 | 284729.2486 | 232817.9941 | 302132.8223 | 239400.6149 | 200160.2    | 208964.0722 | 157483.5445 | 293509.4295 | 407454.8236 | 169348.7054 | 208223.648  | 255568.3375 | 231065.0058 |
| 32402.22372 | 66571.4457  | 46647.87788 | 7270.237307 | 15739.5256  | 36637.34527 | 41692.03672 | 14776.22752 | 28119.26045 | 8657.695296 | 9200.659971 | 80057.28595 | 54441.27812 | 52218.26483 |
| 72745.00009 | 117921.3952 | 111254.5635 | 74005.2632  | 126975.6703 | 141511.138  | 63464.80472 | 179652.7917 | 29655.59871 | 103662.1819 | 73933.82175 | 188768.9351 | 155066.154  | 162825.7229 |
| 49494.48803 | 86377.73475 | 72744.69411 | 66687.92398 | 125268.7139 | 88753.85799 | 92828.03261 | 124705.3588 | 134941.7928 | 91500.32132 | 52933.09594 | 113286.7851 | 112959.5192 | 120196.6156 |
| 38727.96647 | 120335.6244 | 59599.3077  | 24276.79122 | 102432.3186 | 59541.58936 | 64241.81515 | 63038.67667 | 46311.11902 | 77800.62944 | 21221.75607 | 86213.72474 | 57172.05617 | 58742.71025 |
| 2918621644  | 1635091121  | 1973783741  | 3115409113  | 3334287769  | 1617973436  | 7180190995  | 1756933269  | 1226033059  | 908267150.4 | 4126936863  | 4122364517  | 2409935750  | 2763602571  |
| 982661793.8 | 158987448.7 | 1990725403  | 1621387989  | 2085096990  | 1451660647  | 3959499115  | 1428203274  | 2025032950  | 1798014030  | 172948922.5 | 1542531495  | 1877528000  | 1980429973  |
| 489626327.2 | 107018583.2 | 131876994.5 | 348890438.4 | 86156996.38 | 176039322.9 | 237289460.9 | 62726429.92 | 45861224.08 | 29455917.2  | 508183917.1 | 156052902   | 206166862.4 | 246541701   |
| 162614533.4 | 106289224   | 128894412.8 | 233622050.4 | 638167372.4 | 268064504.5 | 123378375.2 | 175969808.7 | 151441351.5 | 119258479.5 | 110293508.5 | 259202537   | 191392870.7 | 225912807.4 |
| 419735965.2 | 132592820.1 | 190717851.6 | 325208913.9 | 127451231.8 | 259978732.2 | 508911165.6 | 139295485.4 | 52550672.22 | 63258175.83 | 377199849   | 173316327.5 | 218228689   | 281503211.4 |
| 159336656.5 | 233412955.8 | 272496195.6 | 79565909.12 | 107345449   | 148698082.8 | 196484740   | 82481719.16 | 457207699.2 | 195640724.4 | 421478015.4 | 209513685.6 | 187301673.8 | 192532204.9 |
| 336464845.4 | 100968994.9 | 108090637.1 | 102273609.3 | 48626674.62 | 180460429.8 | 425648019.2 | 72994390.83 | 20408190.77 | 9691293.382 | 186605871.3 | 132256546.5 | 140300530.1 | 159573612.3 |
| 164729049.4 | 373642834.5 | 258472047.6 | 143644344   | 243337287.9 | 63156384.39 | 220762200.3 | 105559665.3 | 378592960.6 | 130292384.3 | 246391434.9 | 274890411.7 | 273120727.4 | 351756739.8 |
| 120421849.1 | 171634204.5 | 96376566.16 | 69781820.24 | 91364633.68 | 123317516.2 | 129908320.6 | 132983400.1 | 34865817.2  | 138726922.8 | 161874127.1 | 148201135.6 | 84590195.97 | 181102552.5 |
| 18818938.37 | 44564215.86 | 47898016.08 | 25359910.27 | 59707446.39 | 31617796.33 | 46692380.6  | 24160698.08 | 56590434.89 | 40607751.17 | 31755020.3  | 65708614.92 | 57512320.68 | 60433200.27 |
| 15394472.76 | 208516969.9 | 32648928.2  | 77160288.6  | 83314107.98 | 287963157.6 | 186032109.9 | 215095793.4 | 329411089.6 | 464754835.6 | 308100432.6 | 167754660.1 | 228437032   | 227707233.9 |
| 12760678.33 | 32208475.47 | 36418875.37 | 19535714.91 | 49692098.59 | 24032274.65 | 39354186.51 | 16044590.88 | 44814034.18 | 29155101.24 | 25952155.96 | 51082417.96 | 48135418.49 | 47412249.47 |
| 14859141.63 | 279206647.3 | 49071073.78 | 13175164.24 | 87248406.9  | 13108811.51 | 27057319.01 | 14622602.84 | 20224334.16 | 29227403.08 | 10472418.54 | 39451901.22 | 29655714.84 | 46426216.59 |
| 117318599.6 | 172019161.4 | 74997846.87 | 107503718.8 | 135772879.6 | 117044479   | 70082863.18 | 158636956.8 | 88057563.66 | 155098046.5 | 54071134.22 | 159570216.3 | 129329898.6 | 142276057.7 |
| 31187632.7  | 82747439.13 | 96022665    | 32313816.77 | 75418332.88 | 80930542.38 | 49711127.06 | 99653515.57 | 163599422.6 | 105966615.3 | 54900859.15 | 92493567.79 | 89305965.32 | 101132403.1 |
| 20914299.53 | 44243292.93 | 63730657.38 | 21977475.02 | 59443587.79 | 22430579.95 | 48913556.76 | 21336221.75 | 89861911.35 | 50400558.16 | 36551797.53 | 57346883.8  | 51803687.23 | 56982328.71 |
| 83327299.36 | 135899625.5 | 34115133.26 | 115832680.2 | 63075618.98 | 25284807.63 | 73348975.63 | 22775772.45 | 29605131.4  | 32176919.78 | 228921110.5 | 34136801.01 | 36589414.45 | 42588470.74 |
| 41816809.66 | 59358448.54 | 152203169   | 32960096.26 | 35532414.13 | 90697624.9  | 42865040.49 | 36675376.17 | 210449791.8 | 135217494.4 | 227579797.4 | 84368707.41 | 92388895.66 | 100662935.1 |
| 9255126.815 | 39464172.61 | 29667634.05 | 26900083.07 | 33080964.8  | 71474322.17 | 42396204.52 | 77525367.29 | 24923193.7  | 18636737.41 | 14599788.82 | 53220980.01 | 57405317.21 | 56201100.87 |
| 103035821.8 | 101503532.5 | 80747715.97 | 45990346.68 | 74137373.96 | 67308163.03 | 109795168.9 | 64154456.88 | 82166947.33 | 97361378.27 | 92396913.29 | 116716064.1 | 88856660.71 | 91935574.71 |
| 146934300.8 | 49746475.59 | 69933717.06 | 128864477.7 | 42475212.55 | 116331659.6 | 123031738.7 | 48741981    | 28491682.87 | 29670719.26 | 97151297.36 | 78789159.93 | 103705336.3 | 107239714.4 |
| 3889453.507 | 4043386.406 | 5887568.459 | 3203990.118 | 18632937.36 | 27117476.11 | 1403923.027 | 42519505.48 | 1200154.815 | 2563711.964 | 813898.9665 | 3249455.63  | 1902898.4   | 1775449.642 |

|             |             |             |             |             |             |             |             |             |             |             |             |             |             |
|-------------|-------------|-------------|-------------|-------------|-------------|-------------|-------------|-------------|-------------|-------------|-------------|-------------|-------------|
| 40742388.28 | 95702765.93 | 64896899.23 | 35050140.7  | 98373055.77 | 65411434.7  | 54678902.06 | 90084256.72 | 118721489.6 | 131313547.1 | 45605771.84 | 96419174.13 | 84713454.44 | 90717787.89 |
| 125364573.8 | 120972540.6 | 97601687.92 | 153585650.4 | 112909007.6 | 116930849.3 | 129770472.4 | 128261073.1 | 255337965.3 | 149071140.6 | 103253795   | 105364426   | 101008800   | 102756857.1 |
| 126900651.4 | 37865812.98 | 22612570.76 | 10255801.45 | 12150598.31 | 6858415.558 | 25195900.74 | 10263694.53 | 30587480.86 | 11138173.13 | 14273568.08 | 47837034.14 | 31407080.58 | 29661859.79 |
| 65106460.93 | 140378435.5 | 111949362.7 | 69208222.67 | 134782804   | 98786563.12 | 125703129.1 | 138974388.4 | 87593544.44 | 160013467.4 | 49878705.67 | 102841162.2 | 121338047.8 | 130758615.7 |
| 18303217.62 | 72550515.92 | 82912019.62 | 15843975.18 | 16701220.23 | 11476713.69 | 48673833.74 | 3956847.234 | 171929054.5 | 89618354.5  | 97761665.72 | 57479543.67 | 40582284.87 | 45301834.4  |
| 88038210.84 | 60132377.67 | 52615102.44 | 36556008.08 | 45767184.6  | 43926784.25 | 89521216.95 | 33558044.24 | 54829741.69 | 37549115.94 | 78029413.8  | 57186977.63 | 61043991.92 | 55280761.22 |
| 56180824.69 | 52433366.72 | 35984748.43 | 33051355.57 | 112738245.5 | 40468760.26 | 31278220.01 | 63692615.23 | 58083994.24 | 72437442.64 | 40266457.22 | 57289717.77 | 53607241.09 | 60839340.55 |
| 43398748.35 | 84723495.6  | 72577076.17 | 89078786.03 | 75195244.55 | 96550213.15 | 53755623.12 | 100851992.9 | 84612638.49 | 93326950.72 | 72209302.92 | 46244319.57 | 70477142.8  | 78882779.26 |
| 13429778.89 | 83987571.33 | 30461435.88 | 34269127.69 | 73442902.99 | 22646272.9  | 15447560.77 | 36761487.96 | 22380561.87 | 33341709.1  | 17393796.74 | 33368927.21 | 44831205.91 | 36393761.91 |
| 17484040.92 | 45800769.52 | 66099763.41 | 33685573.21 | 64444345.59 | 68778454.1  | 40268108.72 | 69523983.31 | 72099707.81 | 79292211.12 | 29525682.11 | 49373492.95 | 60655537.98 | 40476769.21 |
| 19538318.28 | 18928369.62 | 20377300.57 | 6318453.438 | 6888026.757 | 12914857.56 | 7722718.851 | 7844169.171 | 8300801.712 | 16346420.04 | 16409796.34 | 42848339.96 | 25174328.07 | 25128003.12 |
| 30644415.41 | 73507329.13 | 51626660.39 | 13228537.97 | 17435295.47 | 45226385.01 | 51837133.12 | 79338998.42 | 80010624.05 | 71687387.72 | 34665447    | 36137432.12 | 68139988.77 | 70953166.63 |
| 63529643.45 | 25205814.2  | 26942516.67 | 24423970.18 | 26494213.19 | 51273063.89 | 90798554.8  | 20386815.88 | 30164605.52 | 20199412.29 | 37242382.68 | 23925209.52 | 34489523.21 | 44262286.55 |
| 63226464.34 | 4309882.895 | 5820088.968 | 4710240.831 | 6205324.213 | 4070908.985 | 3556016.608 | 4438438.222 | 4625229.854 | 5763424.906 | 2911443.651 | 11664481.76 | 8908827.756 | 8657563.943 |
| 58587158.46 | 62813714.25 | 63824323.18 | 72039827.82 | 53212354.88 | 53318138.58 | 41454405.45 | 50493065.03 | 65324894.83 | 73415172.34 | 51420158.23 | 44712495.71 | 55944965.68 | 52162184    |
| 20748958.35 | 27646882.38 | 11528054.57 | 4218873.411 | 10574588.89 | 27898654.42 | 14512742.01 | 18454988.73 | 15683220.08 | 17245082    | 20644258.27 | 30683733.14 | 23164919.55 | 23427083.94 |
| 9247069.543 | 60805558.65 | 33353707.55 | 21706439.56 | 63308348.76 | 44849038.87 | 43292593.79 | 26048690.56 | 57066063.21 | 38417682.9  | 27784715.28 | 44643679.12 | 37639245.42 | 36561474.06 |
| 13570063.74 | 18340907.01 | 16583425.04 | 7330484.867 | 5628864.513 | 10741065.38 | 9759939.358 | 7873383.353 | 17844335.19 | 29195616.68 | 26108827.85 | 25907955.53 | 14553453.41 | 15213270.54 |
| 20348481.82 | 21554418.21 | 28126522.06 | 26032592.62 | 20952895.84 | 13594355.56 | 97939872.87 | 16169005.98 | 20159196.77 | 15980438.27 | 47012687.74 | 28552383.66 | 25513841.03 | 29018839.27 |
| 18801825.71 | 55525682.22 | 13996879.26 | 28161626.71 | 27992246.16 | 61472612.79 | 40724182.26 | 12911038.28 | 67564243.61 | 21509728.35 | 48056025.06 | 25533155.25 | 26770724.54 | 32232456.27 |
| 4627692.308 | 13654972.47 | 14527595.01 | 35185729.91 | 68413500.54 | 14581680.93 | 10772609.22 | 14822963.64 | 14545867.6  | 13328141.16 | 7453308.584 | 18425218.1  | 18147194.78 | 20935283.39 |
| 9256772.86  | 25960416.04 | 28599513.6  | 10103810.28 | 24394290.19 | 26715069.67 | 21966695.62 | 21149989.34 | 37477570.24 | 34969934.36 | 14397555.56 | 33494942.08 | 26440160.34 | 25763953.87 |
| 2501149.361 | 5107925.589 | 3518999.467 | 3714262.348 | 8059289.528 | 5761286.678 | 5275425.472 | 5465678.62  | 9289004.762 | 6985727.028 | 5291199.937 | 13902730.1  | 11069472.41 | 10867309.44 |
| 9692282.038 | 36568283.96 | 21530701.63 | 6851881.075 | 13070432.01 | 7417109.203 | 11400547.6  | 7492552.289 | 31202788.05 | 27309482.24 | 17363601.38 | 18134214.09 | 19053757.29 | 19498253.92 |
| 5949220.71  | 43265627.42 | 26046102.76 | 14922020.41 | 16407501.55 | 27884223.67 | 17817172.43 | 26730519.51 | 4389615.015 | 24912223.35 | 11553891.23 | 19009913.67 | 20057494.7  | 17489517.58 |
| 41104926.17 | 22168292.19 | 18750921.65 | 20837374.87 | 20818089.88 | 16108196.43 | 14587628.78 | 23666085.46 | 23101999.48 | 25678199.7  | 26688551.8  | 35337409.54 | 25345033.03 | 25307138.98 |
| 1395311.108 | 27089941.96 | 20189049.26 | 2109844.119 | 320146.7699 | 1497018.669 | 2469095.909 | 445047.6561 | 61896176.8  | 27497562.28 | 50085638    | 16522157.27 | 13627996.3  | 12650840.29 |
| 3401002.203 | 15545095.5  | 10480576.12 | 2104706.383 | 3053708.827 | 3669521.738 | 8433942.534 | 1675307.216 | 8026948.257 | 3606458.013 | 14593237.93 | 10635554.31 | 10641612.3  | 11875844.55 |
| 23268142.31 | 31275144.28 | 59810057.98 | 23002356.36 | 51509177.22 | 59914907.69 | 37854605.95 | 61632563.69 | 23552363.9  | 53099045.35 | 24352925.68 | 38204019.36 | 27557592.8  | 41725203.01 |
| 15505459.4  | 30614671.62 | 30937542.45 | 12703619.99 | 24753363.94 | 31596283.3  | 20892705.58 | 42119961.29 | 43548506.98 | 43609622.86 | 17708663.09 | 27979070.32 | 28843790.76 | 31658242.87 |
| 8812699.856 | 16293032.35 | 8694544.169 | 5088845.701 | 4141388.624 | 12564446.41 | 10377640.08 | 8548063.598 | 12071188.67 | 7241212.406 | 4313716.663 | 14600379.2  | 17671030.64 | 11931814.07 |
| 14653996.58 | 20567850.23 | 11262101.23 | 7728819.148 | 22247124.56 | 16531445.5  | 13509640.02 | 20576705.13 | 31216865.42 | 29803742.43 | 14586406.15 | 33736086.68 | 22493663.5  | 23539642.03 |
| 21168901.31 | 17481947.81 | 26110191.43 | 13093624.34 | 15129481.81 | 35256341.59 | 16730374.1  | 16896944.25 | 21474699.3  | 56375269.09 | 40134167.3  | 23322612.24 | 22464094.12 | 22878332.43 |
| 16355998.22 | 30628514.84 | 24137253.04 | 12887584.87 | 26478009.74 | 16257722.32 | 35500251.43 | 7654481.21  | 21269089.95 | 22539854.39 | 36996506.9  | 18319983.74 | 17881791.19 | 21730644.14 |
| 15266135.07 | 14681761.75 | 24599046.91 | 11375598.85 | 15507464.75 | 27396207.69 | 20757163.01 | 18500797.78 | 28494064.56 | 47447511.58 | 26177028.97 | 20057108.92 | 27048505.3  | 28454303.19 |

|             |             |             |             |             |             |             |             |             |             |             |             |             |             |
|-------------|-------------|-------------|-------------|-------------|-------------|-------------|-------------|-------------|-------------|-------------|-------------|-------------|-------------|
| 10520102.26 | 21653454.48 | 15900550.36 | 6307469.745 | 16030345.79 | 13579763.47 | 10381277.86 | 14385738.03 | 19637147.89 | 27150947.54 | 16652570.96 | 27750267.93 | 27157495.5  | 20253502.07 |
| 9701842.008 | 8524344.329 | 5622528.753 | 2719337.658 | 13522653.96 | 4033149.692 | 11051947.96 | 1874042.094 | 11705399.56 | 9190434.591 | 18824160.25 | 6973107.254 | 9403952.442 | 5964397.916 |
| 26040301.59 | 9402762.423 | 13221747.13 | 17438514.57 | 21231837.59 | 8637013.322 | 31488905.9  | 7704688.876 | 4430820.582 | 4161071.601 | 29376598.15 | 19844741.68 | 13148005.58 | 14457570.34 |
| 9248523.669 | 10831784.48 | 13802408.84 | 3789240.96  | 7409204.051 | 15944917.96 | 5891423.306 | 10685252.52 | 9534808.403 | 20832309.9  | 5049910.233 | 15828406.99 | 12207590.16 | 10695073.26 |
| 17695954.94 | 26358890.57 | 27290498.63 | 21076661.6  | 18971579.27 | 15491542.22 | 20445796.51 | 15241915.27 | 35869785.05 | 24380476.2  | 15751825.68 | 17896446.83 | 13889419.13 | 18717184.09 |
| 5641854.133 | 16502518.07 | 14897322.54 | 6947606.651 | 9122008.778 | 5937324.911 | 14186238.62 | 3185024.546 | 16990009.73 | 17170576.82 | 14849861.48 | 14780946.47 | 11132686.08 | 10898633.96 |
| 18334642.06 | 3789689.694 | 13643042.23 | 6173147.057 | 1378279.319 | 9984191.916 | 3443579.377 | 5668892.509 | 9446243.974 | 10913254.76 | 7460894.803 | 11640391.04 | 10883222.94 | 8678369.913 |
| 5954176.379 | 14785006.97 | 6355193.239 | 3626109.017 | 7373677.072 | 3798519.087 | 5345601.21  | 5359669.782 | 9389760.455 | 14101180.3  | 8250680.894 | 14053334.09 | 8467341.01  | 8950011.636 |
| 19862297.36 | 8153691.461 | 13213141.86 | 13268516.91 | 19663529.66 | 6933955.431 | 16648263.93 | 5980316.752 | 5727612.573 | 11343760.37 | 14947907.43 | 20005081.52 | 12461476.71 | 14122916.43 |
| 3573969.825 | 4564492.295 | 27491739.89 | 1915438.482 | 3633608.474 | 14336069.83 | 4132528.861 | 21004563.54 | 8355507.207 | 3807965.483 | 3550371.805 | 7844255.007 | 8441469.058 | 8662399.153 |
| 8474461.771 | 6663986.998 | 10979672.03 | 8092862.975 | 4053492.677 | 11429406.72 | 21862576.81 | 7686604.689 | 4837708.402 | 4717768.297 | 6374522.206 | 16707213.06 | 9420343.803 | 9131120.701 |
| 16662858.25 | 3542291.155 | 3762669.06  | 15132697.27 | 8612570.564 | 4100990.674 | 8741164.062 | 2134753.837 | 1372274.901 | 1702898.639 | 8933091.623 | 6547797.059 | 5688450.292 | 5223157.58  |
| 8025588.712 | 11273543.97 | 10273385.84 | 4983486.837 | 13590240.57 | 11040607.53 | 10287996.91 | 12191550.69 | 15577665.73 | 15875475.42 | 9041893.056 | 14349448.15 | 10946569.44 | 11625187.46 |
| 3108878.735 | 3681281.67  | 5341663.535 | 3772379.982 | 3996139.42  | 15757555.18 | 15533486.01 | 27237206.89 | 19845383.61 | 22722346.19 | 10436124.2  | 7434978.92  | 7977989.926 | 8346729.47  |
| 3212802.887 | 7218430.899 | 6670748.103 | 2468255.32  | 7213244.645 | 11630442.28 | 7315883.054 | 8918813.307 | 12427574.91 | 11204718.4  | 5274427.438 | 6606188.781 | 8004360.92  | 9644865.788 |
| 3933042.081 | 6272382.097 | 3353188.723 | 975117.7329 | 2328014.069 | 4478085.083 | 2086059.515 | 3783922.757 | 3754562.056 | 3218247.321 | 2640802.345 | 8040148.744 | 7553209.456 | 7830598.414 |
| 5074427.452 | 8992859.506 | 6511646.447 | 6211859.286 | 8979371.233 | 9228330.133 | 5289665.606 | 15480962.65 | 15997419.44 | 13997524.07 | 4760177.845 | 10586039.83 | 9794816.819 | 7319803.67  |
| 4726953.605 | 10426223.5  | 9916752.216 | 5581033.575 | 10344970.11 | 7588602.914 | 6571629.793 | 1467936.051 | 10581583.36 | 11134365.21 | 5073511.168 | 10396247.4  | 8966064.699 | 8448342.689 |
| 9606389.027 | 3080730.052 | 2981242.118 | 2333549.326 | 1582659.695 | 3049143.013 | 2119615.836 | 4257004.216 | 2228322.735 | 2349184.049 | 1587509.577 | 4385600.126 | 3331329.729 | 5856809.163 |
| 1671309.761 | 6938962.671 | 13338516.88 | 6386006.822 | 12665265.89 | 11842721.54 | 4016026.406 | 5415043.723 | 13202254.53 | 10718030.38 | 2790295.856 | 8400465.878 | 8248990.015 | 8501038.945 |
| 3105298.875 | 6360851.085 | 7364231.46  | 4701098.305 | 6897971.431 | 6862287.269 | 6771541.617 | 10945156.23 | 9709655.701 | 9018789.734 | 4387321.738 | 8575983.399 | 8034551.169 | 7383481.855 |
| 6827421.229 | 4072623.303 | 4920452.639 | 735014.6226 | 5210515.488 | 6848767.253 | 6580552.02  | 8413366.699 | 5573153.187 | 6226338.624 | 3224643.614 | 5007674.765 | 6471420.998 | 8234602.32  |
| 1969095.945 | 6401400.571 | 5578490.526 | 2638204.785 | 3000734.021 | 6432706.787 | 4401547.531 | 6404103.276 | 5023527.635 | 10330327.94 | 2964412.817 | 7438323.298 | 6609120.3   | 7317789.558 |
| 1231008.198 | 649767.2062 | 1492795.645 | 982840.9407 | 761659.5684 | 1807584.581 | 1711026.5   | 1030019.348 | 2026976.894 | 400075.6099 | 839718.6606 | 840585.3761 | 713812.0133 | 675874.4052 |
| 1332814.59  | 3445676.303 | 3291400.067 | 545065.6699 | 799397.2471 | 3987588.571 | 2254649.927 | 4095336.335 | 2333204.99  | 1045856.604 | 1311567.907 | 4847478.504 | 3777425.603 | 2955904.449 |
| 1966674.032 | 3951343.096 | 2110274.984 | 2197888.826 | 4291005.56  | 4132434.976 | 3848446.603 | 5418875.435 | 4659924.59  | 5601249.362 | 2573278.044 | 4861064.352 | 3980991.696 | 5337869.28  |
| 1138728.62  | 5152777.315 | 4336548.094 | 2258968.291 | 5653445.843 | 3381577.986 | 3498511.056 | 4671290.199 | 5279513.408 | 5620257.543 | 1888573.686 | 3849363.089 | 4712305.926 | 3879528.895 |
| 1502523.883 | 3054400.861 | 4191235.485 | 2125326.518 | 4171406.177 | 2768250.349 | 3051045.531 | 4124829.311 | 4405047.411 | 3953497.732 | 3228918.754 | 3189943.697 | 3510080.327 | 3376878.845 |
| 1024866.349 | 3971179.863 | 4769600.032 | 2202150.083 | 2288222.74  | 2529102.593 | 1796747.051 | 2750023.818 | 7062024.15  | 7410660.89  | 1673367.392 | 4071075.314 | 3527335.928 | 5485363.837 |
