# Supplementary material for: High-fat diet alters the radiation tolerance of female mice and the modulatory effect of melatonin
Source: Royal Society of Chemistry journal article supplement (doi:10.1039/d3fo01831h), 2023-01-01
Supplement: d3fo01831h3.pdf [file d3fo01831h3.pdf]

| ID           | Name                                   | Formula  | Molecular Weight | RT [min] | m/z     | mzCloud_Resul | mzVault_Resul | MassList_Resu | pos_L_C1    | pos_L_C2    | pos_L_C3    |
|--------------|----------------------------------------|----------|------------------|----------|---------|---------------|---------------|---------------|-------------|-------------|-------------|
| Com_28_pos   | Nicotinic acid                         | C6 H5 N  | 123.032          | 1.916    | 124.039 | Full match    | Full match    | Full match    | 4806297968  | 5552722446  | 7662074549  |
| Com_41_pos   | Hexadecanamide                         | C16 H33  | 255.256          | 9.673    | 256.263 | Full match    | Full match    | No results    | 4189155581  | 2461378563  | 1761720448  |
| Com_43_pos   | L-(-)-Methionine                       | C5 H11 N | 149.051          | 1.9      | 150.058 | Full match    | Full match    | Full match    | 3703440067  | 2646331667  | 2477933392  |
| Com_67_pos   | L-(+)-Citrulline                       | C6 H13 N | 175.096          | 1.308    | 176.103 | Full match    | Full match    | Full match    | 1433216999  | 825419844.2 | 1063994845  |
| Com_68_pos   | Choline                                | C5 H13 N | 103.1            | 1.261    | 104.107 | Full match    | Full match    | No results    | 3179037448  | 3206793598  | 2534464941  |
| Com_69_pos   | Indole-3-acrylamide                    | C11 H9 N | 187.063          | 5.164    | 188.07  | Full match    | Full match    | Full match    | 1883271896  | 1801584646  | 1610279970  |
| Com_79_pos   | D-(+)-Proline                          | C5 H9 N  | 115.063          | 1.395    | 116.071 | Full match    | Full match    | Full match    | 2118898703  | 2263030286  | 2941409499  |
| Com_84_pos   | Acetophenone                           | C8 H8 O  | 120.058          | 2.575    | 121.065 | Full match    | Full match    | No results    | 164884488.7 | 311856213.5 | 170872963.7 |
| Com_95_pos   | L-Pyroglutamic acid                    | C5 H7 N  | 129.043          | 1.294    | 130.05  | Full match    | Full match    | Full match    | 1151058562  | 877478931   | 567019825.6 |
| Com_115_pos  | Valine                                 | C5 H11 N | 117.079          | 1.697    | 118.086 | Full match    | Full match    | Full match    | 1096743946  | 953491164.7 | 716999161.3 |
| Com_166_pos  | Glycitein                              | C16 H12  | 284.068          | 5.814    | 285.075 | Full match    | Full match    | No results    | 226969450.8 | 379102494.9 | 60118713.8  |
| Com_181_pos  | Isoferulic acid                        | C10 H10  | 194.058          | 5.554    | 195.065 | Full match    | Full match    | Full match    | 1167721704  | 1276114534  | 1025428831  |
| Com_182_pos  | DL-Lysine                              | C6 H14 N | 146.106          | 1.137    | 147.113 | Full match    | Full match    | Full match    | 766028214.8 | 183151254.2 | 853936597.7 |
| Com_207_pos  | Acetylcholine                          | C7 H15 N | 145.11           | 1.349    | 146.117 | Full match    | Full match    | No results    | 254287166.8 | 166012045   | 278500325.1 |
| Com_242_pos  | L-Threonine                            | C4 H9 N  | 119.058          | 1.291    | 120.066 | Full match    | Full match    | Full match    | 691901334.3 | 396715155.5 | 317048430   |
| Com_258_pos  | Urocanic acid                          | C6 H6 N2 | 138.043          | 1.429    | 139.05  | Full match    | Full match    | Full match    | 803680023.4 | 558899119.6 | 744240960.3 |
| Com_265_pos  | Betaine                                | C5 H11 N | 117.079          | 1.327    | 118.086 | Full match    | Full match    | Full match    | 302101398.7 | 411324522.2 | 1240062103  |
| Com_266_pos  | 4-Methoxybenzyl alcohol                | C8 H8 O2 | 136.052          | 5.74     | 137.06  | Full match    | Full match    | Full match    | 50834167.86 | 60156316.07 | 39575281.1  |
| Com_280_pos  | Acetanilide                            | C8 H9 N  | 135.068          | 2.341    | 136.076 | Full match    | Full match    | No results    | 561349077.1 | 449911322.5 | 352591954.6 |
| Com_383_pos  | oleoyl ethanolamide                    | C20 H39  | 325.297          | 9.802    | 326.305 | Full match    | Full match    | No results    | 558008093.8 | 309475930.3 | 366816852.6 |
| Com_384_pos  | DL-Stachydrin                          | C7 H13 N | 143.095          | 1.419    | 144.102 | Full match    | Full match    | No results    | 81871421.44 | 159421235.5 | 100888507.1 |
| Com_412_pos  | 7-Methylguanidino                      | C6 H7 N5 | 165.065          | 2.093    | 166.072 | Full match    | Full match    | Full match    | 120398736.5 | 117970102.6 | 146187141.3 |
| Com_434_pos  | Thiamine                               | C12 H16  | 264.105          | 1.31     | 265.112 | Full match    | Full match    | No results    | 485354509.6 | 253489237.8 | 160048182.4 |
| Com_463_pos  | Cytosine                               | C4 H5 N3 | 111.043          | 1.31     | 112.051 | Full match    | Full match    | Full match    | 156865494.9 | 223535096.7 | 134080794.5 |
| Com_492_pos  | N-Benzylformamide                      | C8 H9 N  | 135.068          | 2.177    | 136.076 | Full match    | Full match    | No results    | 276941332.3 | 222266187.3 | 257940985.1 |
| Com_505_pos  | Carvone                                | C10 H14  | 150.104          | 6.77     | 151.112 | Full match    | Full match    | No results    | 120541432   | 94923623.8  | 186420100.9 |
| Com_573_pos  | (R)-Equol                              | C15 H14  | 242.094          | 5.91     | 243.101 | Full match    | Full match    | Full match    | 328103279.5 | 457315785.6 | 458826235.7 |
| Com_584_pos  | D-Alanyl-D-alanine                     | C6 H12 N | 160.085          | 1.368    | 161.092 | Full match    | Full match    | Full match    | 72305327.62 | 72049883.26 | 58485290.98 |
| Com_590_pos  | 2,4-Dimethylthiazole                   | C9 H10 S | 134.073          | 6.412    | 135.08  | Full match    | Full match    | No results    | 339180387.6 | 443962107   | 495721582.8 |
| Com_640_pos  | DL-Carnitine                           | C7 H15 N | 161.105          | 1.312    | 162.113 | Full match    | Full match    | Full match    | 307349453.9 | 190289217   | 192838420.1 |
| Com_677_pos  | Creatinine                             | C4 H7 N3 | 113.059          | 1.318    | 114.066 | Full match    | Full match    | Full match    | 285034019.7 | 175698117.1 | 162209596   |
| Com_705_pos  | L-Alanyl-L-proline                     | C8 H14 N | 186.101          | 1.454    | 187.108 | Full match    | Full match    | No results    | 273305050.8 | 232505356.5 | 117452450.5 |
| Com_742_pos  | Caffeine                               | C8 H10 N | 194.08           | 5.361    | 195.088 | Full match    | Full match    | No results    | 4841564.311 | 341820365.1 | 6753643.923 |
| Com_817_pos  | Indole                                 | C8 H7 N  | 117.058          | 6.05     | 118.065 | Full match    | Full match    | No results    | 182143092.2 | 216113382.3 | 122793999.8 |
| Com_845_pos  | 8-Hydroxyquinoline                     | C9 H7 N  | 145.053          | 5.658    | 146.06  | Full match    | Full match    | No results    | 134100329.7 | 168911610.5 | 353799409.7 |
| Com_852_pos  | Glycylproline                          | C7 H12 N | 172.085          | 1.427    | 173.092 | Full match    | Full match    | Full match    | 226235283.6 | 285116574.2 | 189348132.9 |
| Com_1091_pos | D-Serine                               | C3 H7 N  | 105.043          | 1.267    | 106.05  | Full match    | Full match    | Full match    | 162942964.2 | 104519612.9 | 63688749.58 |
| Com_1137_pos | L-L-Glutamyl-L-proline                 | C10 H16  | 276.096          | 1.418    | 277.104 | Full match    | Full match    | Full match    | 97972172.64 | 70597847.14 | 55349196.75 |
| Com_1143_pos | 2-Amino-1,3,4-triazole                 | C3 H3 N3 | 117.058          | 6.885    | 318.299 | Full match    | Full match    | No results    | 39217568.11 | 20387936.2  | 12087125.02 |
| Com_1195_pos | N-Acetyl-D-lysine                      | C14 H25  | 383.143          | 1.406    | 384.151 | Full match    | Full match    | No results    | 122905842.1 | 93803387.93 | 85620268.23 |
| Com_1437_pos | $\alpha$ -Linolenic acid               | C20 H35  | 321.267          | 8.714    | 322.274 | Full match    | Full match    | No results    | 127768672.1 | 138532109.3 | 120150386.7 |
| Com_1463_pos | DL- $\alpha$ -Aminocaproic acid        | C8 H17 N | 159.126          | 4.053    | 160.133 | Full match    | Full match    | Full match    | 125921811   | 95605158.23 | 83299622.65 |
| Com_1631_pos | 5 $\alpha$ -Dihydrotestosterone        | C19 H30  | 290.224          | 8.274    | 291.231 | Full match    | Full match    | Full match    | 114162516.4 | 59999741.29 | 23866531.82 |
| Com_1702_pos | 4-Methyl-5-thiazolone                  | C6 H9 N  | 143.041          | 1.312    | 144.048 | Full match    | Full match    | No results    | 109108446.6 | 59101947.08 | 45521732.95 |
| Com_1750_pos | N3,N4-Dimethylthiazole                 | C8 H18 N | 202.143          | 1.363    | 203.15  | Full match    | Full match    | Full match    | 68775030.28 | 106305476.7 | 91711907.58 |
| Com_1971_pos | Isohomovanillin                        | C9 H10 O | 182.058          | 5.22     | 183.065 | Full match    | Full match    | Full match    | 53359601.03 | 83277802.08 | 35578008.88 |
| Com_1983_pos | 4',7-Dihydroxyflavone                  | C15 H12  | 256.073          | 5.728    | 257.081 | Full match    | Full match    | No results    | 13374516.44 | 24019054.4  | 27946086.81 |
| Com_2013_pos | Diosmetin                              | C16 H12  | 300.063          | 6.081    | 301.07  | Full match    | Full match    | No results    | 5323679.289 | 10775073.92 | 2293532.553 |
| Com_2023_pos | N8-Acetylspermidine                    | C9 H21 N | 187.169          | 1.234    | 188.176 | Full match    | Full match    | No results    | 24164423.33 | 23605748.37 | 55659833.32 |
| Com_2041_pos | (2E)-3-(3,4-cyclohexadienyl)acrylamide | C11 H12  | 208.073          | 5.949    | 209.081 | Full match    | Full match    | Full match    | 90614983.63 | 107630213.3 | 121176482.7 |
| Com_2170_pos | Histamine                              | C5 H9 N3 | 111.08           | 1.167    | 112.087 | Full match    | Full match    | Full match    | 6682182.208 | 60758476.68 | 5696013.157 |
| Com_2183_pos | 5,7-dihydroxyflavone                   | C15 H10  | 270.052          | 5.665    | 271.059 | Full match    | Full match    | No results    | 33071384.51 | 46607663.72 | 12093762.22 |
| Com_2311_pos | D-Sphingosine                          | C18 H37  | 299.282          | 6.914    | 300.289 | Full match    | Full match    | Full match    | 29945359.04 | 21487022.47 | 17602384.4  |

|               |               |          |         |       |         |              |               |            |             |             |             |
|---------------|---------------|----------|---------|-------|---------|--------------|---------------|------------|-------------|-------------|-------------|
| Com_2402_pos  | (+)-ar-Turmer | C15 H20  | 216.151 | 5.528 | 217.159 | Full match   | Full match    | No results | 74725992.77 | 65132702.3  | 95999665.43 |
| Com_2442_pos  | Cortisol      | C21 H30  | 362.208 | 6.006 | 363.216 | Full match   | Full match    | Full match | 35621389.79 | 47073163.62 | 54714125.51 |
| Com_2517_pos  | 5-(E)-2-(3,5  | C15 H14  | 274.083 | 5.899 | 275.09  | Full match   | Full match    | No results | 2236035.038 | 5452932.968 | 2261591.147 |
| Com_3006_pos  | N-Acetylserot | C12 H14  | 218.106 | 5.263 | 219.113 | Full match   | Full match    | Full match | 18024816.66 | 34882182.14 | 29034409.41 |
| Com_3189_pos  | trans-Cinnama | C9 H8 O  | 132.057 | 5.571 | 133.065 | Full match   | Full match    | No results | 52616732.39 | 58306393.39 | 59752106.18 |
| Com_3393_pos  | Indole-3-acet | C10 H9 N | 175.063 | 5.717 | 176.071 | Full match   | Full match    | Full match | 15998442.3  | 63773882.38 | 61389648.04 |
| Com_11365_pos | 7-hydroxy-3-( | C16 H12  | 268.073 | 6.258 | 269.08  | Full match   | Full match    | No results | 2242568.698 | 2093235.774 | 851577.7659 |
| Com_12574_pos | 7-(1H-pyrrol- | C16 H10  | 262.074 | 6.627 | 263.081 | Full match   | Full match    | No results | 848267.3171 | 6636556.924 | 3213410.976 |
| Com_13_pos    | L-Glutamic ac | C5 H9 N  | 147.053 | 1.3   | 148.06  | Full match   | Full match    | Full match | 3532803649  | 2557210045  | 2280203790  |
| Com_40_pos    | Creatine      | C4 H9 N3 | 131.07  | 1.363 | 132.077 | Full match   | Full match    | Full match | 5592849475  | 3977940366  | 4237079163  |
| Com_72_pos    | L-Phenylalani | C9 H11 N | 165.079 | 4.974 | 166.086 | Full match   | Full match    | Full match | 2215639213  | 1342685362  | 1185091842  |
| Com_86_pos    | L-Tyrosine    | C9 H11 N | 181.074 | 2.315 | 182.081 | Full match   | Full match    | Full match | 1514614680  | 1306578193  | 1410914258  |
| Com_94_pos    | D-(-)-Glutami | C5 H10 N | 146.069 | 1.282 | 147.077 | Full match   | Full match    | Full match | 1185860298  | 901470984.1 | 581230898.6 |
| Com_106_pos   | 5-Hydroxyindc | C10 H9 N | 191.058 | 5.496 | 192.065 | Full match   | Full match    | Full match | 2227757403  | 2810192851  | 2556716070  |
| Com_156_pos   | Leucylproline | C11 H20  | 228.147 | 5.103 | 229.155 | Full match   | Full match    | Full match | 1415435435  | 1177074452  | 510839134.2 |
| Com_159_pos   | N-Acetyl-D-ga | C8 H15 N | 221.09  | 1.388 | 222.097 | Full match   | Full match    | Full match | 1393797287  | 1507345596  | 1056565553  |
| Com_183_pos   | Pipecolic aci | C6 H11 N | 129.079 | 1.139 | 130.086 | Full match   | Full match    | Full match | 757073196.3 | 530009852.6 | 845534299.7 |
| Com_204_pos   | Adenine       | C5 H5 N5 | 135.055 | 1.659 | 136.062 | Full match   | Full match    | Full match | 948263328.6 | 1046238163  | 923245367.5 |
| Com_230_pos   | Hypoxanthine  | C5 H4 N4 | 136.038 | 3.739 | 137.046 | Full match   | Full match    | Full match | 373411815.9 | 430773529.7 | 131945644.6 |
| Com_245_pos   | Guanine       | C5 H5 N5 | 151.049 | 1.682 | 152.057 | Full match   | Full match    | Full match | 755941098.1 | 1103926645  | 593751381.1 |
| Com_256_pos   | Daidzein      | C15 H10  | 254.057 | 5.8   | 255.064 | Full match   | Full match    | No results | 136054509.5 | 185161263.8 | 89923911.48 |
| Com_274_pos   | DL-Arginine   | C6 H14 N | 174.112 | 1.259 | 175.119 | Full match   | Full match    | Full match | 526046069.8 | 399002291.5 | 248072224.7 |
| Com_298_pos   | Pantothenic a | C9 H17 N | 219.111 | 5.06  | 220.118 | Full match   | Full match    | Full match | 292521397.3 | 437212098.7 | 605192044.4 |
| Com_361_pos   | 4-Hydroxybenz | C7 H6 O2 | 122.037 | 2.292 | 123.044 | Full match   | Full match    | Full match | 316967128.7 | 344917152.1 | 312798304.8 |
| Com_428_pos   | Valylproline  | C10 H18  | 214.132 | 4.801 | 215.139 | Full match   | Full match    | No results | 492801974.5 | 407403484.6 | 210578826.1 |
| Com_532_pos   | Pyridoxine    | C8 H11 N | 169.074 | 2.101 | 170.081 | Full match   | Full match    | Full match | 382268115.9 | 303193571.3 | 193049907.4 |
| Com_537_pos   | Glycyl-L-leuc | C8 H16 N | 188.116 | 5.003 | 189.123 | Full match   | Full match    | Full match | 100807467.6 | 94061758.93 | 41212127.52 |
| Com_562_pos   | Nicotinamide  | C6 H6 N2 | 122.048 | 2.234 | 123.055 | Full match   | Full match    | Full match | 32809182.85 | 31859928.94 | 34781068.86 |
| Com_589_pos   | DL-5-Methoxyt | C12 H14  | 234.1   | 5.117 | 235.108 | Full match   | Full match    | No results | 16160438.96 | 10982314.57 | 15206157.51 |
| Com_768_pos   | Kynurenic aci | C10 H7 N | 189.042 | 5.921 | 190.049 | Full match   | Full match    | Full match | 114688502.2 | 157853036.2 | 158172747.8 |
| Com_770_pos   | Cytidine      | C9 H13 N | 243.086 | 1.418 | 244.093 | Full match   | Full match    | Full match | 248775056.1 | 319366744.1 | 117969477   |
| Com_778_pos   | 16-Hydroxyhex | C16 H32  | 272.235 | 7.981 | 273.242 | Full match   | Full match    | No results | 248869551.9 | 153386259.2 | 127701430.2 |
| Com_782_pos   | 4-Pyridoxic a | C8 H9 N  | 183.053 | 3.865 | 184.061 | Full match   | Full match    | Full match | 247599403   | 205001912.2 | 240919563.5 |
| Com_844_pos   | Asparagine    | C4 H8 N2 | 132.054 | 1.274 | 133.061 | Full match   | Full match    | Full match | 65586478.32 | 7190704.004 | 9620894.425 |
| Com_947_pos   | 18-β-Glycyrr  | C30 H46  | 470.339 | 6.73  | 471.346 | Full match   | Full match    | No results | 46468655.38 | 62802790.59 | 56495908.14 |
| Com_954_pos   | Xanthurenic a | C10 H7 N | 205.037 | 5.3   | 206.044 | Full match   | Full match    | Full match | 107041207.4 | 217649743.5 | 94205520.29 |
| Com_1011_pos  | L-Histidine   | C6 H9 N3 | 155.07  | 1.258 | 156.077 | Full match   | Full match    | Full match | 147205925.7 | 99139443.45 | 46238488.22 |
| Com_1291_pos  | Corticosteron | C21 H30  | 346.214 | 5.882 | 347.221 | Full match   | Full match    | Full match | 37529025.35 | 53878173.37 | 64810254.56 |
| Com_1708_pos  | Inosine       | C10 H12  | 268.081 | 3.727 | 269.088 | Full match   | Full match    | Full match | 78558277.81 | 67812138.23 | 17675243.85 |
| Com_1723_pos  | Naringenin    | C15 H12  | 272.068 | 5.91  | 273.075 | Full match   | Full match    | No results | 6219255.563 | 17104548.97 | 2010338.499 |
| Com_2034_pos  | 6-Hydroxymela | C13 H16  | 248.116 | 5.5   | 249.123 | Full match   | Full match    | Full match | 6732733.657 | 6529739.865 | 6113209.204 |
| Com_2074_pos  | L-Saccharopin | C11 H20  | 276.132 | 1.438 | 277.139 | Full match   | Full match    | Full match | 88790459.27 | 65925225.49 | 56383646.18 |
| Com_2148_pos  | Progesterone  | C21 H30  | 314.224 | 6.772 | 315.232 | Full match   | Full match    | Full match | 19169964.55 | 31583593.88 | 33220648.55 |
| Com_2397_pos  | 4-Phenylbutyr | C10 H12  | 164.084 | 9.79  | 165.091 | Full match   | Full match    | Full match | 47354322.41 | 43986152.04 | 36009308.71 |
| Com_2437_pos  | 19-Nortestost | C18 H26  | 274.193 | 6.702 | 275.2   | Full match   | Full match    | Full match | 44921199.39 | 55468699.4  | 56713810.92 |
| Com_2900_pos  | 5-Methoxyindc | C11 H11  | 205.074 | 5.631 | 206.081 | Full match   | Full match    | Full match | 12364319.02 | 12379511.4  | 10806314.24 |
| Com_3427_pos  | D-Pantethine  | C22 H42  | 554.244 | 5.484 | 555.251 | Full match   | Full match    | Full match | 7595321.911 | 25021191.16 | 36573208.07 |
| Com_21_pos    | L-Norleucine  | C6 H13 N | 131.095 | 3.067 | 132.102 | Full match   | Not the top h | Full match | 10929875897 | 4934173206  | 3884177686  |
| Com_48_pos    | (+/-)12(13)-  | C18 H34  | 296.235 | 8.395 | 297.242 | Invalid mass | Invalid mass  | No match   | 4351192406  | 2749048534  | 2390939009  |
| Com_50_pos    | tert-Butyl N- | C11 H22  | 230.163 | 5.125 | 231.17  | No results   | Full match    | No results | 349350214.5 | 346747180.7 | 147079113.9 |
| Com_61_pos    | 2-Hydroxycinn | C9 H8 O3 | 164.047 | 2.302 | 165.055 | Full match   | Not the top h | Full match | 1662901494  | 874352162.4 | 1427727795  |
| Com_130_pos   | Ginkgolic aci | C24 H38  | 374.282 | 7.095 | 375.29  | No results   | Full match    | No results | 87083448.64 | 661881955.3 | 1002096046  |
| Com_132_pos   | Homo-Gamma-Li | C20 H34  | 306.255 | 7.24  | 307.262 | No results   | No results    | Full match | 656643055   | 754985634.8 | 822358239.4 |
| Com_142_pos   | Apocynin      | C9 H10 O | 184.073 | 5.532 | 185.081 | Invalid mass | Invalid mass  | No results | 82796096.54 | 88295044.76 | 35115203.21 |

|              |                       |          |         |       |         |              |               |            |             |             |             |
|--------------|-----------------------|----------|---------|-------|---------|--------------|---------------|------------|-------------|-------------|-------------|
| Com_155_pos  | 9-Oxo-ODE             | C18 H30  | 294.219 | 7.997 | 295.226 | Full match   | Partial match | Full match | 1428902278  | 1256135390  | 1067816374  |
| Com_163_pos  | D-(+)-Maltose         | C12 H22  | 364.098 | 1.325 | 365.106 | Invalid mass | Invalid mass  | No results | 1314610835  | 965290365.6 | 655648684.6 |
| Com_173_pos  | 5-[(10Z)-14-(C26      | H36      | 412.258 | 7.705 | 413.266 | Invalid mass | No results    | No results | 444013106.5 | 483796268.6 | 968591343.8 |
| Com_187_pos  | 12,13-EODE            | C18 H32  | 296.235 | 6.96  | 297.242 | No results   | No results    | Full match | 1131083162  | 463206718.8 | 500855469.6 |
| Com_236_pos  | N-[1-(4-methoxy       | C13 H19  | 270.158 | 5.042 | 271.165 | Invalid mass | No results    | No results | 859227496.8 | 264463277.8 | 793104777   |
| Com_259_pos  | 5,6-dimethoxy         | C18 H16  | 136.053 | 5.603 | 295.095 | Invalid mass | No results    | No match   | 770788717.8 | 1039069271  | 927540160.2 |
| Com_290_pos  | 3-Methoxy pnc         | C21 H38  | 351.227 | 6.702 | 352.234 | Invalid mass | Invalid mass  | No results | 139895879.9 | 50074795.84 | 157377679.5 |
| Com_291_pos  | 3-amino-2-phe         | C12 H10  | 242.08  | 5.82  | 243.088 | Full match   | No results    | No results | 738128823.6 | 334486128.9 | 243110711.5 |
| Com_299_pos  | 4-oxododecane         | C12 H20  | 244.131 | 5.544 | 245.138 | Full match   | No results    | No results | 717334037.7 | 380503610.8 | 880889524.5 |
| Com_302_pos  | 4-Aminobenzoi         | C7 H7 N  | 137.048 | 1.402 | 138.055 | Full match   | Not the top h | Full match | 715859964.3 | 561398976.6 | 451080067   |
| Com_320_pos  | N-(2-hydroxy          | C8 H9 N  | 173.047 | 5.439 | 174.054 | Invalid mass | No match      | No match   | 31423698.19 | 887044727.5 | 28525971.75 |
| Com_321_pos  | L(-)-Carnitir         | C7 H15 N | 161.105 | 1.418 | 162.113 | Full match   | No results    | Full match | 215167298.1 | 281746323.3 | 220342975.9 |
| Com_354_pos  | 3-methyl-5-ox         | C13 H17  | 257.103 | 1.303 | 258.11  | Invalid mass | No match      | No match   | 611640135.5 | 82063822.74 | 152100644.5 |
| Com_380_pos  | Celestolide           | C17 H24  | 266.163 | 5.025 | 267.17  | Invalid mass | No results    | No results | 23001677.53 | 36614980.92 | 9204011.617 |
| Com_391_pos  | 13,14-Dihydr          | C20 H36  | 338.245 | 6.098 | 339.252 | Invalid mass | No results    | No results | 546874989.2 | 345458831.3 | 473677759.3 |
| Com_437_pos  | Tiglic acid           | C5 H8 O2 | 100.053 | 1.419 | 101.06  | No results   | No results    | Full match | 189677883.6 | 229445135.3 | 126168431.9 |
| Com_443_pos  | 1,4-dihydroxy         | C19 H36  | 310.25  | 8.394 | 311.258 | Invalid mass | No results    | No results | 468491818.2 | 258103216.8 | 161541188   |
| Com_445_pos  | Norbutorphan          | C16 H21  | 259.153 | 5.024 | 260.161 | No results   | Invalid mass  | No results | 165905552.6 | 105937628.3 | 79098468.08 |
| Com_451_pos  | Perillene             | C10 H14  | 150.104 | 8.121 | 151.112 | No results   | Full match    | No results | 163906727.6 | 158080521.6 | 230803003.8 |
| Com_466_pos  | 4-(2-((4-Meth         | C17 H13  | 291.095 | 1.378 | 292.102 | Invalid mass | No results    | No results | 388381718.5 | 577037920.7 | 294576279.9 |
| Com_467_pos  | Styrene               | C8 H8    | 104.063 | 8.119 | 105.07  | No results   | No results    | Full match | 129266954.1 | 136203353.3 | 213603990   |
| Com_480_pos  | KPK                   | C17 H33  | 353.243 | 6.676 | 354.25  | Invalid mass | No results    | No results | 25012608.72 | 110573034.6 | 43061684.03 |
| Com_489_pos  | Valerophenone         | C11 H14  | 162.104 | 5.545 | 163.112 | Full match   | No results    | No results | 420997210.7 | 241307505.2 | 522483917.8 |
| Com_497_pos  | Kanosamine            | C6 H13 N | 201.064 | 1.343 | 202.072 | Invalid mass | No results    | No results | 411969649.1 | 311051352.2 | 203703151.1 |
| Com_515_pos  | 2-Methoxybenz         | C8 H8 O2 | 136.052 | 5.601 | 137.059 | Full match   | Partial match | Full match | 152547832.8 | 178449836.2 | 64070159.94 |
| Com_519_pos  | 4-(methylthio         | C17 H12  | 282.095 | 1.326 | 305.084 | Invalid mass | No results    | No results | 327094371.7 | 513763647.3 | 437142755.3 |
| Com_523_pos  | 3,3-dimethyl-         | C14 H19  | 249.136 | 5.02  | 250.144 | Full match   | No results    | No results | 31327737.9  | 41629437.95 | 12789508.4  |
| Com_539_pos  | Alanyltyrosin         | C12 H16  | 252.111 | 5.118 | 253.118 | Full match   | No results    | No results | 92652781.45 | 52741691.45 | 55320976.45 |
| Com_596_pos  | PC (7:0/8:0)          | C23 H46  | 495.296 | 6.137 | 496.303 | No results   | Full match    | No results | 336151661.7 | 359156559.4 | 262377090.9 |
| Com_638_pos  | Tropine               | C8 H15 N | 141.115 | 4.964 | 142.122 | Full match   | No results    | No results | 11386958.18 | 4951658.923 | 4409487.819 |
| Com_664_pos  | Azetidine-2-c         | C4 H7 N  | 101.048 | 1.298 | 102.055 | No results   | No results    | Full match | 129819844.4 | 82567277.29 | 79656413.76 |
| Com_671_pos  | ethyl 3-[5-(e         | C15 H22  | 294.158 | 5.032 | 295.165 | Full match   | No results    | No results | 287627887.5 | 136387298.1 | 238871876   |
| Com_682_pos  | D-Glucosamine         | C6 H13 N | 179.079 | 1.294 | 180.087 | No results   | No results    | Full match | 242717242.5 | 164512163.1 | 151893737.6 |
| Com_686_pos  | Anacardic aci         | C22 H36  | 338.295 | 6.128 | 361.284 | Invalid mass | No results    | No results | 276886675.1 | 283199822.6 | 261683311.8 |
| Com_719_pos  | p-Mentha-1,3,         | C10 H14  | 134.109 | 8.121 | 135.117 | No results   | No results    | Full match | 79981329.45 | 83437118.87 | 122635941.3 |
| Com_724_pos  | Glabrolide            | C30 H44  | 468.324 | 6.512 | 469.331 | No results   | Full match    | No results | 267759670.4 | 167221706.2 | 144701683.1 |
| Com_756_pos  | UR-144 N-(2-h         | C21 H29  | 327.215 | 5.283 | 328.223 | Invalid mass | No results    | No results | 90254581.05 | 71795350.35 | 43505415.05 |
| Com_759_pos  | 2-(2-amino-3-         | C14 H20  | 264.147 | 5.199 | 265.155 | Full match   | Partial match | Full match | 46650253.5  | 31409580.23 | 19946717.79 |
| Com_776_pos  | Sedanolid             | C12 H18  | 176.12  | 8.123 | 177.127 | Invalid mass | Invalid mass  | No results | 73307178.57 | 95702453.31 | 104169660.8 |
| Com_779_pos  | FMH                   | C20 H27  | 433.182 | 4.661 | 434.188 | Invalid mass | No results    | No results | 110490892.4 | 174407157.6 | 128220858.2 |
| Com_786_pos  | L-Dopa                | C9 H11 N | 197.068 | 4.894 | 198.076 | Full match   | No results    | Full match | 246758616.5 | 185808364   | 158846039.9 |
| Com_797_pos  | 2'-Deoxydenc          | C10 H13  | 273.085 | 1.374 | 274.092 | Invalid mass | No results    | No results | 128390525.4 | 318108430   | 221071746.3 |
| Com_835_pos  | Prostaglandin         | C20 H32  | 352.222 | 5.879 | 353.23  | No results   | Invalid mass  | No results | 231036577.9 | 210141669   | 119785173.2 |
| Com_874_pos  | 0-Arachidonoy         | C22 H37  | 347.282 | 6.079 | 348.289 | Full match   | Not the top h | No results | 205454619.1 | 222847147.5 | 107510143   |
| Com_888_pos  | ERH                   | C17 H28  | 440.218 | 8.121 | 441.225 | Invalid mass | No results    | No results | 60771247.63 | 85222553.21 | 56754762.08 |
| Com_904_pos  | L-Homocitrull         | C7 H15 N | 189.111 | 1.427 | 173.092 | No results   | No results    | Full match | 209780677.4 | 257077149.9 | 161445101.9 |
| Com_918_pos  | Methyl dopa           | C10 H13  | 211.084 | 5.203 | 212.091 | No results   | No results    | Full match | 32298243.89 | 27022898.05 | 58713501.77 |
| Com_935_pos  | Testosterone          | C30 H48  | 456.359 | 6.953 | 457.367 | Full match   | Not the top h | No results | 201714037   | 230113893.1 | 60850482.76 |
| Com_973_pos  | 3,14-dihydro-         | C16 H26  | 280.167 | 5.695 | 281.174 | Invalid mass | No results    | No results | 192397586.8 | 169207406.1 | 172024377.1 |
| Com_989_pos  | AKB48 N-(4-hy         | C23 H31  | 364.211 | 5.245 | 365.218 | Invalid mass | No results    | No results | 18898778.43 | 12116833.69 | 7752576.419 |
| Com_1006_pos | $\alpha$ -Aspartylph  | C13 H16  | 280.11  | 5.566 | 281.117 | Invalid mass | No results    | No results | 184778307.8 | 188173971.8 | 248736832.9 |
| Com_1030_pos | 01-[4-(tert-t         | C17 H26  | 376.138 | 5.423 | 377.146 | Invalid mass | No match      | No match   | 30948270.8  | 33352763    | 26983792.11 |
| Com_1036_pos | 15-Deoxy- $\Delta$ 12 | C20 H30  | 300.209 | 8.12  | 301.216 | Invalid mass | Invalid mass  | No match   | 73420995.7  | 69447763.13 | 80584358.97 |
| Com_1038_pos | Oleanolic aci         | C30 H48  | 217.188 | 7.116 | 457.366 | No results   | Invalid mass  | No results | 30609882.64 | 203404140   | 21167124.51 |

|              |               |          |         |       |         |              |               |             |             |             |             |
|--------------|---------------|----------|---------|-------|---------|--------------|---------------|-------------|-------------|-------------|-------------|
| Com_1089_pos | 3-hydroxy-2-c | C13 H24  | 242.152 | 5.802 | 243.159 | Invalid mass | No results    | No results  | 172443217.3 | 145120413.1 | 167559170.8 |
| Com_1105_pos | L-threo-3-Phe | C9 H11 N | 181.074 | 1.437 | 182.081 | Full match   | No results    | Full match  | 168306059.2 | 201920259.7 | 191003326.3 |
| Com_1151_pos | ethyl 5-methc | C19 H19  | 309.14  | 5.248 | 310.147 | Invalid mass | No results    | No results  | 158937652.1 | 104837082.9 | 156800449.6 |
| Com_1156_pos | Cholecalcifer | C27 H44  | 384.334 | 6.274 | 385.341 | Invalid mass | Invalid mass  | No results  | 103245050.3 | 98290894.96 | 81241640.98 |
| Com_1163_pos | 6-methyl-4-(n | C15 H17  | 259.117 | 1.455 | 260.124 | Invalid mass | No results    | No results  | 157279404.3 | 92057046.03 | 108194356   |
| Com_1170_pos | 16,16-Dimethy | C22 H36  | 386.244 | 6.092 | 387.252 | Invalid mass | No match      | No results  | 53676634.73 | 204180351   | 101843219   |
| Com_1201_pos | N-Stearoyl ta | C20 H41  | 204.151 | 7.31  | 205.158 | Invalid mass | No results    | No results  | 152900965.5 | 122434297.6 | 138483706.4 |
| Com_1206_pos | 4-(2,3-dihydr | C12 H14  | 239.116 | 5.105 | 240.123 | Invalid mass | No match      | No results  | 152267425.1 | 33096276.84 | 133395547.7 |
| Com_1212_pos | (±)-Absciscic | C15 H20  | 286.117 | 1.428 | 287.124 | Invalid mass | Invalid mass  | No results  | 134739289   | 96835651.56 | 76501485.23 |
| Com_1244_pos | 5-allyl-4,6-c | C11 H12  | 171.068 | 5.47  | 172.076 | Invalid mass | Invalid mass  | No results  | 5165291.64  | 6297511.131 | 6161488.36  |
| Com_1253_pos | Mesalamine    | C7 H7 N  | 153.043 | 4.975 | 154.05  | Full match   | Partial match | Full match  | 146632113.7 | 56537836.05 | 79481323.47 |
| Com_1255_pos | tetranor-12(F | C16 H26  | 248.177 | 8.12  | 249.184 | Invalid mass | Invalid mass  | No results  | 40009037.36 | 45999372.49 | 63599209.78 |
| Com_1321_pos | Ecgonine meth | C10 H17  | 199.121 | 4.955 | 200.128 | Full match   | No results    | No results  | 86249584.82 | 78688650.7  | 54268681.13 |
| Com_1369_pos | RMH           | C17 H30  | 442.21  | 5.551 | 443.217 | Full match   | No results    | No results  | 7849800.93  | 10584373.86 | 3412099.252 |
| Com_1409_pos | Ailanthone    | C20 H24  | 376.152 | 5.588 | 377.159 | No results   | Full match    | No results  | 13237173.51 | 11933214.74 | 10365876.05 |
| Com_1411_pos | Androsterone  | C19 H30  | 272.214 | 6.775 | 273.22  | Invalid mass | Invalid mass  | No results  | 26721463.79 | 63873112.36 | 57861174.31 |
| Com_1412_pos | 2-[(3S)-1-Ber | C18 H18  | 294.121 | 4.927 | 295.129 | Invalid mass | No match      | No match    | 76193336.26 | 42014012.71 | 33793450.74 |
| Com_1422_pos | Coenzyme Q2   | C19 H26  | 318.182 | 6.694 | 319.189 | No results   | Full match    | No results  | 71116097.9  | 86706598.64 | 79475798.1  |
| Com_1445_pos | IMH           | C17 H29  | 399.201 | 5.212 | 400.208 | Invalid mass | No results    | No results  | 78344043.31 | 82701871.4  | 37157877.62 |
| Com_1453_pos | Muscone       | C16 H30  | 260.214 | 8.395 | 261.22  | No results   | Invalid mass  | No results  | 126853847.7 | 65726985.31 | 60754299.92 |
| Com_1485_pos | 9-Oxo-10(E),1 | C18 H30  | 294.217 | 8.231 | 295.224 | Invalid mass | Invalid mass  | No results  | 124436478.2 | 65502667.11 | 63250523.72 |
| Com_1502_pos | PLK           | C17 H32  | 339.217 | 1.329 | 340.224 | Invalid mass | No results    | No results  | 1305696.276 | 2149789.558 | 1068100.479 |
| Com_1520_pos | Isorhapontige | C15 H14  | 258.089 | 6.081 | 259.096 | Full match   | No results    | No results  | 43439018.94 | 72737080.25 | 71823809.86 |
| Com_1526_pos | VLK           | C17 H34  | 358.258 | 5.041 | 359.265 | Full match   | No results    | No results  | 37469385.57 | 23278003.06 | 13090935.09 |
| Com_1540_pos | 3-(2-Hydroxye | C10 H11  | 161.084 | 5.348 | 162.091 | No results   | Full match    | No results  | 120698922.3 | 79130610.68 | 82851052.76 |
| Com_1542_pos | (6E)-7-(2H-1, | C19 H25  | 315.179 | 4.935 | 316.186 | Invalid mass | No results    | No results  | 23360109.47 | 15880450.83 | 8831893.818 |
| Com_1553_pos | N-[3-(2-methy | C18 H16  | 304.127 | 1.416 | 305.135 | Invalid mass | No results    | No results  | 119544712.7 | 89215392.33 | 61351116.02 |
| Com_1554_pos | 6-Methylnicot | C7 H8 N2 | 153.09  | 1.422 | 154.098 | No results   | Invalid mass  | No match    | 36952687.44 | 104209439.6 | 27806155.12 |
| Com_1556_pos | Dihydromethyl | C15 H16  | 276.099 | 6.256 | 277.106 | No results   | Full match    | No results  | 43012596.28 | 71466295.38 | 70288796.07 |
| Com_1565_pos | Loxoprofen    | C15 H18  | 246.121 | 5.062 | 247.129 | No results   | Invalid mass  | No results  | 21811634.42 | 23389944.49 | 11706986.73 |
| Com_1573_pos | L-Adrenaline  | C9 H13 N | 183.09  | 5.334 | 201.123 | No results   | No results    | Full match  | 118283615.4 | 59620669.57 | 41686122.32 |
| Com_1575_pos | 4-(pentyloxy) | C12 H18  | 222.137 | 4.845 | 223.144 | Full match   | No results    | No results  | 118195187.7 | 61486675.61 | 100610470   |
| Com_1591_pos | Acetyl-L-carr | C9 H17 N | 203.117 | 1.431 | 204.124 | Full match   | No results    | Not the top | 116902482   | 55348302.72 | 125808430.1 |
| Com_1597_pos | D-Raffinose   | C18 H32  | 526.152 | 1.368 | 527.159 | Invalid mass | Invalid mass  | No results  | 116446360.3 | 55440242.21 | 92345936.46 |
| Com_1607_pos | 6-Aminonicoti | C6 H7 N3 | 137.059 | 1.429 | 138.066 | No results   | No results    | Full match  | 115942965.1 | 79940807.2  | 84304235.39 |
| Com_1612_pos | 5-methyl-3-(2 | C14 H16  | 276.111 | 5.301 | 277.118 | Full match   | No results    | No results  | 115410789.7 | 123737172.5 | 83763198.34 |
| Com_1627_pos | 6-Methylquinc | C10 H9 N | 143.073 | 5.345 | 144.081 | Full match   | Partial match | No results  | 114817301.2 | 73912530.72 | 75548429.62 |
| Com_1628_pos | Mycophenolic  | C17 H20  | 302.111 | 1.419 | 303.119 | Invalid mass | No results    | No results  | 114789464.4 | 112595802.6 | 79169311.61 |
| Com_1664_pos | Prostaglandin | C20 H34  | 354.24  | 5.899 | 355.248 | No results   | No results    | Full match  | 111513527.3 | 92900924.34 | 107800837.3 |
| Com_1680_pos | 1,3-Dihydro-1 | C13 H15  | 201.115 | 5.358 | 202.123 | Full match   | No results    | No results  | 110482591.4 | 47973636.85 | 18355047.54 |
| Com_1689_pos | (2R)-2-[(2R,5 | C11 H20  | 216.136 | 5.821 | 217.143 | Full match   | No results    | Full match  | 23368898.47 | 143407608.3 | 143139647.8 |
| Com_1699_pos | Cortisone     | C21 H28  | 360.2   | 5.137 | 343.197 | Invalid mass | No results    | No results  | 54538258.33 | 38488384.68 | 28735005.97 |
| Com_1712_pos | Strophanthidi | C23 H32  | 404.218 | 5.922 | 405.225 | No results   | Invalid mass  | No results  | 108357812   | 3041928.643 | 65189876.22 |
| Com_1714_pos | (12Z)-9,10,11 | C18 H34  | 352.223 | 6.371 | 353.23  | Invalid mass | Invalid mass  | No results  | 108317554.8 | 122442136   | 84071564.47 |
| Com_1783_pos | 3-[(2-phenyl- | C18 H13  | 287.101 | 1.419 | 288.109 | Invalid mass | No results    | No results  | 104367434.4 | 97186534.72 | 67946054.75 |
| Com_1787_pos | Punicic Acid  | C18 H30  | 278.224 | 6.692 | 279.231 | No results   | No results    | Full match  | 72565095.74 | 53758762.97 | 44864755.8  |
| Com_1804_pos | 1-hydroxy-2-f | C13 H12  | 228.09  | 5.375 | 229.097 | Full match   | No results    | No results  | 102859061.4 | 86769772.8  | 94406621.37 |
| Com_1814_pos | N6-Me-dA      | C11 H15  | 265.117 | 1.408 | 266.124 | Full match   | No results    | No results  | 101939246.3 | 68559705.91 | 45185323.87 |
| Com_1827_pos | SPK           | C14 H26  | 330.192 | 4.942 | 331.199 | Full match   | No results    | No results  | 34395563.54 | 28299820    | 17798624.88 |
| Com_1831_pos | 5-(6-hydroxy- | C13 H22  | 248.137 | 1.416 | 249.144 | Invalid mass | No results    | No results  | 101016393.3 | 90001485.74 | 80366631.03 |
| Com_1834_pos | APK           | C14 H26  | 356.206 | 5.18  | 357.213 | Invalid mass | No results    | No results  | 37773180.81 | 22635743.17 | 13502290.29 |
| Com_1842_pos | N-[(4-hydroxy | C18 H29  | 329.195 | 5.183 | 330.202 | Invalid mass | No results    | No results  | 66994016.17 | 42954338.45 | 17488605.5  |
| Com_1882_pos | 5-Methoxyind  | C10 H9 N | 175.063 | 5.129 | 176.07  | No results   | No results    | Full match  | 14693180.25 | 11541370.07 | 42254626.2  |
| Com_1887_pos | VLH           | C17 H29  | 367.222 | 5.047 | 368.229 | Full match   | No results    | No results  | 12723601.8  | 8045355.481 | 4602905.142 |

|              |                            |          |         |       |         |              |               |            |             |             |             |
|--------------|----------------------------|----------|---------|-------|---------|--------------|---------------|------------|-------------|-------------|-------------|
| Com_1891_pos | 4'-Methoxyace              | C9 H10 C | 150.068 | 6.77  | 151.075 | Full match   | Partial match | Full match | 73480676.71 | 127498698   | 89056540.57 |
| Com_1915_pos | 4-Ethylbenzal              | C9 H10 C | 134.073 | 8.12  | 135.08  | No results   | Full match    | No results | 33010358.8  | 39931204.39 | 52038939.31 |
| Com_1946_pos | allantoate                 | C4H7N4O4 | 175.121 | 2.017 | 176.128 | No results   | No results    | Full match | 95204446.06 | 52597587.89 | 84172296.3  |
| Com_1968_pos | 1-(4-methylph              | C24 H20  | 322.137 | 1.407 | 323.145 | Invalid mass | No results    | No results | 93696039.54 | 74554261.18 | 52647287.34 |
| Com_1969_pos | (±)13-HpODE                | C18 H32  | 294.219 | 8.176 | 295.226 | Invalid mass | No match      | No match   | 71398089    | 51819901.94 | 73011875.22 |
| Com_1974_pos | 4-(1H-pyrazol              | C21 H19  | 405.125 | 1.367 | 406.132 | Full match   | No results    | No results | 32387074.52 | 40761671.97 | 55118545.94 |
| Com_2032_pos | 4-Methyl-6,7-              | C10 H8 C | 192.042 | 1.431 | 193.05  | No results   | Full match    | No results | 90928890.51 | 85692208.59 | 70953914.05 |
| Com_2033_pos | Phosphocholir              | C5 H14 N | 183.066 | 6.16  | 184.073 | No results   | Full match    | No results | 90864965.78 | 112407242.2 | 79236162.76 |
| Com_2037_pos | N',N''-di[1C               | H16      | 402.131 | 5.621 | 385.127 | Invalid mass | No results    | No results | 32915958.94 | 42878042.5  | 21210110.43 |
| Com_2050_pos | 1,7-bis(4-hyc              | C19 H22  | 298.152 | 5.193 | 299.159 | Invalid mass | No results    | No results | 90416206.2  | 68421922.59 | 71672302.25 |
| Com_2058_pos | Leu-Pro                    | C11 H20  | 228.148 | 1.434 | 229.155 | No results   | No results    | Full match | 42956079.16 | 42492710.27 | 21130738.27 |
| Com_2094_pos | 2-(3,5-dimeth              | C13 H14  | 123.05  | 5.316 | 247.107 | Invalid mass | No results    | No results | 71848278.55 | 65128815.79 | 68340997.42 |
| Com_2106_pos | 4-methoxy-6-(              | C11 H12  | 192.078 | 5.703 | 193.085 | Full match   | Partial match | No results | 43152251.01 | 48340267.95 | 41357774.38 |
| Com_2120_pos | 3-phenyl-2-(3              | C14 H12  | 256.07  | 1.421 | 257.077 | Invalid mass | No results    | No results | 47179110.32 | 71819828    | 31724858.77 |
| Com_2184_pos | Thromboxane                | C20 H36  | 394.233 | 6.083 | 395.241 | Invalid mass | Invalid mass  | No results | 76790868.68 | 67977808.97 | 92738685.54 |
| Com_2188_pos | ACar 18:1                  | C25 H48  | 425.35  | 7.59  | 426.357 | No results   | Invalid mass  | No results | 47946343.58 | 8148108.877 | 51892434.4  |
| Com_2227_pos | Methyl linole              | C19 H34  | 294.256 | 9.144 | 295.263 | No results   | Full match    | No results | 81679231.06 | 24426094.87 | 14670097.35 |
| Com_2245_pos | 6-(4-phenylpi              | C16 H24  | 276.184 | 4.643 | 277.191 | Full match   | No results    | No results | 8496046.667 | 105475463.4 | 8104311.334 |
| Com_2265_pos | Pregnanetriol              | C21 H36  | 358.25  | 6.323 | 359.258 | No results   | Invalid mass  | No results | 25875567.33 | 63876606.6  | 110399839   |
| Com_2278_pos | WKK                        | C23 H36  | 230.138 | 4.831 | 231.145 | Invalid mass | No results    | No results | 79699620.78 | 59627613    | 57347438.6  |
| Com_2302_pos | Desoxycortone              | C21 H30  | 330.219 | 6.463 | 331.226 | Full match   | Not the top h | Full match | 32893968.83 | 73452642.48 | 50054543.64 |
| Com_2304_pos | 4-oxo-4-(1- $\pi$          | C12 H13  | 236.115 | 5.057 | 237.123 | Invalid mass | No results    | No results | 14365651.82 | 14303090.14 | 6802108.566 |
| Com_2445_pos | 4-(3,4-dimeth              | C12 H15  | 251.127 | 5.027 | 252.135 | Invalid mass | No results    | No results | 73089263.31 | 65199442.46 | 66652861.57 |
| Com_2497_pos | N-Acetyl-L-ty              | C11 H13  | 223.084 | 4.998 | 224.092 | Full match   | Not the top h | Full match | 71166460.41 | 77910949.84 | 26718429.66 |
| Com_2501_pos | 8-(1,2-dihydr              | C15 H16  | 298.084 | 5.609 | 299.091 | Invalid mass | No results    | No results | 70378521.29 | 92641271.94 | 88203071.27 |
| Com_2532_pos | LLK                        | C18 H36  | 372.274 | 5.21  | 373.281 | Full match   | No results    | No results | 33489762.26 | 16710606.22 | 7894526.733 |
| Com_2561_pos | JNJ-1661010                | C19 H19  | 365.133 | 1.394 | 366.141 | No results   | No results    | Full match | 59755724.57 | 49284111.93 | 45723198.44 |
| Com_2563_pos | Levalbuterol               | C13 H21  | 261.133 | 1.288 | 262.14  | Invalid mass | No results    | No results | 26163632.35 | 19949044.67 | 12098438.01 |
| Com_2567_pos | Jasmone                    | C11 H16  | 164.12  | 6.284 | 165.127 | Full match   | No results    | No results | 56525165.29 | 90050537.77 | 55965870.57 |
| Com_2598_pos | 1,2-dihydroxy              | C19 H34  | 308.235 | 7.976 | 309.242 | Invalid mass | Invalid mass  | No results | 67599855.61 | 41584457.04 | 29675851.7  |
| Com_2610_pos | 2-[[4,5-dime               | C17 H18  | 330.121 | 5.391 | 331.129 | Full match   | No results    | No results | 67147435.32 | 50649065.09 | 60744881.02 |
| Com_2611_pos | NPK                        | C15 H27  | 339.19  | 4.845 | 340.198 | Invalid mass | No results    | No results | 50424487.02 | 35971661.28 | 10652990.63 |
| Com_2613_pos | 4,6-dimethyl-              | C20 H17  | 315.143 | 1.42  | 316.151 | Invalid mass | No results    | No results | 67076576.99 | 57109636.8  | 39718901.58 |
| Com_2633_pos | 17 $\alpha$ -Hydroxy $\pi$ | C21 H30  | 330.215 | 5.138 | 331.222 | Invalid mass | No results    | No results | 49192209.34 | 75129361.71 | 37407582.51 |
| Com_2667_pos | 6 $\beta$ -Naltrexol       | C20 H25  | 343.174 | 4.923 | 344.181 | Invalid mass | Invalid mass  | No results | 17619747.99 | 7172441.953 | 5839182.469 |
| Com_2674_pos | Acetylcarniti              | C9 H17 N | 203.116 | 5.115 | 204.123 | No results   | No results    | Full match | 41772232.98 | 61679411.57 | 37901495    |
| Com_2707_pos | 4-oxo-5-pheny              | C11 H12  | 174.068 | 5.482 | 175.076 | Invalid mass | No results    | No results | 7805727.388 | 11742160.7  | 8182545.665 |
| Com_2729_pos | jwh-018-d11                | C24 H12  | 352.24  | 8.16  | 353.248 | Invalid mass | No results    | No results | 1175339.699 | 53990148.63 | 20267850.42 |
| Com_2742_pos | LPC 15:1                   | C23 H46  | 479.303 | 6.655 | 480.312 | No results   | Full match    | Full match | 30885300.32 | 62941250.18 | 54013320.01 |
| Com_2768_pos | 2-(3,4-dihydr              | C8 H9 N  | 167.058 | 5.085 | 168.066 | Full match   | No results    | No results | 62053854.52 | 55775359.37 | 72529818.73 |
| Com_2789_pos | 2,4-dihydroxy              | C19 H36  | 350.246 | 7.824 | 351.253 | Invalid mass | No match      | No match   | 16604649.38 | 17987348.5  | 58261448.98 |
| Com_2798_pos | Testosterone               | C19 H28  | 288.208 | 6.749 | 289.216 | No results   | Full match    | Full match | 26076426.59 | 32242343.64 | 61696951.84 |
| Com_2803_pos | 1-Methylxanth              | C6 H6 N4 | 166.049 | 4.88  | 167.056 | Full match   | No results    | Full match | 1825529.97  | 2096463.583 | 2347722.15  |
| Com_2804_pos | 1-(3-ethyl-2,              | C13 H18  | 238.12  | 5.797 | 239.128 | Full match   | No results    | No results | 61167615.86 | 47800915.15 | 61173998.96 |
| Com_2830_pos | ACar 18:2                  | C25 H46  | 423.334 | 7.229 | 424.341 | No results   | Invalid mass  | No results | 21913651.91 | 22719894.89 | 21321078.33 |
| Com_2833_pos | Isoquinoline               | C9 H7 N  | 129.058 | 5.881 | 130.065 | Full match   | No results    | No results | 23571979.08 | 55679909.4  | 49117102.21 |
| Com_2877_pos | 1-(2-chloroph              | C16 H15  | 344.072 | 1.506 | 345.079 | Invalid mass | No results    | No results | 13681152.71 | 77363182.27 | 29206534.82 |
| Com_2912_pos | 3-pentadecyl-              | C22 H38  | 362.293 | 6.26  | 363.3   | Full match   | No results    | No results | 11659266.55 | 70319861.94 | 42281712.6  |
| Com_2966_pos | 2-[(3S)-1-(2-              | C18 H17  | 312.111 | 5.384 | 313.118 | Full match   | No results    | No results | 57096329.34 | 42661665.95 | 53091781.7  |
| Com_2970_pos | ACar 16:1                  | C23 H44  | 397.319 | 7.056 | 398.326 | No results   | Invalid mass  | No results | 6308635.744 | 14415785.08 | 8955016.21  |
| Com_3013_pos | 6-(3-hydroxyt              | C11 H16  | 210.089 | 5.738 | 211.096 | Invalid mass | No match      | No results | 21620907.77 | 21775620.23 | 16952954.01 |
| Com_3032_pos | Veratramine                | C27 H39  | 409.294 | 5.898 | 410.301 | Invalid mass | No results    | No results | 55750368.51 | 58415302.9  | 39537912.24 |
| Com_3035_pos | NKK                        | C16 H32  | 370.233 | 5.864 | 371.241 | Invalid mass | No results    | No results | 23482998.32 | 11880496.01 | 55882080.45 |
| Com_3052_pos | 4-(allyloxy)-              | C12 H11  | 201.079 | 5.27  | 202.086 | Full match   | No results    | No results | 17841223.62 | 34643166.01 | 29469989.81 |

|              |                     |          |         |       |         |              |               |            |             |             |             |
|--------------|---------------------|----------|---------|-------|---------|--------------|---------------|------------|-------------|-------------|-------------|
| Com_3075_pos | 11-Deoxy pros       | C20 H36  | 322.25  | 6.415 | 323.257 | Invalid mass | Invalid mass  | No results | 40795277.33 | 71816460.08 | 39287963.98 |
| Com_3102_pos | PC (2:0/13:1)       | C23 H44  | 511.29  | 5.961 | 512.3   | No results   | Invalid mass  | No results | 54237011.4  | 4826072.095 | 3747078.956 |
| Com_3111_pos | SPH                 | C14 H21  | 321.143 | 1.417 | 322.15  | Invalid mass | No results    | No results | 54016127.75 | 37876235.41 | 37580503.03 |
| Com_3131_pos | GLK                 | C14 H28  | 316.212 | 1.418 | 317.219 | Full match   | No results    | No results | 22362962.37 | 18866905.57 | 12256351.24 |
| Com_3168_pos | Docosahexaenc       | C24 H37  | 371.282 | 9.158 | 372.29  | Full match   | No results    | No results | 52927202.92 | 26411102.19 | 22524535.96 |
| Com_3174_pos | Hecogenin           | C27 H42  | 430.306 | 6.648 | 431.314 | No results   | Full match    | No results | 14263958.83 | 15936600.53 | 9637922.411 |
| Com_3204_pos | 2-(2-hydroxy-       | C11 H21  | 231.147 | 5.531 | 232.154 | Full match   | No results    | Full match | 52270392.53 | 50244563.92 | 52796677.06 |
| Com_3215_pos | Lagochilin          | C20 H36  | 356.262 | 9.149 | 357.269 | No results   | Invalid mass  | No results | 941556.2114 | 67701689.81 | 9605895.146 |
| Com_3246_pos | (1E)-5-hydrox       | C19 H20  | 302.126 | 5.803 | 303.133 | Invalid mass | No results    | No results | 29277151.84 | 20106692.55 | 24350968.65 |
| Com_3262_pos | 3-(4-hydroxy-       | C10 H12  | 178.063 | 5.368 | 179.07  | Invalid mass | No match      | No match   | 34676767.43 | 49483626.51 | 47668707.71 |
| Com_3277_pos | IRH                 | C18 H32  | 446.243 | 7.31  | 447.251 | Invalid mass | No results    | No results | 3336658.956 | 16453441.75 | 4386442.481 |
| Com_3297_pos | 3-(4-fluoroph       | C13 H16  | 269.09  | 1.423 | 270.097 | Full match   | No results    | No results | 50360409.37 | 39626081.65 | 30528855.42 |
| Com_3299_pos | Citrinin            | C13 H14  | 250.084 | 5.485 | 251.091 | No results   | Full match    | No results | 21224876.36 | 21882250.39 | 19668361.72 |
| Com_3306_pos | Methyl cinnan       | C10 H10  | 162.068 | 5.411 | 163.075 | No results   | Full match    | No results | 29570037.86 | 29639181.91 | 77448222.52 |
| Com_3309_pos | TLK                 | C16 H32  | 360.237 | 4.771 | 361.245 | Full match   | No results    | No results | 10551831.24 | 12681709.63 | 4012131.887 |
| Com_3310_pos | 2-[[3-(2,3,4,       | C19 H26  | 286.193 | 6.797 | 287.2   | Full match   | Partial match | Full match | 15342822.98 | 21059567.14 | 21909778.07 |
| Com_3312_pos | L-Hydroxyprol       | C5 H9 N  | 131.059 | 1.418 | 132.066 | No results   | No results    | Full match | 38902455.6  | 45367900.76 | 34184411.34 |
| Com_3343_pos | L-Histidinol        | C6 H11 N | 141.09  | 2.616 | 142.098 | No results   | No results    | Full match | 49602714.35 | 34243653.15 | 28426720.42 |
| Com_3364_pos | $\alpha$ -Estradiol | C18 H24  | 272.174 | 5.259 | 273.181 | Invalid mass | No results    | No results | 49156542.83 | 40343835.03 | 39251923.09 |
| Com_3370_pos | Nicotinamide        | C6 H6 N2 | 138.042 | 1.432 | 294.118 | No results   | No results    | Full match | 16353133.31 | 28581247.88 | 10299869.95 |
| Com_3417_pos | Diosgenin           | C27 H42  | 396.302 | 6.888 | 397.31  | No results   | Invalid mass  | No results | 10904592.36 | 31997317.2  | 13351965.48 |
| Com_3448_pos | Cyclohexyl fe       | C26 H29  | 395.303 | 6.764 | 396.31  | Invalid mass | Invalid mass  | No results | 10289352.29 | 21904826.46 | 12930771.29 |
| Com_3478_pos | 1,7-Diphenyl        | C19 H20  | 247.121 | 5.642 | 248.128 | No results   | Invalid mass  | No results | 32093568.82 | 7160242.688 | 19032594.77 |
| Com_3501_pos | Avocadyne 1-a       | C19 H34  | 348.228 | 7.651 | 349.235 | Invalid mass | Invalid mass  | No results | 46976172.49 | 33075809.97 | 17060900    |
| Com_3512_pos | Mupirocin           | C26 H44  | 522.28  | 6.691 | 523.287 | Invalid mass | No results    | No results | 1988974.881 | 3291381.03  | 2886994.251 |
| Com_3545_pos | Lysope 14:0         | C19 H40  | 425.255 | 7.147 | 426.264 | No results   | No results    | Full match | 18255129.82 | 8004067.511 | 71497447.97 |
| Com_3579_pos | 5-Fluoro-2-[(       | C19 H20  | 309.169 | 4.963 | 310.176 | Invalid mass | No results    | No results | 45628950.63 | 35251500.07 | 26832696.68 |
| Com_3621_pos | 5-phenyl-2,3-       | C15 H12  | 258.075 | 5.36  | 259.083 | Invalid mass | No results    | No results | 22743543.86 | 40345187.88 | 59242808    |
| Com_3633_pos | 4-methyl-5-ox       | C11 H16  | 212.105 | 5.546 | 213.112 | Full match   | No results    | No results | 42403470.36 | 51157330.2  | 55143116.78 |
| Com_3637_pos | Prostaglandir       | C20 H30  | 332.198 | 6.853 | 333.205 | Invalid mass | Unused        | No results | 44654200.56 | 44968239.6  | 33000541.7  |
| Com_3718_pos | N-(1-benzyl-4       | C22 H24  | 360.19  | 5.003 | 361.197 | Invalid mass | No results    | No results | 17040706.42 | 9985654.35  | 8467782.845 |
| Com_3722_pos | methyl 2-[(2-       | C9 H13 N | 199.084 | 4.978 | 200.092 | Full match   | No results    | No results | 37795360.24 | 56537532.82 | 44365089.52 |
| Com_3723_pos | LNH                 | C16 H26  | 382.197 | 5.798 | 383.205 | Full match   | No results    | No results | 43338344.24 | 45663169.38 | 54621634.52 |
| Com_3743_pos | LNK                 | C16 H31  | 373.237 | 8.081 | 374.244 | Invalid mass | No results    | No results | 33872268.38 | 51955282.69 | 39634783.5  |
| Com_3766_pos | 7-(2-aminophe       | C13 H19  | 203.127 | 1.467 | 204.134 | Invalid mass | No results    | No results | 9635799.071 | 28889512.53 | 7327280.094 |
| Com_3775_pos | DL-2-(acetyl        | C11 H13  | 224.116 | 1.326 | 225.124 | Invalid mass | No results    | No results | 42702421.6  | 30824410.57 | 16919001.69 |
| Com_3782_pos | 2-(2'-fluoro[       | C22 H18  | 331.138 | 1.418 | 332.145 | Full match   | Invalid mass  | No results | 42638352.53 | 36120693.59 | 35297566.76 |
| Com_3787_pos | N-(2,3-dihydr       | C15 H15  | 273.1   | 5.438 | 274.107 | Full match   | Partial match | No results | 42584579.65 | 44905511.43 | 45342031.17 |
| Com_3814_pos | 1-morpholino-       | C13 H18  | 282.122 | 5.067 | 283.129 | Full match   | No results    | No results | 42241826.37 | 28885376.11 | 40804620.37 |
| Com_3827_pos | 2-Methylbutyr       | C12 H23  | 245.163 | 5.202 | 246.17  | No results   | No results    | Full match | 7326933.064 | 11562397.09 | 4768370.515 |
| Com_3831_pos | Sinapinic aci       | C11 H12  | 206.058 | 5.879 | 207.065 | No results   | Invalid mass  | No results | 42030839.19 | 44791822.13 | 38285395.19 |
| Com_3832_pos | 1H-indene-3-c       | C10 H9 N | 181.049 | 1.417 | 182.056 | Invalid mass | No results    | No results | 42013250.59 | 36868215.24 | 34192972.76 |
| Com_3842_pos | 3-N-Methyl-L-       | C7 H13 N | 187.096 | 1.249 | 188.103 | No results   | No results    | Full match | 41891461.55 | 4342499.941 | 31676107.47 |
| Com_3870_pos | 5,8-dihydroxy       | C10 H14  | 238.084 | 5.376 | 239.09  | Invalid mass | No results    | No results | 3956820.322 | 5320726.43  | 4754876.403 |
| Com_3872_pos | 1-Phenyl-3-me       | C10 H10  | 174.079 | 5.373 | 175.086 | Full match   | No results    | No results | 5904445.45  | 6989933.66  | 3983165.523 |
| Com_3875_pos | Isoproterenol       | C11 H17  | 211.121 | 1.436 | 212.128 | No results   | No results    | Full match | 10734312.13 | 13107494.08 | 7018218.36  |
| Com_3905_pos | o-Veratraldeh       | C9 H10 O | 166.063 | 5.236 | 167.07  | No results   | Full match    | Full match | 6359446.663 | 7315851.284 | 7046102.894 |
| Com_3911_pos | 4-Butylresorc       | C10 H14  | 166.099 | 8.122 | 167.106 | No results   | No results    | Full match | 13358486.51 | 16370721.79 | 22128320.06 |
| Com_3914_pos | SLK                 | C15 H30  | 311.185 | 1.416 | 312.192 | Invalid mass | No results    | No results | 16520102.59 | 40933987.72 | 12620940.72 |
| Com_3948_pos | Boldione            | C19 H24  | 284.177 | 6.704 | 285.184 | No results   | No results    | Full match | 16532879.24 | 31458887.06 | 30880071.13 |
| Com_3954_pos | N6,N6,N6-Trin       | C9 H20 N | 188.153 | 1.219 | 189.16  | No results   | Full match    | No results | 17455023.65 | 23915777.24 | 16884709.33 |
| Com_3955_pos | RQH                 | C17 H29  | 461.213 | 1.413 | 462.22  | Invalid mass | No results    | No results | 15710434.2  | 19221951.33 | 19521716.04 |
| Com_3957_pos | 3-hydroxy-2-[(      | C14 H17  | 275.127 | 4.978 | 276.134 | Full match   | No results    | Full match | 40377093.87 | 37670132.21 | 40774867.32 |
| Com_3961_pos | Fraxinellone        | C14 H16  | 232.11  | 5.57  | 233.117 | No results   | Full match    | No results | 33577766.42 | 18222029.02 | 20123184.15 |

|              |                  |          |         |        |         |              |               |            |             |             |             |
|--------------|------------------|----------|---------|--------|---------|--------------|---------------|------------|-------------|-------------|-------------|
| Com_3989_pos | N1-isopropyl-C16 | H17      | 271.103 | 4.852  | 272.11  | Full match   | No results    | No results | 9911388.104 | 3913207.407 | 3740577.47  |
| Com_4019_pos | 1-benzyl-4-(2    | C19 H23  | 362.147 | 5.48   | 363.155 | Full match   | No results    | No results | 39459814.36 | 36589361.44 | 44162854.4  |
| Com_4045_pos | Palmitoylcarr    | C23 H45  | 399.334 | 7.423  | 400.342 | No results   | Full match    | Full match | 10914899.62 | 10527801.44 | 7324180.81  |
| Com_4050_pos | 2-Methoxyestr    | C19 H24  | 300.172 | 6.694  | 301.179 | No results   | Full match    | Full match | 21986688.1  | 30306948.31 | 25260997.14 |
| Com_4113_pos | 4-phenoxypher    | C18 H19  | 313.128 | 1.303  | 314.135 | Invalid mass | No results    | No results | 38333672.99 | 21095201.48 | 7444212.411 |
| Com_4123_pos | 11-Oxoetiochc    | C19 H28  | 286.193 | 5.865  | 287.2   | No results   | Invalid mass  | No match   | 28035803.46 | 39352613.26 | 41926528.39 |
| Com_4138_pos | (1E,4E)-1,5-t    | C19 H18  | 311.148 | 1.427  | 312.156 | Invalid mass | No results    | No results | 38118622.78 | 34225778.23 | 26090496.23 |
| Com_4168_pos | 5-(tert-butyl    | C14 H18  | 284.112 | 1.396  | 307.102 | Invalid mass | No results    | No results | 29725941.89 | 49321435.75 | 38146714.22 |
| Com_4209_pos | (3R)-8-hydrox    | C16 H14  | 252.079 | 5.814  | 253.086 | Invalid mass | No results    | No results | 16375035.65 | 12311316.74 | 8113751.29  |
| Com_4226_pos | Dihydroartemi    | C15 H24  | 236.177 | 8.119  | 237.184 | No results   | Full match    | No results | 12857693.93 | 13763719.11 | 17196992.32 |
| Com_4234_pos | PC (14:0e/3:C    | C25 H52  | 509.348 | 9.908  | 510.355 | No results   | Full match    | Full match | 20197312.8  | 7179559.6   | 3487456.966 |
| Com_4281_pos | 5,6-dimethyl-    | C8 H8 O4 | 186.051 | 1.203  | 187.058 | Invalid mass | Invalid mass  | No results | 27513741.59 | 30646081.49 | 40924678.68 |
| Com_4283_pos | 1,1-Dimethyl-    | C13 H18  | 250.131 | 4.89   | 251.139 | No results   | Full match    | No results | 36241571.89 | 34925518.31 | 40700282.39 |
| Com_4289_pos | Nicotinic aci    | C11 H14  | 335.041 | 1.421  | 336.048 | No results   | Full match    | No results | 1363373.208 | 1341690.622 | 1209355.047 |
| Com_4292_pos | DLK              | C16 H30  | 374.216 | 5.023  | 375.224 | Full match   | No results    | No results | 7879078.244 | 7731669.932 | 5382623.756 |
| Com_4318_pos | S-Adenosyl-me    | C15 H22  | 398.138 | 1.28   | 399.145 | No results   | Full match    | Full match | 4262939.94  | 5450488.587 | 2433831.42  |
| Com_4333_pos | N-[3-(1-methy    | C17 H16  | 292.128 | 5.994  | 293.135 | Invalid mass | Invalid mass  | No results | 322038.8742 | 320989.6857 | 297067.5891 |
| Com_4357_pos | Mag (18:1)       | C21 H40  | 356.293 | 9.425  | 357.301 | No results   | No results    | Full match | 2334497.188 | 8511418.885 | 2258192.177 |
| Com_4384_pos | SNK              | C13 H25  | 347.184 | 5.502  | 695.375 | Invalid mass | No results    | No results | 20104760.51 | 19523269.81 | 2845895.431 |
| Com_4400_pos | 5-[(8Z,11Z)-     | C21 H32  | 316.24  | 6.809  | 317.247 | Full match   | Partial match | Full match | 20950205.54 | 37098042.72 | 30509261.85 |
| Com_4408_pos | (2R,3S,4S,5R     | C14 H20  | 266.115 | 6.412  | 267.123 | Invalid mass | No results    | No results | 31729697.25 | 40235581.36 | 37272459.72 |
| Com_4415_pos | 3-hydroxy-N-(    | C18 H27  | 359.143 | 1.352  | 360.151 | Invalid mass | Invalid mass  | No results | 13480921.78 | 26420766.27 | 28931365.78 |
| Com_4416_pos | Ergosterol pe    | C28 H44  | 428.329 | 6.824  | 429.338 | No results   | Full match    | No results | 24928241.29 | 35349301.97 | 32425985.64 |
| Com_4423_pos | Prostaglandir    | C20 H32  | 336.227 | 7.365  | 337.234 | No results   | Invalid mass  | No results | 34888784.87 | 34280088.04 | 42186356.97 |
| Com_4438_pos | 2-morpholino-    | C12 H17  | 207.126 | 5.033  | 208.133 | Full match   | Partial match | No results | 31912019.04 | 21709674.21 | 24273833.56 |
| Com_4483_pos | Glu-Val-Phe      | C19 H27  | 393.189 | 5.525  | 394.196 | No results   | Full match    | No results | 16989429.86 | 21145781.05 | 7513211.792 |
| Com_4503_pos | 17beta-Trenbc    | C18 H22  | 270.158 | 5.583  | 271.165 | Invalid mass | Invalid mass  | No results | 21310203.96 | 40043968.24 | 18531320.27 |
| Com_4518_pos | 6-Methoxy-2-r    | C12 H10  | 202.063 | 5.474  | 203.07  | No results   | No results    | Full match | 6812507.809 | 9864863.157 | 7361246.057 |
| Com_4565_pos | Hydroxyproges    | C27 H40  | 428.292 | 8.381  | 429.299 | No results   | Full match    | No results | 33422850.69 | 28287785.63 | 15669901.35 |
| Com_4569_pos | 5-OxoETE         | C20 H30  | 318.215 | 5.288  | 319.222 | Invalid mass | No results    | No results | 20839879.93 | 15541026.41 | 15053154.05 |
| Com_4578_pos | RKK              | C18 H38  | 412.297 | 6.189  | 413.304 | Invalid mass | No results    | No results | 22964145.08 | 31463759.13 | 30855913.16 |
| Com_4638_pos | Asaraldehyde     | C10 H12  | 196.073 | 5.287  | 197.08  | No results   | No results    | Full match | 22127043.92 | 11710991.67 | 20875440.99 |
| Com_4643_pos | 2,6-Di-tert-t    | C14 H20  | 220.146 | 7.311  | 221.153 | No results   | Full match    | No results | 16303491.5  | 19451534.45 | 22252673.86 |
| Com_4672_pos | 4-acetyl-4-(e    | C12 H18  | 274.103 | 5.149  | 275.11  | Invalid mass | No results    | No results | 3102840.664 | 3533229.219 | 3538927.478 |
| Com_4755_pos | N,5-diphenyl-    | C15 H11  | 287.062 | 1.348  | 288.07  | Invalid mass | No results    | No results | 3047810.477 | 8153755.996 | 4359563.21  |
| Com_4775_pos | Pyrrole-2-car    | C5 H5 N  | 111.03  | 1.249  | 112.037 | No results   | Invalid mass  | No results | 15112602.64 | 10121758.91 | 14342017.5  |
| Com_4794_pos | Flavin mononu    | C17 H21  | 456.104 | 5.39   | 457.112 | No results   | Full match    | Full match | 5022596.102 | 3250572.107 | 3352955.612 |
| Com_4810_pos | 2-ethyl-2-(3-    | C15 H21  | 247.157 | 5.134  | 248.165 | Full match   | No results    | No results | 30923861.01 | 22511903.3  | 28412332.1  |
| Com_4819_pos | 1-[(3,5-dimet    | C10 H16  | 244.088 | 5.38   | 245.095 | Full match   | Partial match | Full match | 30830695.6  | 22749441.29 | 28680195.25 |
| Com_4883_pos | 1,4-dihydroxy    | C15 H24  | 118.099 | 1.393  | 275.16  | Invalid mass | No results    | No results | 30282345.41 | 26314724.75 | 21267522.11 |
| Com_4943_pos | 2-(2-acetyl-3    | C10 H10  | 210.053 | 5.354  | 211.06  | Full match   | No results    | Full match | 10671483.7  | 14346524.16 | 9126057.629 |
| Com_4962_pos | DL-3,4-Dihydr    | C8 H10 O | 170.058 | 5.181  | 171.066 | No results   | No results    | Full match | 29685495.25 | 5865154.644 | 7948013.852 |
| Com_4971_pos | Ecgonine         | C9 H15 N | 185.105 | 5.115  | 186.112 | No results   | Full match    | No results | 15207888.79 | 26394418.97 | 15112816.84 |
| Com_5054_pos | 2,3-dihydroxy    | C17 H34  | 284.235 | 8.15   | 285.242 | Invalid mass | No results    | No results | 7907798.377 | 37667435.78 | 4357079.799 |
| Com_5073_pos | 1-(4-hydroxyr    | C9 H12 O | 150.068 | 10.346 | 151.075 | Invalid mass | No match      | No match   | 15059177.51 | 10221700.37 | 11170588.34 |
| Com_5112_pos | (3beta,9xi)-3    | C29 H44  | 518.287 | 5.993  | 519.296 | Invalid mass | No results    | No results | 20852260.24 | 30906406.56 | 29749846.14 |
| Com_5119_pos | RNH              | C16 H27  | 409.239 | 4.909  | 410.247 | Invalid mass | No results    | No results | 3221235.263 | 7607735.155 | 4235811.268 |
| Com_5123_pos | Biliverdin       | C33 H34  | 582.247 | 6.306  | 583.254 | No results   | Full match    | No results | 13965343.48 | 18190357.09 | 6355068.399 |
| Com_5134_pos | Stiripentol      | C14 H18  | 216.115 | 5.729  | 217.122 | Invalid mass | No results    | No results | 14841888.71 | 15066763.84 | 14971842.17 |
| Com_5168_pos | H-Trp-NH2        | C11 H13  | 203.105 | 5.201  | 204.113 | No results   | No results    | Full match | 13154916.67 | 10663692.9  | 12483498.36 |
| Com_5197_pos | 1-allyl-4,5-c    | C22 H18  | 342.123 | 5.456  | 343.13  | Invalid mass | No results    | No results | 317045.8249 | 2948655.281 | 2867725.432 |
| Com_5224_pos | DPK              | C15 H26  | 358.189 | 5.772  | 359.196 | Invalid mass | No results    | No results | 27549209.15 | 19884132.62 | 20106107.91 |
| Com_5260_pos | MMK              | C16 H32  | 390.175 | 1.314  | 391.182 | Invalid mass | No results    | No results | 12484518.77 | 11517703.99 | 3401617.319 |
| Com_5270_pos | 17alpha-Hydr     | C21 H30  | 330.219 | 6.352  | 331.226 | Full match   | Partial match | Full match | 6902724.603 | 11011209.57 | 6732510.24  |

|              |                                                     |          |         |       |         |              |                 |            |             |             |             |
|--------------|-----------------------------------------------------|----------|---------|-------|---------|--------------|-----------------|------------|-------------|-------------|-------------|
| Com_5334_pos | Clareolide                                          | C16 H26  | 250.193 | 6.384 | 251.2   | No results   | Full match      | No results | 26766727.21 | 20209682.48 | 14805373.99 |
| Com_5400_pos | 2-[5-(2-hydroxycyclohexyl)oxy]ethyl acetate         | C10 H18  | 240.078 | 5.476 | 241.085 | Invalid mass | No results      | No results | 8742048.648 | 8063433.139 | 17108404.82 |
| Com_5423_pos | Sunitinib                                           | C22 H27  | 199.103 | 5.36  | 200.11  | Invalid mass | No results      | No results | 26150600.83 | 31968694.52 | 29047325.98 |
| Com_5465_pos | Ala-trp                                             | C14 H17  | 275.127 | 5.198 | 276.134 | No results   | No results      | Full match | 15520144.61 | 12607324.67 | 8519892.747 |
| Com_5502_pos | 3-hydroxy-2-(1-phenylethoxy)propanoic acid          | C15 H19  | 311.127 | 5.867 | 312.134 | Invalid mass | No results      | No results | 25537808.02 | 22284994.59 | 21392326.42 |
| Com_5512_pos | 1-(4-methoxyphenyl)ethanone                         | C10 H14  | 164.084 | 6.959 | 165.091 | Invalid mass | No match        | No match   | 9114381.162 | 23156735    | 12953504.61 |
| Com_5547_pos | N-Acetyl-DL-tryptophan                              | C11 H13  | 207.091 | 5.373 | 437.17  | No results   | No results      | Full match | 25191788.1  | 30954705.1  | 28060038.31 |
| Com_5549_pos | 2-phenyl-4H-pyridin-5(1H)-one                       | C17 H10  | 262.066 | 1.302 | 263.073 | Invalid mass | No results      | No results | 25174044.58 | 19493031.42 | 22978451.9  |
| Com_5557_pos | ALK                                                 | C15 H30  | 352.211 | 5.147 | 353.218 | Invalid mass | No results      | No results | 12975507.98 | 18851649.83 | 5417581.881 |
| Com_5560_pos | TNK                                                 | C14 H27  | 343.186 | 4.789 | 344.193 | Invalid mass | No results      | No results | 25108223.78 | 8636319.51  | 3651807.911 |
| Com_5588_pos | 6-methyl-7-nicotinamide                             | C9 H9 N  | 195.053 | 5.058 | 196.061 | Full match   | No results      | No results | 24118507.39 | 28211326.02 | 21850156.62 |
| Com_5613_pos | Monolaurin                                          | C15 H30  | 256.204 | 7.473 | 257.211 | Invalid mass | No results      | No results | 2451947.568 | 32291758.82 | 4341153.859 |
| Com_5684_pos | 1-hydroxy-1-(1-phenylethoxy)ethane                  | C18 H20  | 338.115 | 6.358 | 339.123 | Invalid mass | No results      | No results | 24258077.6  | 18343926.44 | 20348443.29 |
| Com_5724_pos | 2-(2,6-dimethylphenyl)ethane-1-thiol                | C19 H18  | 324.099 | 5.498 | 325.106 | Invalid mass | No results      | No results | 22226819.77 | 17312259.33 | 22655895.72 |
| Com_5763_pos | 4-Guanidinobutyric acid                             | C5 H11 N | 145.085 | 1.427 | 146.092 | No results   | No results      | Full match | 23830649.5  | 21200460.66 | 20348492.07 |
| Com_5781_pos | YKK                                                 | C21 H35  | 419.253 | 5.115 | 420.261 | Invalid mass | No results      | No results | 23701472.89 | 20949031.89 | 22852758.47 |
| Com_5805_pos | All-Trans-1,3-bis(sn)-phosphatidylglycerol          | C20 H32  | 288.245 | 6.044 | 289.252 | No results   | No results      | Full match | 16988142.03 | 25303216.79 | 9244589.996 |
| Com_5883_pos | Adipamide                                           | C6 H12 N | 144.09  | 1.276 | 145.097 | No results   | No results      | Full match | 7857016.035 | 5468774.843 | 4009387.901 |
| Com_5889_pos | VMK                                                 | C16 H32  | 358.204 | 5.124 | 359.212 | Invalid mass | No results      | No results | 4708739.536 | 2776755.984 | 2272675.361 |
| Com_5894_pos | (2R)-5-hydroxycyclohexanone                         | C6 H14   | 116.067 | 5.819 | 117.074 | Invalid mass | Invalid mass    | No results | 12211566.35 | 8538154.025 | 6408837.446 |
| Com_5896_pos | 2-(3,5-dichlorophenyl)ethane-1-thiol                | C11 H10  | 256.02  | 1.274 | 257.028 | Invalid mass | No results      | No results | 10257387.57 | 19644826.39 | 25871167.09 |
| Com_5935_pos | LysoPE 18:2                                         | C23 H44  | 477.286 | 6.039 | 478.293 | No results   | No results      | Full match | 22879552.89 | 10647083.39 | 8246666.57  |
| Com_5992_pos | PC (16:2e/4:C28 H54                                 | C28 H54  | 547.363 | 9.956 | 548.37  | No results   | Full match      | Full match | 15879654.71 | 4219595.279 | 3761179.364 |
| Com_6025_pos | Midazolam-d4                                        | C18 H9 N | 329.102 | 5.664 | 330.109 | Full match   | No results      | No results | 3607680.143 | 3861299.642 | 2835090.027 |
| Com_6047_pos | 15(R)-15-Methyl-15-oxo-1,5-dihydro-2H-pyridin-2-one | C21 H32  | 330.218 | 5.562 | 331.225 | No results   | Invalid mass    | No results | 22201818.94 | 20390747.24 | 14086767.71 |
| Com_6067_pos | GPK                                                 | C13 H24  | 322.164 | 5.016 | 323.171 | Invalid mass | No results      | No results | 22080533.51 | 15402208.26 | 11497371.22 |
| Com_6178_pos | Octyl hydrogensulfate                               | C16 H22  | 278.15  | 6.717 | 279.157 | Invalid mass | Invalid mass    | No results | 13466806.07 | 17488357.68 | 33226505.03 |
| Com_6183_pos | 2-Naphthol                                          | C10 H8 O | 144.057 | 5.565 | 145.065 | No results   | No results      | Full match | 16434871.53 | 20595444.19 | 27684457.04 |
| Com_6285_pos | Sphingosine                                         | C18 H37  | 321.266 | 7.372 | 322.274 | Invalid mass | No match        | No results | 17789447.67 | 27399262.43 | 10020459.56 |
| Com_6307_pos | Tryptophanol                                        | C11 H14  | 190.111 | 5.152 | 191.118 | No results   | No results      | Full match | 13859136.16 | 10995353.5  | 17422841.05 |
| Com_6358_pos | VQH                                                 | C16 H26  | 404.18  | 6.427 | 405.188 | Invalid mass | No results      | No results | 834128.4489 | 825466.2833 | 203182.9831 |
| Com_6490_pos | MLK                                                 | C17 H34  | 373.21  | 5.231 | 391.244 | Invalid mass | No results      | No results | 20045076    | 16612803.53 | 18822480.23 |
| Com_6658_pos | 1-adamantyl-1-ol                                    | C16 H25  | 269.174 | 4.917 | 270.181 | Invalid mass | No results      | No results | 19286766.26 | 18125900.23 | 5280630.262 |
| Com_6661_pos | 4-Hydroxybenzoic acid                               | C7 H6 O3 | 156.04  | 1.196 | 157.047 | No results   | Invalid mass    | No results | 13986879.56 | 17639950.94 | 25642894.26 |
| Com_6871_pos | 2-(4-(trifluoromethyl)phenyl)ethane-1-thiol         | C9 H9 F3 | 322.004 | 1.275 | 323.012 | Invalid mass | No results      | No results | 1959681.415 | 1080710.547 | 947907.6271 |
| Com_6933_pos | (+/-)-CP 47,4C21 H34                                | C34 H34  | 334.251 | 8.341 | 335.258 | No results   | Full match      | No results | 2262798.537 | 23630210.16 | 1233372.623 |
| Com_7002_pos | Lipoic acid                                         | C8 H14 O | 206.044 | 1.21  | 207.051 | No results   | No results      | Full match | 6910161.158 | 6195178.481 | 6396080.574 |
| Com_7033_pos | 2-benzyl-6-hydroxycyclohexanone                     | C14 H17  | 231.126 | 6.493 | 232.133 | Full match   | No results      | No results | 17691812.94 | 8906090.791 | 10120293.11 |
| Com_7051_pos | All trans-RetC20 H28                                | C20 H28  | 284.214 | 6.813 | 285.221 | No results   | No results      | Full match | 5808861.268 | 9694155.488 | 8065855.823 |
| Com_7066_pos | U-47700-d6                                          | C16 H16  | 334.153 | 5.072 | 335.16  | Invalid mass | No results      | No results | 17583672.28 | 8068535.943 | 17157362.65 |
| Com_7132_pos | ACar 12:0                                           | C19 H38  | 343.271 | 6.427 | 344.278 | No results   | Invalid mass    | No results | 974959.2738 | 3223108.959 | 1120405.04  |
| Com_7187_pos | 4-hydroxy-3-(1-phenylethoxy)butan-2-one             | C12 H14  | 206.094 | 6.52  | 207.101 | Full match   | Not the top hit | No results | 1217366.023 | 1262942.306 | 1218087.745 |
| Com_7189_pos | ACar 14:2                                           | C21 H38  | 367.271 | 6.417 | 368.279 | No results   | Invalid mass    | No results | 2239460.21  | 4129545.287 | 2237514.936 |
| Com_7200_pos | 1-(7-methoxyphenyl)ethane-1-thiol                   | C17 H18  | 340.094 | 5.659 | 341.101 | Invalid mass | No results      | No results | 11687871.97 | 9950986.652 | 17703822.14 |
| Com_7374_pos | bicyclo[2.2.2]nonane                                | C15 H18  | 278.101 | 1.412 | 279.108 | Invalid mass | No results      | No results | 16330154.33 | 18122648.81 | 8997562.173 |
| Com_7438_pos | KKK                                                 | C18 H38  | 384.285 | 6.103 | 385.292 | Invalid mass | No results      | No results | 16078382.01 | 7135466.139 | 19394008.11 |
| Com_7456_pos | Senkyunolide                                        | C12 H16  | 192.115 | 7.243 | 193.122 | No results   | Full match      | No results | 6681041.46  | 8744312.139 | 10507773.73 |
| Com_7589_pos | 4-[3-(3,4-dichlorophenyl)propyl]phenol              | C18 H22  | 151.074 | 4.93  | 152.081 | Invalid mass | No results      | No results | 5918063.932 | 12144957.56 | 5875256.698 |
| Com_7633_pos | alpha-Farnesene                                     | C15 H24  | 204.188 | 9.894 | 205.195 | No results   | No results      | Full match | 12813570.45 | 9906836.366 | 7352595.419 |
| Com_7639_pos | PC (18:3e/2:C28 H52                                 | C28 H52  | 545.348 | 9.428 | 546.357 | No results   | Full match      | No results | 5670939.896 | 7764867.694 | 12498526.13 |
| Com_7653_pos | 3-[4-(tert-butylphenyl)butyl]phenol                 | C18 H18  | 310.116 | 4.702 | 311.123 | Invalid mass | No results      | No results | 9964642.488 | 9687997.111 | 5978763.81  |
| Com_7748_pos | N1-(2-pyridyl)pyrrolidine                           | C12 H14  | 452.093 | 1.385 | 453.1   | Invalid mass | No results      | No results | 8596672.221 | 15893459.67 | 16302401.6  |
| Com_7764_pos | Meperidine-d5                                       | C15 H16  | 252.187 | 7.245 | 253.195 | Invalid mass | No results      | No results | 4364425.84  | 8699914.186 | 7476742.937 |
| Com_7808_pos | 3-Succinoylpyrrolidine                              | C9 H9 N  | 162.035 | 1.421 | 163.042 | No results   | Invalid mass    | No results | 1895721.224 | 1727908.995 | 1574017.884 |



|               |                       |           |         |       |         |              |              |            |             |             |             |
|---------------|-----------------------|-----------|---------|-------|---------|--------------|--------------|------------|-------------|-------------|-------------|
| Com_7832_pos  | 2-[1-oxophta          | C15 H12   | 338.014 | 1.278 | 339.021 | Invalid mass | No results   | No results | 2365216.102 | 3685403.295 | 7622478.185 |
| Com_7868_pos  | Simvastatin           | C25 H38   | 418.27  | 6.815 | 419.278 | No results   | Full match   | No results | 4243647.311 | 6685061.437 | 6570169.487 |
| Com_7879_pos  | 3-Acetyl-11-k         | C32 H48   | 512.349 | 7.286 | 513.357 | No results   | Full match   | No results | 14715444.71 | 12084565.07 | 14112270.27 |
| Com_7963_pos  | Tyr-Tyr               | C18 H20   | 344.137 | 4.988 | 345.145 | No results   | Full match   | No results | 3869497.76  | 3473617.061 | 1926924.293 |
| Com_7977_pos  | LysoPC 12:1           | C20 H36   | 433.224 | 5.217 | 456.213 | No results   | No results   | Full match | 1659523.971 | 5409279.236 | 814363.8613 |
| Com_8136_pos  | Gitogenin             | C27 H44   | 432.323 | 6.566 | 433.33  | No results   | Full match   | No results | 1608351.77  | 2548036.094 | 2940268.972 |
| Com_8151_pos  | 2-(3,4-dihydr         | C16 H12   | 316.058 | 5.878 | 317.065 | Full match   | No results   | No results | 1534062.155 | 2354311.04  | 477129.2491 |
| Com_8166_pos  | 8-Aminoocanc          | C8 H17 N  | 159.126 | 5.302 | 160.133 | No results   | No results   | Full match | 3140263.925 | 1937314.055 | 1648999.223 |
| Com_8243_pos  | 8-(2,3-dihydr         | C15 H18   | 316.076 | 1.289 | 317.083 | Invalid mass | No results   | No results | 3917537.274 | 1740464.68  | 4212945.071 |
| Com_8245_pos  | 0-Desmethylna         | C13 H12   | 216.079 | 5.597 | 217.086 | No results   | No results   | Full match | 4292693.279 | 7327031.491 | 9612436.978 |
| Com_8306_pos  | Cyclohexylsul         | C6 H13 N  | 179.062 | 1.414 | 180.07  | No results   | No results   | Full match | 826087.2818 | 895037.3045 | 1289451.084 |
| Com_8341_pos  | 4-(2,3-dihydr         | C14 H12   | 279.097 | 5.038 | 280.104 | Invalid mass | No results   | No results | 2254844.81  | 1832704.395 | 1082029.603 |
| Com_8358_pos  | N-(6-methoxyr         | C11 H10   | 234.05  | 1.223 | 235.057 | Invalid mass | No results   | No results | 5674493.528 | 4965961.451 | 3805492.985 |
| Com_8370_pos  | Hypotaurine           | C2 H7 N   | 109.02  | 1.285 | 110.027 | No results   | No results   | Full match | 3513614.81  | 633412.3917 | 550147.0596 |
| Com_8396_pos  | Rubescensin           | AC20 H28  | 364.188 | 6.424 | 365.195 | No results   | Full match   | No results | 3096569.993 | 2231974.807 | 2780951.357 |
| Com_8660_pos  | FLK                   | C21 H34   | 406.258 | 5.319 | 407.265 | Full match   | No results   | No results | 6639254.922 | 4844435.121 | 1892079.596 |
| Com_8671_pos  | Amlexanox             | C16 H14   | 298.094 | 5.638 | 299.102 | No results   | Full match   | No results | 3220775.517 | 3654809.276 | 1936511.458 |
| Com_8740_pos  | Dibutyl sebac         | C18 H34   | 314.245 | 7.779 | 315.252 | No results   | No results   | Full match | 12387728.31 | 8919090.707 | 7919690.541 |
| Com_8766_pos  | 7-(2-hydroxyr         | C15 H28   | 257.235 | 6.387 | 258.242 | Invalid mass | No results   | No results | 11357414.56 | 10715844.44 | 7436172.372 |
| Com_8830_pos  | Oxymatrine            | C15 H24   | 264.184 | 5.416 | 265.191 | No results   | Full match   | No results | 12216834.67 | 7914663.617 | 9859847.755 |
| Com_8877_pos  | 2,6-di[2-chlc         | C24 H26   | 428.144 | 5.789 | 429.152 | Invalid mass | No results   | No results | 485636.5069 | 633575.8885 | 381693.3801 |
| Com_8941_pos  | Dehydroepianc         | C19 H28   | 270.198 | 5.904 | 271.205 | No results   | Invalid mass | No results | 9277135.376 | 9392884.455 | 12446463.63 |
| Com_8952_pos  | 4,4'-Bis(3-me         | C20 H16   | 327.107 | 1.425 | 328.114 | Invalid mass | No results   | No results | 11955324.86 | 14117829.12 | 9711020.595 |
| Com_8955_pos  | 2-((2-oxo-2-          | C10 H16   | 260.089 | 1.424 | 261.096 | Invalid mass | No results   | No results | 11947159.66 | 12487716.04 | 15808464.51 |
| Com_8995_pos  | 6-benzyl-4-ox         | C13 H12   | 266.047 | 5.692 | 284.081 | Invalid mass | No results   | No results | 11852745    | 10499858.34 | 9751712.898 |
| Com_9102_pos  | 4-(3-methyl-1         | C21 H20   | 161.088 | 1.415 | 162.095 | Invalid mass | Invalid mass | No results | 11025052.95 | 8021667.884 | 11124876.7  |
| Com_9175_pos  | 1-adamantyl(1         | C15 H23   | 265.153 | 1.232 | 266.16  | Invalid mass | No results   | No results | 9979229.797 | 14998032.06 | 7025494.904 |
| Com_9218_pos  | Ethyl oleate          | C20 H38   | 310.286 | 6.582 | 311.294 | No results   | Full match   | Full match | 11434385.92 | 3270119.402 | 6422123.445 |
| Com_9247_pos  | N-(4-butyl-2-         | C23 H32   | 380.254 | 7.116 | 381.261 | Invalid mass | No results   | No results | 10235690.14 | 11577279.21 | 10108597.77 |
| Com_9258_pos  | 4,5-diphenyl-         | C15 H11   | 271.069 | 1.428 | 254.066 | Invalid mass | No results   | No results | 11346960.61 | 7848072.623 | 6362809.354 |
| Com_9332_pos  | YLK                   | C21 H34   | 422.253 | 5.05  | 423.26  | Full match   | No results   | No results | 3272375.712 | 2686929.685 | 1947217.781 |
| Com_9419_pos  | 5-(sec-butyl)         | C17 H20   | 268.154 | 1.235 | 269.161 | Invalid mass | No results   | No results | 636723.3811 | 1925354.142 | 1138167.813 |
| Com_9515_pos  | Heptadecanoic         | C17 H34   | 292.24  | 6.958 | 293.247 | Invalid mass | No match     | No results | 10823735.83 | 5915406.129 | 6596111.031 |
| Com_9533_pos  | Linolelaidic          | C18 H32   | 280.24  | 6.84  | 281.247 | No results   | No results   | Full match | 10783504.45 | 4576831.777 | 5428948.99  |
| Com_9721_pos  | KNK                   | C16 H32   | 388.243 | 4.842 | 389.251 | Full match   | No results   | No results | 958157.9242 | 980943.5238 | 993410.9372 |
| Com_9743_pos  | 2-hydroxy-6-          | C22 H30   | 304.259 | 8.403 | 305.266 | Invalid mass | No results   | No results | 6918992.326 | 6227245.091 | 11915417.16 |
| Com_9751_pos  | 5 $\alpha$ -Tetrahydr | C21 H34   | 388.214 | 8.177 | 389.222 | No results   | Invalid mass | No results | 7397520.014 | 5001139.219 | 9479007.45  |
| Com_9804_pos  | RMK                   | C17 H35   | 415.238 | 6.8   | 416.246 | Invalid mass | No results   | No results | 1301704.798 | 6376718.133 | 7054936.941 |
| Com_9824_pos  | PC (14:1e/2:C         | C24 H48   | 493.315 | 5.998 | 494.323 | No results   | Full match   | Full match | 10256228.85 | 5174883.383 | 6780221.377 |
| Com_10047_pos | AMK                   | C14 H28   | 330.178 | 4.958 | 331.185 | Invalid mass | No results   | No results | 9877483.35  | 4726204.674 | 14375750.76 |
| Com_10096_pos | D-Fructose 6-         | C6 H13 C  | 260.03  | 1.346 | 261.037 | No results   | No results   | Full match | 8743505.563 | 4749477.644 | 1791081.122 |
| Com_10098_pos | Tanshinone            | IIC19 H18 | 294.125 | 5.596 | 295.133 | No results   | Full match   | No results | 2995320.474 | 1379086.246 | 641363.836  |
| Com_10157_pos | ethyl 3-(2-be         | C19 H17   | 337.139 | 1.423 | 338.147 | Invalid mass | No results   | No results | 9691283.707 | 2994250.32  | 4378435.523 |
| Com_10162_pos | 4-(beta-D-Glu         | C11 H18   | 300.082 | 5.349 | 301.089 | Invalid mass | No results   | No results | 8267410.183 | 5552740.828 | 14937474.56 |
| Com_10206_pos | N'-2-benzylide        | C18 H18   | 294.136 | 6.06  | 295.144 | Full match   | Invalid mass | No results | 7234277.273 | 679795.7706 | 608696.7208 |
| Com_10259_pos | Estriol               | C18 H24   | 288.172 | 7.38  | 289.179 | Full match   | Invalid mass | Full match | 2576182.619 | 4077349.591 | 3084714.942 |
| Com_10311_pos | 10-Nitrolinol         | C18 H31   | 307.213 | 5.631 | 308.221 | No results   | Invalid mass | No results | 9418307.442 | 9132181.843 | 6813523.009 |
| Com_10356_pos | 2-methyl-6-[[         | C19 H15   | 359.062 | 1.35  | 360.07  | Invalid mass | No results   | No results | 9331130.042 | 6751095.803 | 1559625.307 |
| Com_10447_pos | VPH                   | C16 H25   | 373.176 | 4.986 | 374.183 | Invalid mass | No results   | No results | 9187457.68  | 5615991.694 | 2215305.204 |
| Com_10459_pos | 2,6-Dihydroxy         | C5 H4 N4  | 152.033 | 4.072 | 153.041 | No results   | No results   | Full match | 9171363.912 | 6931392.491 | 4866272.116 |
| Com_10563_pos | ACar 18:0             | C25 H50   | 427.366 | 7.993 | 428.374 | No results   | Invalid mass | No results | 4293186.115 | 4085815.544 | 3209426.199 |
| Com_10564_pos | Vitamin D3            | C27 H44   | 384.335 | 5.978 | 385.342 | No results   | Invalid mass | No results | 5063483.446 | 5324054.879 | 2127686.23  |
| Com_10630_pos | carbamazepine         | C15 H2 [  | 123.079 | 1.41  | 247.165 | Invalid mass | No results   | No results | 8917622.239 | 10119368.09 | 10465959.47 |
| Com_10673_pos | ethyl 4-methy         | C11 H12   | 236.063 | 1.181 | 237.07  | Full match   | No results   | No results | 5135624.605 | 3022713.358 | 4645313.737 |

|                                         |          |           |       |         |              |               |            |             |             |             |
|-----------------------------------------|----------|-----------|-------|---------|--------------|---------------|------------|-------------|-------------|-------------|
| Com_10841_posMazindol-d4                | C16 H9   | [ 288.099 | 6.073 | 289.107 | Invalid mass | No results    | No results | 3165523.748 | 5719992.38  | 2045556.778 |
| Com_10853_posfarensyl dipt              | C15H25O7 | 379.302   | 5.817 | 380.309 | No results   | No results    | Full match | 8586718.954 | 2112874.739 | 6496913.902 |
| Com_10916_pos(2,6-dimethylC11           | H16      | 286.128   | 4.984 | 287.135 | Invalid mass | No results    | No results | 8504581.712 | 6947069.918 | 7574296.549 |
| Com_10920_posPurine                     | C5 H4 N4 | 120.044   | 2.856 | 121.051 | No results   | No results    | Full match | 587136.5315 | 672020.2117 | 2476049.963 |
| Com_11048_pos17 $\alpha$ -Ethynyle      | C20 H24  | 296.177   | 5.839 | 297.184 | No results   | Full match    | Full match | 3542771.096 | 4131021.848 | 10155217.1  |
| Com_11066_posCinobufagin                | C26 H34  | 442.234   | 6.647 | 443.242 | No results   | Full match    | No results | 3349891.248 | 6493664.578 | 4485295.323 |
| Com_11090_posGuanidineacet              | C3 H7 N3 | 117.056   | 1.456 | 118.063 | No results   | Invalid mass  | No results | 4727766.238 | 4039080.018 | 2827867.51  |
| Com_11209_posD-Gluconic ac              | C6 H12 O | 196.058   | 1.128 | 197.066 | No results   | No results    | Full match | 5105862.063 | 10572291.56 | 6745271.864 |
| Com_11230_pos6-Ketoprostag              | C20 H34  | 392.216   | 6.72  | 393.223 | No results   | Invalid mass  | No results | 5499048.233 | 6861551.249 | 9602749.408 |
| Com_11272_posEtiocholanolc              | C19 H30  | 272.214   | 9.808 | 273.221 | No results   | Invalid mass  | No results | 8031436.899 | 3661763.457 | 5663994.452 |
| Com_11333_pos4-morpholino-              | C10 H13  | 269.047   | 4.809 | 270.054 | Invalid mass | No results    | No results | 4187282.431 | 4851598.06  | 1593263.02  |
| Com_11532_posAzilsartan                 | C25 H20  | 438.135   | 1.405 | 439.143 | Invalid mass | No results    | No results | 4783928.816 | 2497687.757 | 6917921.839 |
| Com_11567_posPLH                        | C17 H27  | 182.603   | 4.841 | 183.61  | Invalid mass | No results    | No results | 7636774.702 | 3476697.45  | 1333009.029 |
| Com_11615_posN <sup>+</sup> -[6-(tert-t | C18 H20  | 322.119   | 6.802 | 323.126 | Invalid mass | No match      | No results | 2322754.042 | 2099914.012 | 3456749.723 |
| Com_11656_posDutasteride                | C27 H30  | 528.222   | 5.132 | 529.229 | Full match   | No results    | No results | 5703987.395 | 9817264.474 | 6536766.009 |
| Com_11722_posRoburic acid               | C30 H48  | 220.183   | 6.728 | 221.19  | No results   | Invalid mass  | No results | 7462715.636 | 3971539.074 | 2811476.913 |
| Com_11729_posHLK                        | C18 H32  | 396.249   | 5.79  | 397.257 | Full match   | No results    | No results | 6946973.167 | 6395607.312 | 7208512.919 |
| Com_11765_pos8,15-Dihete                | C20 H32  | 336.23    | 5.54  | 337.237 | No results   | No results    | Full match | 7413583.658 | 6862080.188 | 7568312.509 |
| Com_11796_pos11(Z),14(Z),1              | C20 H34  | 306.256   | 8.686 | 307.263 | No results   | Full match    | Full match | 7383326.611 | 4771726.165 | 3747910.209 |
| Com_11853_posDl-Glyceralde              | C3 H7 O6 | 169.999   | 1.211 | 171.006 | No results   | No results    | Full match | 7314538.55  | 6426533.666 | 6450040.05  |
| Com_11869_posN-(1-benzothi              | C16 H14  | 304.069   | 5.22  | 305.076 | Invalid mass | No results    | No results | 308462.4573 | 2651072.982 | 761141.9679 |
| Com_11889_posEMK                        | C16 H30  | 388.177   | 4.903 | 389.185 | Invalid mass | No results    | No results | 1616380.43  | 1473917.402 | 615066.1918 |
| Com_11944_posSMK                        | C14 H28  | 364.184   | 4.822 | 365.191 | Invalid mass | No results    | No results | 3616222.139 | 2089594.511 | 2858596.151 |
| Com_11952_posL-Methionine               | C6 H13 N | 163.067   | 4.777 | 164.074 | No results   | No results    | Full match | 3107508.661 | 9206000.742 | 3441880.594 |
| Com_12094_posDextrorphan                | C17 H23  | 257.174   | 4.926 | 258.181 | No results   | Invalid mass  | No results | 2818481.885 | 3166719.082 | 2848370.836 |
| Com_12164_posNNK                        | C14 H26  | 374.195   | 5.117 | 375.202 | Invalid mass | No results    | No results | 6993848.89  | 5576141.769 | 6397947.396 |
| Com_12181_posKMH                        | C17 H30  | 396.2     | 4.844 | 397.208 | Invalid mass | No results    | No results | 6974081.726 | 7816228.867 | 5235363.26  |
| Com_12243_pos(2R,3S,4S,5R,              | C9 H18 O | 205.084   | 1.427 | 206.092 | Invalid mass | No results    | No results | 6923467.562 | 8047051.28  | 7234078.444 |
| Com_12391_posLysoPC 10:0                | C18 H38  | 411.237   | 5.404 | 412.244 | No results   | No results    | Full match | 6761979.214 | 2377459.487 | 6307307.685 |
| Com_12399_posAlternariol                | C14 H10  | 258.057   | 1.199 | 259.064 | No results   | Invalid mass  | No results | 730904.5579 | 1024395.395 | 881743.2474 |
| Com_12488_pos(5E)-7-methyl              | C15 H24  | 274.157   | 8.083 | 275.164 | Invalid mass | Invalid mass  | No results | 6660111.308 | 5440288.012 | 2683140.105 |
| Com_12506_posMethylparaber              | C8 H8 O3 | 152.045   | 1.217 | 153.052 | No results   | Invalid mass  | No results | 4829262.074 | 6092388.97  | 8081338.555 |
| Com_12544_posLysopc 18:2                | C26 H50  | 519.332   | 7.314 | 520.339 | No results   | No results    | Full match | 1060876.417 | 1369137.383 | 1122768.372 |
| Com_12830_pos7-(3,4-dihydr              | C19 H22  | 352.131   | 6.36  | 353.138 | Invalid mass | No results    | No results | 6314460.61  | 5265917.78  | 6109594.597 |
| Com_12837_posTerephthalic               | C8 H6 O4 | 166.027   | 1.444 | 167.034 | No results   | No results    | Full match | 2756307.993 | 5544714.414 | 6286702.435 |
| Com_13074_pos4,6,8-trihydr              | C11 H12  | 262.047   | 5.555 | 263.055 | Invalid mass | No results    | No results | 3185192.408 | 1619795.976 | 1669134.75  |
| Com_13204_posHMH                        | C17 H25  | 445.148   | 5.749 | 446.156 | Invalid mass | No results    | No results | 5998113.872 | 4288852.339 | 2623850.175 |
| Com_13370_pos(2E)-6-hydrox              | C15 H20  | 270.121   | 5.52  | 271.129 | Invalid mass | No results    | No results | 4148840.667 | 5449948.409 | 4193436.301 |
| Com_13457_posFisetin                    | C15 H10  | 286.051   | 1.137 | 287.058 | No results   | Invalid mass  | No results | 1717143.464 | 1606508.146 | 1562437.842 |
| Com_13698_posGlycoursodeox              | C26 H43  | 449.312   | 5.759 | 450.319 | No results   | No results    | Full match | 652411.2769 | 3337334.241 | 3008838.972 |
| Com_13703_posHQH                        | C17 H24  | 420.186   | 1.309 | 421.193 | Full match   | No results    | No results | 863247.4083 | 813744.7256 | 697304.266  |
| Com_13713_posTrimethyllysi              | C9 H21 N | 189.16    | 9.81  | 190.167 | No results   | No results    | Full match | 5547492.368 | 2356099.79  | 5172288.746 |
| Com_13768_posMagnolol                   | C18 H18  | 122.072   | 5.644 | 267.133 | No results   | Invalid mass  | No results | 2402654.568 | 2591396.916 | 1477985.278 |
| Com_13934_posCafestol                   | C20 H28  | 316.204   | 5.64  | 317.211 | No results   | Full match    | Full match | 5368729.107 | 5448738.941 | 6328827.33  |
| Com_13967_posNMK                        | C15 H29  | 373.185   | 5.085 | 374.193 | Invalid mass | No results    | No results | 5334934.369 | 4878580.755 | 6348751.431 |
| Com_14105_posTrenbolone ac              | C20 H24  | 312.172   | 5.623 | 313.179 | No results   | No results    | Full match | 1861276.811 | 2392913.334 | 2679473.31  |
| Com_14239_posResibufogenir              | C24 H32  | 384.228   | 7.264 | 385.236 | No results   | Full match    | Full match | 3200671.076 | 3675826.499 | 3170474.134 |
| Com_14246_posENK                        | C15 H27  | 389.191   | 4.748 | 390.198 | Full match   | No results    | No results | 3834647.673 | 3122505.025 | 2893620.311 |
| Com_14284_posSalvinorin B               | C21 H26  | 390.165   | 6.034 | 391.172 | No results   | Invalid mass  | No results | 4606276.44  | 3944779.693 | 4663026.054 |
| Com_14330_posChlorogenic AC             | C17 H20  | 368.11    | 5.574 | 369.117 | No results   | No results    | Full match | 1560077.964 | 2233198.919 | 1178559.181 |
| Com_14360_posN1-[2-(4-chlc              | C15 H11  | 258.137   | 6.663 | 259.144 | Invalid mass | No results    | No results | 2444983.475 | 1775529.324 | 2324232.305 |
| Com_14470_posRNK                        | C16 H32  | 416.255   | 6.806 | 417.263 | Invalid mass | No results    | No results | 1602574.918 | 1988275.247 | 1452025.975 |
| Com_14643_posProstaglandir              | C23 H38  | 408.249   | 7.627 | 409.256 | No results   | Invalid mass  | No results | 4382468.97  | 4843712.46  | 2293379.541 |
| Com_14655_pos(1E)-1,7-bis               | (C19 H20 | 296.14    | 5.687 | 297.147 | Full match   | Partial match | No results | 407189.1995 | 413708.0947 | 368232.0288 |

|                                |          |         |        |         |              |               |            |             |             |             |
|--------------------------------|----------|---------|--------|---------|--------------|---------------|------------|-------------|-------------|-------------|
| Com_14674_pos4-(tert-butyl)C16 | H19      | 273.132 | 4.145  | 274.14  | Invalid mass | No results    | No results | 4776641.354 | 3117434.866 | 3258020.177 |
| Com_14721_posN1-(1H-indol)-C15 | H18      | 280.098 | 4.866  | 281.106 | Invalid mass | No results    | No results | 4740574.59  | 3037505.301 | 4169049.187 |
| Com_14753_pos5-trans prost     | C20 H34  | 376.225 | 5.866  | 377.232 | No results   | Invalid mass  | No results | 4712639.228 | 3729124.341 | 4098340.218 |
| Com_14838_pos5,7-dihydroxy     | C15 H10  | 254.057 | 6.661  | 255.064 | Full match   | Partial match | No results | 2503567.126 | 3997468.304 | 2068191.888 |
| Com_14855_posOxysophocarp      | C15 H22  | 120.095 | 7.245  | 263.179 | No results   | Invalid mass  | No results | 1045609.626 | 2065798.592 | 2083776.343 |
| Com_15027_posPonicidin/Rut     | C20 H26  | 362.171 | 5.941  | 363.179 | No results   | Full match    | No results | 4433859.434 | 5224830.775 | 4977124.844 |
| Com_15148_posBufalin           | C24 H34  | 386.245 | 5.842  | 387.253 | No results   | Full match    | No results | 4442844.157 | 3415329.488 | 3844467.394 |
| Com_15202_posSulfamethazir     | C12 H14  | 278.079 | 5.858  | 279.086 | No results   | Invalid mass  | No results | 2896457.173 | 3804524.389 | 3523556.78  |
| Com_15347_posNotoptero         | C21 H22  | 354.146 | 6.35   | 355.153 | No results   | Full match    | No results | 1563161.124 | 1527273.989 | 707587.3533 |
| Com_15352_posDehydrotumulc     | C31 H48  | 484.35  | 6.14   | 485.357 | No results   | Invalid mass  | No results | 1675354.865 | 2689458.876 | 1678914.828 |
| Com_15540_pos2-(1,3-benzoc     | C16 H14  | 266.103 | 1.207  | 267.111 | Invalid mass | No results    | No results | 2765426.952 | 3382413.467 | 5316303.396 |
| Com_15651_posArtemisinin       | C15 H22  | 130.082 | 5.442  | 283.153 | No results   | Invalid mass  | No results | 3633839.518 | 3775516.902 | 6350399.476 |
| Com_15707_posStearoyl Etha     | C20 H41  | 327.313 | 7.369  | 328.321 | Full match   | No results    | No results | 3199958.842 | 2709874.386 | 2621918.371 |
| Com_15842_posN1-phenethyl-     | C15 H15  | 257.088 | 2.227  | 258.095 | Full match   | No results    | No results | 2943289.747 | 625925.0319 | 5022660.647 |
| Com_15979_pos3β-Hydroxy-ε      | C21 H34  | 318.256 | 8.024  | 319.264 | No results   | Full match    | No results | 2982352.845 | 2674487.374 | 3277956.666 |
| Com_16422_pos8,8-dimethyl-     | C14 H12  | 228.078 | 6.357  | 229.086 | Full match   | No results    | No results | 3668752.188 | 3557174.802 | 3793971.187 |
| Com_16694_posβ-Elemonic a      | C30 H46  | 454.344 | 6.015  | 455.352 | No results   | Full match    | No results | 2543111.768 | 774787.1796 | 1832721.925 |
| Com_16841_poscyclohexyl{4-     | C21 H26  | 364.191 | 10.926 | 365.198 | Invalid mass | No results    | No results | 929376.3329 | 294559.167  | 1861569.152 |
| Com_16990_posPC (14:0e/2:      | C24 H50  | 495.331 | 5.957  | 496.338 | No results   | Full match    | Full match | 1369435.676 | 537203.3821 | 463283.9419 |
| Com_17470_pos5-ethoxy-2-(C     | H11      | 396.036 | 1.139  | 397.044 | Invalid mass | No results    | No results | 2192731.768 | 1205851.463 | 1348840.243 |
| Com_17662_pos3-(4-hydroxy      | C14 H16  | 260.119 | 5.105  | 261.126 | Invalid mass | No results    | No results | 534515.4981 | 436529.3914 | 448975.1475 |
| Com_17816_pos17α-ethir         | C20 H24  | 296.177 | 6.148  | 297.184 | No results   | No results    | Full match | 2134023.253 | 3849514.401 | 1848963.357 |
| Com_18135_posN-(9-oxodecyl     | C12 H23  | 251.121 | 5.503  | 252.129 | Invalid mass | No results    | No results | 2793047.949 | 2336547.359 | 2809449.807 |
| Com_18138_posFMK               | C20 H32  | 446.196 | 7.098  | 447.203 | Invalid mass | No results    | No results | 274762.3502 | 1508447.033 | 2789541.586 |
| Com_18204_pos2-(14,15-Epo      | C23 H38  | 394.272 | 7.302  | 395.28  | No results   | Full match    | Full match | 1913023.443 | 2085167.251 | 1727758.992 |
| Com_18389_posSalvinorin A      | C23 H28  | 432.179 | 6.537  | 433.186 | No results   | Full match    | No results | 2360870.004 | 2705404.348 | 2788373.129 |
| Com_18434_posErgocalcifer      | C28 H44  | 396.339 | 10.703 | 397.346 | Full match   | No results    | Full match | 2525136.548 | 2511101.334 | 897772.2548 |
| Com_19187_posErgosterol        | C28 H44  | 396.338 | 7.431  | 397.346 | No results   | No results    | Full match | 234166.0454 | 654614.3571 | 360849.1346 |
| Com_19239_pos(11E,15Z)-9,      | C18 H32  | 350.209 | 7.135  | 351.216 | Invalid mass | No match      | No results | 2310372.203 | 1383672.31  | 2262908.32  |
| Com_19245_posPentadecanoic     | C15 H30  | 242.224 | 8.394  | 243.231 | No results   | No results    | Full match | 795420.3635 | 807510.0827 | 1006428.038 |
| Com_19556_posACar 20:6         | C27 H42  | 443.312 | 6.699  | 444.319 | No results   | Invalid mass  | No results | 2158226.299 | 2383904.07  | 2662332.248 |
| Com_19858_posSodium Dehydr     | C24 H33  | 424.223 | 6.357  | 425.23  | No results   | No results    | Full match | 1670580.983 | 2510055.613 | 1763185.708 |
| Com_19865_pos4-decyl-3-hyc     | C16 H26  | 352.152 | 5.646  | 353.16  | Invalid mass | No results    | No results | 611766.5783 | 504582.3651 | 599275.31   |
| Com_19898_pos7-α-carbc         | C28 H38  | 454.269 | 6.999  | 455.276 | Invalid mass | No results    | No results | 1642381.876 | 1487989.184 | 2229269.22  |
| Com_19899_posDulcitol          | C6 H14 O | 182.079 | 1.388  | 183.086 | No results   | No results    | Full match | 384291.6289 | 1029286.753 | 1091101.352 |
| Com_19946_posThymopentin       | C30 H49  | 679.365 | 5.126  | 340.69  | No results   | No results    | Full match | 793428.2591 | 1158392.378 | 573479.1495 |
| Com_20510_pos5-(benzyloxy)     | C13 H13  | 231.093 | 5.653  | 232.101 | Invalid mass | No results    | No results | 644256.1496 | 1242245.011 | 529528.9543 |
| Com_20999_posCelastrol         | C29 H38  | 450.277 | 7.452  | 451.284 | No results   | Full match    | No results | 1608142.816 | 1124401.503 | 1088732.458 |
| Com_21268_pos9-Aminoacridi     | C13 H10  | 194.085 | 5.508  | 195.092 | No results   | No results    | Full match | 1156249.829 | 1260647.276 | 978856.5449 |
| Com_22203_pos(+/-)-Equol       | C15 H14  | 242.095 | 5.768  | 243.102 | No results   | No results    | Full match | 1087271.406 | 326624.9815 | 545884.5305 |
| Com_22912_posEstradiol         | C18 H24  | 272.177 | 5.441  | 273.185 | No results   | No results    | Full match | 552373.3145 | 572599.476  | 770329.1072 |
| Com_23231_posVitamin D2        | C28 H44  | 396.34  | 8.061  | 397.348 | No results   | Full match    | Full match | 50381.09184 | 183348.1901 | 162782.7842 |
| Com_34_posMAG (18:3)           | C21 H36  | 352.26  | 7.247  | 353.267 | No results   | No results    | Full match | 610396772   | 951369318.2 | 3167594894  |
| Com_111_posTrehalose           | C12 H22  | 342.116 | 1.317  | 343.124 | No results   | No results    | Full match | 2162971854  | 1516568658  | 1105763353  |
| Com_191_posAla-Ile             | C9 H18 N | 202.132 | 4.946  | 203.139 | No results   | Full match    | Full match | 92795731.95 | 85709537.76 | 29972512.95 |
| Com_339_posγ-Glutamy           | C11 H20  | 260.137 | 5.333  | 261.144 | No results   | Full match    | Full match | 177714695.4 | 114022997   | 119523882.3 |
| Com_393_posOxaceprol           | C7 H11 N | 173.069 | 1.452  | 174.076 | No results   | No results    | Full match | 514745623.4 | 556341393.3 | 149384871.1 |
| Com_399_pos(5-L-Glutamyl       | C8 H14 N | 218.09  | 1.413  | 219.098 | No results   | No results    | Full match | 536152224.7 | 519582907.8 | 314668288.9 |
| Com_512_posTyramine            | C8 H11 N | 137.084 | 5.169  | 138.091 | No results   | No results    | Full match | 196687702.7 | 159024787.5 | 105592664.2 |
| Com_536_posTraumatic aci       | C12 H20  | 228.136 | 5.559  | 229.143 | No results   | No results    | Full match | 379620627.9 | 492017247.2 | 410257175.5 |
| Com_586_pos5-Hydroxyindc       | C8 H7 N  | 133.053 | 5.641  | 134.06  | Full match   | Not the top h | Full match | 105663037.5 | 31111756.06 | 161131146.5 |
| Com_608_posN-Acetylvalir       | C7 H13 N | 159.09  | 1.415  | 160.097 | No results   | No results    | Full match | 174528714.3 | 111958518.3 | 119651287.1 |
| Com_695_pos2-Deoxyuridir       | C9 H12 N | 228.075 | 1.42   | 229.082 | No results   | No results    | Full match | 276764909.6 | 212034436.5 | 191252370.4 |
| Com_704_pos2-{2-oxo-2-(C10     | H16      | 244.106 | 1.408  | 245.113 | Full match   | No results    | No results | 274040784.5 | 289795555.2 | 194147194.6 |

|              |               |          |         |       |         |              |               |            |             |             |             |
|--------------|---------------|----------|---------|-------|---------|--------------|---------------|------------|-------------|-------------|-------------|
| Com_735_pos  | Boc-beta-cyan | C9 H14 N | 214.095 | 4.892 | 215.102 | No results   | No results    | Full match | 264255291.8 | 199397407.8 | 175177896.4 |
| Com_738_pos  | L-beta-Imidaz | C6 H8 N2 | 156.053 | 1.35  | 157.061 | No results   | No results    | Full match | 198816904.3 | 343544435.1 | 169089834.7 |
| Com_754_pos  | 3-Nitro-L-Tyr | C9 H10 N | 226.059 | 1.416 | 227.066 | No results   | No results    | Full match | 256538608.5 | 319374812.3 | 119060692.6 |
| Com_763_pos  | 3-[4-methyl-1 | C15 H24  | 268.167 | 5.619 | 269.175 | Full match   | No results    | No results | 253787976.3 | 227276661.3 | 309320514.2 |
| Com_800_pos  | 1-(3-phenylpr | C15 H19  | 261.133 | 1.422 | 262.14  | Invalid mass | No results    | No results | 243031855.1 | 304693710.8 | 197404635.1 |
| Com_837_pos  | Ala-Gln       | C8 H15 N | 217.107 | 1.388 | 218.114 | No results   | No results    | Full match | 77998465.06 | 104453931.2 | 63158910.21 |
| Com_913_pos  | N-Acetylneur  | C11 H19  | 331.088 | 1.362 | 332.095 | Invalid mass | Invalid mass  | No results | 74267273.12 | 133623270.8 | 126964730.9 |
| Com_1034_pos | 12-Oxo phytoc | C18 H28  | 292.203 | 5.902 | 293.211 | Full match   | Partial match | No results | 180241156.5 | 159666049.9 | 181790291   |
| Com_1080_pos | Porphobilinog | C10 H14  | 226.095 | 1.462 | 227.102 | No results   | No results    | Full match | 174021907.2 | 158202783.1 | 116332721.8 |
| Com_1108_pos | D1-3-Hydroxyr | C5 H11 N | 133.074 | 1.326 | 134.081 | No results   | No results    | Full match | 81504382.77 | 111148482.9 | 48768666.55 |
| Com_1192_pos | PB-22 N-(4-Hy | C14 H17  | 247.117 | 1.347 | 248.125 | No results   | Invalid mass  | No results | 153489813.9 | 24227104.75 | 65682700.78 |
| Com_1234_pos | Phenylglyoxy  | C8 H6 O3 | 150.032 | 1.413 | 151.039 | No results   | No results    | Full match | 128663743.8 | 195311031.3 | 159248184.9 |
| Com_1280_pos | Phenylpropiol | C9 H6 O2 | 146.037 | 2.381 | 147.044 | No results   | No results    | Full match | 104087419.3 | 84409813.18 | 79740499.12 |
| Com_1338_pos | O-Phospho-L-s | C3 H8 N  | 185.009 | 1.281 | 186.016 | No results   | No results    | Full match | 13595868.15 | 19097794.56 | 40484686.22 |
| Com_1348_pos | 1-(4-Methoxyr | C10 H12  | 164.084 | 5.527 | 165.091 | No results   | No results    | Full match | 111870234.4 | 178311291.4 | 130096603.3 |
| Com_1380_pos | 4-Hydroxyisol | C6 H13 N | 147.09  | 1.342 | 148.097 | No results   | Full match    | Full match | 133797187.4 | 81643883.09 | 93574956.65 |
| Com_1528_pos | Methionine su | C5 H11 N | 183.057 | 1.327 | 184.064 | Invalid mass | Invalid mass  | No results | 121283935.7 | 62102457.21 | 45372115.65 |
| Com_1546_pos | Pyridoxamine  | C8 H12 N | 168.088 | 1.205 | 169.095 | Invalid mass | No results    | No results | 27170997.67 | 20899087.96 | 35099950.45 |
| Com_1611_pos | N-(5-Aminoper | C7 H16 N | 144.126 | 1.436 | 145.134 | No results   | No results    | Full match | 65502807.14 | 54287626.6  | 53681050.86 |
| Com_1728_pos | N1-(3-pyridyl | C16 H20  | 304.127 | 1.426 | 305.134 | Invalid mass | No results    | No results | 107756161.3 | 87645798.18 | 53354133.4  |
| Com_1931_pos | Asp-Phe methy | C14 H18  | 294.121 | 5.185 | 277.118 | No results   | No results    | Full match | 86782409.32 | 51212251.87 | 38171616.31 |
| Com_2150_pos | o-Cresol      | C7 H8 O  | 108.057 | 8.12  | 109.065 | No results   | No results    | Full match | 37294806.8  | 40878494.81 | 59445470.97 |
| Com_2225_pos | Lysopg 18:1   | C24 H47  | 510.296 | 6.395 | 511.303 | No results   | No results    | Full match | 46623973.34 | 91396637.54 | 66581012.03 |
| Com_2226_pos | Glycocholic a | C26 H43  | 465.309 | 5.944 | 466.316 | No results   | No results    | Full match | 2499926.137 | 9021348.364 | 4757857.489 |
| Com_2297_pos | Epinephrine t | C13 H19  | 333.106 | 1.439 | 334.114 | No results   | No results    | Full match | 51697359.65 | 51934281.68 | 26502697.05 |
| Com_2413_pos | Feruloyl Putr | C14 H20  | 264.147 | 5.48  | 265.155 | No results   | No results    | Full match | 54198678.2  | 52170665.66 | 23003302.39 |
| Com_2451_pos | Dimethyl 4-F  | C10 H10  | 210.053 | 1.401 | 211.06  | No results   | No results    | Full match | 49993475.04 | 95165391.65 | 89609564.37 |
| Com_2493_pos | Glu-Thr       | C9 H16 N | 248.101 | 1.413 | 249.108 | No results   | Full match    | No results | 66808805.52 | 56849503.82 | 39817775.22 |
| Com_2530_pos | all-cis-4,7,1 | C22 H34  | 312.244 | 6.758 | 313.251 | Invalid mass | Invalid mass  | No results | 7749421.354 | 15220004.85 | 18549814.1  |
| Com_2615_pos | Adenosine 5'- | C10 H14  | 347.063 | 1.381 | 348.07  | No results   | Full match    | Full match | 29530735.75 | 49843909.21 | 42586406.62 |
| Com_2664_pos | N-Acetyl-L-hi | C8 H11 N | 197.08  | 1.416 | 198.088 | No results   | No results    | Full match | 63051634.31 | 67332254.17 | 66329766.29 |
| Com_2751_pos | 5-Phenylvaler | C11 H14  | 178.099 | 5.635 | 179.107 | No results   | No results    | Full match | 45652166.77 | 51023313.55 | 96587440.52 |
| Com_2820_pos | Methyl alpha- | C7 H14 C | 194.079 | 1.428 | 195.087 | No results   | No results    | Full match | 28989697.68 | 42325323.87 | 45687382.14 |
| Com_2886_pos | 3-Hydroxypicc | C6 H5 N  | 139.027 | 3.638 | 140.034 | No results   | No results    | Full match | 10330801.28 | 11745316.53 | 17795497.52 |
| Com_2896_pos | N alpha-Acety | C8 H16 N | 216.123 | 1.431 | 217.13  | No results   | No results    | Full match | 46243451.96 | 55867308.12 | 44934201.59 |
| Com_2902_pos | acetyl phosph | C2 H5 O5 | 139.987 | 1.19  | 318.938 | No results   | No results    | Full match | 37754435.5  | 39925089.93 | 57202936.88 |
| Com_3007_pos | tetranor-PGD  | C16 H24  | 293.113 | 5.723 | 294.119 | Invalid mass | No results    | No results | 20380060.1  | 23832344.59 | 24670915.25 |
| Com_3120_pos | Ergosta-5,7,9 | C28 H42  | 394.323 | 7.577 | 395.33  | No results   | No results    | Full match | 36181536.58 | 44713153.96 | 52429441.09 |
| Com_3186_pos | L-Arabinitol  | C5 H12 C | 152.069 | 1.413 | 305.146 | No results   | No results    | Full match | 30446677.49 | 32992962.79 | 33534859.2  |
| Com_3275_pos | Asp-Phe       | C13 H16  | 280.106 | 5.227 | 281.113 | No results   | Full match    | Full match | 37185806.69 | 61495060.64 | 71311160.6  |
| Com_3608_pos | Ethyl chrysar | C12 H20  | 196.146 | 8.398 | 197.153 | No results   | No results    | Full match | 45051434.09 | 27202191.58 | 37738174.64 |
| Com_3615_pos | Lysope 18:1   | C23 H46  | 479.303 | 6.568 | 480.31  | No results   | No results    | Full match | 30194588.91 | 58647803.42 | 1903673.625 |
| Com_3639_pos | H-Gly-Pro-OH  | C7 H12 N | 172.085 | 1.672 | 173.092 | No results   | No results    | Full match | 44635276.9  | 55180132.28 | 32471693.95 |
| Com_3643_pos | 7-Ketocholest | C27 H44  | 400.333 | 9.882 | 401.341 | No results   | No results    | Full match | 25923435.61 | 23222707.48 | 20210899.81 |
| Com_3691_pos | N-Carbamyl-L- | C6 H10 N | 190.059 | 1.337 | 191.067 | No results   | No results    | Full match | 40243125.6  | 57085023.67 | 23861703.41 |
| Com_3825_pos | N4-Acetylcyti | C11 H15  | 285.096 | 1.416 | 286.103 | No results   | No results    | Full match | 42104674.63 | 51486964.95 | 32840293.8  |
| Com_3988_pos | L-Kynurenine  | C10 H12  | 208.085 | 1.426 | 226.119 | No results   | No results    | Full match | 39855719.38 | 33296590.17 | 24508379.53 |
| Com_4016_pos | 5-Methylcytos | C5 H7 N3 | 125.059 | 1.414 | 126.066 | No results   | No results    | Full match | 39486357.23 | 43744417.73 | 37453576.68 |
| Com_4218_pos | 15-OxoEDE     | C20 H34  | 322.25  | 6.644 | 323.257 | Full match   | Invalid mass  | No results | 37066965.14 | 24070629.66 | 40857162.46 |
| Com_4238_pos | L-Alanyl-L-Ly | C9 H19 N | 217.143 | 1.245 | 218.151 | No results   | No results    | Full match | 11489800.86 | 7374666.949 | 3835604.252 |
| Com_4364_pos | Dehydrocholic | C24 H34  | 402.239 | 6.352 | 403.246 | No results   | Full match    | Full match | 19256112.33 | 35442073.29 | 24220912.13 |
| Com_4466_pos | gamma-Glutamy | C14 H18  | 310.116 | 4.949 | 311.124 | No results   | Full match    | No results | 22739642.87 | 17969326.53 | 25818100.83 |
| Com_4712_pos | Ip7G          | C16 H23  | 365.17  | 1.431 | 366.177 | No results   | No results    | Full match | 31750054.2  | 20868575.69 | 21200557.76 |
| Com_4784_pos | D-Erythrose 4 | C4 H9 O7 | 200.009 | 1.218 | 201.016 | No results   | No results    | Full match | 31075202.2  | 24353301.24 | 30595104.53 |

|               |               |          |         |       |         |              |              |            |             |             |             |
|---------------|---------------|----------|---------|-------|---------|--------------|--------------|------------|-------------|-------------|-------------|
| Com_5100_pos  | Cyclocytidine | C9 H11 N | 225.075 | 1.423 | 226.083 | No results   | No results   | Full match | 28478355.41 | 30054866.05 | 23127639.57 |
| Com_5392_pos  | L-lysine      | C6 H14 N | 146.105 | 5.62  | 147.113 | No results   | No results   | Full match | 23826166.54 | 32627590.41 | 31527213.01 |
| Com_5483_pos  | Carnosine     | C9 H14 N | 226.107 | 1.323 | 227.114 | No results   | Full match   | Full match | 15270661.71 | 13479592.05 | 10627594.47 |
| Com_5838_pos  | N-Acetylhist  | C7 H11 N | 153.09  | 1.614 | 154.097 | No results   | No results   | Full match | 3243409.861 | 27520080.76 | 1907593.373 |
| Com_5884_pos  | 4-Methoxycin  | C10 H10  | 178.063 | 5.98  | 179.07  | No results   | No results   | Full match | 22836201.77 | 15448817.32 | 12765280.77 |
| Com_6188_pos  | L-Palmitoylca | C23 H45  | 399.334 | 5.894 | 400.341 | No results   | No results   | Full match | 21469135.02 | 20252391.3  | 10993659.44 |
| Com_6452_pos  | 6-Keto-prosta | C20 H34  | 370.235 | 6.407 | 371.242 | No results   | No results   | Full match | 20233864.58 | 18808308.73 | 15224902.81 |
| Com_6813_pos  | Anserine      | C10 H16  | 240.122 | 1.409 | 241.129 | No results   | No results   | Full match | 18575702.82 | 14377736.82 | 13963590.3  |
| Com_7089_pos  | N2-Methylguar | C11 H15  | 297.107 | 4.792 | 298.114 | No results   | Full match   | Full match | 6253821.201 | 6428116.181 | 3456653.748 |
| Com_7178_pos  | N-Oleoyl Glyc | C20 H37  | 339.276 | 6.187 | 340.284 | No results   | No results   | Full match | 17095608.49 | 13013138.23 | 11616087.66 |
| Com_7322_pos  | Spiculisporic | C17 H28  | 328.187 | 1.422 | 329.193 | No results   | No results   | Full match | 12174723.55 | 11579387.86 | 9277462.302 |
| Com_8354_pos  | Linoleoyl Eth | C20 H37  | 323.282 | 8.376 | 324.289 | Full match   | Invalid mass | No results | 5142434.962 | 5938398.835 | 4321284.362 |
| Com_8410_pos  | Pyridoxine 0- | C14 H21  | 331.127 | 1.426 | 314.124 | No results   | No results   | Full match | 13172716.92 | 13570230.41 | 7200748.432 |
| Com_10477_pos | Oleoyl-L-alf  | C21 H40  | 458.241 | 5.631 | 459.249 | No results   | No results   | Full match | 1079933.514 | 923807.3326 | 798292.2696 |
| Com_10740_pos | 11-Ketoetiocl | C19 H28  | 304.203 | 7.778 | 305.211 | No results   | No results   | Full match | 8750845.234 | 6010403.7   | 5016709.341 |
| Com_10801_pos | 2,3-Dinor-TXF | C18 H30  | 342.203 | 6.549 | 343.21  | No results   | No results   | Full match | 6545238.701 | 9376298.398 | 7679949.691 |
| Com_11149_pos | glutathione c | C20 H32  | 612.151 | 1.369 | 613.158 | No results   | No results   | Full match | 4596354.163 | 10693567.05 | 3734558.34  |
| Com_11540_pos | alpha-D-Glucc | C17 H30  | 443.201 | 1.237 | 444.208 | Invalid mass | No results   | No results | 7681160.502 | 6470513.073 | 5449394.466 |
| Com_11704_pos | 2-Arachidonyl | C23 H40  | 386.282 | 8.209 | 387.289 | Invalid mass | No results   | No results | 6028705.049 | 6342171.805 | 7383646.231 |
| Com_13064_pos | Andrographoli | C20 H30  | 372.191 | 6.877 | 373.198 | No results   | Invalid mass | No results | 5383408.897 | 7859568.49  | 9416398.934 |
| Com_15354_pos | Lysopc 16:2 ( | C24 H46  | 491.299 | 5.978 | 492.306 | No results   | No results   | Full match | 4293227.91  | 2454154.261 | 3348184.601 |
| Com_21955_pos | Lysopa 16:0   | C19 H39  | 410.242 | 5.46  | 411.249 | No results   | No results   | Full match | 1216606.399 | 1060323.603 | 1050057.024 |

| pos_L_C4    | pos_L_C5    | pos_L_C6    | pos_L_HW1   | pos_L_HW2   | pos_L_HW3   | pos_L_HW4   | pos_L_HW5   | pos_L_HW6   | pos_L_HWM1  |
|-------------|-------------|-------------|-------------|-------------|-------------|-------------|-------------|-------------|-------------|
| 6046656363  | 4941784527  | 4063718643  | 2752629072  | 3292817709  | 4598175470  | 10602820051 | 4626982385  | 8806560368  | 2658017142  |
| 2599591465  | 2252022477  | 4173786032  | 2047224692  | 2431751741  | 2622918340  | 874598313.9 | 2639526374  | 3384761335  | 2139891704  |
| 2835603514  | 3419491868  | 2454253288  | 3907503413  | 4302947866  | 1123174973  | 1802097970  | 2552884567  | 1865071606  | 1275516231  |
| 1004002945  | 1105962100  | 681835585.3 | 1217052874  | 3040250032  | 446898247.1 | 1451206957  | 923693569.2 | 1898291734  | 411464337.9 |
| 2312673833  | 3438802271  | 3341792632  | 2109952125  | 1886415190  | 1635402795  | 932123192.5 | 3165404376  | 1340839115  | 2152128543  |
| 1730264431  | 2727874874  | 1833409852  | 3163556682  | 1612611330  | 774568851.5 | 1093183292  | 2297707845  | 1083400733  | 1072259844  |
| 2416339942  | 2585204374  | 1541533152  | 2875172021  | 1850069068  | 724662720.5 | 1361825322  | 2746252104  | 2074888271  | 980239020.8 |
| 291603475.1 | 130278583.6 | 202692427.9 | 119048359.9 | 2406135400  | 91661721.19 | 590387709.2 | 58937241.89 | 75779471.26 | 55117833.97 |
| 758790412.4 | 829272135.4 | 422008340.5 | 1464819823  | 1816923034  | 433576686.2 | 3152562252  | 940849353.9 | 1529202144  | 518368896.7 |
| 847402012.3 | 1645708325  | 673565908.7 | 2049975017  | 1023416458  | 336148249.3 | 492699487.8 | 1026001286  | 521473225.8 | 820106209.7 |
| 100487016.2 | 69820146.73 | 123483584.6 | 546964315.4 | 471463492.4 | 522190002.1 | 516825817.3 | 298468412.6 | 523161316.8 | 1923250444  |
| 850920773.2 | 1344239188  | 1379914733  | 397911112.1 | 322978300.4 | 601806399.3 | 303800035.3 | 923408367.6 | 769672808.5 | 700606996.7 |
| 759528883.1 | 936459296.1 | 631278551   | 961908820   | 1088680692  | 421803764.3 | 431264376.3 | 717779484.1 | 723794962.1 | 348747283.4 |
| 364284434.7 | 183184016.4 | 96179998.07 | 468191673.8 | 310342743.8 | 561251084.8 | 1302769144  | 593826393.6 | 980763323.1 | 281412397.4 |
| 423876188.5 | 368982614.1 | 272242595.7 | 858595638   | 713636125.2 | 134647098.8 | 844406315.9 | 413916815   | 539251838.8 | 146500840.6 |
| 725669653.4 | 783662637.2 | 494085429.5 | 821230590.6 | 547018760.2 | 255961961.9 | 599834611.2 | 707214522.1 | 572613185.6 | 236530395.5 |
| 213478314.2 | 391913192.5 | 185771803.3 | 276519864.8 | 421573758   | 231261931.9 | 195515286.1 | 364540936.3 | 148170874   | 161484263.7 |
| 42860896.11 | 41178174.42 | 39392361.45 | 617277534   | 753457507.5 | 774054479   | 820860025.8 | 584003150.6 | 1086521712  | 497116678.9 |
| 427037854.1 | 749669091.4 | 499577466.4 | 721993839.8 | 714983407.7 | 188598148.8 | 229603609.6 | 588473818   | 262428887.5 | 339661744.5 |
| 188617501.1 | 415606066.9 | 297083451.2 | 74859389.25 | 121268889.5 | 162139466.6 | 142873275.3 | 220912417.4 | 199874988.7 | 66284328.16 |
| 53800167.86 | 103154226.6 | 61819148.43 | 465180299.9 | 521738374.9 | 457075917.3 | 686467006.2 | 489526874.1 | 569328362.2 | 455086443.4 |
| 132024522.3 | 80157957.31 | 76185302.47 | 318830824   | 410492796.5 | 465644099.4 | 372873098   | 364798125.4 | 375374881.9 | 346156571.3 |
| 173081232.8 | 138761309.9 | 171204009.4 | 81323668.34 | 74274128.69 | 77121583.87 | 71975444.37 | 75026898.76 | 111240498.6 | 78744591.25 |
| 236026001.6 | 98178223.16 | 193874780.9 | 52655998.04 | 289593048.9 | 34343957.77 | 588724214.5 | 29258912.15 | 236455895.7 | 93941163.06 |
| 301182280   | 309980737.9 | 194400507   | 345139893.1 | 228965011.5 | 85114738.32 | 92311181.14 | 322138105.5 | 140296432.5 | 207326115.6 |
| 135122448.1 | 183731022.5 | 140008357.4 | 262377368.9 | 230613426   | 305083928.6 | 340738044.2 | 299348048.6 | 226277358   | 369498293.2 |
| 348380439.9 | 202609759.5 | 383400356.8 | 222854054.6 | 174143953.4 | 247965979.1 | 191299883   | 204417694.2 | 148886384.3 | 296066709.5 |
| 53274513.66 | 32273432.78 | 23345317.65 | 60518271.35 | 186870063.6 | 45902023.19 | 457782142.6 | 69822614.12 | 148081277.7 | 47548613.88 |
| 365644498.1 | 569816427.5 | 486845721.1 | 235858132.6 | 250624006.8 | 183644726.3 | 169048870.8 | 400746592.9 | 409346325.1 | 213887457.1 |
| 116612054.1 | 178742885.2 | 90832740.86 | 172596928.1 | 206429885.6 | 157777100.4 | 400029243.3 | 174004935.5 | 147046993.7 | 170392427.2 |
| 94503023.71 | 100147587.4 | 91469966.65 | 196735738.6 | 89773088.69 | 72525781.58 | 71354824.84 | 77082815.18 | 56634264.42 | 73668559.74 |
| 219141575.7 | 152484151.8 | 172960463.7 | 102160354.1 | 157444271.1 | 123097364.8 | 146327151.4 | 79467248.54 | 144246863.8 | 108506984.2 |
| 5535621.432 | 8086846.273 | 6537740.366 | 7624339.997 | 5046025.996 | 4232435.535 | 5215262.128 | 6356108.33  | 7217963.474 | 6312884.389 |
| 151100404.2 | 278429026.9 | 223845035.5 | 197626445.1 | 132714892.8 | 127261325.2 | 312984962.3 | 218699865.9 | 133208477.4 | 272169826.9 |
| 181222333.8 | 188471607.5 | 161394129.9 | 83185993.76 | 86629052.04 | 80756530.84 | 175708601.2 | 122146855.1 | 215132439.1 | 131193876.8 |
| 214035329.1 | 223391079.4 | 161322229.8 | 104905410.9 | 119756932.4 | 89216176.15 | 108419646.5 | 101354253.2 | 103011523.9 | 72284169.1  |
| 96880279.38 | 105257875.8 | 64252694.77 | 173658845.9 | 142853693.9 | 27988707.83 | 46039066.67 | 101801089.5 | 58643068.65 | 43549610    |
| 49749187.18 | 53657411.4  | 31351379.01 | 61755343.55 | 61797714.52 | 42884695.26 | 214945759.6 | 62633256.67 | 80956330.96 | 64383081.28 |
| 28905380.63 | 25455955.99 | 35242649.15 | 91158663.05 | 97900629.54 | 196721580.5 | 37666654.2  | 92126618.76 | 182092597.5 | 93478122.77 |
| 80094811.46 | 175571282.9 | 95789439.18 | 32288321.01 | 47282601.53 | 187714386.2 | 44716719.9  | 244528591.8 | 166745013.4 | 26710477.05 |
| 56478716.17 | 102692706.2 | 66982934.77 | 13984822.24 | 21679281.3  | 30173445.26 | 20350458.31 | 36229997.6  | 14073119.54 | 10663816.66 |
| 73352179.53 | 75911469.72 | 57978669.45 | 1935977.943 | 2345938.215 | 2202175.757 | 2434953.335 | 2226469.689 | 2236308.779 | 1922240.462 |
| 36585360.57 | 16400346.67 | 51685270.73 | 5626662.522 | 30386076.35 | 22102626.61 | 5910105.487 | 7661467.38  | 14638814.51 | 20262148.12 |
| 48556727.82 | 43946233.29 | 65957156.35 | 23073245.92 | 21355817.84 | 27189420.75 | 29783414.52 | 25107299.56 | 42810829.8  | 25370385.3  |
| 77648515.9  | 46144710.04 | 45227204.48 | 94229216.39 | 80038039.48 | 57422953.31 | 133187687.2 | 68444928.02 | 144943538.2 | 70369275.51 |
| 30204992.23 | 25387140.7  | 43088538.37 | 94329976.56 | 67331608.33 | 67881556.02 | 27241371.33 | 39433581.14 | 65478938.48 | 62088931.91 |
| 17701534.68 | 12825062.3  | 26988823.7  | 8177671.802 | 3611889.507 | 2365238.033 | 5252279.439 | 6346709.178 | 6223990.355 | 133133809.4 |
| 4331550.423 | 2343249.709 | 3610446.073 | 92457608.31 | 7074378.734 | 5963730.672 | 10238211.34 | 4628122.623 | 4429436.108 | 28977725.09 |
| 34884229.13 | 22053740.44 | 18062744.32 | 20558020.09 | 51012903    | 41955065.9  | 103826304.4 | 55036841.25 | 124580940.6 | 33135362.51 |
| 80444694.87 | 101828187.8 | 77131855.74 | 32539475    | 31857516.54 | 69462309.63 | 77789400.68 | 77395449.31 | 97303399.04 | 75814347.55 |
| 15239753.18 | 5513165.911 | 5782302.926 | 36184453.29 | 62360153.85 | 63112220.85 | 53306608.24 | 66629512.18 | 49281774.85 | 58528135.06 |
| 8124557.587 | 11757492.49 | 19489948.51 | 12324314.53 | 26306363.1  | 4893559.18  | 5762263.943 | 5711101.433 | 6322131.632 | 124849883.9 |
| 19279525.14 | 31301753.65 | 41313471.89 | 32201988.41 | 36153043.18 | 95590637.66 | 14113707.73 | 43492065.66 | 103658163.8 | 30840381.78 |

|             |             |             |             |             |             |             |             |             |             |
|-------------|-------------|-------------|-------------|-------------|-------------|-------------|-------------|-------------|-------------|
| 63593274.88 | 65532242.2  | 60372664.14 | 24899242.73 | 41258123.18 | 49552396.24 | 24182460.48 | 49787118.87 | 45766249.49 | 56983553.06 |
| 52574890.35 | 44044136.56 | 45343177.42 | 35789443.69 | 20014560.22 | 76351776.5  | 31323158.27 | 57364679.74 | 47612997.82 | 79997829.8  |
| 2616737.76  | 2491455.176 | 13736217.08 | 1331985.345 | 10493201.3  | 2730225.103 | 2120979.405 | 685608.7665 | 2176801.341 | 105624102.7 |
| 27153083.9  | 50846535.32 | 28132003.29 | 19029560.58 | 21449029.16 | 43849279.67 | 38898504.1  | 26249930.48 | 36229268.66 | 47221842.58 |
| 38585173.75 | 51952327.68 | 54297305.09 | 16551281.46 | 24413959.58 | 35234726.93 | 25127817.7  | 33391245.39 | 37806799.87 | 36917464.82 |
| 39792448.35 | 14220574.99 | 10574977.61 | 37213609.5  | 8530701.61  | 24201290.03 | 26981337.97 | 57754759.96 | 30533311.24 | 12532531.5  |
| 1420855.899 | 11606620.08 | 920742.932  | 4975394.225 | 7407932.557 | 2393371.687 | 1697837.076 | 3743541.77  | 1172913.04  | 8166069.126 |
| 4553195.623 | 4083207.459 | 10063884.06 | 578655.0879 | 5512613.708 | 2698011.842 | 546894.3464 | 1420072.383 | 892597.5114 | 1252134.596 |
| 2484827245  | 2232536012  | 1308165174  | 3904409482  | 5166414975  | 1658021830  | 16875532161 | 3098084076  | 7605784179  | 1602820092  |
| 2536049160  | 3891420023  | 3250136959  | 2595577775  | 2318206880  | 2422509405  | 1608034802  | 2291238939  | 533081926.2 | 1600131402  |
| 701660663.8 | 2106448169  | 1574597029  | 3132773208  | 2880742402  | 615817546.9 | 699050694.6 | 2263887450  | 992080983.2 | 1134029204  |
| 1222479691  | 2418297270  | 1548750924  | 2579311624  | 1553113962  | 563429633   | 688333309.1 | 828151937.2 | 517789891.7 | 1065289599  |
| 778974483.3 | 874123211.1 | 439962844.5 | 1576840566  | 1881920680  | 448673566.4 | 3160993255  | 1011601099  | 1534516415  | 560842474.7 |
| 2154727821  | 2539339176  | 1927280105  | 1445932128  | 1385452029  | 1758834177  | 1916661038  | 1876433423  | 2016149712  | 1996706784  |
| 746850614.5 | 1366305460  | 967128485.4 | 1371391827  | 1038397933  | 341542803.4 | 402468476.9 | 837360770.6 | 426095185   | 339879793   |
| 1152980103  | 969225654.2 | 910996933.1 | 457525441.2 | 527800696.5 | 981503454.2 | 636972150.3 | 1543885988  | 1266904159  | 360124365.6 |
| 752796497.2 | 925490909.9 | 625123714.5 | 948591512.2 | 1076830335  | 416988645.8 | 426192248.9 | 711376568.8 | 714498169.1 | 346558257.1 |
| 1215448553  | 1074920876  | 946311957.4 | 326763033.8 | 323608768.9 | 205391986.3 | 1353105705  | 101592399.9 | 163236570.6 | 587113117.4 |
| 211496033.2 | 232367288.5 | 114832481.2 | 488131203.7 | 54365018.96 | 736224957.6 | 201176007.5 | 1507752948  | 1035806075  | 67636514.03 |
| 660420941.2 | 1028840034  | 706695104.1 | 204870619   | 244062910.6 | 202368192.2 | 216913383.1 | 141966495.6 | 352793516.3 | 217539741.7 |
| 80251659.52 | 154761384.1 | 132184620   | 82841588.07 | 46193805.75 | 42857130.05 | 48913244.69 | 314138060.4 | 31400115.74 | 1225644507  |
| 347091712.8 | 498761738.2 | 249673635.3 | 788489620.1 | 480305902.9 | 34307740.65 | 81331889.22 | 265504029.9 | 38580498.87 | 70872608.36 |
| 757648556.7 | 705414747.3 | 377213101   | 293183769.5 | 473818305.5 | 311400525.4 | 637562358.3 | 426168704.3 | 833148433.4 | 264773434   |
| 361081021.7 | 582228621.7 | 256084852.3 | 389757028.8 | 560857805.1 | 92226768.31 | 118723172.4 | 557928723.6 | 185845679.9 | 309971200.6 |
| 262804803.9 | 360226421.3 | 215711190.8 | 131742466.8 | 145136770.5 | 106031993.3 | 90325932.58 | 136951394.1 | 154720661.7 | 112876235.1 |
| 175747839.5 | 218251097.9 | 222955201.9 | 60747019.81 | 59535741.4  | 80289820.32 | 76921335.56 | 100686632.9 | 56188222.62 | 31128325.33 |
| 68863160.06 | 114864424.2 | 106476496.5 | 313735609.7 | 355342747.6 | 21813396.52 | 99568870.48 | 49458062.26 | 28236933.54 | 118942965.6 |
| 34082681.54 | 27359120.48 | 27496994.21 | 17698128.78 | 14446305.42 | 18291388.45 | 41988978.93 | 22124507.14 | 28280061.26 | 43605871.43 |
| 12761340.91 | 18874578.63 | 14028694.98 | 12013781.29 | 14041694.87 | 17079054.68 | 13214009.38 | 15420658.05 | 16198647.87 | 334719655.4 |
| 316101998.4 | 141182647   | 86811447.84 | 60320824.01 | 77188627.78 | 161548320.9 | 127278361.5 | 62399269.45 | 72417435.27 | 50336738.27 |
| 288142638.4 | 204183033.8 | 156748950.6 | 206410039.3 | 183820736.7 | 166960165.9 | 145836927.4 | 431927162.3 | 323267803.5 | 88702470.36 |
| 134955029.3 | 285973856.5 | 91653284.84 | 57354390.51 | 54262309.22 | 45111339.76 | 48223941.54 | 108235854.1 | 62415941.44 | 8394467.711 |
| 237123154.3 | 177907847.5 | 159975165.2 | 81628548.57 | 102336381.9 | 107907000.2 | 108373161.5 | 88405377.96 | 102139609.9 | 106560165.4 |
| 7315307.677 | 14983199.44 | 6843503.979 | 231375568.2 | 29878055.6  | 3602766.33  | 75310228.43 | 10748240.23 | 9980161.887 | 16166512.69 |
| 44986477.29 | 45416658.49 | 42067801.18 | 72093286.02 | 154353632.4 | 96860940.33 | 103225672.6 | 272406505.3 | 134173460.4 | 79403911.68 |
| 247694464.7 | 76980756.36 | 129320868.8 | 88615867.3  | 52682591.35 | 37764347.28 | 39815167.5  | 52753006.06 | 58510419.03 | 166553771.6 |
| 56385385.68 | 82188120.13 | 55254647.45 | 185777883.1 | 107160462.5 | 16595045.56 | 35960784.17 | 35118190.24 | 27394781.84 | 49253128.36 |
| 67752680.6  | 42288217.64 | 51393181.56 | 65957767    | 76048755.67 | 144874026.1 | 47021616.1  | 114678043.8 | 99998265.13 | 142539821.6 |
| 29218014.36 | 32654730.78 | 12037190.64 | 62963826.44 | 5935338.765 | 94326060.23 | 24016532.5  | 150127633   | 83007699.82 | 6994864.06  |
| 4123448.93  | 5654130.634 | 13246263.15 | 108798452.7 | 12142434.15 | 8329344.544 | 16899552.5  | 9606040.947 | 7271538.909 | 101449348.8 |
| 5407272.535 | 6419390.389 | 5176623.997 | 4237789.87  | 5714687.286 | 9114933.638 | 5230055.405 | 5375041.555 | 4241135.28  | 63564964.33 |
| 64581523.49 | 55060642.15 | 40459385.79 | 45006637.37 | 45204774.6  | 46360036.12 | 67544034.57 | 47088274.29 | 34372638.74 | 46185976.17 |
| 60233069.47 | 32851804.33 | 38925833.96 | 54339393.3  | 73162950.94 | 61364416.44 | 85717105.98 | 55947397.15 | 87974355.57 | 82047176.89 |
| 41814955.18 | 46311884.1  | 61624053.05 | 40697144.76 | 29494374.31 | 26427341.44 | 31081798.06 | 53606752.42 | 56889589.78 | 112098932.5 |
| 48457367.76 | 54140804.42 | 82701783.79 | 45832319.14 | 54812321.06 | 71243164.56 | 53599706.11 | 54266279.98 | 61181713.56 | 57502048.74 |
| 9650184.736 | 14548893.35 | 12249764.08 | 7890093.877 | 11003797.76 | 8356184.417 | 17822509.02 | 9718287.16  | 8817188.333 | 55663308.55 |
| 14787769.97 | 3247608.765 | 4410921.778 | 3350456.727 | 7015427.282 | 1937890.224 | 4779308.586 | 14702925.41 | 65978060.87 | 4035319.829 |
| 4765886786  | 7528007900  | 5376933907  | 8313775661  | 7249582623  | 1446202319  | 2222629404  | 4840544465  | 2677545518  | 3096299106  |
| 2902048602  | 2576960580  | 1849432879  | 389106498.4 | 1007220311  | 622535650.3 | 153575721   | 2489324980  | 1085603378  | 457402182.1 |
| 231663016.2 | 222312552.5 | 367712377.1 | 789868989.6 | 3859164876  | 239803509.5 | 1429472886  | 89526656.27 | 230406740.8 | 629458635.2 |
| 1961515490  | 2359353678  | 1537707322  | 3452026122  | 2032912952  | 455036348.8 | 593893674.9 | 1726637137  | 1050716005  | 895314753.6 |
| 2164665870  | 843529309.5 | 1308916817  | 315151815.5 | 944184417.7 | 1542538423  | 800065857   | 445350534.4 | 1020335541  | 646573465.8 |
| 577671485.1 | 932914302.6 | 490491287.9 | 1204607395  | 5109656.184 | 1449205809  | 2227278667  | 2877182969  | 2345612775  | 1787893424  |
| 37722084.29 | 37054578.77 | 52406389.28 | 203294291.8 | 995824031.7 | 289979356.2 | 258646775   | 228287859.2 | 2143704312  | 263337704.2 |

|             |             |             |             |             |             |             |             |             |             |
|-------------|-------------|-------------|-------------|-------------|-------------|-------------|-------------|-------------|-------------|
| 1049533425  | 979905037.1 | 887559324.6 | 201650287.5 | 455560403.4 | 291269599.6 | 82236288.27 | 841350252.5 | 486211916.6 | 181259444.7 |
| 787747734   | 675590183.9 | 954651384.8 | 681156004.2 | 191989082.1 | 228112029.4 | 356027725.5 | 669578895.7 | 487435852.4 | 235581915.9 |
| 444816832.5 | 592813168.7 | 277984120   | 834763817.4 | 448062464   | 996898212.8 | 1062439705  | 1553519222  | 1277797119  | 734581787.6 |
| 310019609   | 1055760495  | 257683516.3 | 424867239.5 | 122494720.9 | 120582363   | 136254691.4 | 424602717.9 | 184450335.9 | 135394147.8 |
| 16333231.09 | 655197906   | 620721495.6 | 20198534.58 | 73325038.61 | 10483830.66 | 27254575.16 | 5344844.254 | 8669856.005 | 17904463.97 |
| 1012152251  | 937225797.3 | 830646451.6 | 400133388.1 | 373400886.9 | 919293379   | 552222431   | 638395245.3 | 824151594.6 | 841105847.6 |
| 245389327.2 | 209049263.2 | 52459970.71 | 402286751   | 174397852.8 | 162382985.6 | 63955402.03 | 18671130.1  | 319996327   | 441117915.5 |
| 98335724.27 | 39138343.3  | 99669233.87 | 62219303.81 | 180102026.7 | 142887646.9 | 399846986.3 | 718628907   | 31506277.2  | 79274407.56 |
| 496153035.9 | 749830149   | 491790974.2 | 217630430.5 | 126429193.2 | 250360372.4 | 169526607   | 245072621.3 | 243761971   | 261828930.3 |
| 75814877.6  | 557609369.9 | 425596775   | 227612157.5 | 250695978   | 399867339.4 | 368957620.8 | 715459652.8 | 493877949.8 | 241198312.4 |
| 38692506.34 | 148159244   | 10982470.41 | 85363122.33 | 11724549.93 | 104890687.8 | 32999744.49 | 692112656   | 27017496.99 | 109416501.9 |
| 108014022.7 | 161033110.5 | 147455878.7 | 516286577.2 | 633726503.8 | 538562533.8 | 795730257.3 | 585321766.6 | 640990534.6 | 506947543.2 |
| 46977140.57 | 88016422.04 | 38576576.29 | 113763544.9 | 75972257.76 | 99834654.77 | 290873640.9 | 18942834.3  | 262852260.6 | 74384128.48 |
| 2260698.255 | 11858965.16 | 18459253.69 | 205703407   | 533278340.6 | 341241485   | 365038241.7 | 303092743.3 | 304794527.3 | 535555947.6 |
| 398868413.9 | 389543100   | 361674398.5 | 210494793.8 | 304975651   | 327660092.1 | 260869373.1 | 322641795.4 | 325712907.6 | 355689196.7 |
| 95779082.15 | 189133577.7 | 177007009.1 | 486906565.6 | 152922857.3 | 244665347.7 | 521076869.8 | 200413705.1 | 311581598.3 | 631402371.5 |
| 234549901   | 169585919.2 | 164308009.3 | 31313821.48 | 101623403   | 72975118.31 | 23206271.43 | 155608388.7 | 87189474.6  | 44043949.81 |
| 98039803.8  | 109398046.7 | 134146450.4 | 196850333.8 | 437174300.1 | 86811978.35 | 221638357.1 | 47988013.71 | 108381283.4 | 107927573.3 |
| 303461022.1 | 171959698.6 | 181719645.4 | 445917296.4 | 427452219.3 | 477199102.2 | 354473549.5 | 347591759   | 227655857.2 | 295150138.6 |
| 403762430.2 | 406946409.1 | 390389240.5 | 145028327.1 | 190266619.1 | 395247866.7 | 122271416.6 | 434689849.2 | 188440508.6 | 167442538.4 |
| 302657441.4 | 172559541.8 | 177507068.9 | 422762871.5 | 414374100   | 484639361.5 | 374146167.5 | 373326976.7 | 287023735.6 | 390532136.1 |
| 94894911.67 | 81590331.67 | 165140423.9 | 168336756.8 | 60683564.6  | 135883736.1 | 117042537.3 | 48132571.37 | 164359288.3 | 237807212.8 |
| 297193728.4 | 462961216.7 | 306171719.2 | 135533767.3 | 77303134.86 | 147124198.7 | 139887175.2 | 133101864.2 | 162755862.4 | 183357527   |
| 215381789.1 | 187027814.7 | 160847905   | 124162983.8 | 199220167.4 | 126753512.3 | 234800396   | 128707037.9 | 178922436.6 | 101152561.8 |
| 61671854.54 | 60441733.76 | 92291075.79 | 274412445.3 | 338114557.7 | 350056242.1 | 441748340.1 | 333896252.7 | 424772523   | 527414090.5 |
| 242191643.9 | 441942464.4 | 289874914.4 | 51777547.28 | 31832393.18 | 183504898.5 | 19657754.44 | 229066046.5 | 75835416.2  | 281857361.6 |
| 3211856.575 | 19732724.29 | 25094260.48 | 225321761.4 | 348477737.6 | 374203366.5 | 397810056.3 | 331034397.5 | 332566416.5 | 584914587.2 |
| 64925357.59 | 42827920.95 | 71379187.28 | 78512480.08 | 129316888.6 | 48598690.32 | 78211627.61 | 71267923.59 | 47851099.56 | 401045565.3 |
| 294951004.4 | 266243407.9 | 204080932.7 | 153213240.2 | 249647931.5 | 184016067.4 | 210628247.8 | 115398984.1 | 161151473.7 | 175622803.3 |
| 4159064.996 | 6545073.184 | 5646722.221 | 36653167.88 | 100232479.8 | 226722765.3 | 339243166.3 | 90390910.7  | 421743155.9 | 62591588.08 |
| 92984271.97 | 86562342.63 | 78070394.8  | 157684333.4 | 178911125.1 | 52729394.79 | 389079858.5 | 108234400   | 240636219.1 | 58205558.59 |
| 21772636.55 | 207139815.1 | 190937068.8 | 26138551.16 | 80689208.01 | 58419080.78 | 41711804.06 | 14509176.97 | 13856881.25 | 69080917.86 |
| 159424297   | 96632044.37 | 88985211.81 | 24320591.45 | 45006540.54 | 154399517.8 | 373500741.4 | 155239648.4 | 59359077.42 | 86812306.69 |
| 220352386.5 | 154468411.2 | 197705252.5 | 176890356.1 | 244895317.5 | 343705425.6 | 274729835.2 | 189870394.6 | 298785829.7 | 252474685.1 |
| 154382155.7 | 103369279.3 | 97748199.57 | 247387731.3 | 251835483.8 | 280260157.6 | 215171052.5 | 192200793.8 | 151615668.3 | 216380020.3 |
| 163822177   | 225034685.8 | 204355519.9 | 32847712.04 | 40080948.33 | 153936341.4 | 26903318.13 | 118099384.9 | 157726985.9 | 52652171.91 |
| 50538433.15 | 79116778.71 | 57331290.43 | 115525774.6 | 239850479.7 | 42516876.09 | 79310541.44 | 57095536.46 | 44804815.81 | 61246616.76 |
| 20605325.58 | 35314303.52 | 41943300.57 | 95672561.19 | 239426972.8 | 21242656.52 | 72487376.6  | 10101117.8  | 12206613.33 | 51909829.7  |
| 175530657.7 | 97747413.55 | 166178971.1 | 252554373.3 | 226215166   | 245910489.2 | 180073269.4 | 163346711.2 | 127225288.7 | 257857634.9 |
| 167673355.9 | 93350420.08 | 52689268.69 | 91300424.77 | 93310322.11 | 130887570   | 273873547.2 | 115990856.6 | 338934350.7 | 40735023.9  |
| 179500860.1 | 193624809   | 157167292.9 | 135138044   | 184729498   | 119859347.4 | 172958168   | 231208016.9 | 156917465.8 | 168632549.1 |
| 269743339.6 | 272374615.9 | 222273667.4 | 116304507.1 | 150750585   | 278991909.2 | 176536422.2 | 247685581.8 | 170508535.7 | 115509283   |
| 143208727.5 | 159598510.7 | 119017610.1 | 80851921.23 | 89553882.91 | 97238197.88 | 164956522.8 | 70906431.76 | 62134888.94 | 94922656.31 |
| 181903996.6 | 105853021.1 | 129095971.8 | 112553397.7 | 204147191.2 | 259264563.5 | 229668903.7 | 152518021.3 | 244013724.5 | 201960961.4 |
| 74233633.16 | 40072608.7  | 24798118.65 | 119026219.6 | 93100653.38 | 146508183   | 119931177.8 | 182659285.3 | 125038288.4 | 123071696.7 |
| 182416235.9 | 188474022.3 | 140240638   | 88443844.7  | 95973314.21 | 72393596.39 | 78445824.1  | 82538916.34 | 65615145.36 | 46762394.63 |
| 50026074.67 | 41226742.06 | 27649868.02 | 16507374.28 | 192155518.8 | 30979177.42 | 170200418.2 | 29534752.98 | 28230824.27 | 22858411.56 |
| 108608318.1 | 51366745.76 | 111343964.9 | 33886768.79 | 158866458   | 98403826.62 | 63225485.32 | 169124317.7 | 146222131.4 | 17593614.7  |
| 151617804.9 | 157872933.6 | 134064130.5 | 124843456.8 | 89613694.35 | 101073296.6 | 185556309.4 | 130544663   | 161022714   | 175886473.3 |
| 8774025.33  | 26790911.67 | 17577758.19 | 46235586.22 | 175951430.2 | 7295325.923 | 35102364.67 | 18420861.38 | 7139113.94  | 17273072.25 |
| 181457986.4 | 238982529.6 | 199596392.7 | 95593610.25 | 103442684.9 | 141635454.7 | 135387747.5 | 163157407.7 | 159076325.8 | 154845696.9 |
| 31405884.7  | 26500620.88 | 26424058.81 | 182226544.3 | 17243628.73 | 14763165.5  | 22987267.26 | 38841214.3  | 44502971.44 | 20440306.94 |
| 109591115.5 | 65445830.79 | 66600441.27 | 176579589.1 | 168723219   | 188845904.3 | 121032438.9 | 114377508.1 | 75869668.7  | 132233670.3 |
| 28064192.51 | 9442432.056 | 51873904.45 | 29508334.91 | 71715182.51 | 163096556.7 | 31669210.13 | 45019119.33 | 63432833.47 | 25841736.57 |



|             |             |             |             |             |             |             |             |             |             |
|-------------|-------------|-------------|-------------|-------------|-------------|-------------|-------------|-------------|-------------|
| 135936120.8 | 136548101   | 94298832.52 | 68716962.01 | 75827016.83 | 66065971.69 | 137821683.2 | 87779741.7  | 82744944.8  | 115144404.3 |
| 150989747.6 | 183198150   | 143563850.9 | 87841807.45 | 126439601.4 | 111638440.3 | 123622873.5 | 107708696   | 128861823.5 | 105067919.4 |
| 113100796.3 | 149833944   | 129359078.5 | 49084512.65 | 83735607.52 | 110746582.8 | 104570466.1 | 78901670.05 | 99211335.27 | 81993360.91 |
| 125643723.5 | 89526218.1  | 95239622.76 | 50201043.42 | 109614894.7 | 194284959.2 | 133501540.4 | 33923659.06 | 195518156.3 | 114159313.7 |
| 80768690.02 | 76845695.47 | 75878252.88 | 31741629.07 | 59293968.26 | 41768418.88 | 62194910.34 | 54792187.9  | 35280418.37 | 24043607.94 |
| 125078109.4 | 143789011.3 | 124383440.1 | 132276989.9 | 59739624.54 | 117382797.6 | 127321264.8 | 79331604.81 | 201987222.6 | 141352547.1 |
| 126211884.1 | 163096564.1 | 146352019   | 82197613.78 | 77881540.77 | 88653563.03 | 74724611.44 | 90974065.89 | 83083166.92 | 105495807.1 |
| 13959043.91 | 113213127.2 | 163151307.2 | 7207141.168 | 8806673.445 | 10008486.02 | 8987390.775 | 9617980.146 | 8828280.524 | 9423813.092 |
| 80128858.74 | 67682591.66 | 57283727.81 | 94277206.81 | 142055783.6 | 103780071.2 | 147216667.5 | 136272545.4 | 129410094   | 119694250.7 |
| 6084910.924 | 6278712.755 | 4510724.766 | 3462989.447 | 3992904.094 | 5128038.34  | 6524514.127 | 6751846.971 | 5001725.908 | 53152648.23 |
| 50488331.52 | 50977797.98 | 47078271.55 | 16530180.87 | 17719182.4  | 15646085    | 17574602.4  | 25890222.43 | 18814399.1  | 24103836.69 |
| 78522149.37 | 45752536.97 | 49746185.99 | 145903529.4 | 136736876.7 | 156536667.6 | 110818561.5 | 96054053.32 | 64591421.3  | 120222362.4 |
| 42010432.43 | 61576243.15 | 44425235.21 | 45708966.97 | 65157786.8  | 42806213.57 | 185232408.2 | 51167276.82 | 90130138.77 | 40902038.32 |
| 1855854.618 | 1565811.846 | 7966918.351 | 68826585.94 | 55258519.26 | 77938592.3  | 177738364.7 | 92479892.72 | 183317791   | 75738363.58 |
| 9194759.75  | 12898862.49 | 14460131.7  | 62730214.71 | 122188941.1 | 95656271.25 | 139013261.8 | 79466348.89 | 141333206.6 | 79103684.73 |
| 124192244.9 | 82122672.33 | 91336381.02 | 58345183.37 | 121994370.5 | 104792475.9 | 149566197.2 | 51965076.4  | 69228927.76 | 110952675   |
| 51267338.27 | 49940532.58 | 41359824.6  | 77885687.1  | 121857879.4 | 42522185.75 | 68423491.83 | 53204871.91 | 41306571.32 | 47993494.32 |
| 107135715.8 | 53273284.61 | 64677084.04 | 130280804.1 | 79241034.64 | 105715443.3 | 145639635.3 | 134146727.6 | 173732017.8 | 142128862.6 |
| 59691977.66 | 48002116.24 | 40183029.1  | 66747419.8  | 119327574.1 | 49749915.37 | 69738863.47 | 27406809.18 | 25082378.79 | 55568367.55 |
| 70422213.68 | 60437610.75 | 50110842.36 | 17141375.23 | 33145834.79 | 30040292.61 | 8337831.888 | 67200603.25 | 39505368.57 | 17044481.48 |
| 42771383.59 | 57147456.41 | 25182967.24 | 9206859.723 | 21842116.7  | 18889008.41 | 7279625.991 | 52552554.86 | 31497386.2  | 13241157.1  |
| 1902144.268 | 1000510.031 | 907907.3055 | 1123627.147 | 1321428.262 | 1483592.589 | 15291073.47 | 1209543.976 | 1829421.11  | 183858161.8 |
| 74661647.1  | 31202355.24 | 101814177.7 | 9905637.783 | 19527120.41 | 11903709.83 | 20946600.49 | 7753622.244 | 44221581.06 | 105252211.7 |
| 19391772.09 | 26168554.16 | 24936719.34 | 69321407.63 | 113710216.1 | 24241188.63 | 94999866.32 | 15424081.59 | 20460471.17 | 42746289.56 |
| 101544668.1 | 70120142.78 | 95142572.36 | 92537656.18 | 98170090.47 | 88010972.25 | 125669684.6 | 146915113.7 | 74240658.36 | 78922184.7  |
| 10255218.36 | 17026253.39 | 8839466.011 | 60138024.37 | 112828862   | 6869030.459 | 13960799.52 | 11550912.85 | 1777350.605 | 16590885.87 |
| 65387280.68 | 58908930.74 | 51270710.69 | 42005620.47 | 60893890.93 | 62138739.28 | 51685820.67 | 100530804.4 | 41049546.26 | 61112695.99 |
| 70827866.3  | 30389037.13 | 29833063.97 | 47746536.84 | 112005125.1 | 77714817.19 | 114243271.6 | 80691181    | 107847540.5 | 66719251.7  |
| 73451447.66 | 30726197.89 | 99552253.68 | 10369159.41 | 19512607    | 1845630.253 | 20752762.3  | 8506003.771 | 44681299.71 | 103866941.7 |
| 18467999.24 | 19117947.08 | 19266549.13 | 90035472.51 | 111264377.4 | 10290145.96 | 64733634.13 | 14143545    | 12467860.44 | 36525826.68 |
| 30409745.95 | 67395623.78 | 28917750.79 | 34018802.15 | 82311316.59 | 46452649.76 | 57773979.84 | 69727993.76 | 40383659.45 | 43502113.61 |
| 23378775.14 | 74142087.75 | 62881095.2  | 7660194.511 | 10433719.27 | 13376599.08 | 13153185.09 | 13893023.85 | 6922591.052 | 15349861.23 |
| 53498078.06 | 122518642.9 | 110721936.5 | 72339849.44 | 72911297.09 | 61010153.79 | 44148838.07 | 61452133.91 | 26301086.65 | 62339651.91 |
| 53695153.7  | 74206294.08 | 73016446.55 | 65897807.04 | 42147744.39 | 82231410.31 | 48216756.58 | 114901630.7 | 59447415.22 | 52587167.64 |
| 71174532.72 | 81452560.09 | 56856471.54 | 54935360.34 | 77467302.71 | 43219903.49 | 66313313.75 | 71198831.53 | 57973225.27 | 41385348.62 |
| 104444553.2 | 86044665.77 | 75593951.34 | 55195219.67 | 52324313.66 | 61698980    | 104646822.8 | 77809209.76 | 53340764.01 | 62524578.25 |
| 96848151.09 | 65670001.65 | 87517601.88 | 88956012.41 | 94897141.97 | 82514326.99 | 121087077.7 | 139508982.1 | 68663372.01 | 73219175.49 |
| 78078579.03 | 86281122.5  | 67961945.25 | 64175882.65 | 85708713.47 | 54897887.7  | 117362123.3 | 70364035.52 | 73927037.77 | 47334030.46 |
| 83015861.2  | 95285328.64 | 75440541.09 | 36435675.03 | 60871615.45 | 55492251.15 | 61134824.08 | 55960501.15 | 61337382.35 | 43651507.29 |
| 49773586.17 | 48943010.36 | 39081123.94 | 20104951.9  | 24985367.24 | 36065431.9  | 21683181.86 | 52627692.13 | 33840190.08 | 24362757.84 |
| 107108955.5 | 150085188.8 | 100948734.4 | 72678607.35 | 56736176.93 | 58108408.77 | 81983878.71 | 80248275.6  | 80576602.72 | 71469008.66 |
| 37278598.67 | 46679486.56 | 43957796.93 | 48049313.93 | 102363418.8 | 27773222.75 | 19264260.11 | 33400003.86 | 25849878.9  | 23984163.47 |
| 61233062.33 | 43953793.36 | 33960183.06 | 31269993.36 | 46926971.75 | 22733955.24 | 34981620.82 | 37945960.25 | 41939473.84 | 28538796.65 |
| 70986738.72 | 98913581.82 | 86928166.62 | 46522078.19 | 38461296.48 | 33548290    | 36705893.43 | 56313189.19 | 43871183.22 | 40330483.3  |
| 65353899.01 | 63412449.83 | 59266955.03 | 43503593.68 | 56068861.85 | 62912851.91 | 65865017.6  | 80977190.03 | 53513033.15 | 57429992.31 |
| 49428179.68 | 73639092.76 | 41489630.21 | 32858848.33 | 84106709.76 | 28322328.37 | 35303405.47 | 35017494.26 | 96735128.83 | 45386946.26 |
| 73396791.75 | 91039210.45 | 84036327.74 | 54819423.54 | 56035473.77 | 65051158.6  | 74577813.4  | 76373755.93 | 84073809.67 | 74781022.13 |
| 40357650.65 | 32168547.49 | 40664538.61 | 26222884.1  | 26045354.89 | 28569723.1  | 23271808.19 | 33244352.52 | 33410818.21 | 31508491.74 |
| 25352879.42 | 23599954.64 | 22821373.9  | 19763218.92 | 94874501.33 | 12238591.51 | 39872957.12 | 14072309.85 | 14739534.81 | 25167105.78 |
| 70453090.68 | 52989081.77 | 65377920.7  | 33020403.09 | 58211597.97 | 44048210.42 | 68855543.36 | 46779819.35 | 51974941.83 | 35264898.42 |
| 18555759.29 | 16950164.53 | 22017621.4  | 19699247.53 | 94396113.9  | 13533432.59 | 17031292.9  | 10020768.85 | 14776435.1  | 8890132.331 |
| 23871389.76 | 45627865.36 | 28427279.24 | 61562483.51 | 94091174.99 | 15041280.22 | 23716482.77 | 24051939.9  | 19921073.17 | 29373174.5  |
| 14731640.69 | 68321715.32 | 15198533.72 | 8846770.935 | 27285495.07 | 17944831.56 | 11418702.1  | 17413979.1  | 11205773.57 | 17759969.01 |
| 9961936.277 | 12278362.25 | 8944481.019 | 28421720.28 | 91793435.12 | 5317952.37  | 17309924.07 | 7122195.628 | 11117759.22 | 11396236.83 |

|             |             |             |             |             |             |             |             |             |             |
|-------------|-------------|-------------|-------------|-------------|-------------|-------------|-------------|-------------|-------------|
| 63888548.94 | 33869584.7  | 124527629.3 | 36320306.25 | 34775155.08 | 72332252.33 | 35290228.86 | 51909796.25 | 59933563.93 | 87921548.24 |
| 57842003.24 | 45894218.88 | 44849866.14 | 90394257.24 | 89359652.62 | 96335513.32 | 79271762.58 | 81594550.53 | 54115655.34 | 71671483.52 |
| 5561078.115 | 83605125.71 | 86023056.26 | 2468942.848 | 3190004.982 | 3259806.668 | 3401321.91  | 3033375.013 | 3203012.602 | 2344954.904 |
| 54214167.19 | 50702599.3  | 40368904.37 | 30882071.47 | 48577057.64 | 55529993.83 | 42263940.06 | 72578408.17 | 35855929.73 | 49203121.68 |
| 63712806.61 | 131912712.4 | 38127893.95 | 25167764.15 | 36105394.98 | 34690161.32 | 37534764.21 | 79278803.26 | 48699229.26 | 36851352.47 |
| 48439455.55 | 83138832.08 | 46682944.22 | 18948116.3  | 10456136.09 | 114320417.5 | 11232911.57 | 160158034.5 | 63571139.07 | 24843646.36 |
| 67892891.22 | 70758445.36 | 62904572.28 | 36277818.12 | 55648516.78 | 48310417.11 | 48529026.16 | 52813104.48 | 44697513.02 | 49655438.94 |
| 86444468.77 | 82653087.24 | 63136930.87 | 41040624.18 | 13803395.83 | 61992818.83 | 63393241.55 | 41429435.18 | 48775813.65 | 60217026.76 |
| 25035240.69 | 28434394.14 | 26974114.35 | 40972705.8  | 63803045.53 | 64124279.11 | 71760374.72 | 49542017.41 | 65176328.13 | 87155441.92 |
| 56904122.27 | 64570940.97 | 61980669.47 | 32991165.07 | 47469299    | 57321399.75 | 43762200.18 | 986038.6273 | 41264164.04 | 34350003.11 |
| 38626244.47 | 33289033.87 | 39652278.45 | 60655971.92 | 83935607.83 | 21397904.14 | 46295482.01 | 13661700.64 | 19980947.24 | 26119448.62 |
| 69110031.53 | 68005692.4  | 57594831    | 33227688.01 | 34241058.83 | 42577028.23 | 48090644.87 | 52108718.3  | 49891458.35 | 82623827.24 |
| 51883238.97 | 46267752.66 | 39355642.96 | 75199650.88 | 62227692.75 | 65529613.3  | 97591823.15 | 74712182.47 | 68836088.27 | 82212853.28 |
| 29810895.41 | 28748204.37 | 26190194.96 | 30673474    | 52159314.06 | 105798803.7 | 44919020.74 | 97258166.92 | 36371059.94 | 37296052.91 |
| 83457277.42 | 97543127.5  | 73619000.08 | 54278114.28 | 48827243.5  | 55080769.91 | 82183585.83 | 65097276.11 | 61686328.5  | 68758414.39 |
| 33359410.23 | 27348770.16 | 44673930.37 | 24362309.81 | 77948678.6  | 29474008.95 | 36638648.83 | 31319569.13 | 17626993.87 | 25541818.2  |
| 28907320.07 | 39491977.82 | 35432444.13 | 21074814.6  | 27854061.15 | 43016909.47 | 47456997.8  | 11363094.23 | 27915844.26 | 21521995.26 |
| 39065529.53 | 13378795.4  | 18892212.13 | 6145437.294 | 18397476.76 | 10537262.65 | 5182097.159 | 15957783.45 | 3310797.632 | 22599647.52 |
| 76561778.29 | 147722216.1 | 69104494.69 | 24480859.77 | 22379619.87 | 46561932.42 | 28145002.95 | 28781369.62 | 40750618.85 | 32058196.52 |
| 50547757.7  | 31600312.04 | 43122027.51 | 22735770.71 | 40658695.2  | 42690134.67 | 77962466.71 | 34708469.82 | 39079613.83 | 29001992.54 |
| 74566057.58 | 38441570.56 | 43351308.89 | 49765931.18 | 31149127.35 | 70823086.67 | 35862195.88 | 64110903.2  | 55864344.78 | 104058390   |
| 11554483.67 | 11630174.48 | 9999306.309 | 22571998.76 | 73540821.48 | 8419784.967 | 19290701.78 | 9991692.523 | 8132001.343 | 13894869.88 |
| 66360443.86 | 52497204.9  | 45829606.28 | 24316054.16 | 26597995.78 | 27823110.74 | 43065402.88 | 26880369.5  | 25832596.51 | 40622350    |
| 38220240.95 | 20441267.84 | 18037483.67 | 29658062.65 | 36118443.19 | 40985381.3  | 57736091.18 | 35571619.84 | 31140864.18 | 33321360.03 |
| 82025905.24 | 86774724.73 | 72365683.78 | 25921789.6  | 12860965.74 | 26180240.17 | 37940009.66 | 8944609.186 | 41165374.03 | 29072266.83 |
| 17296915.22 | 26274336.65 | 24643407.16 | 49057872.96 | 65933424.33 | 20696320.23 | 76469399.01 | 11690757.72 | 18177518.68 | 40133563.09 |
| 42481461.35 | 74603921.43 | 43999309.25 | 18056784.88 | 24052285.24 | 79805746.43 | 25002654.19 | 104435017.4 | 82707382.76 | 17876477.62 |
| 12561869.69 | 10986624.38 | 6376982.506 | 17776659.93 | 33554279.44 | 11418048.83 | 91550971.81 | 20150104.17 | 31706766.59 | 8276884.613 |
| 86120646.92 | 61837910.66 | 54749516.42 | 49121630.7  | 45937735.91 | 62459770.85 | 81433936.26 | 75031051.55 | 84228348.07 | 60707773.2  |
| 39953591.93 | 31075151.91 | 28238267.62 | 6131123.743 | 15577277.9  | 11197432.49 | 4715703.068 | 23465523.43 | 13589328.67 | 8158553.183 |
| 46428043.66 | 4300336.609 | 47672361.24 | 27075431.38 | 35469300.21 | 47240253.72 | 13935796.33 | 51148530.54 | 42556504.52 | 35289849.83 |
| 17343476.42 | 21969353.63 | 25087142.2  | 16438557.37 | 62929145.54 | 15742140.45 | 27063061.29 | 11236291.52 | 15023085.49 | 29237247.38 |
| 44995266.46 | 37191838.52 | 34052390.99 | 20797214.29 | 52521385.62 | 27061148.74 | 64375177.83 | 26565313.19 | 43647749.76 | 22697013.16 |
| 83220016.12 | 36693077.56 | 28669737.89 | 48905039.5  | 51507389.77 | 61217765.4  | 75576125.05 | 61517772.67 | 61673191.26 | 72073217.5  |
| 1285863.455 | 9605002.855 | 7405574.089 | 42248454.79 | 61402297.19 | 3609773.857 | 12522302.21 | 6629857.715 | 4685024.838 | 9736862.074 |
| 37123622.66 | 27614592.13 | 33961291.39 | 31671345.66 | 61185839.15 | 34316708.08 | 18394503.99 | 40927907.29 | 37913804.73 | 18058952.86 |
| 10889293.36 | 6809002.161 | 12019509.38 | 16277126.78 | 18972445.56 | 72503297.15 | 32632577.68 | 35120652.94 | 37983217.57 | 51278430.05 |
| 69400973    | 29465163.82 | 89584204.21 | 42768208.74 | 31880617.67 | 15742362.29 | 9964936.321 | 15560963.93 | 6273179.312 | 94480916.97 |
| 45737217.49 | 57598517.96 | 44025673.01 | 22275198.77 | 8873192.602 | 27084887.38 | 24038454.26 | 15611398.36 | 38109425.38 | 9908470.152 |
| 58939192.03 | 56217518.16 | 51628858.54 | 32876513.69 | 18680501.62 | 34941994.3  | 31395433.87 | 51252751.63 | 37531920.19 | 33808798.45 |
| 46826721.3  | 47525338.61 | 45692660.9  | 52592786.86 | 35145941.32 | 30416211.43 | 37198047.01 | 57747375.31 | 44427748.03 | 29633454.58 |
| 68762985.15 | 54120542.85 | 58512937.59 | 60728778.8  | 50237373.13 | 54545426.87 | 53302638.17 | 46014691.18 | 45506168.02 | 73913309.6  |
| 753935.0601 | 1674031.173 | 2865180.898 | 18869454.54 | 31501980.94 | 43583620.27 | 62268244.51 | 34264050.26 | 42932329.04 | 41793746.65 |
| 45979716.42 | 49384710.88 | 47722305.87 | 37745492.21 | 31420059.51 | 32418762.24 | 44953951.1  | 37770849.79 | 51703713.61 | 38870658.8  |
| 15477172    | 35683315.43 | 31581636.98 | 54881707.83 | 56910145.88 | 27027061.72 | 17834915.98 | 60336879.14 | 14772247.14 | 68786465.88 |
| 45941527.48 | 48545808.71 | 48317409.89 | 20684967.81 | 17093588.37 | 23880761.66 | 80383713.14 | 34957145.86 | 21109238.98 | 18675854.22 |
| 12872532.73 | 22950391.66 | 39714671.98 | 8691200.456 | 7595521.143 | 9021111.073 | 7221399.067 | 11196165.45 | 8061407.204 | 12470960    |
| 9655836.086 | 7227959.096 | 9683057.481 | 25218255.51 | 38341073.38 | 71661349.74 | 11422455.93 | 7751726.609 | 60626749.66 | 44564483.56 |
| 43129549.95 | 42641581.08 | 39893945.27 | 26162117.01 | 28674062.33 | 40270049.59 | 8440879.456 | 39865019.27 | 29538958.03 | 29704861.2  |
| 4807477.1   | 12792460.4  | 14361035.28 | 26861625.17 | 53437353.2  | 13950666.55 | 8544627.59  | 19259875.04 | 8520487.726 | 25505862.97 |
| 23115355.78 | 18021387.3  | 16219619.48 | 41295985.34 | 39219978.93 | 68710613.16 | 64792344.56 | 43462359.81 | 46663152.82 | 39033846.53 |
| 56863407.75 | 52233472.36 | 31395301.38 | 32901726.69 | 47555244.72 | 41858268.18 | 33168437.12 | 40363252.5  | 39637497.73 | 29970608.03 |
| 49570113.89 | 64779219.92 | 30969334.55 | 25234711.67 | 43513236    | 38337361.49 | 50855304.15 | 42925681.37 | 38983877.34 | 40835899.1  |
| 27486015.61 | 52158981.55 | 27680442.28 | 18677700.25 | 20650217.4  | 43117728.1  | 38961144.31 | 26449222.45 | 31930239.5  | 46308790.42 |

|             |             |             |             |             |             |             |             |             |             |
|-------------|-------------|-------------|-------------|-------------|-------------|-------------|-------------|-------------|-------------|
| 34926979.44 | 29356853.67 | 24087292.13 | 30878347.01 | 25923320.38 | 31734613.12 | 38531121.64 | 41683119.8  | 37655723.95 | 29677700.04 |
| 7579841.728 | 70175345.36 | 2617420.655 | 17975577.97 | 2633506.846 | 2029307.965 | 25235315.39 | 1123386.411 | 26647499.87 | 1333230.018 |
| 25708505.22 | 37804843.22 | 30953604.83 | 21962065.21 | 15936869.16 | 22351372    | 32018291.97 | 26594852.41 | 26305929.49 | 19217087.87 |
| 15447211.75 | 13144046.04 | 15333865.42 | 9479924.277 | 50317313.35 | 11736310.21 | 12618071.7  | 9688956.97  | 12254281.02 | 8783957.531 |
| 12687060.18 | 25095554.26 | 18857138.75 | 4772653.297 | 6208201.004 | 11275126.75 | 6578260.982 | 10374218.88 | 7551985.222 | 5034714.92  |
| 20811407.14 | 12174993.47 | 8898462.211 | 18031494    | 49489285.29 | 30534775.76 | 12615981.56 | 26180739.22 | 25867054.25 | 65028909.46 |
| 51971265.86 | 63408154.52 | 35425638.45 | 36065365.87 | 26131287.48 | 27949576.24 | 36943290.21 | 32630850.69 | 30434115.4  | 47571321.29 |
| 25116941.89 | 3565646.669 | 26754142.55 | 8979622.164 | 1598695.583 | 666183.9287 | 774556.0041 | 649322.9382 | 502911.1319 | 16874174.94 |
| 22537704.45 | 18937298.95 | 18886003.31 | 29355788.75 | 28851674.91 | 32645957.06 | 49643442.07 | 28278710.28 | 43194417.22 | 27760802.19 |
| 60697871.12 | 61609714.68 | 45482423.77 | 15615456.41 | 38899161.39 | 51359939.28 | 67689054.51 | 44612350.96 | 27885444.4  | 27009888.6  |
| 16510993.52 | 12290413.53 | 13972694.79 | 46991168.63 | 11694770.2  | 22357214.17 | 1553031.255 | 4535343.475 | 2448030.586 | 22358082.05 |
| 35609751.62 | 27052576.6  | 26649104.95 | 16451014.69 | 18064080.5  | 18801818.26 | 21121102.41 | 44275894.48 | 23562439.33 | 24843807.05 |
| 18691097.44 | 14445882.3  | 15574361.3  | 46975295.89 | 35847463.64 | 53544254.45 | 61087139.21 | 55682983.88 | 56848491.91 | 57876928.88 |
| 33755126.76 | 48747757.8  | 30048825.35 | 24690262.92 | 27072181.38 | 35656728.09 | 32651962.17 | 40786791.16 | 27996252.22 | 27545905.98 |
| 5800672.456 | 6838511.015 | 9484646.799 | 21537675.07 | 47052285.52 | 5347114.383 | 26751733.86 | 2476775.106 | 4416952.175 | 17652945.6  |
| 38597897.34 | 19654272.84 | 25498112.98 | 32811766.57 | 29694549.05 | 39036237.08 | 54416718.19 | 37985716.15 | 42427270.02 | 52866332.73 |
| 41821770.83 | 26115961.81 | 24623908.65 | 41213403.39 | 25475372.18 | 45412195.57 | 66471218.84 | 27715685    | 37406696.36 | 46342570.42 |
| 31266470.56 | 22621640.54 | 19360161.27 | 10958575.57 | 13974663.42 | 11925988.04 | 13226189.14 | 12322685.74 | 11596974.15 | 11057472.29 |
| 37861118.44 | 34007193.2  | 32395933.61 | 18465444.65 | 18676382.92 | 27373077.83 | 28949837.97 | 25054655.23 | 27201444.46 | 28309213.92 |
| 13765437.91 | 8388841.397 | 9972339.738 | 49509545.29 | 24599679.3  | 22416254.81 | 10821503.01 | 21283416.02 | 18302945.48 | 18036453.81 |
| 14440414.2  | 11539634.66 | 12008552.38 | 21987768.14 | 31713029.35 | 42960765.49 | 11350737.45 | 14122752.09 | 18922249.75 | 15432216.85 |
| 11551066.04 | 21005775.08 | 22236380.73 | 26147039.86 | 44924978.75 | 13534087.44 | 8311184.243 | 10311218.15 | 8904911.588 | 25161295.07 |
| 17982606.48 | 3345765.259 | 14075575.74 | 4502892.354 | 44441103.76 | 15593087.15 | 56695256.97 | 64293535.34 | 41290361.21 | 5643994.092 |
| 18458775.25 | 16172778.9  | 27080439.98 | 6553951.262 | 11420699.36 | 9934924.854 | 10401388.44 | 7677509.113 | 7672633.571 | 7519216.87  |
| 3494242.583 | 4608244.812 | 2989399.824 | 5369652.341 | 5500294     | 14840194.72 | 8526237.879 | 5780535.89  | 11595025.14 | 6460582.914 |
| 6299462.876 | 52977731.49 | 17885697.99 | 1501282.098 | 38513037.05 | 15967684.87 | 1338504.424 | 26329718.65 | 46178202.27 | 14146818.46 |
| 7520022.205 | 26407651.22 | 30622267.91 | 19588124.28 | 23877544.47 | 19497432.4  | 30358769.46 | 22164386.17 | 19758140.65 | 19471389.53 |
| 48834406.14 | 7316057.466 | 57956981.76 | 6769121.888 | 17036207.25 | 36057131.65 | 35831415.32 | 42582816.1  | 25113530.32 | 50336406.16 |
| 55967262.53 | 22860781.57 | 38323232.41 | 26399094.94 | 22778303.67 | 36738121.73 | 28525181.87 | 18254678.63 | 35008330.06 | 44895383.33 |
| 39926989.12 | 28539612.95 | 34185028.52 | 22537859.66 | 28023480.86 | 22405841.24 | 19630431.41 | 35281841.92 | 28102678.4  | 17936072.06 |
| 4625690.241 | 9476743.408 | 12403800.54 | 13549831.29 | 40641520.45 | 9762855.138 | 8621659.396 | 7714432.426 | 6227266.399 | 8096308.726 |
| 11138166.23 | 38690900.94 | 35591806.72 | 19324870.09 | 28547424.15 | 28604952.65 | 41800867.12 | 32548952.28 | 19586887.84 | 27796733.16 |
| 50926795.42 | 66895880.8  | 48817445.01 | 28539491.05 | 26594775.91 | 30233052.99 | 39580980.28 | 39220884.18 | 34884969.21 | 35198818.32 |
| 53993256.94 | 18257238.16 | 41562620.11 | 30983596.45 | 38916667.08 | 25188533.71 | 23926498.03 | 13040334.78 | 23371714.47 | 42792352.97 |
| 47244723.04 | 9687911.675 | 8091639.705 | 14855819.2  | 24959706.81 | 52407401.73 | 19118119.55 | 5048126.999 | 32551068.45 | 31056188.13 |
| 18121492.6  | 14085700.16 | 16408449.79 | 23069401.21 | 25861952.67 | 15071113.9  | 54154597.08 | 17976458.71 | 27175912.53 | 9642650.785 |
| 39067043.1  | 27131078.22 | 22486589    | 17415658.89 | 26892883.02 | 21280225.21 | 28202120.2  | 20871627.03 | 23324404.53 | 17174616.51 |
| 32928417.19 | 36658108.41 | 27505411.76 | 15172571.65 | 19586423.01 | 19303226.4  | 25457305.07 | 23923639.44 | 15722145.03 | 24751308.32 |
| 25067155.98 | 26043306.91 | 29335874.53 | 12344781.04 | 25110162.27 | 17078473.96 | 17852422.45 | 15909313.75 | 16994937.1  | 19826500.57 |
| 6108065.005 | 15041779.44 | 11760826.77 | 19760700.24 | 39451787.39 | 7927527.039 | 19779964.05 | 7896415.616 | 5096370.933 | 19433000.92 |
| 28676269.62 | 13495284.4  | 27314489.24 | 19548616.26 | 19155254.11 | 19886521.44 | 24433555.82 | 25792793.89 | 33215556.82 | 28928973.55 |
| 17144751.27 | 20039307.14 | 27968154.85 | 2675810.646 | 3841778.259 | 2175409.774 | 3699313.487 | 3521015.872 | 4003658.476 | 2892378.468 |
| 29907538.41 | 23516656.43 | 20316235.72 | 1084260.753 | 21327644.65 | 17717780.77 | 19559460.37 | 15582975.08 | 20411512.12 | 17403692.34 |
| 5661529.472 | 4518333.022 | 4343007.465 | 40985128.67 | 35566916.15 | 39600032.17 | 13209710.35 | 62097221.83 | 35982136.42 | 8770462.543 |
| 14728680.41 | 3882308.538 | 3660570.372 | 3173736.24  | 4349995.866 | 4015398.319 | 2889908.8   | 3553209.96  | 3748226.372 | 61983439.87 |
| 7321569.73  | 7066992.173 | 7955159.408 | 17962008.3  | 9134402.068 | 8039194.509 | 20307991.91 | 14661978.09 | 5787889.723 | 9658256.522 |
| 6001336.249 | 7425877.08  | 6210261.607 | 20251574.98 | 10938536.92 | 22017970.11 | 21441539.69 | 14342780.08 | 24636676.76 | 14030382.57 |
| 22016908.7  | 15156949.94 | 12783282.94 | 39472131.02 | 38251160.1  | 39213047.11 | 31407902.24 | 26237824.51 | 20612403.22 | 34219641.57 |
| 49668792.02 | 13228710.64 | 10260178.96 | 21395495.07 | 31006222.74 | 39556119.39 | 29366804.19 | 37819990.24 | 30782098.74 | 41962912.45 |
| 32346114.66 | 29418026.95 | 28232730.01 | 33202498.92 | 18350824.2  | 42232167.11 | 41090688.93 | 25106953.91 | 38576087.71 | 39507268.57 |
| 13226280.53 | 13869848.8  | 10959408.06 | 40025318.32 | 18022696.41 | 27081646.59 | 46793049.23 | 66839944.62 | 20576061.32 | 13985297.06 |
| 19345108.43 | 15797020.28 | 14821709.72 | 7546261.244 | 9900394.656 | 20299516.14 | 53519923.64 | 27865744.31 | 21955739.1  | 8270786.213 |
| 5893025.564 | 37704118.83 | 45049380.28 | 3153041.153 | 5108454.175 | 4598382.068 | 4432457.028 | 4024789.684 | 4703601.025 | 12455741.29 |
| 19188043.48 | 18325313.74 | 15812839.62 | 14316722.75 | 24994861.82 | 21472556.28 | 23532177.8  | 17680549.04 | 27431188.56 | 21552088.98 |

|             |             |             |             |             |             |             |             |             |             |
|-------------|-------------|-------------|-------------|-------------|-------------|-------------|-------------|-------------|-------------|
| 9396716.911 | 8804723.781 | 7764143.568 | 4185488.966 | 11063131.01 | 8136904.558 | 11167682.9  | 20558812.38 | 11225047.87 | 5371311.039 |
| 35694625.26 | 37402886.74 | 33157342.15 | 19143388.04 | 20254467.67 | 28063654.58 | 29334508.96 | 28766734.94 | 25437430.77 | 27659974.95 |
| 8577020.709 | 20196106.95 | 17900997.57 | 21586347.9  | 36743380.65 | 30304457.61 | 6925043.257 | 29988151.77 | 21734096.69 | 28101991.37 |
| 32282553.63 | 19592914.5  | 21463597.18 | 36158348.82 | 24880050.2  | 33013986.85 | 38748286.71 | 41880543.97 | 53414911.99 | 44467037.95 |
| 6824312.255 | 6860226.51  | 4231167.151 | 7061239.81  | 16183471.25 | 4216191.835 | 18010064.26 | 4255646.943 | 10586648.72 | 4282099.447 |
| 30897088.89 | 23963378.69 | 23074423.33 | 29492873.77 | 33046371.08 | 41958280.04 | 36579941.79 | 43857902.32 | 37950040.13 | 39260405.5  |
| 31128479.9  | 22182973.91 | 19466998.56 | 12695636.67 | 23138872.31 | 19028631.62 | 17677565.75 | 12687874.15 | 20183732.7  | 20247566.74 |
| 27381303.52 | 30504985.83 | 30688654.07 | 19048328.85 | 21411459.49 | 22112941.83 | 27586944.87 | 21278889.22 | 27298433.5  | 21879440.57 |
| 18862772.8  | 39124046.13 | 18468572.53 | 33134131.33 | 23367434.4  | 35702166.38 | 6036355.849 | 32544978.32 | 50750716.96 | 32538558.5  |
| 20395691.24 | 15375663.5  | 17571527.27 | 33729251.66 | 26580089.46 | 45223107.02 | 21062205.56 | 26909245.12 | 16198525.54 | 22427667.77 |
| 1885347.921 | 13071339.73 | 21118143.84 | 37144056.06 | 27823956.02 | 7939697.457 | 1397977.478 | 30295651.49 | 1937569.044 | 14401718.92 |
| 24458567.03 | 45959998.63 | 42623060.59 | 23982019.31 | 15111559.75 | 26932142.71 | 18922801.35 | 33851249.24 | 16489489.95 | 28202505.38 |
| 25261315.46 | 30035019.35 | 31974028.18 | 12918151.36 | 22884233.95 | 25084449.02 | 25921077.85 | 22302061.84 | 22020272.13 | 23075157.82 |
| 1148905.826 | 1215454.235 | 1071908.039 | 979313.4715 | 948318.4172 | 4087859.537 | 47918870.68 | 1208301.668 | 2399364.534 | 1229912.087 |
| 5118560.476 | 6375664.414 | 4923711.28  | 8577334.298 | 33865187.07 | 9524610.128 | 32064090.13 | 5296808.688 | 12790077.83 | 8444752.989 |
| 523178.0673 | 796619.1279 | 469186.5525 | 7608393.022 | 15529126.55 | 2159675.571 | 47647242.18 | 530488.6297 | 7855264.417 | 2039152.452 |
| 270552.4439 | 259477.3437 | 538417.203  | 34166423.24 | 33547046.73 | 2204003.997 | 38172645.95 | 42924038.23 | 33566475.76 | 231639.4094 |
| 966285.2058 | 10773439.07 | 5109725.135 | 3479374.302 | 2689879.551 | 3555247.195 | 8750474.011 | 6751115.836 | 1281426.472 | 2438807.291 |
| 16135288.84 | 18374364.5  | 14110800.35 | 25995628.25 | 33104388.02 | 11307075.29 | 18844359.51 | 13934692.53 | 11854375.8  | 14072450.97 |
| 43991768.59 | 23876778.9  | 31435334.04 | 14692399.73 | 19922073.97 | 25976124.62 | 22105602.79 | 28000349.62 | 34588982.63 | 34146139.67 |
| 36372528.19 | 41681381.53 | 36849730.48 | 21673917.97 | 20182806.53 | 15415953.33 | 17139185.84 | 35384336.81 | 31484993.82 | 13625078.75 |
| 34771161.9  | 23923496.71 | 36557615.03 | 8988387.006 | 9869668.385 | 31172101.53 | 12331378.87 | 20638328.8  | 28900621.67 | 6324062.454 |
| 43743209.32 | 21521591.53 | 25951780.78 | 17057378.53 | 22159495.15 | 24465150.41 | 20286814.86 | 17757218.73 | 21303833.8  | 23518632.77 |
| 28183490.81 | 38432069.46 | 34114595.01 | 12498652.45 | 21273073.96 | 14830523.44 | 19724866.76 | 44952041.85 | 16643423.88 | 9719508.873 |
| 17204058.37 | 21295902.6  | 17825725.33 | 11357934.42 | 19446810.3  | 12558656.19 | 21237818.01 | 14709504.84 | 47363595.01 | 16721641.76 |
| 8629921.115 | 11142137.96 | 9395580.628 | 13299590.92 | 32100102.39 | 6263039.329 | 30983083.46 | 9198832.363 | 14811097.12 | 7822682.553 |
| 15628486.1  | 12948061.35 | 14940216.85 | 34369822.34 | 15248650.99 | 16550762.9  | 15882336.3  | 8036330.141 | 19742999.83 | 11567828.6  |
| 11068791.52 | 6871471.55  | 6806479.822 | 20147275.18 | 20496120.25 | 23080768.15 | 25205632.07 | 33906275.88 | 22571145.89 | 24908996.83 |
| 26199951.53 | 21480476.62 | 17581191.48 | 6914689.546 | 7803539.577 | 13824992.52 | 9729777.571 | 7334625.444 | 11205006.72 | 12324734.12 |
| 41729349.25 | 13587753.6  | 11112516.96 | 9205574.504 | 27730523.31 | 10560805.96 | 11987467.87 | 19957036.37 | 20594727.95 | 20051512.11 |
| 30370958.25 | 26283456.71 | 28480960.03 | 24198540.89 | 28125477.21 | 32244933.92 | 23272184.81 | 22552624.93 | 30812162.36 | 40682016.43 |
| 12678713.44 | 60243563.37 | 11807475.99 | 25864403.47 | 8111707     | 13274359.4  | 24751146.02 | 36871788.5  | 21298912.05 | 25910905.87 |
| 27991378.59 | 19711698.63 | 20313483.71 | 27657087.12 | 29721867.55 | 33077893.29 | 30082782.73 | 30844141.35 | 30586593.63 | 30040019.33 |
| 4395484.677 | 3624249.34  | 3383691.241 | 32559766.33 | 6625326.674 | 23192203.76 | 13200653.71 | 13702167.66 | 19324288.53 | 11375999.46 |
| 2729446.987 | 12940321.6  | 3288543.528 | 25410373.5  | 11548106.25 | 34098382.04 | 35586902.34 | 38585934.77 | 23052005.55 | 11924681.6  |
| 12467432.79 | 15804229.98 | 12495994.5  | 31396158.08 | 17389512.39 | 9859000.439 | 18286412.13 | 29231678.9  | 19386690.62 | 15933939.21 |
| 2669330.085 | 3083999.924 | 2933935.224 | 2484475.273 | 3196688.455 | 4489246.555 | 41103170.88 | 3135597.888 | 15295301.16 | 3203172.685 |
| 9218201.413 | 23818671.16 | 22279409.54 | 3898817.261 | 4327436.691 | 4254111.546 | 2343094.751 | 4179938.387 | 3844971.034 | 5511626.659 |
| 21958764.61 | 11124785.42 | 28427192.63 | 3263285.13  | 4867353.482 | 25202112.38 | 14527378.22 | 13801560.99 | 14635650.64 | 5038502.748 |
| 9700885.308 | 14175196.85 | 9880670.229 | 13588976.27 | 14143286.08 | 13642219.36 | 23334053    | 14726476.85 | 9090504.37  | 14080320.78 |
| 9320442.897 | 11219734.34 | 9779801.192 | 11420151.91 | 27962981.29 | 14344174.83 | 11190298.49 | 15472497.97 | 28150527.54 | 15437764.31 |
| 5425238.101 | 4282718.611 | 5560882.866 | 2462933.76  | 3206567.371 | 3790996.322 | 3979163.863 | 1405936.258 | 3344750.746 | 3464033.064 |
| 32616525.33 | 11537009.43 | 13171536.22 | 14645298.7  | 27697608.95 | 16991892.01 | 6210050.832 | 19297118.82 | 19372665.17 | 8014917.41  |
| 6120278.458 | 4768442.192 | 4919653.212 | 2556350.373 | 2297162.329 | 5135785.426 | 9898636.886 | 6405838.658 | 10566822.89 | 4174931.682 |
| 11888279.82 | 16998456.51 | 19689674.25 | 19836060.29 | 13630548.75 | 31395700.71 | 20933624.34 | 6777178.433 | 33462925.23 | 21847975.37 |
| 24345408.17 | 52236078.16 | 22561265.08 | 17976652.4  | 14383014.03 | 15629600.98 | 27057407.1  | 17629716.4  | 21028964.88 | 34566693.56 |
| 4898892.512 | 3954355.797 | 3221615.471 | 5737605.577 | 12586745.08 | 12833000.67 | 37438312.34 | 7688604     | 23873432.42 | 3438677.86  |
| 16264901.73 | 22151930.35 | 2169763.854 | 26095425.79 | 3675766.172 | 12025843.55 | 3327823.312 | 12734729.93 | 9506511.807 | 23121926.95 |
| 15785553.1  | 13037597.83 | 13210834.23 | 26604048.61 | 26384798.42 | 11757815.67 | 15672385.85 | 34301894.27 | 22270721.46 | 13267553.64 |
| 2175513.132 | 2491822.254 | 2210068.404 | 28160972.07 | 1790603.181 | 6821656.363 | 2229331.51  | 2152407.827 | 21127588.8  | 14832926.17 |
| 2735584.028 | 2319528.919 | 2185590.134 | 7259275.009 | 3654744.24  | 5001825.545 | 12119262.58 | 4146970.491 | 9762791.313 | 13044529.3  |
| 16964636.23 | 16979198.98 | 14967120.88 | 13021154.07 | 13383316.92 | 13429507.23 | 13839118.51 | 10583287.11 | 12881539.26 | 3348991.668 |
| 9123514.468 | 6489465.636 | 3147609.482 | 4055976.091 | 4263422.002 | 6917874.861 | 36184901.47 | 6268541.822 | 10756809.23 | 1675672.283 |
| 9352159.672 | 7770027.071 | 6533675.412 | 19071858    | 11554646.61 | 17420287.55 | 15509837.32 | 14916142.38 | 8855242.807 | 34792087.41 |

|             |             |             |             |             |             |             |             |             |             |
|-------------|-------------|-------------|-------------|-------------|-------------|-------------|-------------|-------------|-------------|
| 12531273.7  | 41548692.93 | 10971821.34 | 7246407.102 | 10661147.06 | 8046167.812 | 10850803.86 | 9726070.106 | 12269222.91 | 10081403.29 |
| 14530954.05 | 8588173.356 | 5866252.333 | 5078880.128 | 3436895.449 | 6156324.718 | 3469848.883 | 45173230.04 | 3682376.855 | 4928260.834 |
| 15249046.41 | 2679574.122 | 11331125.22 | 9149965.656 | 10926439.48 | 10159118.67 | 8451361.517 | 42285558.22 | 15058759.69 | 20212768.99 |
| 9272094.124 | 11996085.71 | 11992316.58 | 10593243.45 | 24243672.62 | 8099834.083 | 10101759.2  | 7778098.966 | 7181819.497 | 11961486.37 |
| 19142757.06 | 21198169.48 | 17247868.23 | 9519798.324 | 16759239.56 | 15537808.22 | 11668568.55 | 17275948.58 | 12285673.8  | 12486853.68 |
| 15696809.5  | 7195506.099 | 16313763.04 | 7674339.705 | 16603591    | 21959912.18 | 11367776.43 | 5310094.204 | 9139688.516 | 32760479.79 |
| 14269620.51 | 8695341.087 | 10471357.69 | 8454228.501 | 10114236.24 | 9408202.325 | 7768006.593 | 41378632.52 | 14305721.45 | 19408279.96 |
| 13024813.29 | 12870980.04 | 10327031.22 | 16362089.69 | 9522127.836 | 9409347.032 | 19435602.08 | 15827894.47 | 26984492.4  | 10210190.51 |
| 8645842.35  | 6491033.456 | 4997673.137 | 22674989.27 | 23550615.47 | 24488451.78 | 19618628.16 | 10367692.26 | 919612.0297 | 35924014.93 |
| 11299525.31 | 11251517.48 | 12790295.59 | 13632610.09 | 20208865.5  | 4054844.034 | 9591947.407 | 8612667.997 | 9716045.495 | 6012057.651 |
| 20752429.88 | 27119075.43 | 20138138.09 | 16158981.42 | 18155199.62 | 21526022.97 | 32953178.28 | 26916073.89 | 19376105.55 | 19123426.2  |
| 718759.4937 | 2409508.839 | 1267481.364 | 840798.3119 | 678969.2886 | 617713.2546 | 1213014.18  | 697356.6327 | 719674.7456 | 972106.2134 |
| 18769105.14 | 8468283.376 | 12455959.21 | 16115812.51 | 16563044.57 | 15687956.63 | 14099661.42 | 13763642.45 | 17865205.11 | 19265853.34 |
| 30122901.84 | 19872116.34 | 19570343.97 | 3800078.488 | 4928078.376 | 7798871.351 | 4262090.935 | 7703575.258 | 6024790.474 | 7704463.601 |
| 14127006.24 | 12674416.93 | 16304294.42 | 11070929.96 | 13091245.93 | 9709311.246 | 12639762.9  | 12456016.05 | 13341841.65 | 11720005.1  |
| 21718600.4  | 20433018.52 | 22166832.52 | 12225293.37 | 13330279.38 | 12464118.18 | 15628118.73 | 14415123.86 | 12232429.16 | 17164083.24 |
| 12891860.93 | 12953305.37 | 9745028.035 | 16871311.55 | 20136198.03 | 14790661.12 | 31219707.75 | 21287576.03 | 13585242.86 | 22175733.91 |
| 4260168.229 | 4475084.909 | 3377809.108 | 7090457.436 | 13874285.18 | 3566364.397 | 12039590.02 | 6058174.001 | 7681544.718 | 6978848.913 |
| 1965203.426 | 3624376.693 | 3146686.779 | 5654907.844 | 21631316.64 | 1858070.798 | 6203316.468 | 1529359.238 | 1224552.206 | 3238457.505 |
| 12674210.78 | 22995438.39 | 11591777.96 | 19779262.46 | 14543916.62 | 21820873.33 | 4731783.387 | 25038204.34 | 31461080.54 | 19270793.69 |
| 28855644.95 | 15669610.9  | 16536449.63 | 1129452.968 | 765458.2306 | 6325974.451 | 1775954.97  | 14456384.37 | 3477828.7   | 2942230.198 |
| 5100059.185 | 8340467.644 | 4176626.595 | 6005739.481 | 8837278.414 | 6664736.454 | 7206652.935 | 4370660.378 | 7873649.747 | 6025561.798 |
| 1744818.474 | 4262171.08  | 7894369.714 | 16500420.61 | 14705747.49 | 7336614.225 | 1002714.193 | 13314364.97 | 2372322.222 | 7477491.414 |
| 2821245.855 | 3215717.988 | 2023721.577 | 22530320.26 | 2780130.863 | 4467649.092 | 3759072.095 | 5594262.111 | 12659108.02 | 1807383.099 |
| 17484494.82 | 19733919.63 | 17033821.12 | 10589573.65 | 6647387.854 | 11052136.18 | 13331545.47 | 14091412.01 | 15536463.37 | 14677789.1  |
| 12757188.81 | 10555305.83 | 8736250.95  | 15189331.22 | 18249097.69 | 15178531.58 | 1165930.717 | 14069011.67 | 11720865.91 | 14428692.55 |
| 17406361.02 | 19818119.52 | 16406305.49 | 10394621.41 | 8588684.424 | 5405935.628 | 10517398.91 | 10724960.21 | 12615803.98 | 13748026.97 |
| 21019689.41 | 26489570.63 | 21907563.63 | 15952431.37 | 18681810.3  | 20755773.29 | 24611728.02 | 24548246.19 | 20058675.8  | 22781939.82 |
| 8256776.578 | 10477036.08 | 10000099.89 | 4108639.273 | 4406181.508 | 5535294.53  | 3086122.595 | 4779839.699 | 2467771.528 | 6879713.29  |
| 11480118.77 | 14417633.81 | 12609753.89 | 11923482.43 | 12041674.95 | 8828356.363 | 13874473.19 | 13367333.6  | 9935934.497 | 22556361.77 |
| 563264.6407 | 686863.2584 | 568231.4541 | 2273606.175 | 3645800.992 | 7070124.392 | 3899164.148 | 4547223.831 | 7458087.316 | 3062978.211 |
| 14427229.34 | 14095105.91 | 15440642.03 | 13940077.05 | 11059659.78 | 12911504.21 | 19223696.98 | 12326517.67 | 15075925.62 | 15582681.47 |
| 8503849.182 | 5303131.928 | 3031015.423 | 2921404.878 | 3496437.535 | 11148258.15 | 2018678.267 | 3187367.282 | 3191836.112 | 5901639.718 |
| 15075759.35 | 24843196.45 | 18999483.05 | 15171111.56 | 8766630.171 | 17667808.75 | 10649885.88 | 21512798.36 | 9202119.036 | 21461203.37 |
| 850817.5428 | 1673327.759 | 968784.6158 | 7065920.332 | 2992103.417 | 2905747.597 | 24320796.15 | 920943.729  | 1288313.151 | 3423306.267 |
| 732188.9146 | 1422916.88  | 1849618.033 | 727022.8992 | 752824.3253 | 543011.2588 | 3148044.13  | 731549.4047 | 350352.0808 | 738656.339  |
| 7188643.707 | 11198098.18 | 5205001.735 | 17923275.8  | 12314119.49 | 4427386.605 | 12856043.59 | 9436536.144 | 16866808.57 | 4684178.363 |
| 6349672.778 | 7275805.773 | 7639555.097 | 8348900.953 | 952082.4489 | 4333764.339 | 4001668.077 | 8203512.532 | 4703233.108 | 8190694.072 |
| 17061823.96 | 11159261.8  | 10837707.36 | 11224006.38 | 13951188.52 | 18384915.02 | 20982294.9  | 14784492.45 | 17812715.08 | 21271281.29 |
| 1949961.298 | 13962913.48 | 12077209    | 1330444.892 | 1581226.11  | 1876543.185 | 1693727.68  | 1514546.894 | 1269610.004 | 1571884.25  |
| 565510.6128 | 1381513.119 | 3191012.269 | 7675835.109 | 16227069.14 | 1333237.33  | 1141030.236 | 796535.8044 | 547185.6754 | 3458898.39  |
| 1291853.614 | 1741111.164 | 1374065.218 | 7042944.406 | 3143230.295 | 12680328.95 | 4686511.743 | 14348152.75 | 8803010.732 | 13651191.4  |
| 2354822.108 | 1950322.012 | 4349572.313 | 8002959.432 | 15966950.23 | 1104618.604 | 1639093.204 | 1333006.248 | 2166601.062 | 2534433.135 |
| 14705268.08 | 9407845.818 | 7414140.306 | 3196740.369 | 4968918.298 | 7650764.303 | 4584896.354 | 7237575.357 | 7761394.636 | 6307800.044 |
| 11186088.86 | 12653809.79 | 13819849.55 | 5871574.146 | 9084957.409 | 8503007.216 | 7672386.63  | 6628831.821 | 8237555.863 | 6038259.779 |
| 8708187.945 | 14782009.14 | 19180421.88 | 1253658.9   | 1048055.019 | 1046656.31  | 1197628.572 | 1118513.714 | 1646131.244 | 1098882.676 |
| 8093536.661 | 11498671.24 | 7527027.675 | 11933077.3  | 9864358.058 | 15977269.78 | 20336367.32 | 21245683.29 | 20909401.43 | 14374070.67 |
| 13347765.46 | 6322856.603 | 5976963.629 | 4443456.014 | 4892203.907 | 19126025.27 | 3176505.48  | 5751161.034 | 4949491.682 | 3164670.129 |
| 7769588.015 | 13955439.68 | 17397722.96 | 10566572.32 | 6083289.316 | 12719019.95 | 4240835.392 | 8649929.6   | 15268009.14 | 6075806.191 |
| 1329415.474 | 4302310.542 | 3280984.967 | 13253847.62 | 5632664.426 | 3670729.547 | 13375763.43 | 7880462.407 | 1225424.422 | 3064849.507 |
| 6495972.666 | 9483803.14  | 5839617.829 | 8124645.564 | 13783277.11 | 6819390.834 | 8889418.709 | 7498662.291 | 5995141.581 | 7267293.518 |
| 8770476.131 | 27847370.02 | 13130530.97 | 2053753.418 | 1437133.448 | 6259109.365 | 1804987.946 | 20057599.54 | 4344814.041 | 9099567.646 |
| 6885321.371 | 8219711.271 | 6823108.541 | 10127720.79 | 10012436.93 | 13315969.46 | 16190335.83 | 18156872.35 | 20549241.69 | 8841880.691 |
| 3111554.845 | 1592386.512 | 1404324.289 | 2491655.81  | 1812790.207 | 2406232.624 | 19797524.59 | 2410887.465 | 6709189.394 | 1804086.825 |

|             |             |             |             |             |             |             |             |             |             |
|-------------|-------------|-------------|-------------|-------------|-------------|-------------|-------------|-------------|-------------|
| 5060423.853 | 9154831.817 | 1767412.174 | 13038855.03 | 1616426.748 | 8450233.82  | 2913109.695 | 6400943.083 | 2713387.175 | 11452957.82 |
| 8171900.179 | 9511721.218 | 7482517.026 | 8734847.49  | 13812849.69 | 13737887.36 | 17091195.61 | 1053039.075 | 17916865.1  | 16235547.68 |
| 7626302.661 | 13025381.52 | 11251363.88 | 4329083.735 | 8563679.013 | 4740022.86  | 8283805.582 | 2542528.887 | 5814586.334 | 5894693.894 |
| 1012434.203 | 2637320.899 | 2136628.062 | 4258013.481 | 13550898.93 | 1250627.017 | 2861953.401 | 2187865.503 | 2804668.2   | 4100012.47  |
| 8013882.662 | 1714484.59  | 413253.6253 | 7105650.555 | 4908940.048 | 1093207.105 | 19130980.51 | 1080515.362 | 2086364.25  | 1120683.745 |
| 4535547.92  | 2936123.528 | 2732476.171 | 6005465.008 | 3805247.262 | 10551837.75 | 3148287.588 | 5241082.504 | 4957078.314 | 7686663.638 |
| 933899.2518 | 910759.0985 | 1073271.716 | 4864982.009 | 913444.3057 | 916030.3875 | 985093.9814 | 386662.6385 | 467496.4494 | 20841588.95 |
| 1783625.556 | 1612215.206 | 2765124.368 | 1568615.386 | 13008260.53 | 1464924.484 | 909712.5006 | 1534030.789 | 1054586.09  | 3138258.649 |
| 3556113.148 | 3782389.267 | 1475848.807 | 1610633.191 | 4351182.755 | 1464906.739 | 16145512.6  | 5241141.007 | 18628542.2  | 649966.9309 |
| 5992446.773 | 5400085.197 | 5541114.036 | 10371325.81 | 8153818.315 | 8150459.406 | 9110952.255 | 9063717.448 | 10117127.05 | 12151021.21 |
| 2116542.063 | 810825.4344 | 715066.25   | 1512062.447 | 1323070.552 | 1599997.365 | 17841539.42 | 1513776.866 | 5132926.186 | 982480.4146 |
| 1554725.774 | 2023024.704 | 1384360.243 | 2219805.091 | 12521141.55 | 3991107.068 | 14775461.93 | 1261724.457 | 1460131.403 | 2422768.33  |
| 4829225.196 | 12064031.7  | 3966190.418 | 13429149.58 | 7729427.853 | 739210.9983 | 1903905.782 | 4779760.024 | 1239539.327 | 1630067.968 |
| 501163.9043 | 514346.3427 | 442838.3677 | 3942425.552 | 9549046.821 | 994995.6022 | 1442736.795 | 500697.8943 | 1225060.55  | 786184.2571 |
| 2074036.76  | 2530739.347 | 1989119.2   | 3245943.445 | 4546751.994 | 8488084.135 | 3540248.688 | 4437280.747 | 9673515.671 | 3742691.012 |
| 3975053.036 | 6911483.85  | 4556066.272 | 9348713.176 | 9573891.414 | 2118241.847 | 10171060.48 | 2759756.694 | 2955536.912 | 7113967.252 |
| 1522138.154 | 2112909.679 | 2450558.868 | 10865491.04 | 11725492.06 | 10885773.94 | 11159952.58 | 10839806.42 | 10864563.59 | 7249833.067 |
| 7432000.362 | 9482587.197 | 5305339.147 | 3904315.068 | 5270905.459 | 3108150.591 | 5718706.901 | 5153734.731 | 4262831.272 | 3765453.807 |
| 12069590.31 | 7236919.648 | 14693658.54 | 6419601.824 | 5172286.681 | 15098596.5  | 4669910.714 | 4369115.882 | 11747997.6  | 6465687.478 |
| 3259887.76  | 7677311.204 | 8384880.45  | 1396889.694 | 1663393.639 | 1522222.82  | 1515106.12  | 1839937.689 | 1403348.334 | 2199051.943 |
| 354851.8266 | 515141.4711 | 356803.3298 | 11247150.39 | 9985908.888 | 10331892.34 | 15584895.8  | 10688441    | 16528895.31 | 9017917.36  |
| 9937633.864 | 11093925.98 | 11140151.16 | 8850553.8   | 11224011.43 | 10978341.12 | 10251117.26 | 10886232.45 | 10240432.37 | 8453801.678 |
| 8360496.882 | 9426600.323 | 5069125.509 | 9611462.262 | 8352645.562 | 6082645.399 | 9904021.37  | 4838322.267 | 7808577.083 | 4157578.04  |
| 9594531.213 | 13405852.65 | 13868315.07 | 5133971.348 | 5570996.904 | 8302146.575 | 9441751.493 | 7883503.138 | 7791276.393 | 7541726.018 |
| 7522725.393 | 7178096.73  | 9092884.193 | 2920627.257 | 4877958.709 | 5767117.586 | 5255112.515 | 4550890.194 | 4121680.38  | 4783782.377 |
| 5839788.427 | 7896059.915 | 6524632.819 | 4319383.536 | 10917329.37 | 4447613.431 | 12912270.85 | 4841146.714 | 5232838.096 | 4254600.716 |
| 6432669.4   | 5619383.001 | 5186633.554 | 3406664.45  | 4293518.173 | 4321206.359 | 7487429.657 | 5840464.004 | 4056991.342 | 16907824.84 |
| 3228805.007 | 2863998.117 | 6131829.29  | 1065291.332 | 489470.3303 | 1016150.274 | 360695.2002 | 435458.3011 | 540451.5874 | 923024.4857 |
| 9889957.445 | 6398551.052 | 7586469.547 | 4943975.87  | 6446903.755 | 6173425.658 | 6596405.825 | 7529331.976 | 6020281.068 | 4350795.938 |
| 6934752.822 | 6046453.246 | 5062730.799 | 4127440.597 | 6025022.633 | 4581428.79  | 7009673.224 | 4585481.161 | 5323989.224 | 3690942.192 |
| 2190722.87  | 3084232.094 | 3037768.426 | 7739561.435 | 10483016.49 | 2634151.968 | 6017980.05  | 2221554.874 | 908460.4496 | 4184701.044 |
| 826257.7871 | 849497.2569 | 603139.293  | 491536.2556 | 388563.5269 | 410585.0644 | 475012.8216 | 625622.8367 | 423666.6527 | 16482908.06 |
| 3717994.431 | 5695628.474 | 3050846.719 | 2450422.114 | 2759846.927 | 2349429.834 | 7245412.107 | 2822356.186 | 2650567.538 | 2224210.062 |
| 4665301.011 | 10064596    | 3127023.549 | 5457682.477 | 2686189.939 | 3003807.557 | 4327054.568 | 4807003.804 | 3410885.282 | 2250683.871 |
| 677847.6287 | 1767885.541 | 766171.5525 | 2005072.537 | 3160009.377 | 370500.5366 | 13800576.17 | 1937539.049 | 632014.2092 | 5943948.603 |
| 2244896.852 | 17462750.96 | 6458081.777 | 7167469.638 | 3509808.096 | 2405245.023 | 4293170.079 | 8860884.925 | 4433422.894 | 2757867.828 |
| 8742390.575 | 5244121.861 | 4732950.634 | 8539767.436 | 9665057.843 | 9643887.607 | 5594216.898 | 5746271.608 | 7015700.319 | 10846456.1  |
| 9575597.096 | 6769940.463 | 3539999.92  | 5498391.289 | 9646201.54  | 6101365.196 | 4502259.789 | 4424832.221 | 5356940.42  | 6534671.504 |
| 5429649.459 | 2425410.471 | 5425130.526 | 2845520.504 | 6000766.423 | 8237165.083 | 7224271.956 | 2542522.027 | 13234104.04 | 1937795.858 |
| 2317873.277 | 7040272.751 | 6901027.416 | 2057914.685 | 3210144.23  | 1578394.811 | 1724470.367 | 1338390.117 | 1458074.624 | 1605441.124 |
| 2326453.614 | 3545859.35  | 3686303.156 | 2789264.661 | 4352514.089 | 3559334.48  | 12989304.36 | 1228940.413 | 1880038.476 | 3720103.004 |
| 564697.6228 | 628501.3187 | 516189.0946 | 5628981.733 | 3879441.471 | 511657.3627 | 5184992.725 | 831363.8168 | 2405673.514 | 781524.2978 |
| 5952293.188 | 4035317.051 | 4498573.451 | 2594846.957 | 4557201.174 | 3610937.526 | 4691205.346 | 5184000.406 | 2908899.672 | 5112751.333 |
| 8485225.076 | 11364008.63 | 5040144.67  | 5505081.319 | 1116963.209 | 3317417.614 | 8392358.824 | 10012151.57 | 10245412.27 | 2862337.919 |
| 1110851.809 | 577437.7465 | 1196452.081 | 773338.7697 | 9001000.657 | 1658800.204 | 7579514.499 | 951253.2577 | 2401807.296 | 2150034.339 |
| 11890777.81 | 1791607.425 | 1978722.104 | 2561710.692 | 1654303.666 | 1266356.371 | 5735354.327 | 1198009.559 | 1918557.308 | 4014157.768 |
| 5736322.737 | 5586390.125 | 7335835.853 | 3682029.658 | 4860142.8   | 4597371.575 | 3629995.081 | 4955783.712 | 3881217.786 | 5021311.708 |
| 1487970.216 | 818975.8409 | 1981146.942 | 1085545.828 | 687070.2964 | 734047.6499 | 1224685.534 | 3617796.214 | 974501.9435 | 2555548.658 |
| 4199515.326 | 3376999.049 | 4026375.252 | 1956284.398 | 4985963.289 | 2983285.143 | 2509801.71  | 2682180.514 | 3027972.793 | 3742062.511 |
| 10908310.23 | 11650956.21 | 5825827.755 | 4533180.124 | 1200905.087 | 1693238.795 | 1936738.023 | 9237483.836 | 4824697.138 | 1186560.409 |
| 1427340.768 | 2798263.765 | 3955454.744 | 5383420.669 | 5787163.816 | 6932594.861 | 1825782.834 | 6356597.216 | 6833753.364 | 3183895.24  |
| 4144167.081 | 1598017.435 | 3198592.897 | 3190495.646 | 8454252.6   | 6803127.773 | 6887982.776 | 3414098.711 | 5117600.52  | 6611677.056 |
| 9320193.48  | 9112487.643 | 6282274.417 | 4610750.673 | 8161189.485 | 9812810.312 | 4371231.37  | 4722560.822 | 9852233.471 | 6981913.537 |
| 4885114.316 | 6751815.323 | 3539125.489 | 8939960.495 | 7014075.444 | 2559143.509 | 3004752.488 | 5464294.199 | 5345516.285 | 3163099.109 |

|             |             |             |             |             |             |             |             |             |             |
|-------------|-------------|-------------|-------------|-------------|-------------|-------------|-------------|-------------|-------------|
| 2088832.37  | 1496136.21  | 4405313.979 | 3723992.404 | 5992383.843 | 6367370.05  | 2362481.263 | 9182884.576 | 6034065.536 | 7908064.479 |
| 2913884.379 | 5052384.837 | 5973086.606 | 631276.5226 | 879762.904  | 814109.5575 | 885618.8134 | 914379.7379 | 820692.5929 | 974408.6374 |
| 2661558.688 | 6834014.499 | 5365057.851 | 2724285.098 | 5281458.31  | 5871463.633 | 6283144.961 | 5607654.431 | 4969122.199 | 5457569.25  |
| 1005407.224 | 580277.4763 | 440218.1703 | 490494.277  | 346936.0298 | 1294240.781 | 6230576.305 | 739063.008  | 11595455.56 | 297749.2688 |
| 4751685.122 | 3232215.753 | 3471702.593 | 895508.3465 | 6566277.484 | 5579004.43  | 8114344.17  | 14305143.44 | 9233881.984 | 3188653.246 |
| 5801854.697 | 4942402.747 | 6985838.137 | 5065293.149 | 1839999.921 | 4019378.746 | 3356211.031 | 4663908.734 | 11331110.45 | 7567214.389 |
| 2388686.934 | 3640526.867 | 2352642.631 | 3359020.338 | 2591032.149 | 2154345.345 | 2514741.31  | 3259810.322 | 2455106.171 | 2074674.985 |
| 7414220.469 | 8144496.305 | 7698903.785 | 894594.6726 | 2633840.084 | 3943801.575 | 1195063.378 | 2832307.206 | 2297445.073 | 2168751.165 |
| 8714544.186 | 7490030.126 | 5986625.141 | 8151758.57  | 3890099.121 | 6657732.068 | 10503095.97 | 7500755.497 | 7466079.798 | 9458470.73  |
| 4033834.436 | 4129111.183 | 4212463.036 | 3748890.862 | 2369347.379 | 1940557.704 | 3626996.477 | 3829562.473 | 3102431.268 | 3865858.834 |
| 2144082.65  | 2429139.105 | 2938360.679 | 1640390.536 | 1863663.399 | 4516872.302 | 2868641.111 | 565686.7065 | 1538848.945 | 6105523.095 |
| 4277216.547 | 2885504.501 | 4253077.083 | 2629111.81  | 1452239.82  | 6108836.803 | 6362239.196 | 6995661.308 | 4469601.665 | 2198304.964 |
| 1606885.499 | 2325236.216 | 1224822.344 | 4170867.112 | 6022484.99  | 708821.4858 | 1290317.865 | 1806936.228 | 984625.1532 | 1213652.085 |
| 5619883.013 | 4474391.712 | 2416204.052 | 5142031.627 | 4666706.115 | 3662940.227 | 4741149.117 | 2634096.224 | 5141037.233 | 11329011.29 |
| 9363932.653 | 5658617.256 | 5844694.656 | 1337799.792 | 2229311.034 | 5397353.212 | 2257972.614 | 1925977.306 | 2238975.03  | 2785345.684 |
| 3406524.951 | 3003768.374 | 2480600.814 | 2472396.571 | 3851279.396 | 3056286.304 | 2166844.78  | 2950075.877 | 2098811.969 | 2302358.592 |
| 5165355.538 | 8264581.741 | 7325565.337 | 4723252.966 | 5962966.852 | 4139015.899 | 5104767.14  | 5793378.918 | 6114172.828 | 4218545.502 |
| 5918759.128 | 6536233.182 | 6394701.745 | 2680123.124 | 3694135.966 | 7088992.657 | 4561235.108 | 4712132.225 | 5152493.986 | 3804885.482 |
| 3708929.554 | 3189918.153 | 4955738.159 | 3226366.206 | 5462744.943 | 2596514.38  | 2846363.286 | 3545163.127 | 2916403.878 | 3137180.094 |
| 5806170.376 | 6844815.725 | 5647341.364 | 2179297.561 | 2619420.152 | 2791347.204 | 4337820.338 | 4539710.543 | 4785405.604 | 3892751.383 |
| 757295.4529 | 498588.6091 | 604354.9184 | 5807587.771 | 3013161.147 | 2260523.322 | 2671927.824 | 12528103.9  | 3400595.712 | 6141332.471 |
| 712009.5469 | 2562530.48  | 860362.9561 | 3013206.746 | 6830203.178 | 494374.9111 | 1693081.389 | 916952.4668 | 697810.103  | 726767.0377 |
| 2125044.194 | 2839020.595 | 2367730.797 | 1558494.072 | 4136343.869 | 3104648.342 | 9553201.31  | 1561585.589 | 8320081.996 | 1443520.305 |
| 3348835.227 | 7466377.155 | 4043599.51  | 2226673.55  | 2518938.73  | 4430640.294 | 3494881.581 | 1748957.096 | 3069321.397 | 1558644.095 |
| 3805984.378 | 2812552.561 | 2329926.889 | 3547440.574 | 6621748.844 | 2876119.269 | 2071835.887 | 2686101.305 | 1975425.464 | 2163316.65  |
| 5867898.122 | 5290815.076 | 7481983.424 | 4577399.309 | 6376906.821 | 5209033.946 | 4938835.484 | 7447361.231 | 4940126.447 | 4567669.052 |
| 2894162.306 | 5235640.056 | 4557066.865 | 3421373.475 | 5777323.505 | 1493981.305 | 4998644.299 | 3651563.502 | 3339390.602 | 4046506.488 |
| 6072584.159 | 7195114.728 | 6671007.963 | 3465216.697 | 4388226.017 | 8330526.96  | 4996069.561 | 5601508.663 | 4922390.789 | 3107723.117 |
| 3983100.595 | 4283096.839 | 4252041.06  | 3533747.024 | 3909205.762 | 5732873.381 | 6011498.89  | 4124821.162 | 6634346.164 | 6031454.074 |
| 1128084.893 | 1920306.016 | 1028004.064 | 6813946.234 | 2077858.57  | 987611.584  | 1636638.861 | 2302091.022 | 990030.5963 | 1769110.462 |
| 1893070.031 | 3191955.537 | 4018540.126 | 1545232.188 | 2501704.966 | 3553871.857 | 1215645.174 | 2088437.707 | 1676002.573 | 2828848.592 |
| 6521101.818 | 6877142.904 | 7529879.506 | 4685572.888 | 2576390.738 | 5729319.293 | 3445893.961 | 7027293.472 | 3231503.677 | 6366014.699 |
| 2464361.111 | 673147.6163 | 597881.5744 | 3568993.124 | 2828478.272 | 2846209.714 | 3691485.396 | 1150288.555 | 2474009.578 | 5375452.479 |
| 6951973.234 | 2444100.375 | 3660017.87  | 5927622.673 | 4925121.449 | 5267711.44  | 4306441.871 | 3045922.801 | 5769706.904 | 5636751.938 |
| 7893958.63  | 7526608.565 | 3960333.806 | 2793463.837 | 2273797.793 | 3857162.337 | 2642154.729 | 5205414.074 | 4110911.249 | 3131590.878 |
| 1482755.134 | 2535768.028 | 2324214.746 | 1414202.276 | 3005473.938 | 6713432.079 | 2827627.572 | 2579839.465 | 5569847.807 | 5567866.57  |
| 1894611.092 | 2019716.884 | 2309500.845 | 2279152.303 | 1602691.362 | 3109168.545 | 2976645.185 | 3420599.807 | 2851549.441 | 2206021.804 |
| 4380129.144 | 3706670.517 | 5021753.565 | 3767409.792 | 3764660.875 | 3240143.498 | 2824955.229 | 4723468.772 | 3830794.622 | 3313327.229 |
| 1343740.515 | 1680710.119 | 1623614.396 | 3088657.388 | 5411001.953 | 1659179.679 | 1227168.93  | 1814251.568 | 989817.9422 | 2357678.994 |
| 4464172.696 | 522491.2814 | 3046999.025 | 2698388.241 | 3173642.803 | 6809673.982 | 2116866.744 | 470414.2786 | 475853.0192 | 3787013.426 |
| 635218.7517 | 652851.4147 | 569743.4714 | 684712.2448 | 3522704.431 | 3564655.913 | 4602101.773 | 634628.0901 | 1381058.404 | 390131.4279 |
| 3507277.713 | 4576898.873 | 4469553.138 | 3356067.907 | 1890464.695 | 1405190.075 | 3370575.06  | 3979629.224 | 3106864.353 | 3692891.968 |
| 1435139.527 | 3028948.38  | 1281312.863 | 1692583.227 | 1571453.001 | 1307401.367 | 1638051.742 | 9448134.027 | 1983152.127 | 1460383.796 |
| 4055165.625 | 5908295.268 | 4471292.895 | 2823753.099 | 3312656.659 | 4151469.353 | 4128230.773 | 4855072.326 | 5849885.307 | 3531279.711 |
| 4639576.266 | 4960448.359 | 3615830.65  | 1608748.123 | 3869268.562 | 3589766.448 | 2799908.579 | 2971315.39  | 2386807.848 | 2874873.442 |
| 1861769.208 | 1823426.278 | 1714645.652 | 1747595.191 | 1823891.899 | 2533766.314 | 1172995.486 | 1994202.192 | 2110368.242 | 7806260.002 |
| 2551794.534 | 1789671.238 | 2870974.324 | 2548740.811 | 4429122.001 | 4599574.994 | 4496990.503 | 4047799.784 | 2883944.039 | 7641263.225 |
| 825518.1848 | 2755337.165 | 2868685.83  | 1635833.653 | 4782766.695 | 1539739.761 | 1304828.649 | 1079462.098 | 2591915.818 | 1236830.261 |
| 5027630.975 | 5708457.04  | 4385570.289 | 3107130.51  | 2312862.629 | 3521400.183 | 4414686.171 | 4407386.412 | 4367500.609 | 4276591.471 |
| 1752431.157 | 1650976.837 | 1691637.866 | 1057662.813 | 1591321.047 | 1077384.792 | 979490.8945 | 1169254.73  | 1110215.239 | 2006718.088 |
| 3256166.444 | 2299467.537 | 2210430.508 | 1979341.303 | 1984554.22  | 2860032.161 | 2667264.138 | 1857179.407 | 2751320.119 | 2354071.201 |
| 2638771.198 | 1379148.301 | 2017586.459 | 3599988.762 | 2673409.196 | 1936945.399 | 2446654.681 | 1407073.536 | 2186087.733 | 2324716.939 |
| 2618439.247 | 8862570.168 | 2096072.49  | 1822891.603 | 722302.5795 | 759172.9386 | 342817.6945 | 1630641.241 | 532638.2404 | 1007397.517 |
| 337569.9272 | 327929.509  | 302191.9482 | 220760.0153 | 274655.5101 | 431339.3897 | 314216.6409 | 3793005.586 | 276446.8438 | 7168858.34  |

|             |             |             |             |             |             |             |             |             |             |
|-------------|-------------|-------------|-------------|-------------|-------------|-------------|-------------|-------------|-------------|
| 2531710.661 | 2204170.068 | 1762041.239 | 1060961.412 | 1546958.815 | 1156606.869 | 1268324.101 | 1137475.946 | 1227092.214 | 1250427.857 |
| 5327377.648 | 5492571.29  | 4710389.711 | 4117598.125 | 4362782.316 | 2186272.368 | 3747760.694 | 7820507.898 | 3580946.663 | 2617234.203 |
| 3487132.779 | 3768975.24  | 3196673.68  | 1692812.197 | 2119521.757 | 1830573.682 | 3046931.406 | 2525461.109 | 2551482.488 | 2489936.501 |
| 3514296.575 | 1370980.176 | 1933739.563 | 4377177.759 | 4352808.055 | 3885727.714 | 3218362.562 | 1922045.705 | 5077600.221 | 4867420.66  |
| 351028.722  | 1773433.106 | 1217688.933 | 900805.7791 | 1720119.105 | 2114876.148 | 6144704.201 | 7062553.019 | 5306469.471 | 3189235.556 |
| 4898307.642 | 5903072.821 | 4409266.817 | 3374152.636 | 2632456.257 | 3679020.943 | 4026700.999 | 3975492.073 | 3942795.183 | 4198628.232 |
| 3538363.511 | 1164637.022 | 4240983.887 | 1832132.622 | 1299875.643 | 3736151.618 | 2357067.248 | 2299324.749 | 3163889.46  | 2240236.496 |
| 4283876.916 | 3169603.277 | 2987231.91  | 2971325.408 | 2684305.283 | 4256880.345 | 2909341.58  | 3920607.157 | 4214679.033 | 3694819.942 |
| 591668.751  | 564703.5282 | 804636.0125 | 4050935.126 | 4027342.876 | 3104633.557 | 3089772.609 | 2810984.161 | 3145310.274 | 3235380.361 |
| 1159306.683 | 1501790.173 | 1297233.814 | 2712465.463 | 4024198.825 | 3663459.959 | 2406697.326 | 2336895.211 | 3375222.045 | 1988665.865 |
| 2496217.878 | 5235748.371 | 3652124.148 | 1983643.234 | 1443389.64  | 2387894.459 | 1700970.618 | 3838044.486 | 1599960.676 | 2879822.997 |
| 4307689.172 | 4312869.554 | 3309357.652 | 1809933.428 | 2246025.592 | 2635903.962 | 3566385.953 | 272041.1632 | 4148284.931 | 3165486.442 |
| 2630568.521 | 6075158.053 | 6245932.614 | 2631668.043 | 1741981.368 | 4477283.851 | 782873.6561 | 2122459.373 | 4554130.573 | 1493761.788 |
| 3370614.959 | 2760477.985 | 2401256.86  | 953288.7159 | 359506.93   | 2279352.039 | 1908222.114 | 2117676.617 | 2814241.59  | 857243.4737 |
| 3238432.445 | 2481898.851 | 3226220.422 | 3961256.497 | 3069155.108 | 2514376.387 | 2674269.209 | 2013283.861 | 3485713.346 | 2289164.755 |
| 4095494.877 | 2131892.949 | 2698472.877 | 2684342.832 | 2425003.469 | 2513016.549 | 2570091.217 | 2173210.479 | 3305743.331 | 3161939.293 |
| 684347.7269 | 1644290.336 | 718688.3814 | 1184304.707 | 3299382.998 | 391614.8952 | 1600500.342 | 331761.218  | 2121707.055 | 1250777.081 |
| 776844.485  | 1238597.144 | 1044795.886 | 2242253.646 | 895487.0545 | 1168756.068 | 439615.3629 | 2089861.208 | 3193097.331 | 800063.5669 |
| 446079.4223 | 446423.0299 | 385535.6097 | 301277.9064 | 3144298.513 | 469950.0424 | 331411.6414 | 318516.0269 | 1021462.88  | 1054475.58  |
| 1458100.194 | 2362781.326 | 1176080.623 | 2059819.925 | 2917388.528 | 588453.7889 | 645930.5957 | 1586821.74  | 1407260.542 | 513819.6286 |
| 354671.3049 | 410763.0625 | 285646.3242 | 436449.2    | 1058999.711 | 351681.428  | 4003361.008 | 252481.4496 | 272921.2999 | 549639.8646 |
| 2299594.009 | 2806661.246 | 2193906.967 | 2421135.485 | 1797595.93  | 1956398.568 | 2715057.674 | 1313519.343 | 1789717.21  | 2686192.829 |
| 1446386.212 | 2801492.138 | 2020240.117 | 1632358.633 | 1742556.39  | 2074355.867 | 3059739.585 | 3266577.87  | 3439140.745 | 3669880.336 |
| 3493360.556 | 2018701.406 | 2330400.9   | 623277.2361 | 1066657.09  | 1904204.237 | 1195315.76  | 1087262.441 | 1181586.075 | 1219679.851 |
| 1810669.102 | 2351657.077 | 2132441.158 | 2783332.589 | 1755762.712 | 1953087.95  | 1796334.725 | 2182269.434 | 1992612.299 | 2175764.599 |
| 3345728.071 | 2168982.805 | 2518860.713 | 2346339.696 | 900460.5835 | 1385509.646 | 1245644.52  | 774035.7818 | 1837410.727 | 1209379.28  |
| 521403.364  | 1197687.386 | 1181741.787 | 943651.786  | 911282.0359 | 1360718.529 | 887134.9511 | 630757.1433 | 731804.4374 | 1140144.43  |
| 118238.9095 | 618906.2232 | 672316.3871 | 282700.6935 | 707220.2738 | 368857.0123 | 3089281.683 | 448252.6137 | 623071.8953 | 389176.1773 |
| 2602446.539 | 2532808.216 | 1678388.077 | 847239.6865 | 1171374.287 | 750494.6771 | 1463690.409 | 1975792.317 | 1666822.75  | 923984.4156 |
| 2888281.323 | 616337.3709 | 683749.3644 | 226127.5154 | 173422.3056 | 177151.7491 | 244232.445  | 349666.8737 | 258176.4768 | 167146.4962 |
| 2727613.694 | 2756640.596 | 2816243.912 | 1303621.914 | 907064.7566 | 995203.6712 | 1164207.35  | 1681959.553 | 2027581.358 | 1304546.48  |
| 1202788.447 | 2195982.542 | 1616164.109 | 679876.3411 | 325946.2344 | 1139323.711 | 790146.0195 | 1543657.835 | 813043.1611 | 1221881.386 |
| 108908.5904 | 713223.3185 | 141154.9462 | 212151.0083 | 236312.0751 | 186251.3336 | 175825.473  | 169918.3494 | 140335.3292 | 296101.5782 |
| 733956.9471 | 1394695.608 | 1455808.998 | 934051.9466 | 739038.502  | 2482532.414 | 1008898.807 | 1306441.421 | 578660.3986 | 1801553.632 |
| 1150549.57  | 678552.2316 | 1029992.89  | 457962.4189 | 596694.0452 | 1473884.586 | 2685383.398 | 1639812.589 | 2683760.026 | 804750.2824 |
| 608152.1138 | 723710.0103 | 650055.2726 | 519732.8303 | 1544085.3   | 2456010.942 | 769576.0368 | 1891636.207 | 580053.2936 | 1296330.363 |
| 702232.8845 | 425528.0782 | 427516.5974 | 1806563.958 | 344390.2396 | 443365.0724 | 364955.5109 | 1376218.291 | 365585.2898 | 385508.7978 |
| 1048376.815 | 1377324.648 | 598974.2854 | 122735.9629 | 156326.7869 | 144243.7589 | 432522.7947 | 120462.5944 | 111837.7901 | 115718.2096 |
| 914193.1553 | 1155961.207 | 981614.9543 | 1277062.281 | 824029.6647 | 1532207.176 | 1341618.203 | 853247.9223 | 1182150.439 | 1964824.651 |
| 511186.4435 | 516428.4866 | 755845.7186 | 363629.917  | 201481.8824 | 338093.148  | 454632.618  | 293467.9991 | 435154.9527 | 419520.5366 |
| 436894.9637 | 689875.459  | 503330.8383 | 438918.6307 | 277138.0964 | 491466.7971 | 824159.5416 | 581665.4702 | 370539.1378 | 1014798.449 |
| 195130.022  | 209635.3727 | 162918.7525 | 348698.208  | 192919.2147 | 156645.0271 | 93144.21807 | 135685.6636 | 148025.5437 | 137650.4829 |
| 720283755   | 3721063559  | 230657634.1 | 4651948211  | 788936143   | 1131054507  | 8782835481  | 11366679264 | 2901232197  | 1462754664  |
| 1408739956  | 962979402.3 | 1233118604  | 860712993.4 | 283836220.7 | 475882178.4 | 586613255   | 928985992.2 | 913365315.8 | 331755571.3 |
| 51037652.26 | 70604681.81 | 84835412.83 | 296841108.2 | 1032002580  | 50739513.7  | 377325183   | 30712726.4  | 45567779.51 | 214680215.5 |
| 100531335.4 | 193862332.1 | 107688628.2 | 654562221   | 299677493.3 | 43833595.32 | 145845783.9 | 148835389   | 107275155.7 | 319170688.1 |
| 143341636.9 | 152148605   | 141063973.7 | 147537897.6 | 510178832   | 244729666.5 | 136116273.9 | 194648141.2 | 126637895.9 | 134840635   |
| 380375497.4 | 290757188.2 | 266808780.3 | 253801152.4 | 454402145.7 | 305597604.5 | 531975390.1 | 210357375.8 | 326788994.8 | 196860997.3 |
| 131148449.8 | 202980048.6 | 193621282.9 | 236097680.2 | 373449554.4 | 113066479.3 | 207726777.2 | 173604633.4 | 120956072.5 | 198952061.8 |
| 338079999.6 | 339212462.7 | 297928143.5 | 267216832.2 | 230123459.1 | 223729355.5 | 308071332.6 | 249418908.6 | 281384741.7 | 304903721   |
| 222760513.1 | 178131784   | 158541693.5 | 52925943.57 | 97992655.21 | 257907272.5 | 338395066.3 | 589282102.5 | 234620195.1 | 50326540.57 |
| 92416282.45 | 118850040.4 | 107492566.2 | 130643250.6 | 307099024.9 | 334528573.7 | 401117990.4 | 260755076.8 | 287406422.9 | 244533020.8 |
| 179078390.4 | 150416443.3 | 146039013.4 | 90740847.74 | 145044422.9 | 130469314.4 | 141666357.9 | 123438907.7 | 135287018.7 | 95358194.49 |
| 184412551.1 | 171315589.1 | 161055435.4 | 93327317.12 | 146316763.3 | 135129109.6 | 142620374.9 | 115313727.7 | 129248496.8 | 95336676.36 |



|             |             |             |             |             |             |             |             |             |             |
|-------------|-------------|-------------|-------------|-------------|-------------|-------------|-------------|-------------|-------------|
| 193430302.4 | 213076153.2 | 171737336.2 | 145022048.1 | 193369951.2 | 129781585.2 | 187377426.7 | 249042205.9 | 172233634   | 185426463.1 |
| 152474402.7 | 180094458.1 | 145091088.5 | 127477002.6 | 45972914.42 | 87898212.27 | 99555483.47 | 123057911.4 | 74521665.4  | 78356674.55 |
| 291435673.2 | 206367545.8 | 160490946.6 | 201611595.7 | 180743776.2 | 168365783   | 155384381.2 | 424010841.2 | 333010224.5 | 89198455.74 |
| 188031305.4 | 228901656.2 | 213943470.9 | 68783969.7  | 77767036.06 | 99614885.3  | 103433751   | 101013428.4 | 84559153.59 | 110969656.7 |
| 189429873.5 | 184023851   | 174709200.6 | 99641050.33 | 154206754   | 133156052.1 | 141668337.6 | 127973593.7 | 114363611.6 | 94359517.53 |
| 60779019.08 | 61824109.7  | 59540131.67 | 71967258.76 | 216235626.7 | 46022764.99 | 117240283.5 | 43377818.78 | 61931389.73 | 55243880.5  |
| 101261011.5 | 115702069.2 | 110262450.9 | 63252563.77 | 24872579.41 | 250603129.1 | 29280047.76 | 356626513.1 | 56832078.75 | 98009930.21 |
| 136525205.6 | 139464258.9 | 132935327.1 | 86555831.2  | 112461251.5 | 94346189.86 | 119152857.5 | 102262272.6 | 118030019   | 111805119.2 |
| 125773604.8 | 131823512.1 | 109740028.6 | 72419833.57 | 90975502.25 | 76226407.26 | 82814340.69 | 90853431    | 64582630.2  | 65299721.1  |
| 55420656.6  | 39244318.11 | 37811619.03 | 62035594.79 | 99813319.84 | 42849126.18 | 224065548.6 | 48459365.52 | 162223840.5 | 22860317.85 |
| 81754694.98 | 77733691.86 | 72566002.93 | 73605911.27 | 94694870.95 | 41391646.54 | 35512500.76 | 54472827.84 | 46848967.32 | 33580024.66 |
| 157413124   | 165070613.5 | 100403325.4 | 72562348.02 | 115167016.3 | 94874110.65 | 101612856.4 | 122631327.9 | 124801205.1 | 81452662.93 |
| 46690372.22 | 142263108.8 | 99693899.68 | 144177978.6 | 58921837.31 | 18389412.95 | 33814622.25 | 56155864.83 | 27004874.14 | 71406690.8  |
| 29085407.3  | 34801841.68 | 16224322.81 | 23427186.37 | 14191413.01 | 24978077.32 | 182483473.7 | 55300408.72 | 110206381.5 | 17971361.55 |
| 143393205   | 134884433.5 | 140159989.7 | 51464999.29 | 76865782.05 | 122301537.6 | 103708778.4 | 132913552.4 | 111372349.9 | 90272927.17 |
| 97947966.84 | 45566624.23 | 72310022.59 | 31812429.71 | 65768531.9  | 39882636.99 | 64526958.33 | 57546613.24 | 103077302.9 | 19430470.09 |
| 51949644.06 | 53362518.28 | 30990216.88 | 104244814.2 | 85914478.31 | 32419917.83 | 83066758.04 | 53006777.49 | 74849978.51 | 26464317.01 |
| 31426809.55 | 47301356.07 | 30470137.27 | 121027141.5 | 48603741.87 | 24818744.16 | 41726311.59 | 50770130.96 | 50367063.79 | 30574497.66 |
| 54857020.02 | 45074895.37 | 57485905.21 | 32812591.51 | 108200661.2 | 82618077.64 | 62500730.28 | 29953101.03 | 41834520.48 | 48117619.42 |
| 61982454.99 | 55518240.56 | 41786216.49 | 42066331.93 | 60091356.49 | 60228549.32 | 53085779.93 | 98283865.3  | 41867452.13 | 58908286.57 |
| 53217252    | 50291748.68 | 62777226.81 | 52405885.77 | 89693530.45 | 31046097.26 | 71752098.4  | 41637568.77 | 31782736.67 | 55491804.36 |
| 53381054.1  | 57290054.08 | 52362607.67 | 85868442.56 | 75044784.49 | 67228813.94 | 68367581.95 | 77530444.21 | 52527622.97 | 82038767.94 |
| 102290286.3 | 74760518.61 | 42542184.2  | 17862645.94 | 14932016.25 | 50903362.68 | 44488851.48 | 36322069.07 | 32338055.78 | 77789700.24 |
| 3177438.194 | 9783925.066 | 20374967.2  | 19030889.52 | 76553572.84 | 2761377.543 | 41326244.52 | 2909788.951 | 9593277.819 | 14434266.65 |
| 26783091.73 | 22605601.42 | 26994683.88 | 17359017.95 | 23997068.04 | 96568289.87 | 16220231.39 | 37991756.05 | 32057396.43 | 13810064.25 |
| 22538916.9  | 37778805.93 | 21496205.94 | 22561449.55 | 69625940.95 | 23831621.74 | 58126272.4  | 62804107.71 | 42617623.94 | 21213882.5  |
| 79863132.5  | 128492359.1 | 44188616.44 | 30904832.48 | 38364767.83 | 49465925.63 | 47259586.41 | 92952934.78 | 49050378.09 | 63536156.08 |
| 52453106.08 | 55648542.03 | 37160847.84 | 62098715.71 | 66771173.31 | 26251610.92 | 58614386.69 | 47496560.27 | 51448411.4  | 39265144.28 |
| 34910117.87 | 17787123.04 | 14507560.43 | 50132975.25 | 35525605.98 | 62912180.24 | 42135008.76 | 35586778.05 | 40736550.47 | 68305283.3  |
| 71805423.09 | 57625241.45 | 32544878.6  | 15114206.49 | 11613198.88 | 82068905.23 | 42226485.58 | 85553840.24 | 73138084.02 | 21350897.46 |
| 48044725.75 | 50536330.34 | 49340789.33 | 31708851.85 | 61451366.66 | 27999586.36 | 73455679.46 | 26771010.61 | 53898618.7  | 35374345.94 |
| 49319015.96 | 49647821.72 | 55952674.59 | 22617334.3  | 27019985.36 | 35268734.86 | 34599457.09 | 39381273.2  | 34564680.97 | 35957522.7  |
| 25834672    | 30632785.04 | 31348838.78 | 33752910.18 | 30386501.47 | 50554040    | 80687901.14 | 35304282.23 | 61545773.42 | 40212202.15 |
| 12173216.36 | 11586705.04 | 8171358.051 | 34500692.25 | 46575666.97 | 42665568.41 | 54949129.22 | 41454787.23 | 54849394.99 | 32314419.33 |
| 38043079.61 | 43793936.89 | 34163208.8  | 31352122.72 | 55241563.6  | 24954182.76 | 36726072.07 | 35083940.21 | 32813220.7  | 23548129.87 |
| 37766379.22 | 51043690.05 | 51968886.87 | 17440784.19 | 12935035.76 | 37960609.08 | 14777370.24 | 50929098.97 | 17504297.33 | 28297255.37 |
| 18700629.33 | 22003467.61 | 18371745.91 | 38157724.13 | 46809599.18 | 14151522.53 | 55288861.81 | 63221228.1  | 33587381.06 | 15864725.48 |
| 22764190.23 | 50791624.26 | 45684932.63 | 24156770.97 | 50490053.91 | 27526142    | 20726074.52 | 13301828.3  | 10848504.68 | 20422532.7  |
| 31880310.85 | 27379287.27 | 18718529.76 | 25299992.84 | 49348426.23 | 21107799.13 | 38264316.66 | 22493798.43 | 32665392.45 | 19326331.54 |
| 60890141.1  | 69448362.92 | 52066506.22 | 46663758.43 | 41422984.32 | 47048990.32 | 67340006.03 | 51740223.64 | 50443087.17 | 68228939.34 |
| 32294786.66 | 69726794.17 | 17374807.87 | 25982871.55 | 12546687.27 | 17857957.56 | 28613970.62 | 33555232.38 | 30033103.88 | 10370390.05 |
| 6534032.616 | 54994093.04 | 42386577.92 | 6103307.069 | 5948781.776 | 6267191.429 | 5581090.271 | 2876269.414 | 3641016.569 | 7270368.988 |
| 30730685.11 | 36655142.06 | 27582757.23 | 13669046.52 | 7242427.166 | 8239715.631 | 6450981.972 | 9782576.96  | 6786561.915 | 5236065.473 |
| 24654989.78 | 36530496.82 | 40373056.88 | 44957774.68 | 36701397.21 | 41923597.01 | 20996605.06 | 20542177.04 | 50880480.76 | 45765072.55 |
| 33416831.34 | 19386870.07 | 20063068.49 | 9954889.451 | 11586631.52 | 18050297.33 | 33732446.59 | 15014563.18 | 11718784.95 | 5106293.298 |
| 32210921.33 | 20373071.11 | 23307313.67 | 17906138.99 | 26448002.15 | 33739774.33 | 40939354.43 | 22418936.24 | 17254618.11 | 16903844.94 |
| 26164968.29 | 27752425.21 | 32691868.27 | 15495343.22 | 17805385.85 | 14505247.91 | 18537760.32 | 20711488.78 | 17257494.88 | 10801854.24 |
| 29838362.08 | 30355058.11 | 32447256.68 | 20121048.42 | 19513735.4  | 17991569.31 | 18207191.12 | 18113325.16 | 18400681.55 | 23323231.85 |
| 26138794.44 | 14680605.77 | 25819061.68 | 18272425.11 | 16721680.66 | 14984037.89 | 24373119.83 | 17319532.34 | 21683828.95 | 24413563.24 |
| 6518346.975 | 6501859.373 | 5729926.571 | 18263055.38 | 34483886.36 | 5284801.705 | 20987997.53 | 5829552.63  | 8073326.908 | 7604462.489 |
| 21377152.96 | 65469369.6  | 29099254.18 | 10537220.01 | 10332151.03 | 22742069.05 | 10552780.23 | 11257516.63 | 17773640.41 | 12930277.31 |
| 10071021.22 | 35633744.89 | 17522814.41 | 34726830.36 | 31263101.34 | 12475356.79 | 20073268.6  | 27989088.43 | 14799821.32 | 16305379.12 |
| 19655657.46 | 15775529.73 | 19437369.17 | 7507732.073 | 19245756.2  | 12510679.9  | 14481807.21 | 9511528.438 | 10899174.17 | 10822105.77 |
| 24192008.94 | 27015846.98 | 15678755.64 | 13491412.9  | 20647107    | 13702532.44 | 29986063.3  | 20245296.8  | 30102703.88 | 13089948.87 |

|             |             |             |             |             |             |             |             |             |             |
|-------------|-------------|-------------|-------------|-------------|-------------|-------------|-------------|-------------|-------------|
| 20576858.09 | 15964525.33 | 17727705.3  | 11262395.28 | 16583954.03 | 16487874.92 | 22895838.01 | 15902367.95 | 33519690.12 | 8765972.358 |
| 31388369.1  | 26840534.79 | 27531821.53 | 15798902.94 | 20654530.76 | 26282404.58 | 23262533.26 | 27286425.45 | 24874526.82 | 23153697.08 |
| 11529527.43 | 8342526.684 | 20431827.6  | 5250460.44  | 24067930.62 | 7250620.203 | 10715551.63 | 9245679.635 | 11217320.71 | 7414967.729 |
| 12870181.99 | 2305063.819 | 2904192.033 | 13778788.47 | 19730433.58 | 17942139.21 | 26400853.48 | 15861381.42 | 22975711.58 | 12370989.22 |
| 8470940.015 | 18064997.71 | 7800584.378 | 11313936.71 | 7240508.854 | 7236560.443 | 6605198.017 | 8234851.945 | 6574167.193 | 9408879.851 |
| 17057281.44 | 12145148.17 | 14185403.49 | 10633947.6  | 18967001.32 | 17718714.22 | 18326134.36 | 17137133.61 | 17699004.57 | 14419337.44 |
| 16160923.51 | 18849960.01 | 13520201.55 | 10131818.67 | 9693641.702 | 12855716.14 | 12217102.1  | 11138278.28 | 13172923.69 | 13532284.42 |
| 10680449.47 | 10637893.4  | 8000350.802 | 5828416.221 | 9023771.025 | 7458164.758 | 11550555.46 | 10037364.52 | 9884772.418 | 7861231.98  |
| 4401720.6   | 4439189.361 | 2827436.36  | 10845708.16 | 2528308.425 | 16929819.53 | 3918214.186 | 15761920.61 | 23878774.91 | 3017307.865 |
| 8037643.67  | 8954114.775 | 7846376.46  | 7035123.459 | 9336314.549 | 7392266.568 | 7824325.954 | 7458034.485 | 7600169.79  | 7671277.487 |
| 13071832.98 | 10991458.46 | 8117887.481 | 5397131.234 | 15480673.89 | 7383418.595 | 14443776.19 | 8094151.479 | 8595096.665 | 7634612.506 |
| 8047936.797 | 24600866.84 | 15952173.12 | 2438058.851 | 2732357.08  | 4203384.017 | 900552.6927 | 4082783.582 | 8071267.706 | 1642658.041 |
| 12562186.42 | 9330045.454 | 8238822.802 | 5391891.086 | 10809908.9  | 6755430.146 | 8158710.169 | 5416374.29  | 9706527.056 | 6697076.466 |
| 733110.3641 | 837283.284  | 868525.0561 | 8629506.074 | 7429902.336 | 4601655.692 | 6346212.237 | 2079092.673 | 9474785.831 | 4624382.219 |
| 5098814.549 | 2431171.895 | 8011882.339 | 3957796.91  | 7150880.372 | 4529394.853 | 6004435.273 | 1908472.632 | 4267033.9   | 5802085.789 |
| 6557987.339 | 6961114.612 | 6185706.762 | 8726359.035 | 4209024.935 | 4896911.895 | 4670734.949 | 4357693.342 | 4496586.032 | 5695712.088 |
| 5181650.061 | 7216342.625 | 9133098.211 | 1326044.911 | 558955.0229 | 1304114.581 | 1118952.952 | 986286.9259 | 690630.8054 | 2779223.147 |
| 6733399.744 | 5319953.479 | 5964983.256 | 1909187.617 | 3129488.707 | 3686983.112 | 3247243.167 | 1556393.81  | 3898696.758 | 3280913.161 |
| 7449129.61  | 6578982.588 | 4809068.005 | 7191677.319 | 4656159.727 | 7069280.55  | 4634504.662 | 3495049.156 | 5896169.815 | 3839218.05  |
| 4921102.569 | 3423653.678 | 3668811.17  | 4535433.146 | 764551.6152 | 3456924.56  | 3745154.604 | 6931380.104 | 3946331.054 | 5090799.296 |
| 3370893.085 | 4033314.831 | 2649425.668 | 1358299.272 | 2579170.466 | 2247504.766 | 2285317.847 | 1559229.977 | 2194754.644 | 2184071.01  |
| 711905.0257 | 848723.7474 | 641346.7566 | 630930.0854 | 994629.9039 | 945243.5255 | 1296128.394 | 1194675.761 | 313454.0088 | 860109.4922 |

| pos_L_HWM2  | pos_L_HWM3  | pos_L_HWM4  | pos_L_HWM5  | pos_L_HWM6  | pos_QC1     | pos_QC2     | pos_QC3     |
|-------------|-------------|-------------|-------------|-------------|-------------|-------------|-------------|
| 3316924501  | 3995666834  | 4821386074  | 3776572802  | 6695426748  | 5280161998  | 4518805300  | 4725785893  |
| 3284378717  | 973784075.6 | 2450265630  | 1162140637  | 4529906931  | 4201531405  | 2583890805  | 2408570947  |
| 1784574642  | 1458184856  | 1752152457  | 2739174408  | 841851806.6 | 3069478539  | 2222366942  | 2113888730  |
| 459431027.8 | 535673839.3 | 1151476382  | 459693508.5 | 768125896.2 | 943671933.6 | 893383629.5 | 903062513.3 |
| 2088704290  | 1722941564  | 1028539334  | 2203470995  | 2394987039  | 1716032943  | 2271469929  | 2499005967  |
| 1846063021  | 1973108193  | 852509039.3 | 3840922206  | 1005450270  | 1326475885  | 1903188326  | 1832708629  |
| 1629312751  | 977419410.2 | 930447449   | 2632337349  | 1254829908  | 1496195660  | 1926896822  | 1868847557  |
| 246085390.3 | 73975140.7  | 719473322.7 | 77605921.38 | 54692375.16 | 344923648.9 | 267787942   | 276088340.8 |
| 749068864.4 | 753167642.4 | 1126100822  | 445677564.9 | 1471869915  | 839117444.6 | 953926040.7 | 968741286.9 |
| 1095425175  | 857550101.7 | 599456889   | 1250537720  | 372727649.9 | 1401799454  | 840832364.1 | 923798357   |
| 757255651.3 | 2278164146  | 204602537.4 | 532738852.3 | 371228826.7 | 512871935.2 | 547291060   | 542156682.8 |
| 768873580   | 471909016.9 | 271965235.9 | 1460603008  | 536837771.1 | 626216287.2 | 830148859   | 845761166.4 |
| 453754992.4 | 890304352.6 | 740765739   | 790320725.8 | 336167418.7 | 653766370   | 760127314.7 | 777682979.1 |
| 495814755   | 734084740.6 | 559346897.3 | 483736795   | 1056671839  | 482386763.4 | 511216319.2 | 514751667.2 |
| 256725632.4 | 299637565.2 | 420511922.5 | 245166073.6 | 409734712.1 | 312849676.7 | 435879026   | 390722298.8 |
| 435202715.3 | 717256319.1 | 331139697.7 | 562796988.4 | 351238406.7 | 427330617.6 | 587039757.5 | 585941031.6 |
| 267716486.6 | 158653957.4 | 126662659   | 251849972.8 | 451223736.7 | 330545923.8 | 319472490.2 | 287479877.5 |
| 452949957.7 | 1408971536  | 180351527.8 | 461623407.6 | 566695884.9 | 354387758.9 | 516838885.1 | 496958646.7 |
| 388830709.1 | 236440621.9 | 396913456   | 791811146.9 | 32538663.23 | 476379632.2 | 465155025.9 | 346066678.5 |
| 463208555.2 | 87962949.78 | 55752942.83 | 94182288.16 | 277641236.9 | 299420658.4 | 191152799.6 | 151565646.4 |
| 623097927.3 | 486172325.5 | 462531427.5 | 482783296.5 | 602507752.3 | 340989720.7 | 403626851.9 | 421953985.4 |
| 445134405.3 | 464865557.7 | 341739660   | 364574140.7 | 394943008.8 | 447222667.8 | 326166056.9 | 266104084.3 |
| 93805162.8  | 98347934.96 | 86226451.08 | 63412535.77 | 44727642.79 | 147202587   | 110017076.1 | 106322957.3 |
| 24865763.17 | 31623609.71 | 34056440.38 | 112336043.7 | 95987512.73 | 82381587.53 | 116686045.9 | 113562268.1 |
| 279505698.9 | 404821155.5 | 141797118.9 | 253687126.7 | 113938365.9 | 357046900.8 | 197967747.1 | 317970880.5 |
| 174826584.5 | 308360778.4 | 442870632   | 162080497.5 | 343087144.5 | 205143021   | 214651181.9 | 303622591.5 |
| 389203114.2 | 241775487   | 140192398.4 | 183879976.2 | 203099545.8 | 246381578.2 | 252119988   | 290999859.2 |
| 70248125.97 | 104953800.8 | 151465390   | 33817014.79 | 172680806.5 | 94458205.58 | 96932647.37 | 95508423.4  |
| 272054714.2 | 302766423.9 | 207346850.3 | 335034503.5 | 328777417.5 | 271379201.7 | 315845320.6 | 335716355.1 |
| 217365521   | 151328770.4 | 201200019.7 | 153270957.8 | 285933609.5 | 199367966.5 | 181978839.1 | 189151378.7 |
| 84729364.64 | 167086322.9 | 106218466.6 | 50558816.32 | 76482716.69 | 91141898.82 | 107984212.1 | 119082198.4 |
| 121441114.1 | 160620994.9 | 86495152.62 | 56449972.44 | 101336192.6 | 124756156   | 122735633.6 | 137834838.2 |
| 6927253.789 | 7993736.432 | 4985923.885 | 14856244.4  | 5690726.467 | 16180695.11 | 19786472.01 | 23289432.47 |
| 413500018.6 | 357096747.9 | 221388977.4 | 309857943   | 199857213.3 | 193002990.6 | 237263917.7 | 247157424.6 |
| 168504693.1 | 102856901.6 | 172484389.4 | 124275810.6 | 296408484.5 | 115061812.2 | 151563333.1 | 173844956.6 |
| 97362944.01 | 85680345.07 | 75118234.88 | 98846408.84 | 94578053.12 | 120480498.4 | 134835219.3 | 136190456.8 |
| 78379436.47 | 39006994.12 | 53602201.98 | 100544526.7 | 45870292.66 | 67768290.94 | 78132155.41 | 79773365.13 |
| 66766244.36 | 72721478.73 | 51533604.1  | 35465453.17 | 108720320.1 | 70653635.23 | 68363335.18 | 71983903.26 |
| 228637011.1 | 55654706.27 | 144417623.9 | 49231739.83 | 59214628.01 | 86015565.31 | 68113995.94 | 63138726.45 |
| 68878876.21 | 34985749.02 | 47345522.51 | 78864955.4  | 26413294.86 | 113397924.8 | 82265433.7  | 77529811.91 |
| 86964774.64 | 18023789.43 | 11080813.97 | 35136059.95 | 20747625.13 | 58613760.13 | 34196298.15 | 31244465.32 |
| 3106816.86  | 1974008.549 | 1769923.565 | 2239047.559 | 1650747.956 | 34088127.99 | 22286891.93 | 19709327.03 |
| 19390639.39 | 8511505.535 | 10898960.9  | 9951286.432 | 13133408.94 | 36979446.95 | 22532574.66 | 19233611.36 |
| 34495885.24 | 38032407.75 | 28179505.86 | 24060875.18 | 21105949.37 | 38937024.96 | 33934638.43 | 34760765.25 |
| 55227669.02 | 137590174.2 | 50781091.27 | 65723964.06 | 58680918.52 | 78221988.93 | 73588347.7  | 79424486.5  |
| 43164502.68 | 59664489.12 | 25291798.44 | 89858343.94 | 33733912.48 | 43172986.86 | 57622994.36 | 62063753.75 |
| 29643889.84 | 168831165.4 | 9884517.769 | 39600495.94 | 2544891.708 | 23262484.45 | 25920944.53 | 26549921.57 |
| 11730771.01 | 102820082.6 | 3065552.188 | 11692740.56 | 5004099.746 | 17455886.44 | 16429497.31 | 17427252.11 |
| 35019068.39 | 74291536.24 | 22709103.23 | 36545746.17 | 32034866.19 | 44716496.71 | 42255570.79 | 44558081.45 |
| 68282416.7  | 43559291.91 | 41043338.58 | 86017379.79 | 52535871.37 | 67790353.97 | 68505008.16 | 76090566.24 |
| 70617832.52 | 48021916.18 | 92228144.77 | 44009976.39 | 39713721.71 | 30738227.37 | 47933712.88 | 49229285.51 |
| 49626115.91 | 41215169.43 | 20028311.79 | 37161745.09 | 8243623.822 | 22554162.39 | 29743213.13 | 26609435.6  |
| 104422039.3 | 17446751.21 | 60878017.26 | 27768555.73 | 51026108.57 | 52128497.75 | 44031648.65 | 36464737.66 |

|             |             |             |             |             |             |             |             |
|-------------|-------------|-------------|-------------|-------------|-------------|-------------|-------------|
| 71437203.14 | 73919107.65 | 53137620.02 | 56074011.92 | 74406129.67 | 43880144.13 | 63002826.75 | 66350361.73 |
| 107468506   | 45157538.56 | 80260139.46 | 92659364.46 | 41366716.91 | 54734042.51 | 57195542.64 | 47054116.69 |
| 11318648.97 | 9802375.377 | 4088543.598 | 2922353.951 | 6413099.054 | 9107851.566 | 7257341.85  | 6496475.604 |
| 106078225.3 | 45096887.34 | 42958424.9  | 91542794.88 | 52745512.34 | 28350471.7  | 31510458.34 | 35587621.23 |
| 40239739.15 | 52085024.97 | 23966419.53 | 13428126.42 | 56456935.71 | 26274836.33 | 26742065.44 | 44894290.73 |
| 38281992.22 | 46025129.98 | 18365040.57 | 42177173.84 | 22447822.67 | 22876393.65 | 31268445.33 | 32678528.67 |
| 7290470.303 | 12090315.05 | 1488691.414 | 5168935.021 | 558167.4073 | 3250664.819 | 2879974.223 | 3021603.174 |
| 2937715.975 | 1244921.479 | 4187665.308 | 2566530.599 | 2193388.812 | 2308992.824 | 1496640.217 | 1253793.479 |
| 2273947578  | 4077353988  | 4944813527  | 1529782085  | 7281146666  | 3367511676  | 3621314286  | 3689762136  |
| 3223053659  | 722148638.3 | 2703182998  | 706477457.8 | 3110954257  | 2116049342  | 2523663893  | 2715786007  |
| 1665995165  | 1392076270  | 102867581.7 | 2262525663  | 434287100.9 | 1325339753  | 1394550722  | 1455916629  |
| 585638575.8 | 476918691.5 | 486167679.8 | 1948390999  | 403784343.9 | 1415638952  | 957975927.4 | 1254406225  |
| 804045972   | 783666205.3 | 1174092639  | 503962850   | 1483768811  | 883422866   | 1001138707  | 1012161420  |
| 2546927020  | 2162992936  | 1024390580  | 1792236490  | 1091663536  | 1497192246  | 1900430784  | 2170347869  |
| 767650875.6 | 391910922.1 | 417427412.9 | 1044114266  | 261998304.7 | 677337051.8 | 831957445.1 | 855978936.8 |
| 791562728.2 | 450266618.7 | 556188218   | 997145133.9 | 599409368.1 | 923860331.2 | 841436677.8 | 924889551.7 |
| 446006500   | 884152517.6 | 734626635.3 | 783607004.2 | 331674070.4 | 647312082.9 | 751790318.9 | 769292602   |
| 340027001   | 370314808.8 | 101309574.5 | 985153142.2 | 294781783.9 | 831632324.8 | 539031944   | 537052215.7 |
| 390524609   | 651579131.7 | 305762449.3 | 173157239.2 | 603301139.6 | 525703893.9 | 400644192.2 | 380862899.5 |
| 175083051.3 | 140421571.1 | 192133492.3 | 610789093.8 | 212626316.1 | 501030133.1 | 361608239.9 | 322490141.9 |
| 179408364.2 | 1145118226  | 159689658.4 | 306228843   | 53115199.67 | 210882420.9 | 251131725   | 244609444.9 |
| 190939381.6 | 286765231.5 | 93072720.87 | 584428751.8 | 48582453.87 | 287674171.4 | 256135735.5 | 309191620.4 |
| 283161923.2 | 286015776.5 | 790829326.5 | 342166427   | 545133075.8 | 347710892.3 | 519867319.4 | 526789754.4 |
| 435978490.2 | 121032678.7 | 320592203.6 | 629802512.5 | 113038823.1 | 418675408.3 | 375481043.6 | 401605761.7 |
| 163843412.1 | 51364918.59 | 95524584.65 | 212348322.4 | 46511703.15 | 177665871.2 | 226437824   | 153522675.8 |
| 94469738.3  | 49260451.62 | 30445186.74 | 61863815.75 | 38509063.59 | 149048827.6 | 107136994   | 114415578.4 |
| 153662171   | 114450189.5 | 41983422.02 | 169525947.4 | 43864576.34 | 99968568.93 | 98924649.5  | 106671269.6 |
| 675076910.9 | 417244106.4 | 23593205.27 | 22517366.68 | 45334302.61 | 78355930.46 | 63102983.28 | 62012594.51 |
| 485759667.3 | 263126474.6 | 374299782   | 503107151.5 | 319154981.3 | 111780513   | 122495008.6 | 148416980.9 |
| 37464593.24 | 120877245.8 | 66411836.64 | 24201863.48 | 136036167.1 | 85735381.71 | 101993608.9 | 105550527.3 |
| 174404033.6 | 152871276.1 | 95147401.39 | 239600249.6 | 161102869.1 | 141875395.3 | 189979300   | 209173289.1 |
| 54854196.05 | 66509676.4  | 26970136.64 | 64476093.19 | 28964136.28 | 101586175.1 | 68519272.93 | 65566552.99 |
| 111690185.1 | 127206726.9 | 59522761.73 | 95159312.44 | 78808985.42 | 203807091.7 | 126114854.4 | 110444951.8 |
| 43383618.47 | 32846949.27 | 77262916.34 | 60592069.59 | 8682436.758 | 33606963.41 | 36750173.52 | 38508052.94 |
| 118417346.6 | 126861833.5 | 54845107.84 | 50715516.94 | 284183982.5 | 104272428.6 | 96394809.23 | 103028884   |
| 181441189.6 | 111930556.7 | 43671933.5  | 137654149   | 25420901.51 | 80138724.32 | 96724982.25 | 115300053.3 |
| 45472626.17 | 44075664.81 | 31513440.17 | 101971876.7 | 41938068.87 | 58834014.87 | 54946236.04 | 61956232.89 |
| 210063684.9 | 91936752.18 | 155762588.6 | 213031925   | 91312131.15 | 91771766.04 | 90687473.91 | 80318654.58 |
| 56262317.67 | 91686135.64 | 44377877.38 | 18421178.5  | 55921768.34 | 92827268.63 | 55899140.47 | 48977129.96 |
| 24344518.44 | 133253825.7 | 14655115.69 | 4382722.091 | 6215891.066 | 20553694.56 | 22867452.88 | 23042076.71 |
| 145685396.9 | 35729002.14 | 49241290.68 | 161191891.2 | 15725026.03 | 18914255.63 | 21719259.42 | 20536139.42 |
| 62478896.93 | 44269655.71 | 41513935.79 | 50904255.49 | 33052039.99 | 73950627.86 | 44842635.03 | 60382215.91 |
| 49725209.1  | 67778530.3  | 93399749.59 | 60251503.15 | 89177455.21 | 58521534.84 | 65145416.74 | 62381258.55 |
| 44921727.87 | 82302779.5  | 32132661.46 | 55353170.3  | 39384824.27 | 49911139.79 | 44270310.15 | 46330049.62 |
| 72434059.1  | 54906570.22 | 80368895.48 | 65796783.81 | 55302790.93 | 58669751.02 | 65145810.27 | 44439982.67 |
| 62778560.33 | 106926822.4 | 33685365.76 | 54263466.27 | 33152953.43 | 18363893.98 | 22701565.67 | 24416601.34 |
| 12626620.44 | 70711724.7  | 1758766.868 | 4670981.689 | 11162421.42 | 10656504.85 | 13169163.99 | 13362018.06 |
| 4100561319  | 4041254631  | 2714568664  | 5549395560  | 1681510540  | 6108579389  | 5200035241  | 4719294029  |
| 921793853.9 | 499032444.8 | 320384367.6 | 1402807727  | 350877295.6 | 1880681364  | 1287899797  | 1161367244  |
| 847303541.8 | 555980294.9 | 817459298.5 | 545072065.2 | 447979645.6 | 694106782.2 | 618912412.9 | 1102327813  |
| 1039873214  | 639758351.3 | 992286641.1 | 2004732256  | 606490146.9 | 1662305943  | 1632717372  | 1293491163  |
| 208741002.8 | 842804110.2 | 1052887990  | 490866087.1 | 1502321245  | 1157855969  | 870738669.6 | 801186151.7 |
| 1178183413  | 1328079322  | 982218152.4 | 1690543131  | 1651977635  | 1204335006  | 1421987033  | 1441136392  |
| 379403553   | 2644518978  | 157134572.7 | 275177612.4 | 307132125.3 | 276570835.1 | 488306295   | 505447284.2 |

|             |             |             |             |             |             |             |             |
|-------------|-------------|-------------|-------------|-------------|-------------|-------------|-------------|
| 364358549.2 | 238929519.7 | 123035586.6 | 492216785   | 154254406   | 785747693.3 | 491468905.3 | 502683504.4 |
| 481280586.5 | 353300704.5 | 275989979.5 | 725433900.7 | 351687787.1 | 762700206.5 | 584194764.2 | 519906612.7 |
| 812152211.1 | 863803616.8 | 482505291.6 | 823386396.9 | 709045820   | 1045178377  | 768344158.7 | 724366976.1 |
| 572228512.2 | 692388441.1 | 32916758.45 | 308139094   | 89198172.57 | 420877463.3 | 338009146.8 | 324137610.5 |
| 16430115.04 | 20466148.92 | 18154028.01 | 10733128.04 | 8503075.142 | 132825340.2 | 172199093.8 | 189675545.1 |
| 636069885.2 | 1042067258  | 314616004.5 | 534426919.4 | 927580977.5 | 558733110.9 | 768734733.2 | 784011527.8 |
| 252827560.1 | 193989220   | 811177676.9 | 293188237.9 | 169178746   | 272780222.3 | 286539206.1 | 250531549.8 |
| 226044749.6 | 236504476.9 | 35462178.29 | 275413179.6 | 70291776.32 | 204502617.2 | 237689668.7 | 244537213.2 |
| 475603522.5 | 294004112.6 | 270794758.2 | 323704116.6 | 406092879.6 | 313423151.3 | 419895314.1 | 381747219.2 |
| 509757593.8 | 330133726.2 | 321106141.1 | 400960531.3 | 247167480.5 | 377177974.7 | 442098077   | 462363537.6 |
| 586642952.3 | 129431080.6 | 51624894.28 | 107358358   | 21231382.4  | 87238567.66 | 112670084.7 | 125708915.2 |
| 749362837.8 | 596557473.5 | 501259425   | 543905679   | 662636248.6 | 434594591.5 | 493498724.1 | 517176068.6 |
| 34761402.85 | 12435996.35 | 53050302.76 | 63568987.07 | 88601285.92 | 189371422.6 | 174990862.6 | 180729629.7 |
| 612017770.6 | 293530984.3 | 42751697.81 | 605218595   | 464068100.6 | 250465565.2 | 244952025.3 | 279171922.6 |
| 298979602.9 | 321305915.4 | 281328736.5 | 238263947.2 | 265226300.8 | 355106875.9 | 358155224.8 | 325759535.8 |
| 359962185.1 | 584364115.9 | 342055819.7 | 331303625.9 | 385748227.1 | 234774951.2 | 329116372.7 | 339550869.3 |
| 80264641.33 | 40202878.36 | 31440400.39 | 89469119.1  | 35227087.49 | 160747286.7 | 103606008.3 | 92072175.14 |
| 154513877.5 | 138079152.2 | 153524039.2 | 92078655.66 | 102779558.2 | 121585208.4 | 168844809.6 | 163939671.5 |
| 274759845.2 | 447695193   | 461597125.6 | 309363118.9 | 469123992.3 | 258533951.1 | 374398563.2 | 365895256.8 |
| 182772279.1 | 134962108.9 | 111441901   | 268624273.1 | 110635270.9 | 244968995.5 | 283859671.7 | 262675007.3 |
| 296447588.1 | 488841520.5 | 465051571   | 361327552.7 | 465810104.4 | 261058001.4 | 377398025.3 | 422198668.8 |
| 82565501.66 | 73227598.53 | 471051274.4 | 116035374.8 | 53420562.74 | 164883088.4 | 123615805.9 | 129311050.5 |
| 342006198.8 | 191212011.7 | 229114106.5 | 230852970.2 | 284602749.5 | 163403541.3 | 260787503.5 | 263362350.8 |
| 150196768.1 | 103732479.5 | 119481522.1 | 116032340.1 | 178258751.8 | 140973754.4 | 153413391.4 | 152574396.6 |
| 419856800   | 177640036.3 | 302532045.7 | 476567538.5 | 564452923.7 | 209190111.2 | 389680518.7 | 335178646.3 |
| 241261989.9 | 173600566.6 | 64973573.7  | 250755679.8 | 74375985.22 | 275244310.6 | 196868353.5 | 183371853.5 |
| 670440316.9 | 317114546.7 | 47799069.24 | 654074871.6 | 512466467   | 267990400.5 | 274365267.9 | 304933695.1 |
| 531418460   | 290092979.9 | 412024443.2 | 507487445.5 | 327394499   | 159107409.1 | 170999946.3 | 204941463.5 |
| 220634897.3 | 150581665.6 | 148084419.5 | 203573074   | 218654598.4 | 228606570.1 | 208244221.2 | 182937713.5 |
| 44426469.76 | 360641896   | 18351858.49 | 106340662.5 | 75724801.22 | 82088641.88 | 113712658.1 | 120517784.3 |
| 73982433.36 | 134644829.9 | 151619261.7 | 72390428.06 | 203430347.3 | 86563130.27 | 135311958.1 | 116821989.8 |
| 33385458.85 | 22781941.44 | 63527123.09 | 30508431.75 | 14774184.03 | 88279869.9  | 61033868.55 | 107834533.1 |
| 173454702.3 | 187711748.6 | 27869681.89 | 105134678.4 | 198413514.5 | 176373033.5 | 153205707.3 | 120510965.5 |
| 301272650.2 | 272593991.2 | 123197268.2 | 210497705.9 | 241721737   | 223250794.8 | 238485785.1 | 217688074.2 |
| 158449986   | 262225545.8 | 254888542.8 | 188217289.2 | 281345176.1 | 141030607.2 | 208327714.3 | 220457583.4 |
| 63020042.94 | 166783837.1 | 42106983.03 | 138318722.1 | 45435009.42 | 126366834   | 99900663.59 | 93237829.93 |
| 103252565.4 | 78996067.77 | 67777527.75 | 76297098.31 | 24289544.68 | 85639856.04 | 94087654.31 | 96003924.19 |
| 25691910.53 | 19960737.66 | 30109719.43 | 26685235.22 | 20057915.18 | 43141364.26 | 50307305.34 | 34881860.91 |
| 123540137.6 | 275680144.2 | 231787258.6 | 227215421.8 | 226294348.4 | 148143843.4 | 184190435.8 | 192871985.5 |
| 70737229.11 | 165612292.7 | 123194378.2 | 76886332.45 | 136949522   | 176447548.9 | 126787234   | 113644319.8 |
| 238792582.1 | 148418026.5 | 117466637   | 176348364.7 | 111450445.1 | 147213368.5 | 169625561.5 | 193554246.2 |
| 165031761.6 | 209456909.6 | 130842833.1 | 162731384.7 | 138376785.2 | 170501996.5 | 125054708.4 | 212375742.8 |
| 182047666.7 | 127629655.4 | 126130534.2 | 82043645.42 | 93530921.94 | 175185408.8 | 143597919.4 | 169673202.8 |
| 216586581.6 | 198317564.4 | 84314689.14 | 156984321.9 | 178086308.3 | 163482276.6 | 182175125.1 | 169219494.3 |
| 189968146.8 | 232993378.8 | 73515040.79 | 9234789.486 | 142066124   | 182382343.8 | 108327095   | 104528218.1 |
| 70804040.46 | 58964585.51 | 51598368.88 | 73983458.03 | 66315127.02 | 108259392.7 | 109378860.9 | 107150608.4 |
| 28459915.86 | 145229969.6 | 17842594.67 | 31820766.39 | 28722930.65 | 25509937.21 | 32153188.51 | 31627004.25 |
| 152492695.4 | 53527589.42 | 27491815.91 | 50733529.24 | 32492136.43 | 111955027.3 | 90646451.65 | 81440061.01 |
| 148914294.3 | 171921173.7 | 134807466.9 | 148172746.1 | 160014659.5 | 144324190   | 146633685.4 | 147466102.6 |
| 16265382.57 | 14094558.1  | 30274442.97 | 42920904.85 | 5163645.508 | 26879175.55 | 28026728.78 | 33169893.31 |
| 114898017.1 | 180723239.5 | 10487356.06 | 43337305.41 | 188554240.7 | 114275090.2 | 131618266.6 | 140264016.9 |
| 21188464.43 | 43094704.24 | 19741912.62 | 32232701.3  | 22937718.52 | 34719068.95 | 33473467.7  | 18270532.39 |
| 86744062.14 | 153000971.1 | 182609301.6 | 97357493.08 | 165919180.6 | 107986839   | 134202740.7 | 131360107.6 |
| 85083088.23 | 27173700.26 | 197152886.2 | 26069642.62 | 176803765.2 | 130904442.6 | 94581140.74 | 85859399.34 |

|             |             |             |             |             |             |             |             |
|-------------|-------------|-------------|-------------|-------------|-------------|-------------|-------------|
| 107995215.1 | 98503463.22 | 89631864.09 | 121228747.3 | 100977931.2 | 118633401.1 | 115824119.7 | 125507002.3 |
| 150067475.5 | 139332871.7 | 96424254.85 | 115255324   | 98613214.97 | 144952339.7 | 141466292.2 | 136573973.9 |
| 103110414.2 | 94291022.84 | 84373007.69 | 87735563.77 | 105083119.1 | 94849459.74 | 116816606.3 | 109584585.9 |
| 126406503.2 | 137460666.1 | 99269129.29 | 86533759.68 | 128613270.3 | 124231227.4 | 113674966.4 | 102588231.9 |
| 33326119.47 | 58342768.94 | 31635912.73 | 34730836.47 | 28035181.54 | 39375002.22 | 45791018.55 | 60385763.09 |
| 141259022.2 | 92928531.36 | 160938608.8 | 174769149.7 | 64382600.89 | 113275927.4 | 121778314.8 | 101846881.2 |
| 79869150.65 | 123543123.1 | 79009003.9  | 163318143.6 | 81835270.26 | 96682658.58 | 107205803.6 | 96611208.34 |
| 10825296.01 | 10534943.05 | 6590583.836 | 10592410.58 | 10569381.97 | 31845827.9  | 41091092.55 | 32135127.32 |
| 152307050.6 | 122059535.4 | 105486280.7 | 104082606.8 | 134457259   | 107540476   | 120731011.3 | 112478575.8 |
| 189912712.1 | 67227446.45 | 32518537.63 | 261976635.1 | 25110498.45 | 19492751.3  | 38314445.15 | 34043456.13 |
| 40074963.48 | 88406349.39 | 13411546.83 | 26243888.88 | 16897740.42 | 36435154.09 | 40701676.52 | 40939855.47 |
| 73081912.49 | 133206355.6 | 140170851.9 | 81667788.42 | 149183210.9 | 88303328.89 | 110403930.4 | 107246435.4 |
| 67249888.27 | 80743710.42 | 76789037.48 | 47909469.98 | 64553748.91 | 41374267.13 | 75272498.13 | 74548781.49 |
| 48131932.26 | 116367613.2 | 3500510.11  | 50303820.55 | 54210002.68 | 57704553.87 | 63478641    | 59399232.12 |
| 97371054.51 | 146751175   | 38305924.89 | 141284354.4 | 82107786.8  | 64044976.38 | 65439713.88 | 71226684.26 |
| 64648226.85 | 78610816.7  | 100971724.6 | 110426727   | 111336501.8 | 76605200.26 | 67262064.36 | 89565338.75 |
| 53410370.83 | 48903121.9  | 44908822.34 | 73036800.92 | 37400260.95 | 62139909.56 | 66677528.82 | 61492299.22 |
| 133776785.5 | 218142497.9 | 80553629.63 | 160039087   | 73487091.65 | 105907910.3 | 116915884.2 | 122453719.7 |
| 50573533.45 | 42302522.97 | 51072926.9  | 68706804.94 | 67783816.45 | 44544898.55 | 51370212.32 | 44267668.05 |
| 34745580.97 | 18562019.11 | 14313466.01 | 35317922.28 | 17653312.73 | 51717714.05 | 35351985.55 | 36112843.99 |
| 28254310.44 | 14952464.07 | 10640351    | 27656340.22 | 14337184.24 | 48861786.5  | 29101716.53 | 26100583.88 |
| 197024379   | 180240939.5 | 113339541.9 | 1204096.302 | 42431831.28 | 61283005.57 | 44305164.34 | 41046627.67 |
| 38052865.15 | 221107791.7 | 3153058.395 | 117528181   | 27768696.41 | 50347938.03 | 49644242.21 | 49879691.18 |
| 49799437.45 | 42808842.26 | 73653314.64 | 34234613.97 | 16312996.39 | 36961708.57 | 49616570.99 | 46328084.48 |
| 166151514.4 | 147023109.7 | 73990706.1  | 110434892.5 | 116987341   | 70830738.27 | 92581165.22 | 134629429   |
| 42678661.39 | 27399073.58 | 8949064.878 | 23075506.41 | 7715651.789 | 27927201.12 | 28083002.56 | 28653033.08 |
| 76242309.28 | 50981097.82 | 57018963.75 | 41723478.83 | 64659639.26 | 64646038.42 | 60663944.45 | 58654313.47 |
| 94305620.04 | 98841850.76 | 80564877.65 | 80394125.45 | 86437691.27 | 68555432.02 | 80652277.89 | 82706277.73 |
| 37757464    | 217026862.5 | 1135718.784 | 116483014.6 | 27839489.1  | 50322255.73 | 49606567.41 | 49225885.12 |
| 59811045.22 | 32537084.15 | 18470085.94 | 34385197.47 | 14578007.18 | 34195891.6  | 22017663.51 | 45081641.83 |
| 94221573.3  | 32100194.37 | 33014699.52 | 61485409.08 | 35104917.76 | 39327773.35 | 42708336.55 | 58711089.4  |
| 10257337.02 | 14645446.2  | 7017017.048 | 9244063.258 | 6031446.19  | 36474254.29 | 40122151.7  | 35371080.77 |
| 168769663.5 | 54428844.65 | 39440226.47 | 44767257.23 | 73677145.28 | 64396613.6  | 68219070.35 | 77521468.72 |
| 70447626.53 | 81032149.28 | 20488718.79 | 123221831.2 | 30863840.43 | 91099854.67 | 74685987.51 | 60072185.5  |
| 53848148.12 | 65908839.9  | 43163861.12 | 59397404.12 | 51105205.14 | 43129429.33 | 61914384.62 | 70289234.09 |
| 103076020.4 | 69973808.46 | 72433129.63 | 68431865.33 | 68894167.34 | 61161365.34 | 72643805.87 | 89135118.65 |
| 157225332.6 | 140693764.3 | 68311000.54 | 103014905   | 111859330.6 | 67109495.81 | 86993000.58 | 128695110   |
| 56137560.33 | 90611449.77 | 68017126.1  | 50056913.29 | 62114782.24 | 70766162.86 | 66712086.95 | 68162154.27 |
| 64543719.94 | 39579437.66 | 41821220.12 | 61277025.52 | 63379853.65 | 67918704.16 | 65188127.71 | 69672980.12 |
| 49860220.65 | 57545864.82 | 12544125.37 | 51092773    | 17787974.04 | 24966780.08 | 38203010.38 | 46998943.24 |
| 104480059.8 | 80746293.98 | 82765604.63 | 68107851.56 | 97141683.54 | 88192369.07 | 92264785.29 | 95951147.53 |
| 35775455.92 | 35892985.05 | 21708338.37 | 67563743.56 | 36743490.72 | 27560155.95 | 48974198.1  | 50514389.24 |
| 28252592.69 | 35425502.7  | 19567489.43 | 12799339.4  | 53226893.16 | 46346075.47 | 47890299.03 | 43819357.74 |
| 40262852.4  | 42364516.24 | 21634881.76 | 57026063.28 | 36775328.93 | 60881697.75 | 57083498.36 | 53887561.01 |
| 72822221.85 | 63005476.06 | 52366102.29 | 47828110.41 | 60747153.99 | 64046176.65 | 59043290.83 | 60672810.54 |
| 45322919.48 | 38585486.96 | 70728400.62 | 26223789.66 | 148489160.8 | 34762722.75 | 45862700.12 | 40073512.83 |
| 100877019.3 | 77911895.84 | 64537580.77 | 84322325.06 | 83240438.84 | 66317976.94 | 80843416.37 | 89536200    |
| 35206963.63 | 38134257.8  | 27097231.18 | 29566949.12 | 28714910.08 | 42257951.21 | 36729943.51 | 35299033.26 |
| 11173724.21 | 27134710.66 | 25216813.14 | 27888558.9  | 9121742.294 | 24290356.53 | 26215643.22 | 28668408.16 |
| 50472601.03 | 56299252.88 | 35947690.77 | 38711652.37 | 50669880.39 | 50408880.57 | 28827641.49 | 60019510.5  |
| 20116116.38 | 16745461.6  | 12893191.38 | 13775928.57 | 12472660.43 | 17595530.71 | 21485052.13 | 19425921.56 |
| 40703949.66 | 33716831.17 | 20628042.45 | 34158242.81 | 13843739.46 | 26357839.87 | 49226443.33 | 31948289.06 |
| 119466987.5 | 68932389.96 | 93617353.5  | 174341744.2 | 15220209.54 | 29804943.08 | 36695207.07 | 33738499.75 |
| 11694363.55 | 27679127.79 | 17905001.19 | 14589748.04 | 3153110.513 | 16323896.83 | 18435709.28 | 19431055.61 |

|             |             |             |             |             |             |             |             |
|-------------|-------------|-------------|-------------|-------------|-------------|-------------|-------------|
| 72364278.17 | 123662676   | 33812066.29 | 88253475.39 | 59008092.95 | 52776997.55 | 64848247.45 | 88146149.68 |
| 72239895.65 | 104888610.5 | 105556268.4 | 69987718.64 | 110256438.9 | 50892539.01 | 87490162.56 | 80043057.65 |
| 3263950.763 | 3545998.828 | 2137110.139 | 3030513.687 | 3370232.567 | 26866237.47 | 16937157.52 | 16823648.24 |
| 57747432.39 | 51999292.4  | 43141876.43 | 29249122.72 | 54199203.45 | 61191553.98 | 48654406.55 | 46293780.56 |
| 36942192.29 | 39911563.18 | 33401471.64 | 35308643.94 | 34574336.08 | 79993653.31 | 43792921.66 | 45101631.53 |
| 54715707.86 | 36861139.52 | 20706949.18 | 90272379.65 | 9571482.597 | 60470404.25 | 46999308.29 | 44746030.15 |
| 52857246.59 | 44176778.34 | 38446309.57 | 51719055.61 | 48664297.37 | 49464169.52 | 56059089.76 | 54661580.5  |
| 62939053.94 | 58428109.67 | 55789474.02 | 55409205.55 | 100388520.5 | 48379034.99 | 78353370.08 | 61327052.43 |
| 59176329.34 | 62398473.61 | 60362799.62 | 55994328.2  | 129688879.4 | 56195367.83 | 65209673.27 | 30908927.84 |
| 44081084.8  | 51243296.17 | 18819182.63 | 34728287.62 | 42728906.39 | 46201251.03 | 51382631.49 | 51651690.48 |
| 91627756.37 | 45408613.61 | 39914607.46 | 108417743   | 50475081.65 | 45434123.48 | 45645243.32 | 50726115.51 |
| 121563509.3 | 82196186.93 | 72586236.52 | 121573513.2 | 125606263.6 | 52542614.73 | 60720973.22 | 58280378.48 |
| 110344450.8 | 83833796.98 | 75409799.78 | 154588752.2 | 108673331.5 | 65813339.79 | 63522628.22 | 44883368.94 |
| 42017254.5  | 51545988.22 | 30156585    | 32161771.17 | 51746359.57 | 39744884.23 | 42041546.59 | 38188039.88 |
| 63173727.75 | 74679892.58 | 50455533.31 | 61660982.31 | 67460654    | 71094595.39 | 55537315.85 | 61622726.11 |
| 80428493.53 | 64476765.63 | 26887407.42 | 27388149.8  | 26035623.48 | 36596757.75 | 49640726.78 | 29578401.19 |
| 41428393.85 | 16660130.27 | 34101549.07 | 7386038.346 | 36987359.83 | 48024925.75 | 33400105.11 | 27061928.39 |
| 14365525.05 | 41000184.78 | 1030722.77  | 38551686.9  | 1113694.394 | 29733450.12 | 18102854.89 | 16202253.4  |
| 39932586.95 | 29195517.11 | 27450881.97 | 44436187.35 | 25537264.29 | 53939586.6  | 47524725.41 | 42035068.84 |
| 40886425.66 | 65818090.33 | 46625061.71 | 29236742.18 | 44948400.23 | 43871586.66 | 47270827.34 | 48675856.32 |
| 94624516.64 | 64024200.56 | 49831059.38 | 103803880   | 44554274.86 | 67187179.06 | 59713181.35 | 57880489.25 |
| 14870346.61 | 18780963.55 | 11882566.88 | 12068902.11 | 9076337.12  | 14918620.55 | 16349822.95 | 17274251.41 |
| 22856978.19 | 42832599.95 | 21686414.04 | 20136458.47 | 42843646.61 | 36545675.09 | 48445803.16 | 49260434.42 |
| 41167104.29 | 44482252.32 | 32567831.47 | 37715742.08 | 56803771.68 | 23030791.58 | 38520877.9  | 41857578.7  |
| 16157700.72 | 12075584.68 | 55800134.69 | 14936040.36 | 14942845.02 | 35130925.65 | 38906871.04 | 41059269.26 |
| 51880036.84 | 34214325.69 | 55989768.57 | 19541321.45 | 15586542.42 | 34427102.88 | 36343509.22 | 39132180.55 |
| 35168008.16 | 22497269.77 | 23133974.59 | 41127527.27 | 14656161.74 | 59038820.85 | 40521570.12 | 33298717.94 |
| 17848961.95 | 22164999.49 | 22589926.4  | 7725571.876 | 28680585.93 | 26810428.39 | 15376767.33 | 18514794.63 |
| 68187330.72 | 62907931.55 | 58504720.8  | 54680330.67 | 92528944.93 | 57778765.72 | 73425057.91 | 73507585.68 |
| 11782655.8  | 7262201.243 | 5366083.628 | 14638360.62 | 6631278.933 | 26493345.62 | 15419317.34 | 15236293.6  |
| 48652029.38 | 40586805.01 | 33803915.13 | 47242000.57 | 46170664.03 | 39867963.27 | 39623783.93 | 28115334.46 |
| 30124611.27 | 10074424.08 | 38296851.05 | 13005882.04 | 12439285.7  | 25251805.43 | 31663218.91 | 18233464.66 |
| 26077265.64 | 37003335.29 | 26100820.24 | 23091497.27 | 42145085.53 | 43985957.88 | 34390481.1  | 34514942.16 |
| 75473639.99 | 81539256.85 | 59475120.32 | 65444508.42 | 81858953.53 | 54553724.91 | 65308034.23 | 70495026.22 |
| 14526511.56 | 9113026.912 | 4286476.011 | 13883089.23 | 3945356.67  | 14179845.56 | 11780352.69 | 13783659.92 |
| 37521779.86 | 35973394.69 | 25862007.52 | 45396132.32 | 16525607.51 | 33723917.86 | 41659126.74 | 40900970.44 |
| 94019248.94 | 116342948.6 | 69062304.13 | 68602090.58 | 78367488.68 | 25819678.18 | 32196656.5  | 38382044.57 |
| 8836261.567 | 86932314.24 | 25547198.62 | 59291093.59 | 7986073.447 | 27316783.84 | 28466390.96 | 28288416.81 |
| 30081004.46 | 15232122.52 | 38537722.49 | 111306647.3 | 19907519.63 | 35825248.5  | 38339034.88 | 24129791.85 |
| 65633393.22 | 45131654.75 | 25369544.05 | 40884978.73 | 31580144.3  | 32601520.67 | 53521154.97 | 50688118.75 |
| 16528255.37 | 30243272.81 | 27928115.02 | 29365806.18 | 51140987.58 | 52484562.9  | 33354681.54 | 28442089.17 |
| 62337911.59 | 43678645.12 | 67171376.6  | 49142544.72 | 63132726.04 | 39834305.96 | 44229527.79 | 40755152.03 |
| 5854420.595 | 40715487.37 | 61352827.8  | 19394841.92 | 87417414.93 | 22967034.53 | 34026073.6  | 37364439.65 |
| 50009328.76 | 49954588.99 | 36320106.44 | 44298011.1  | 49744671.14 | 41364914.92 | 45105704.06 | 47002554.85 |
| 34364850.05 | 81464021.26 | 22927861.24 | 38237343.5  | 21420037.63 | 26541138.45 | 28852873.61 | 25561039.05 |
| 25949835.3  | 46746925.7  | 16665564.01 | 40666487.18 | 38944488.41 | 27535754.15 | 27927052.14 | 32114868.57 |
| 13727054.75 | 46190214.2  | 6052692.063 | 7928933.533 | 12617363.83 | 22051466.49 | 15160077.98 | 14173436.08 |
| 48960546.5  | 9786960.859 | 6818341.831 | 8514260.523 | 12735383.66 | 42632988.97 | 42486403.52 | 35706012.25 |
| 41182922.45 | 34172067.89 | 29456207.25 | 41308955.9  | 40642527.39 | 33441075.43 | 33348905.4  | 20423653.61 |
| 24147431.11 | 35400170.22 | 8939014.159 | 18559033.82 | 12069338.65 | 25203647.32 | 17185322.38 | 15732402.68 |
| 46235714.94 | 48322220.43 | 34279714.4  | 46249164.88 | 52471587.9  | 32380200.47 | 37119406.85 | 24404804.99 |
| 42195405.84 | 27451580.76 | 29098012.92 | 42019435.25 | 26187330.36 | 43977050.46 | 34956715.84 | 42496115.91 |
| 39177271.64 | 47793539.12 | 4127193.272 | 33483824.72 | 51261267.87 | 47574519.61 | 43459308.3  | 41409408.54 |
| 104739536.5 | 37451797.69 | 42646770.07 | 89250288.71 | 52703485.81 | 28268308.86 | 31377674.78 | 23037610.65 |

|             |             |             |             |             |             |             |             |
|-------------|-------------|-------------|-------------|-------------|-------------|-------------|-------------|
| 35811146.11 | 39889379.51 | 21904350.84 | 37890057.45 | 44001487.01 | 38255703.37 | 35046182    | 32586413.06 |
| 25238256.43 | 1791255.302 | 1570460.113 | 2029491.455 | 2569787.342 | 2532797.807 | 2442529.283 | 1717992.075 |
| 25874981.43 | 22983360.63 | 22610099.68 | 24170464.06 | 20374987.15 | 35853912.27 | 28816749.69 | 27743997.16 |
| 9529584.317 | 13013211.92 | 10781201.66 | 10690256.82 | 6935361.734 | 18782009.12 | 14726775.56 | 17553982.51 |
| 22215459.04 | 3579513.116 | 10228968.8  | 3472602.831 | 9971649.973 | 16511177.68 | 10674061.97 | 8409927.528 |
| 19293660.35 | 50685606.07 | 22061270.52 | 19704587.76 | 17288209.65 | 22466624.19 | 27330773.33 | 32072740.58 |
| 63207051.35 | 32025463.11 | 35354007.77 | 34897058.78 | 33023194.99 | 34127846.27 | 42886554.67 | 47936011.54 |
| 1365615.738 | 18089699.89 | 6870461.458 | 13548066.5  | 865768.8228 | 13604220.89 | 10659174.17 | 6359642.367 |
| 38567436.64 | 39373634.96 | 43790717.21 | 37200577.56 | 73257322.19 | 32227149.55 | 28808501.37 | 37825696.68 |
| 62643995.91 | 59618106.65 | 35070533.27 | 50158195.37 | 48730023.35 | 24914120.72 | 46059713.31 | 46850032.71 |
| 4730993.313 | 10836672.08 | 55648237.2  | 21729247.03 | 3832530.674 | 28434827.33 | 22240703.2  | 20252153.66 |
| 35230575.29 | 19428295.37 | 23020719.4  | 19498880.65 | 19226413.11 | 18313684.94 | 25698654.47 | 26954358.24 |
| 53676856.64 | 67409605.82 | 36104641.89 | 51531184.89 | 71899208.73 | 34260599.86 | 46825866.45 | 50165010.52 |
| 39252508.87 | 41083527.99 | 25865026.33 | 25411698.97 | 39932133.22 | 26212863.95 | 30081429.13 | 36707422.78 |
| 17148087.64 | 17423255.22 | 19070496.89 | 6290487.047 | 6529737.174 | 16201491.3  | 15555352.03 | 12875903.2  |
| 30407066.46 | 47531246.19 | 52723122.17 | 35703999.25 | 71696918.2  | 30653300.71 | 35629996.46 | 34373366.08 |
| 67103731.11 | 56717570.89 | 33887494.85 | 38913149.03 | 57848817.84 | 40109326.02 | 39320300.67 | 44274461.34 |
| 16698075.93 | 9750560.626 | 13138905.17 | 13648651.49 | 13028387.54 | 23826284.23 | 22080535.23 | 15530203.38 |
| 37253188.85 | 29648277.4  | 22742636.17 | 31396149.38 | 31432463.63 | 26771424.59 | 31875773.92 | 34062245.86 |
| 22922622.5  | 25928877.7  | 16409122.61 | 13328138.77 | 25040519.04 | 26291254.37 | 19452053.32 | 17395993.89 |
| 44594944.97 | 14193647.4  | 53225782.71 | 12759685.37 | 55966936.43 | 22149421.25 | 24615492.34 | 18925176.74 |
| 11051490.39 | 28071717.56 | 10979037.3  | 24503951.56 | 14700760.76 | 22524207.8  | 21902511.28 | 20184262.28 |
| 19814832.38 | 4667506.563 | 22785481.88 | 17835730.97 | 15407118.61 | 16832335.43 | 19548010.31 | 23372806.14 |
| 10189491.02 | 6548700.384 | 6174116.899 | 10345391.05 | 7464443.915 | 20101616.09 | 14263120.49 | 12506452.99 |
| 12060632.05 | 14213435.23 | 51347844.41 | 18881567.19 | 17782755.44 | 10318020.34 | 11429970.14 | 8948862.813 |
| 20138973.3  | 24199512.77 | 4244464.749 | 29655087.23 | 2184746.961 | 28080476    | 16437150.03 | 19430601.74 |
| 26108386.89 | 25133071.02 | 17712027.99 | 21509055.8  | 17935514.01 | 19201075.36 | 21139389.28 | 25807574.55 |
| 43797204.41 | 81483925.45 | 22137194.78 | 51711872.5  | 18744217.58 | 24760429.12 | 29761781.29 | 46301123.11 |
| 49521108.4  | 40068453.97 | 36844653.45 | 48846134.26 | 27558395.99 | 32309516.85 | 43604208.17 | 45505935.25 |
| 26531106.23 | 23412202.18 | 16908050.38 | 34683410.6  | 22772270    | 31019939.19 | 29601209.97 | 29634018.56 |
| 12118528.99 | 16885497.91 | 7101669.067 | 8069758.458 | 7275615.085 | 12753257.74 | 14673939.67 | 12040568.48 |
| 37657878.6  | 27966047.03 | 32250741.62 | 34750695.57 | 30612640.69 | 20488769.08 | 35784927.83 | 36158564.3  |
| 46125755.93 | 42385890.16 | 32414548.15 | 43877321.16 | 45314308.3  | 33534874.92 | 43432710.94 | 40320767.84 |
| 25154101.82 | 43786615.71 | 28343647.99 | 33497196.91 | 30809178.1  | 33198975.22 | 38457369.07 | 26257987.06 |
| 33423544.42 | 23829326.09 | 17349588.66 | 18626637.53 | 21793625.98 | 29547247.1  | 19654830.1  | 20947335.52 |
| 14790759.85 | 16476813.35 | 22729803.73 | 10542148.68 | 24279135.9  | 22944308.57 | 15711660.05 | 14622886.32 |
| 25410950.86 | 20593054.23 | 16501629.08 | 21355221.13 | 22027772.04 | 24843135.79 | 22372126.52 | 23453535    |
| 27387176.49 | 23722576.8  | 19871212.57 | 25739183.56 | 31620087.96 | 22317426.79 | 24356074.21 | 29029943.22 |
| 24370850.45 | 23023681.04 | 16527688.6  | 16714504.44 | 22628771.9  | 20187426.29 | 24256298.6  | 21441514.22 |
| 39607648.95 | 18492220.88 | 6464608.43  | 9946419.429 | 15076414.36 | 11252600.85 | 13995414.68 | 17105567.78 |
| 29907883.87 | 37292567.2  | 18050411.32 | 31403122.59 | 17436726.19 | 23331710.97 | 18924272.75 | 28933000.66 |
| 3885360.915 | 3603162.797 | 3098143.666 | 3487744.111 | 3530864.779 | 8350925.447 | 10723550.65 | 10791432.79 |
| 18155825.02 | 15869664.72 | 17387967.9  | 15585417.95 | 628235.2972 | 20026073.27 | 22534820.16 | 27299229.44 |
| 69933327.59 | 64040694.87 | 25696465.32 | 73626755.84 | 40311954.84 | 21673786.73 | 45666198.78 | 45002921.43 |
| 59628997.92 | 58557796.28 | 30758432.9  | 45573080.13 | 32714285.41 | 13708604.59 | 15389378.64 | 25245356.68 |
| 72671132.67 | 25648737.89 | 21631330.45 | 73412054.05 | 27888678.02 | 19325066.66 | 19976028.45 | 19590234.46 |
| 18747367.14 | 74296412.56 | 7440110.841 | 22176458.29 | 12317135.78 | 10760428.33 | 16054450.81 | 16905090.98 |
| 23505849.29 | 36279017.98 | 39314672.14 | 26050629.74 | 43755194.49 | 19651559.77 | 31993683.5  | 30520489    |
| 30927826.35 | 38127848.21 | 29072340.01 | 32618551.98 | 36455571.45 | 34820428.05 | 32737015.58 | 27876242.03 |
| 19940573.34 | 34405154.97 | 37628519.73 | 37952804.82 | 31016555.2  | 34608108.09 | 33594576.34 | 33578368.92 |
| 25167150.64 | 60619188    | 40608580.96 | 26956711.8  | 19992072.21 | 34507879.63 | 30201690.49 | 31909497.9  |
| 11872760.99 | 13389708.47 | 11828818    | 10409117.94 | 7310835.069 | 24335053.36 | 18072668.01 | 15298281.27 |
| 5762573.219 | 6414218.394 | 9709957.289 | 5978534.848 | 4740801.624 | 12362292.11 | 15723600.39 | 11837705.09 |
| 39377352.28 | 73270854.68 | 23320049.77 | 31087368.56 | 34165237.62 | 22241326.64 | 31345881.43 | 29582505.87 |



|             |             |             |             |             |             |             |             |
|-------------|-------------|-------------|-------------|-------------|-------------|-------------|-------------|
| 34314807.6  | 72440023.21 | 3885769.511 | 5463771.388 | 4778933.864 | 8497435.294 | 14155599.03 | 12450454.71 |
| 30037796.53 | 34131437.87 | 19409369.83 | 32558344.13 | 28399228.9  | 24328162.86 | 30040466.52 | 31432626.06 |
| 32498032.44 | 39523057.86 | 14316911.29 | 18465658.46 | 21513154.03 | 28432303.56 | 18515141.69 | 16069207.41 |
| 41564568.62 | 68129842.15 | 23541122.66 | 46157109.52 | 24499055.83 | 33004437.23 | 31851637.61 | 37927036.14 |
| 4884714.554 | 4890433.813 | 6270168.185 | 2565108.935 | 9111684.765 | 8677149.933 | 6563900.37  | 5077910.073 |
| 54114683.39 | 36989822.82 | 34188329.35 | 49184601.15 | 39955109.5  | 32622044.51 | 37870365.9  | 40393323.86 |
| 21258468.68 | 18121167.02 | 13063005.56 | 13764359.9  | 18734892.55 | 20358069.2  | 24652539.36 | 17882245.24 |
| 21263616.04 | 25308587.19 | 21170456.79 | 22063729.38 | 19602739.91 | 20328339.06 | 23667637.48 | 29412241.17 |
| 11359166.51 | 9906952.063 | 2070683.453 | 12432923.92 | 52134138.47 | 20242742.31 | 22225167.87 | 23543091.11 |
| 17697641.94 | 31077606.33 | 31002104.13 | 18741509.04 | 29988004.52 | 20894705.88 | 25259235.6  | 26171712.89 |
| 19583928.18 | 6854389.215 | 12112394.33 | 5932781.117 | 31239416.75 | 11617660.79 | 11815348.14 | 7403888.632 |
| 33279982.94 | 48757615    | 13749841.06 | 43936616.28 | 22879448.32 | 30956708.44 | 30860439.71 | 32276148.52 |
| 23401517.49 | 21413928.03 | 9820914.514 | 28222359.12 | 11001133.04 | 21553038.83 | 25622093.37 | 25122855.86 |
| 1777356.567 | 11654908.6  | 1560557.362 | 1140312.769 | 4351691.71  | 4734908.281 | 4377532.097 | 3663977.956 |
| 11384122.38 | 12294365.05 | 12405114.28 | 8515619.92  | 5683233.756 | 9511659.463 | 10566486.43 | 13033379.76 |
| 1999119.647 | 18534728.01 | 10952719.16 | 1291383.399 | 12817506.4  | 7329330.797 | 5210622.063 | 4792009.916 |
| 40102724.78 | 46608430.52 | 11089961.91 | 239067.1865 | 16738771.66 | 19443789.13 | 27748452.28 | 16813618.65 |
| 64575736.99 | 6310078.458 | 2189802.491 | 2127019.041 | 50746144.5  | 10734946.91 | 7884385.954 | 13240719.9  |
| 20586570.82 | 20057425.79 | 9658846.682 | 11679958.41 | 12945308.9  | 9786739.746 | 14114668.62 | 16383087.9  |
| 17826292.12 | 29038378.43 | 25681335.63 | 24698100.73 | 24755819.68 | 24579428.9  | 26058127.57 | 27880431.92 |
| 21043371.57 | 21268609.33 | 15901234.99 | 25290011.53 | 26338395.17 | 29926153.93 | 25655594.45 | 30130351.96 |
| 11412966.06 | 11687154.26 | 7303263.748 | 14997427.87 | 15445096.63 | 29845180.24 | 20597820.11 | 20174339.66 |
| 13145032.3  | 30064478.05 | 12807044.46 | 23762761.69 | 16862162.03 | 22958063.26 | 25828596.49 | 21989709.92 |
| 13236068.66 | 14517299.18 | 6131182.36  | 17039581.43 | 18406186.08 | 21399790.4  | 20364399.09 | 17275241.95 |
| 2281360.021 | 16474098.31 | 16241569.69 | 15539038.5  | 19071197.06 | 13723462.6  | 18146913.14 | 17677880.91 |
| 9534294.502 | 10670332.73 | 21405972.9  | 8841222.655 | 11606993.42 | 9737232.43  | 17390830.97 | 13402319.89 |
| 10592883.92 | 14739411.63 | 14052479.6  | 18790192.06 | 10823285.71 | 16655498.47 | 17536543.94 | 17890591.94 |
| 32128184.69 | 34332113.91 | 19458996.12 | 60143038.61 | 29392631.12 | 14132832.14 | 19405217.52 | 25143631.45 |
| 11108493.83 | 19690119.49 | 9913196.054 | 8357862.368 | 8356056.85  | 24572223.07 | 17811522.09 | 12585194.21 |
| 14278731.5  | 10936309.2  | 10384698.85 | 19002500.48 | 15389207.84 | 9674621.692 | 11668715.35 | 14996408.03 |
| 39448735.04 | 32005460.42 | 28574847.43 | 38305245.7  | 21541274.26 | 28383127.05 | 26925608.6  | 25145173.08 |
| 37237323.18 | 30545133.48 | 13051431.73 | 17314005.15 | 22050316.4  | 16285181.75 | 13609994.73 | 15256623.17 |
| 22419431.09 | 32642942.75 | 35769227.62 | 32977667.21 | 37336149.21 | 25871448.62 | 30519850    | 30427409.17 |
| 7271855.131 | 27758769.56 | 9240367.38  | 14467331.37 | 45961108.59 | 9619160.404 | 6557207.44  | 12751382.43 |
| 39088002.62 | 52325697.3  | 19281427.5  | 29460263.36 | 32442042.08 | 26726347.76 | 20784142.75 | 20341219.51 |
| 17823230.31 | 19694437.34 | 14059120.85 | 22719885.92 | 16950998.21 | 16380210.29 | 16933578.48 | 18889856.74 |
| 4311103.877 | 13498052.65 | 6415820.017 | 2059127.954 | 13322246.82 | 5075962.333 | 5125201.012 | 7148732.36  |
| 5520177.807 | 4944804.69  | 4161960.579 | 5623530.357 | 4921900.308 | 8300326.771 | 9856966.458 | 10379288.43 |
| 19977346.26 | 13899638.08 | 7846474.957 | 15021203.87 | 11151730.71 | 13106409.46 | 15542458.58 | 17848208.98 |
| 636788.909  | 12135739.8  | 12171599.61 | 11268403.59 | 13731870.6  | 20757284    | 15466541.96 | 16200445.61 |
| 12375937.82 | 52275280.8  | 7893511.359 | 15122351.1  | 11827755.27 | 12044939.21 | 14658960.41 | 18429830.75 |
| 5436960.322 | 4892247.655 | 3317607.83  | 3232134.248 | 4431809.448 | 4491113.236 | 6430590.964 | 5715234.78  |
| 13885476.82 | 13412803.22 | 11889173.38 | 22049736.34 | 7667385.709 | 14956622.05 | 19976977.7  | 17505284.67 |
| 47295538.47 | 2872358.727 | 6544972.844 | 4731296.523 | 18404222.32 | 8155498.869 | 9100159.745 | 9652825.961 |
| 21615612.17 | 10397801.88 | 24003506.19 | 12407308.28 | 25441888.23 | 24522560.78 | 18762144.97 | 13169358.43 |
| 10729995.11 | 14256922.3  | 4319194.832 | 21966246.86 | 9761223.01  | 21743677.02 | 20720681.49 | 21268021.4  |
| 5132492.56  | 15043179.41 | 4642346.247 | 6742105.573 | 11938149.08 | 11753179.24 | 11051840.7  | 8966495.038 |
| 17078095.96 | 41349028.67 | 8918529.679 | 50081014.11 | 8210536.484 | 22482469.34 | 18647812.93 | 17482006.06 |
| 34827369.04 | 34542855.18 | 21174739.09 | 14299686.41 | 29501870.4  | 19848336.7  | 20200758.97 | 31875264.07 |
| 2427637.547 | 2364716.658 | 9526793.979 | 5941474.824 | 24708682.48 | 1926709.098 | 2511857.799 | 1921050.121 |
| 18507913.08 | 50424043.14 | 20793788.02 | 8569827.219 | 16512437.64 | 7275119.067 | 7330045.017 | 3600502.37  |
| 20919302.67 | 13272184.44 | 17158687.95 | 12466517.17 | 19042529.11 | 12312004.5  | 16363351.67 | 15262784.58 |
| 4606276.996 | 3924064.794 | 3514132.421 | 2185330.317 | 5546140.796 | 8032593.166 | 5339678.717 | 3902065.216 |
| 41731159.73 | 19369854.84 | 25700011.48 | 48245019.8  | 20671478.94 | 20483099.71 | 17889965.21 | 18757392.41 |

|             |             |             |             |             |             |             |             |
|-------------|-------------|-------------|-------------|-------------|-------------|-------------|-------------|
| 10862861.05 | 9366147.537 | 6563185.666 | 17202801.91 | 9092095.214 | 8017122.001 | 8221366.919 | 13551348.25 |
| 7062064.057 | 8698293.16  | 11760776.04 | 6016800.74  | 5828408.338 | 5922638.146 | 8396015.982 | 8900323.97  |
| 33639310.86 | 15753873.39 | 14948904.44 | 34596005.94 | 11449522.17 | 11048080.76 | 16222275.65 | 19702824.07 |
| 11091642.79 | 11219352.86 | 10733938.06 | 12683501.31 | 7745516.763 | 11478351.15 | 12057469.92 | 11624737.77 |
| 17896306.38 | 13308843.2  | 12569206.27 | 15552549.64 | 14599564.91 | 14118809.65 | 16054865.46 | 13666369.68 |
| 26458313.13 | 16407347.49 | 27900681.71 | 39012201.48 | 26617758.83 | 17198560.21 | 15565490.25 | 14736389.42 |
| 32891989.89 | 14912077.19 | 14176633.46 | 32882830.91 | 10763878.56 | 10369094.06 | 15486999.9  | 18796683.81 |
| 15878887.24 | 17186996.8  | 11607595.67 | 12120864.26 | 21027162.89 | 16954986.34 | 14649394.42 | 14205460.25 |
| 26093855.67 | 24045463.96 | 20068828.77 | 34642983.86 | 23681260.65 | 16274250.24 | 16980762.23 | 17002194.94 |
| 6192432.802 | 5955182.259 | 9609703.111 | 12493212.61 | 2931903.909 | 9336718.613 | 6834850.481 | 7665218.175 |
| 24067583.99 | 21977314.83 | 26012833.88 | 21331828.67 | 12617326.35 | 13982736.26 | 22323380.67 | 23401092.2  |
| 3369114.275 | 1604304.497 | 490543.4876 | 414340.9195 | 1203039.882 | 2917078.555 | 2735797.517 | 1516559.626 |
| 13649960.36 | 20474439.9  | 7903464.032 | 12245184.77 | 14136154.99 | 19188207.67 | 15097507.31 | 11818657.63 |
| 11329232.73 | 8241047.614 | 6871360.63  | 8237783.727 | 9022254.778 | 8870493.211 | 11291082.17 | 11427344.41 |
| 15888005.8  | 41514892.95 | 8784632.831 | 15906539.04 | 10025234.81 | 13809809.21 | 18501556.13 | 14309429.09 |
| 18873980.39 | 17126534.15 | 14196919.88 | 13093755.31 | 22879499.01 | 13323331.83 | 14390674.53 | 14523846.69 |
| 27926261.43 | 19431501.83 | 14181501.93 | 19440468.93 | 23180267.61 | 17954895.44 | 18103537.2  | 18599506.48 |
| 9707031.503 | 4617635.087 | 25366452.11 | 10656234.2  | 5784695.489 | 6092444.037 | 7452761.726 | 6403513.205 |
| 3121467.611 | 7051830.113 | 5276838.998 | 2991124.638 | 1330063.65  | 4448936.889 | 4770468.684 | 4672970.555 |
| 9561137.6   | 7606597.467 | 7052349.187 | 6793296.329 | 31301650.38 | 14561029.03 | 14662680.01 | 18557236.57 |
| 3346934.375 | 6133905.18  | 1881763.29  | 8856311.446 | 1931800.904 | 7585947.502 | 9773476.519 | 9954940.911 |
| 5364939.547 | 10215162.07 | 9415301.054 | 6901491.524 | 7682496.933 | 7507742.377 | 7729440.015 | 7375972.436 |
| 14031272.63 | 6075242.704 | 5114498.727 | 1871622.722 | 32113040.77 | 10582174.93 | 7417409.067 | 6039468.475 |
| 5143299.851 | 4165959.496 | 1673758.656 | 4243212.223 | 3421480.551 | 5329787.972 | 5485387.053 | 4433824.05  |
| 21576157.46 | 16023151.61 | 9465630.908 | 16720592.08 | 16106526.34 | 12693256.26 | 14292715.86 | 16826174.7  |
| 15442346.06 | 17171476.36 | 13912600.69 | 17924176.17 | 17076608.57 | 11325704.53 | 13313283.98 | 12537251.07 |
| 12088768.94 | 13404983.67 | 8899033.843 | 17744491.35 | 9835686.032 | 10960479.62 | 11780270.4  | 13898610.92 |
| 26327938.13 | 32236458.87 | 12875607.18 | 21613298.87 | 30696188.28 | 13476694.92 | 20403734.4  | 25322781.15 |
| 9520533.105 | 6691243.194 | 4376419.2   | 3986587.251 | 3091077.765 | 9030223.352 | 8448835.812 | 8937363.197 |
| 39482313.9  | 35298399.18 | 16200041.7  | 27967649.56 | 29857575.44 | 10943028.14 | 18855874.46 | 18327513.94 |
| 6146799.329 | 10072745.12 | 22676034.58 | 25308854.13 | 8319851.818 | 7610942.815 | 6279028.917 | 7739513.585 |
| 22177803.62 | 6588017.072 | 13004640    | 13792262.38 | 17753731.25 | 12578356.57 | 17488429.85 | 17337871.28 |
| 2457209.514 | 3475814.948 | 2824075.765 | 2992737.762 | 16697879.78 | 4392581.018 | 5566452.478 | 6674109.538 |
| 24167605.65 | 21602152.16 | 9053146.412 | 29180276.81 | 13079851.61 | 16464258.99 | 17396126.71 | 17696789.1  |
| 1759307.38  | 1821863.537 | 2240791.995 | 1407881.515 | 8415377.594 | 4592882.475 | 3406512.448 | 3621183.756 |
| 13829953.33 | 540084.6761 | 391408.8602 | 433207.4934 | 2404760.941 | 3114906.852 | 1784226.696 | 2287164.678 |
| 7151784.156 | 13979814.36 | 18034701.73 | 7492121.751 | 8905476.743 | 9263996.952 | 10129208.61 | 10183871.37 |
| 7789588.504 | 5936136.24  | 3249790.76  | 6910510.174 | 5359779.393 | 7247737.601 | 6596218.02  | 6726369.164 |
| 17550721.61 | 20522443.62 | 16509170.81 | 14016252.2  | 21120879.99 | 15043961.45 | 17393116.39 | 11012959.29 |
| 1323284.266 | 1505733.469 | 987051.9251 | 1310238.689 | 1450777.978 | 3433802.781 | 5068004.252 | 5161821.006 |
| 2998321.645 | 4803492.988 | 495314.6815 | 2984536.13  | 1862212.917 | 3354881.464 | 3151723.576 | 2798641.172 |
| 15072809.75 | 17751681.86 | 18701242.85 | 24280891.15 | 9449063.968 | 9284587.602 | 7134584.56  | 7621363.109 |
| 4003723.876 | 2719762.981 | 695001.8745 | 3742270.952 | 417895.6596 | 3553444.796 | 2904712.855 | 2818604.394 |
| 10586410.99 | 30871478.87 | 6741843.202 | 8883512.685 | 5262186.624 | 6567048.217 | 8428941.653 | 7878950.49  |
| 8293117.228 | 11574876.6  | 5360052.458 | 9124065.154 | 8339619.151 | 11917579.33 | 12596414.27 | 8882474.664 |
| 1955281.679 | 1668896.44  | 984464.7925 | 923311.9652 | 1590070.301 | 4046982.621 | 3919192.848 | 3649916.724 |
| 13727181.52 | 11653599.93 | 11920887.62 | 17475141.16 | 22899364.01 | 9285975.14  | 15094879.77 | 18501056.82 |
| 3942948.681 | 4367075.678 | 2586068.35  | 4772408.353 | 3455788.893 | 5547314.524 | 6200064.915 | 5419231.167 |
| 10377218.52 | 5484673.803 | 9498278.607 | 8526384.828 | 12792698.12 | 13210085.63 | 11552496.63 | 12173801.16 |
| 13949160.2  | 6651082.209 | 1858228.672 | 1322925.06  | 22074317    | 8171743.762 | 5773539.848 | 3932623.657 |
| 8746206.824 | 6613305.757 | 7413325.547 | 8854069.942 | 4724638.803 | 13157365.52 | 6973951.434 | 8032167.165 |
| 11565267    | 8320515.467 | 2404645.68  | 13380112.66 | 5315218.273 | 4219694.132 | 8791955.963 | 6311671.296 |
| 10380245.65 | 13151193.45 | 9080598.034 | 14365001.96 | 12280778.81 | 8619913.348 | 13326477.62 | 11575204.44 |
| 2989488.266 | 1516438.591 | 4172164.228 | 1493942.447 | 3959591.435 | 2541858.146 | 2915220.371 | 3528674.271 |

|             |             |             |             |             |             |             |             |
|-------------|-------------|-------------|-------------|-------------|-------------|-------------|-------------|
| 7885938.165 | 10498412.34 | 6978247.977 | 6424091.114 | 8770949.115 | 12703856.51 | 9906322.485 | 10158266.64 |
| 18214639.1  | 12885485.43 | 15265797.25 | 15211077.4  | 15274846.73 | 12313393.18 | 14509394.94 | 13862385.98 |
| 3206899.167 | 6234714.088 | 2618675.772 | 7515003.43  | 2331077.544 | 6297509.224 | 5004808.673 | 9460706.765 |
| 3727478.246 | 3408534.55  | 4698669.639 | 3415580.575 | 1886822.921 | 6345105.271 | 4252738.721 | 5438034.978 |
| 17332669.14 | 1336345.509 | 3412123.598 | 10637674.49 | 891881.7552 | 4630991.989 | 4578332.594 | 4016942.591 |
| 9463404.349 | 5360882.165 | 15316371.05 | 15815443.35 | 5477738.472 | 7768652.718 | 5931187.549 | 6070194.839 |
| 1303757.604 | 1400759.7   | 2812895.856 | 973101.7615 | 1093319.384 | 2964854.823 | 3353041.536 | 2199163.682 |
| 9947481.752 | 17371652.6  | 1350572.84  | 3385614.176 | 909651.9153 | 2674431.795 | 4067266.726 | 3975033.089 |
| 1307408.115 | 6948610.442 | 1948261.688 | 1513229.842 | 5347574.614 | 6242429.697 | 4994890.392 | 4806533.202 |
| 13605367.37 | 12435035.11 | 10952860.45 | 14809096.48 | 19484901.86 | 7330006.139 | 9928769.024 | 10901674.56 |
| 1672696.556 | 795967.9037 | 3132047.815 | 782933.7686 | 2785128.512 | 1707320.49  | 1455930.446 | 1813258.305 |
| 3215892.264 | 15726258.5  | 2606664.977 | 4097114.559 | 9748894.069 | 4387757.698 | 6017658.208 | 3419157.29  |
| 4723570.472 | 4794534.105 | 2163687.682 | 9805550.403 | 1445838.204 | 5554261.06  | 4694607.615 | 5548107.767 |
| 1237858.891 | 416275.022  | 1483335.108 | 457212.8694 | 18988389.11 | 944273.5354 | 1148253.633 | 1693313.215 |
| 5120986.202 | 8010580.471 | 14480379.29 | 20572331.28 | 7663732.192 | 7935133.228 | 6498572.806 | 5851496.716 |
| 7234898.088 | 4452721.642 | 13731228.02 | 4328784.192 | 2016276.929 | 5734056.289 | 6443083.718 | 7206406.849 |
| 12942094    | 14546812.55 | 9163789.192 | 13322848.23 | 15514824.35 | 9631975.39  | 9903000.91  | 8515391.706 |
| 6606432.816 | 17739898.34 | 3088715.065 | 3957852.609 | 5039114.349 | 8480089.344 | 5422061.671 | 4898827.438 |
| 10153751.11 | 6516256.024 | 6191788.459 | 4083931.184 | 7830641.074 | 7842253.716 | 7669935.19  | 6819043.326 |
| 1917016.949 | 1604934.256 | 1662294.104 | 1469327.597 | 1802631.906 | 3021117.009 | 3199371.82  | 3466163.289 |
| 3997301.285 | 21814980.35 | 2061636.535 | 7679255.039 | 10557444.8  | 6408669.521 | 8069556.777 | 7541326.366 |
| 17052045.04 | 12959607.32 | 7861712.485 | 13057732.67 | 13834016.79 | 9070913.163 | 11184600.33 | 11886407.32 |
| 6318106.336 | 7333796.478 | 5535057.94  | 3371650.693 | 6143082.246 | 8153672.032 | 8067230.575 | 6803676.218 |
| 9996129.535 | 11540781.15 | 6641992.304 | 9653985.722 | 6766740.563 | 6849772.67  | 8123592.831 | 7033124.562 |
| 5041036.218 | 5135112.518 | 4939796.503 | 4300093.312 | 5249611.201 | 5657412.818 | 5545841.105 | 5900393.476 |
| 5144124.964 | 6359998.755 | 6022623.66  | 4594071.363 | 7337401.001 | 3397133.422 | 7368034.011 | 6370853.237 |
| 4853811.145 | 4836294.795 | 4325728.998 | 11887214.08 | 3366760.833 | 7618401.53  | 6410520.077 | 5678298.379 |
| 520359.3147 | 762561.4462 | 1570842.826 | 1042662.12  | 484158.1956 | 1379191.206 | 1695059.994 | 1621293.584 |
| 8187512.414 | 14924231.25 | 3959327.673 | 3985329.382 | 7839413.283 | 9710286.554 | 6952272.508 | 8927256.073 |
| 6605977.988 | 6045540.772 | 4016118.601 | 3572079.362 | 5538070.447 | 5864102.114 | 5508723.878 | 6380398.343 |
| 4441518.421 | 3218410.156 | 10501525.73 | 4571777.547 | 1647788.407 | 3825806.566 | 4654910.67  | 4777692.642 |
| 1945103.094 | 1063415.261 | 364779.1863 | 9810791.23  | 540849.4724 | 1721728.567 | 1394051.29  | 1308274.717 |
| 3572249.85  | 3129646.177 | 2068664.124 | 1940761.513 | 4146053.834 | 4439919.543 | 3881073.924 | 4351165.332 |
| 7325706.441 | 7643988.913 | 3088525.462 | 2976960.928 | 2389523.786 | 5694823.067 | 4968788.779 | 4787074.599 |
| 5561826.363 | 2941355.687 | 4146061.543 | 1369434.877 | 789098.771  | 2658831.279 | 2448422.575 | 2354082.869 |
| 5871466.968 | 6131466.961 | 2066700.029 | 4959595.193 | 4770822.436 | 8871259.571 | 5345402.602 | 4730706.941 |
| 8727417.149 | 10214255.97 | 7882884.714 | 8046523.523 | 11002148.76 | 8861171.006 | 7491985.584 | 6617296.948 |
| 5554067.33  | 4723458.633 | 6768088.984 | 9049670.128 | 6517156.971 | 3981128.735 | 8239666.164 | 7043219.32  |
| 5297829.688 | 4641795.264 | 2683309.025 | 5112108.004 | 7654083.034 | 5585847.553 | 5764297.687 | 3904395.326 |
| 1842008.587 | 1933969.197 | 1243482.21  | 1787832.13  | 1415034.809 | 3058688.52  | 2893835.794 | 3925166.464 |
| 2704135.378 | 1132651.707 | 3650303.335 | 1511510.811 | 7772885.714 | 5873640.177 | 4039171.11  | 4214089.269 |
| 3445097.539 | 17805802.62 | 1467790.7   | 1906477.823 | 4824335.445 | 1930110.514 | 2017100.036 | 2884788.958 |
| 3373906.036 | 3738133.532 | 2565202.309 | 3211104.959 | 3238719.378 | 3002659.965 | 4404781.131 | 3245199.896 |
| 7541235.914 | 7771185.946 | 1116760.998 | 9494805.31  | 2861500.153 | 5431827.398 | 6819969.767 | 5402717.848 |
| 1187963.822 | 1466571.915 | 2856676.71  | 1278868.386 | 2210720.798 | 2721190.818 | 2811236.476 | 2880751.229 |
| 6128964.437 | 3722757.329 | 3378435.605 | 10128895.95 | 3994581.865 | 3224343.759 | 1815659.858 | 1888858.294 |
| 5419675.814 | 4652860.475 | 2713490.294 | 4294528.249 | 3659780.427 | 4705246.661 | 5332932.429 | 5742923.411 |
| 4782577.783 | 1838123.314 | 3691985.266 | 718271.1361 | 5141793.623 | 2870929.992 | 2647453.306 | 1817995.276 |
| 5609711.036 | 1688399.983 | 2976045.771 | 2977161.603 | 1699037.74  | 4296446.622 | 3386292.262 | 4572246.328 |
| 2471786.351 | 2607164.346 | 1616805.814 | 5365638.182 | 1877452.039 | 5641709.709 | 4224538.747 | 4021708.144 |
| 6084657.869 | 3080664.248 | 4348955.353 | 3187264.271 | 5611509.201 | 7706939.992 | 5274664.28  | 3804073.8   |
| 6776370.769 | 4945538.351 | 1334268.543 | 4241497.759 | 5754640.441 | 4720187.545 | 4603749.663 | 4518097.219 |
| 9458507.506 | 7463647.989 | 5678586.686 | 6152914.145 | 12071860.09 | 6891267.967 | 7701689.618 | 7745680.837 |
| 4113748.334 | 7839325.6   | 6428215.77  | 4807698.103 | 2775325.898 | 7307406.974 | 4959048.846 | 4753637.195 |

|             |             |             |             |             |             |             |             |
|-------------|-------------|-------------|-------------|-------------|-------------|-------------|-------------|
| 10444323.3  | 15635855.88 | 2463420.37  | 13257748.73 | 7919414.103 | 5352282.931 | 6521560.372 | 5460190.079 |
| 934386.8034 | 1145425.015 | 661848.5145 | 1012658.458 | 723014.1132 | 1804188.175 | 1260074.625 | 1905751.316 |
| 7227523.648 | 7952257.207 | 3286449.594 | 5380780.924 | 5986288.312 | 5522268.354 | 4798310.161 | 7176226.908 |
| 385103.9822 | 450308.4068 | 2588681.404 | 432137.6709 | 4739937.703 | 2273469.218 | 2076769.934 | 1845430.158 |
| 12516039.08 | 4007805.069 | 3098087.477 | 6800687.308 | 9311559.791 | 3592285.221 | 6037058.465 | 4139533.203 |
| 8326291.07  | 5998768.782 | 9026892.011 | 12308936.16 | 2661353.252 | 4582694.701 | 9847462.032 | 7479314.368 |
| 15625196.47 | 2546451.463 | 1986969.286 | 4602791.111 | 2469682.053 | 3366776.784 | 2856207.717 | 3420220.582 |
| 4434903.662 | 2361947.626 | 1990112.078 | 4258359.732 | 1273666.175 | 3326141.742 | 3885843.86  | 5387435.012 |
| 10342697.67 | 8714556.528 | 4839028.883 | 8036828.151 | 6695797.282 | 5803576.214 | 7359462.104 | 7908215.913 |
| 3429856.799 | 2590044.916 | 426479.7962 | 2954454.756 | 2191916.432 | 5038550.324 | 3070807.156 | 2866622.227 |
| 15007887.03 | 4920538.282 | 3590509.974 | 1739959.725 | 2585285.459 | 3657195.27  | 2872018.074 | 2806058.93  |
| 5651576.446 | 13987530.92 | 2572392.472 | 6788996.578 | 4718082.104 | 3645326.213 | 3928234.634 | 3983846.491 |
| 4654764.442 | 2032982.719 | 1412794.686 | 2215888.826 | 1030817.37  | 3910188.019 | 2786556.889 | 2869543.25  |
| 2896601.624 | 5866264.031 | 2721810.17  | 4191173.812 | 1961635.482 | 2629115.068 | 4672830.566 | 3738533.958 |
| 7904861.508 | 5511137.847 | 5113332.246 | 7067196.565 | 3728929.544 | 4130744.094 | 2164010.676 | 4697987.257 |
| 4301454.609 | 2690788.237 | 1998858.088 | 2845542.923 | 2283526.25  | 2774555.034 | 2512468.212 | 4035250.939 |
| 7894049.096 | 6788054.213 | 5040379.644 | 6322841.696 | 6221171.902 | 6369008.733 | 6093652.068 | 6030488.516 |
| 3960913.846 | 5565893.705 | 3261328.157 | 5306827.641 | 6132924.501 | 4440622.7   | 5041668.462 | 6266455.59  |
| 6989876.939 | 6657580.7   | 2948661.604 | 2090313.04  | 3237171.916 | 5931275.15  | 3585211.836 | 3421828.546 |
| 4550522.773 | 4623284.704 | 3450879.198 | 4086218.181 | 3583387.188 | 3109422.81  | 4045193.639 | 3782347.962 |
| 9699810.066 | 12964278.62 | 3006957.258 | 4878113.717 | 5709252.313 | 3179174.975 | 3944075.453 | 3663623.423 |
| 1848706.486 | 1170824.634 | 1000321.311 | 1615638.594 | 647483.1483 | 1509701.278 | 1226395.942 | 2054779.183 |
| 2966148.056 | 5868172.946 | 1664250.288 | 2527523.275 | 1349756.906 | 2952918.648 | 3436569.796 | 2547389.806 |
| 1890167.158 | 2989133.476 | 2697437.695 | 12778882.18 | 1445427.487 | 4088501.776 | 4427944.458 | 3804940.327 |
| 2551231.363 | 2164354.315 | 1823900.107 | 2830051.844 | 1592989.502 | 2243111.747 | 2842228.778 | 3433847.538 |
| 7020663.576 | 8153987.993 | 4948358.311 | 6580930.078 | 4033983.235 | 4430369.69  | 6658287.355 | 5084863.847 |
| 4632127.124 | 4922053.039 | 2804162.799 | 3935192.16  | 3410147.598 | 3863739.669 | 7398601.408 | 5319626.493 |
| 7275934.499 | 2950087.81  | 4034180.494 | 6936299.2   | 4205592.836 | 5872459.574 | 4602907.736 | 5529199.254 |
| 7717826.161 | 4119488.655 | 6429235.181 | 6732028.601 | 4415339.084 | 4356992.415 | 5383169.751 | 5707334.276 |
| 1879978.021 | 4822279.064 | 2157379.438 | 3215698.186 | 844676.8188 | 1848973.742 | 1596042.872 | 2152978.679 |
| 1891196.64  | 3431040.803 | 2444737.576 | 3554315.094 | 2923922.025 | 1638145.73  | 2404529.13  | 1300725.69  |
| 7553706.515 | 8399853.749 | 3201247.299 | 8710113.984 | 4157088.456 | 5675012.228 | 5149196.529 | 7160816.509 |
| 1492855.449 | 2859303.974 | 7242999.868 | 1753107.752 | 2028560.014 | 1706375.349 | 3402845.983 | 2557057.582 |
| 3448148.072 | 6414443.463 | 2855253.237 | 4013118.775 | 4117812.332 | 5288366.928 | 4714299.271 | 3406085.104 |
| 6040816.091 | 2185557.619 | 4169754.235 | 4942724.518 | 3672120.069 | 3047442.068 | 3157673.467 | 3020408.706 |
| 10015887.66 | 9844430.351 | 6684544.764 | 6310379.564 | 5261023.815 | 3515957.002 | 4330520.116 | 4582631.518 |
| 4011536.238 | 2793978.981 | 2322580.18  | 2214517.022 | 1857985.424 | 2213573.897 | 2369636.73  | 2533879.921 |
| 4340874.374 | 10628408.01 | 2116978.714 | 4941060.751 | 3258297.784 | 3371811.521 | 3434962.436 | 4816128.003 |
| 2734126.136 | 4141612.356 | 1043325.333 | 1224901.145 | 1066312.626 | 2141830.097 | 1267360.021 | 1890421.659 |
| 635671.0146 | 688557.1869 | 4010330.482 | 1267080.112 | 4739870.801 | 520231.9704 | 511714.7526 | 492068.2431 |
| 718683.4199 | 2940503.874 | 594951.1449 | 1174927.417 | 7935165.709 | 2180624.462 | 1387277.077 | 1115637.16  |
| 2672444.707 | 2096161.11  | 269603.5722 | 2257532.245 | 2080355.793 | 3013979.84  | 3037770.091 | 2306749.987 |
| 2530565.351 | 2126770.682 | 1755362.44  | 1878312.463 | 1194032.819 | 1764385.487 | 1453881.284 | 1565106.605 |
| 5433800.645 | 5486684.49  | 4016533.197 | 5302711.566 | 4595442.99  | 3932768.179 | 4691985.264 | 4685127.552 |
| 3073714.906 | 3866566.075 | 2465939.547 | 3364145.533 | 3141135.637 | 3029787.226 | 3712722.991 | 3912391.418 |
| 2202754.42  | 2097186.065 | 2362815.749 | 2165987.845 | 1340509.685 | 1746275.393 | 2186087.788 | 1965551.32  |
| 2546992.627 | 2946896.465 | 4466965.41  | 5168920.488 | 6117619.171 | 3868583.816 | 4408965.693 | 3342027.351 |
| 1490146.493 | 1688882.47  | 685360.7582 | 731561.8902 | 1250436.413 | 3459986.917 | 2216996.349 | 1850975.988 |
| 4600410.45  | 5269748.494 | 3266252.723 | 4325903.189 | 4557006.908 | 4333738.897 | 4516920.116 | 4519187.222 |
| 2145108.618 | 2023398.171 | 808604.4531 | 1797121.125 | 7202553.406 | 1333296.683 | 1859878.21  | 1716471.236 |
| 2684471.555 | 9118069.67  | 2586305.799 | 4012903     | 2036234.661 | 2226033.218 | 2270165.093 | 3096344.151 |
| 2421703.575 | 2142405.689 | 2725723.627 | 3469399.465 | 2584046.094 | 4214446.752 | 2826044.607 | 2709201.466 |
| 2231238.482 | 2386768.122 | 259062.0334 | 1728944.79  | 247532.8465 | 2658334.456 | 1753977.827 | 1343138.363 |
| 6269375.383 | 328062.7677 | 2371509.674 | 341281.3936 | 4501464.267 | 300774.7433 | 325223.0527 | 314028.905  |

|             |             |             |             |             |             |             |             |
|-------------|-------------|-------------|-------------|-------------|-------------|-------------|-------------|
| 1093158.583 | 1059935.166 | 884963.2692 | 1114178.433 | 1132082.053 | 2144368.043 | 1245414.671 | 1402182.116 |
| 2663189.252 | 4128119.387 | 2152643.519 | 3324675.358 | 2890786.296 | 3729098.182 | 4419207.745 | 3868357.588 |
| 3254089.918 | 2593438.598 | 2378630.788 | 2816753.58  | 2754704.805 | 3048875.89  | 2745141.217 | 3179297.212 |
| 4109347.327 | 5409365.997 | 2137918.526 | 4130549.808 | 1707763.263 | 3320181.04  | 3505952.731 | 3238016.953 |
| 3209606.547 | 2536310.946 | 2128174.496 | 2575284.077 | 3017826.631 | 3222883.003 | 4187359.004 | 2067990.64  |
| 3786943.463 | 4150791.515 | 2897256.039 | 4374021.711 | 3785511.346 | 3870289.041 | 3379040.686 | 3260095.984 |
| 2813738.019 | 1665677.16  | 2227107.912 | 4287336.131 | 2167528.251 | 3274795.052 | 3267448.699 | 3597795.483 |
| 4279768.903 | 4341137.195 | 3124725.777 | 3793853.996 | 4231880.709 | 3759504.375 | 4094322.147 | 4035403.259 |
| 3880395.013 | 3890376.46  | 3254863.566 | 1943069.092 | 4127401.571 | 2415473.313 | 2350640.623 | 3007016.428 |
| 5159149.827 | 1455827.186 | 3855964.344 | 1616781.439 | 5933190.382 | 3386986.567 | 2493231.535 | 2863020.538 |
| 4377723.389 | 3796000.416 | 1450005.371 | 4168391.305 | 2583886.359 | 3568128.508 | 3012348.815 | 2277964.3   |
| 5319905.373 | 3609416.275 | 3939619.942 | 2966799.889 | 4716855.068 | 2605450.89  | 3900087.092 | 3346157.303 |
| 3812424.559 | 945159.7901 | 3063016.185 | 1910626.624 | 5274628.509 | 3136453.268 | 3215815.544 | 2429405.155 |
| 3837519.079 | 2122129.538 | 735957.6872 | 1869762.474 | 1493696.663 | 3422650.993 | 2140369.929 | 1714715.788 |
| 2528214.204 | 2291478.386 | 2354742.359 | 2103034.105 | 2885138.876 | 3181404.017 | 2693739.636 | 2087760.338 |
| 1906408.088 | 4459780.407 | 1480436.802 | 2243097.428 | 2873607.91  | 2427229.54  | 2641286.657 | 3215514.594 |
| 2948881.21  | 2524323.974 | 1200247.905 | 1388027.485 | 1902688.724 | 2161792.759 | 2959967.782 | 1911806.492 |
| 2318537.238 | 1169894.297 | 1648638.036 | 1203525.345 | 4583587.897 | 2928388.262 | 1644917.49  | 1644502.909 |
| 1144622.634 | 5305937.953 | 307205.402  | 372847.6002 | 340659.2485 | 796889.9267 | 1006727.925 | 854136.0429 |
| 975707.6628 | 1909373.472 | 1384577.494 | 918159.4289 | 660929.4592 | 1749561.692 | 1217935.108 | 1824477.276 |
| 386669.7224 | 609540.3386 | 317393.6391 | 561522.6084 | 463546.152  | 452017.0815 | 650765.8649 | 416109.2532 |
| 2277342.169 | 2698492.718 | 2084485.683 | 2886545.294 | 1909660.227 | 1875747.858 | 2690577.714 | 2222628.999 |
| 5001735.583 | 3348062.6   | 2330624.533 | 1970370.143 | 2743970.082 | 2194877.22  | 2339432.174 | 2293292.932 |
| 886731.9785 | 1409806.768 | 950029.7164 | 1278161.234 | 1406207.225 | 2063972.124 | 1423597.286 | 1326900.445 |
| 1825364.9   | 1674885.732 | 2573310.901 | 2248438.088 | 1646999.113 | 2301332.348 | 2052044.882 | 1644189.03  |
| 2278200.371 | 1824905.848 | 2213023.656 | 2138252.112 | 835796.9321 | 1592428.537 | 1997584.217 | 1622742.964 |
| 828127.2532 | 1361718.979 | 270619.6355 | 1002793.482 | 486617.4354 | 2265673.21  | 1290263.579 | 1448756.241 |
| 657877.6779 | 593519.3557 | 452644.4468 | 301815.9552 | 1120449.688 | 660592.258  | 619223.2659 | 397198.0541 |
| 979443.3455 | 1374445.407 | 784192.3356 | 1331221.409 | 1245623.22  | 1901689.077 | 1196133.479 | 1388331.092 |
| 300481.1864 | 323291.7103 | 146841.2388 | 200329.8541 | 169586.4789 | 581651.5853 | 501885.1141 | 348745.72   |
| 528433.2436 | 3173786.62  | 923022.225  | 2490910.174 | 726708.2833 | 1504800.413 | 1522167.621 | 2035474.07  |
| 2214868.783 | 1684299.979 | 875022.9982 | 2291038.947 | 1167945.252 | 1746534.419 | 2106857.17  | 1282219.761 |
| 452911.6182 | 3711988.248 | 299715.672  | 184258.3468 | 381562.8587 | 391141.6591 | 456609.237  | 309426.4639 |
| 1727885.762 | 1278437.402 | 668936.066  | 1622873.996 | 1134603.574 | 1492412.579 | 976517.0411 | 1141217.362 |
| 695349.289  | 1588066.871 | 728903.8784 | 719054.4735 | 1627184.151 | 1107315.772 | 869849.4079 | 1199916.094 |
| 825495.3159 | 585355.1432 | 1557249.805 | 522423.5967 | 1914396.022 | 653652.6909 | 727261.2214 | 768808.4797 |
| 517946.1118 | 440074.6766 | 370129.7544 | 477623.3901 | 429390.4066 | 414535.302  | 411344.3807 | 534539.5789 |
| 195449.1179 | 127478.1441 | 147880.934  | 1182850.171 | 174381.1712 | 178880.2401 | 137223.8559 | 111882.493  |
| 2637151.428 | 2058686.07  | 1122617.324 | 2640687.769 | 2147352.821 | 1172214.679 | 1594226.959 | 1644696.118 |
| 871205.678  | 758248.4685 | 244377.305  | 525837.0776 | 575219.9585 | 357127.6593 | 498942.2148 | 574833.0139 |
| 686107.1496 | 414753.6287 | 429756.2875 | 574906.0675 | 510574.2335 | 426309.3447 | 630209.5708 | 514194.8117 |
| 106392.1274 | 95879.85888 | 59619.63735 | 94270.90339 | 109063.6804 | 138742.0756 | 88486.67618 | 84092.97792 |
| 1169852866  | 1279193114  | 4212848857  | 917800838.4 | 7437786680  | 1520308425  | 954700098.2 | 1386359738  |
| 666303535.1 | 484924536.4 | 439351232.3 | 1021060950  | 552594548.7 | 1131752569  | 880941930.6 | 804888414.5 |
| 245657466.8 | 323136089.2 | 286519043.2 | 155336864.4 | 73670636.23 | 188655784   | 219584537.4 | 235391011.3 |
| 109070695.9 | 126439340.1 | 98613184.62 | 123405002.8 | 218949128.8 | 140187156.4 | 153610533   | 154939854.3 |
| 218878971.1 | 180192230.9 | 379075848   | 177341044.9 | 130740200.2 | 214726415.5 | 235932284.6 | 253129101.7 |
| 266096370.1 | 231272100.2 | 263498580.7 | 195716233.3 | 336923828.5 | 182272583.5 | 301517322   | 294848888.4 |
| 219129255.6 | 173587468.8 | 210149642.8 | 270876950.3 | 90818885.37 | 139045730.8 | 218915001.3 | 240886590.8 |
| 369666551.8 | 299348200.5 | 251858451.2 | 218956146.9 | 434579277.7 | 283860545.7 | 318667590.8 | 314058979.7 |
| 155223629.8 | 118053573.2 | 315301402.3 | 214559451.4 | 112911950.5 | 132012936.6 | 210308128.6 | 201656723.1 |
| 342451752   | 265442165   | 297501765   | 273151750.8 | 385726980.4 | 208016683.7 | 253197617.5 | 254120077.7 |
| 109602840.4 | 113542692.7 | 111064553.1 | 111878909.4 | 115560502.7 | 155826858   | 150975959.7 | 143574197   |
| 122283641.6 | 109061288.1 | 109176950.4 | 111814545.3 | 117660522.2 | 113616760.9 | 143429636.1 | 140939932.2 |

|             |             |             |             |             |             |             |             |
|-------------|-------------|-------------|-------------|-------------|-------------|-------------|-------------|
| 262953168.8 | 163440490.8 | 126335837.1 | 189002642.9 | 128070078.4 | 159055031.5 | 182457947.2 | 207536754   |
| 85369181.61 | 153649225.7 | 36049379.72 | 168593174.2 | 85987932.61 | 140840511.1 | 121080549.8 | 142756858   |
| 181785005.1 | 150761301.2 | 101551411.2 | 235976889   | 164757117   | 147824989.2 | 195554824.9 | 215565729.3 |
| 172142179.3 | 101360078.2 | 98356989.1  | 110402744.2 | 118192439.2 | 114288060.7 | 151652231.7 | 132557153.2 |
| 127663178.6 | 120321942   | 110541685.9 | 115944768.9 | 114669599.7 | 114430844.7 | 149360243.5 | 148443791.1 |
| 54462763.48 | 70076354.28 | 64916734.74 | 48102425.49 | 46832881.98 | 71636744.35 | 64318719.87 | 73551142.64 |
| 78401055.63 | 68100216.17 | 44003411.75 | 99461490.4  | 41197589.26 | 107362586.4 | 86832396.7  | 81086035.79 |
| 127498812.1 | 108440141.8 | 90643778.07 | 104679119.4 | 140481987.9 | 124235813   | 118738471.4 | 120870803.9 |
| 97199369.03 | 59893028.31 | 58417425.85 | 76452352.19 | 66190656.5  | 94208089.29 | 87057764.43 | 84875473.79 |
| 37793860.49 | 34561507.28 | 51110497.64 | 33201255.66 | 86365982.66 | 59441496.12 | 51300119.9  | 50103172.11 |
| 48731113.37 | 37443555.29 | 41842758.37 | 51612163.07 | 34327430.36 | 70408653.7  | 58967853.23 | 63885931.71 |
| 138773241.8 | 103317117.4 | 37728733.42 | 101350853.4 | 125568794.8 | 107103249.3 | 125714255.4 | 114481085.4 |
| 58104443.9  | 43329417.73 | 75880072.47 | 150090808.5 | 8472378.317 | 90771469.29 | 78422847.41 | 52853491.31 |
| 41235576    | 118456379.9 | 42354377.14 | 22749703.05 | 89832236.54 | 48778086.41 | 45250796.61 | 46291989.07 |
| 113176102.2 | 142255265.8 | 67330343.55 | 107612417   | 97245908.88 | 81266317.17 | 140222163.4 | 133103809.1 |
| 31100930.88 | 31078669.03 | 26763918.9  | 35646674.17 | 52722202.43 | 47014334.82 | 56214722.14 | 47839176.58 |
| 29443348.56 | 33356447.03 | 30561235.08 | 37998831.69 | 34526566.42 | 57259866.76 | 48668896.96 | 45385857.21 |
| 39426495.38 | 88072705.63 | 61517470.61 | 59305863.98 | 38989183.3  | 45319788.9  | 44962660.38 | 46581071.67 |
| 42721308.7  | 49388486.73 | 72944256.18 | 60763811.46 | 30839242.57 | 51683013.42 | 58413180.43 | 58245097.34 |
| 75321325.11 | 45215077.41 | 48439665.74 | 39899041.74 | 52711757.39 | 56998655.53 | 59038592.11 | 56684252.87 |
| 82661969.17 | 46478070.5  | 52799675.26 | 53794681.29 | 26947795.75 | 47303444.47 | 50401341.75 | 59423035.13 |
| 70728594.35 | 97534974.87 | 88078448.61 | 71684142.02 | 92706090.13 | 52964758.72 | 71775612.38 | 81824929.67 |
| 25442385.19 | 87051641.05 | 11168333.2  | 93242725.63 | 4899027.227 | 57800014.05 | 44652131.74 | 43876383.22 |
| 67806227.4  | 41907727.42 | 3922021.721 | 17075696.38 | 1806773.287 | 27130910.57 | 19322417.97 | 25828372.92 |
| 15409402.29 | 12285536.78 | 9972434.618 | 10092038.38 | 14179471.17 | 21600420.31 | 29583320.77 | 26179528.78 |
| 24965802.28 | 29744458.98 | 24226698.54 | 23984455.86 | 27161616.5  | 22382430.46 | 24142595.23 | 29949191.99 |
| 60161091.98 | 41130631.58 | 35581856.09 | 36349525.73 | 40589630.51 | 56890731.22 | 60312660.35 | 57399230.14 |
| 41340126    | 25508854.18 | 35118502.68 | 44828180.84 | 5111946.042 | 48920239.4  | 51136072.93 | 51608229.99 |
| 25816681.36 | 40398400.56 | 77161466.88 | 22973924.95 | 68468605.91 | 27346939.12 | 52188641.32 | 56620214.3  |
| 32400185.88 | 53433896.85 | 20758108.45 | 17421341.83 | 16964670.67 | 23888248.66 | 35541702.03 | 29200110.88 |
| 28143431.26 | 37062327.34 | 29263066.44 | 36054609.05 | 43294589.87 | 27733342.11 | 42867255.98 | 48488368.23 |
| 52344581.28 | 40416733.23 | 27272001.05 | 36702235.33 | 29863591    | 31511477.71 | 39807064.13 | 44637080.92 |
| 58451641.49 | 82766679.46 | 40529085.37 | 45047269.07 | 59670629.67 | 24408253.97 | 49872595.84 | 41827823.5  |
| 43952965.09 | 46064010.2  | 30861086.09 | 51982345.95 | 84452527.05 | 48831738.71 | 38536758.81 | 37266724.64 |
| 20859285.06 | 41660718.75 | 25780554.56 | 34852225.82 | 26335561.06 | 48042241.89 | 40754431.65 | 33705973.22 |
| 40812653.8  | 45861542.03 | 16435411.78 | 53299487.07 | 16331839.5  | 50195495.8  | 32764506.96 | 34518491.92 |
| 68188626.29 | 62928291.32 | 52132130.78 | 18769903.03 | 54873850.65 | 47997245.01 | 33962083.41 | 46844254.92 |
| 18999938.03 | 22431029.32 | 28391002.11 | 24740661.69 | 7919740.763 | 35104538.02 | 19410538.88 | 24986873.15 |
| 23747563.33 | 26526950.09 | 17275605.67 | 18223999.01 | 27683269.28 | 29310505.76 | 26843666.78 | 23964246.45 |
| 78570246.44 | 86272823.34 | 54944220.37 | 68942254.93 | 62109274.5  | 36767627.61 | 41219426.11 | 61902808.46 |
| 27091904.85 | 27302463.22 | 13848959.04 | 18629838.13 | 15165346.4  | 29029393.33 | 24696678.82 | 21206502.76 |
| 29108562.75 | 1473023.681 | 34718671.96 | 5033758.406 | 3803211.534 | 33754805.52 | 37462384.75 | 23406085.74 |
| 6754854.408 | 3611917.449 | 5048349.085 | 9678939.863 | 4972830.761 | 22037181.78 | 12560863.78 | 12274728.69 |
| 14302309.46 | 20839394.04 | 26147469.39 | 27255914.16 | 37628047.47 | 37339316.57 | 34458964    | 26805222.38 |
| 13863327.01 | 4745996.605 | 11547177.99 | 10215439.42 | 9155156.507 | 14625107.59 | 14177257.71 | 8862458.164 |
| 25452187.17 | 27860423.33 | 19841802.42 | 12677302.15 | 32004021.58 | 25415138.02 | 26627788.45 | 19628381.58 |
| 17633922.29 | 13958235.55 | 10797394.14 | 16828493.61 | 12523115.14 | 19588628.65 | 17180834.96 | 17626507.54 |
| 19801775.48 | 22739899.06 | 18116532.81 | 33432865.6  | 20843022.6  | 17198026.45 | 28381518.85 | 23503900.86 |
| 19401487.11 | 30411593.97 | 21038573.96 | 16767193.3  | 23580013.15 | 26260179.66 | 22239671.4  | 24697533.46 |
| 7435788.424 | 8222119.527 | 14080383.81 | 8407377.421 | 4438306.889 | 10478525.59 | 8363479.997 | 8973171.57  |
| 16869532.5  | 14711047.22 | 14324570.28 | 25880490.82 | 11676509.29 | 18909777.98 | 16729376.35 | 15662076.55 |
| 16866496.61 | 18531703.87 | 20355855.36 | 20361864.18 | 23975362.61 | 19677828.3  | 19655740.5  | 26476044.54 |
| 11271551.66 | 12524896.4  | 10161194.9  | 8950568.51  | 9005900.48  | 13618538.92 | 12311004.76 | 12992028.65 |
| 17209016.18 | 18474912.96 | 14924885.62 | 17567450.36 | 19772453.26 | 12384639.89 | 21263551.04 | 21277669.96 |

|             |             |             |             |             |             |             |             |
|-------------|-------------|-------------|-------------|-------------|-------------|-------------|-------------|
| 12228641.55 | 13597785.35 | 16182058.74 | 9732664.143 | 20936518.7  | 13203041.97 | 19528381.26 | 17513200.78 |
| 30264814.24 | 28497972.25 | 23275634.71 | 26696522.57 | 22436400.87 | 22535863.05 | 26509375.43 | 32439540.11 |
| 9780215.145 | 14008649.04 | 6150824.338 | 7921876.817 | 8228850.979 | 6145511.323 | 8765108.765 | 9237121.759 |
| 15468198.37 | 16011707.85 | 17513889.95 | 15550112.97 | 19084085.16 | 20003004.17 | 14090182.09 | 14207317.24 |
| 9932444.011 | 42055264.62 | 5893802.646 | 8781436.076 | 10462428.15 | 8464569.128 | 10125170.6  | 10834116.79 |
| 20292829.22 | 15975897.16 | 7709744.893 | 15563525.05 | 16963531.2  | 13819497.32 | 17863306.89 | 16520732.59 |
| 13207717.04 | 12582635.52 | 7168646.633 | 13362423.4  | 14807022.36 | 15880332.73 | 11545906.07 | 12019908.34 |
| 11099867.6  | 9891352.894 | 7553448.435 | 7581039.167 | 10516030.77 | 10808580.83 | 9375103.207 | 9117812.057 |
| 14512439.42 | 14526978.77 | 10665439.99 | 7171077.107 | 7643014.136 | 10580877.76 | 9116301.302 | 8662860.661 |
| 9233282.028 | 7558563.594 | 6585189.246 | 8231505.778 | 9218594.078 | 8239544.009 | 8044085.165 | 8217369.574 |
| 9205022.565 | 10306956.38 | 7229558.794 | 6942556.562 | 8482270.943 | 12442999.64 | 11032398.2  | 11213044.09 |
| 2249611.162 | 1502558.331 | 1766228.514 | 3350339.915 | 2924932.41  | 4757308.84  | 4338001.334 | 3089034.821 |
| 6423242.478 | 7817271.613 | 5087713.418 | 6983328.276 | 5674304.438 | 9503444.658 | 6454286.789 | 6089317.326 |
| 1481925.145 | 16625791.83 | 585824.1393 | 3034123.712 | 5216932.978 | 4215320.638 | 5120457.117 | 3467177.786 |
| 4152049.504 | 2247683.633 | 5087250.231 | 1913356.197 | 9750193.161 | 7292987.905 | 4520190.056 | 4701109.168 |
| 5924239.088 | 5536524.225 | 6662508.127 | 4724986.059 | 5169930.339 | 6579515.88  | 5654377.833 | 5060897.687 |
| 3780179.293 | 2650037.06  | 914896.2034 | 5040817.117 | 1314888.56  | 3518089.898 | 2837953.638 | 2684336.002 |
| 2892456.092 | 3841743.533 | 3739009.709 | 4533121.514 | 2480782.701 | 5552256.749 | 3849898.306 | 4180118.82  |
| 3714306.239 | 3637256.413 | 4765727.359 | 5528942.196 | 4361506.921 | 6388507.703 | 5703592.988 | 4981824.702 |
| 4480904.04  | 5717375.291 | 3226158.53  | 4341088.9   | 3809737.771 | 4603266.878 | 4101519.043 | 3581847.926 |
| 2102724.008 | 2405382.156 | 1707733.387 | 1735321.522 | 2432214.957 | 2420970.813 | 2689178.727 | 2343715.629 |
| 1035913.733 | 1445355.282 | 1155754.08  | 1555563.311 | 1112770.55  | 882016.1448 | 1097826.877 | 653095.3144 |
